# Supplementary material for: Cell Senescence-Independent Changes of Human Skin Fibroblasts with Age
Source: MDPI journal article supplement (doi:10.3390/cells13080659), 2024-04-09

# ACTA2

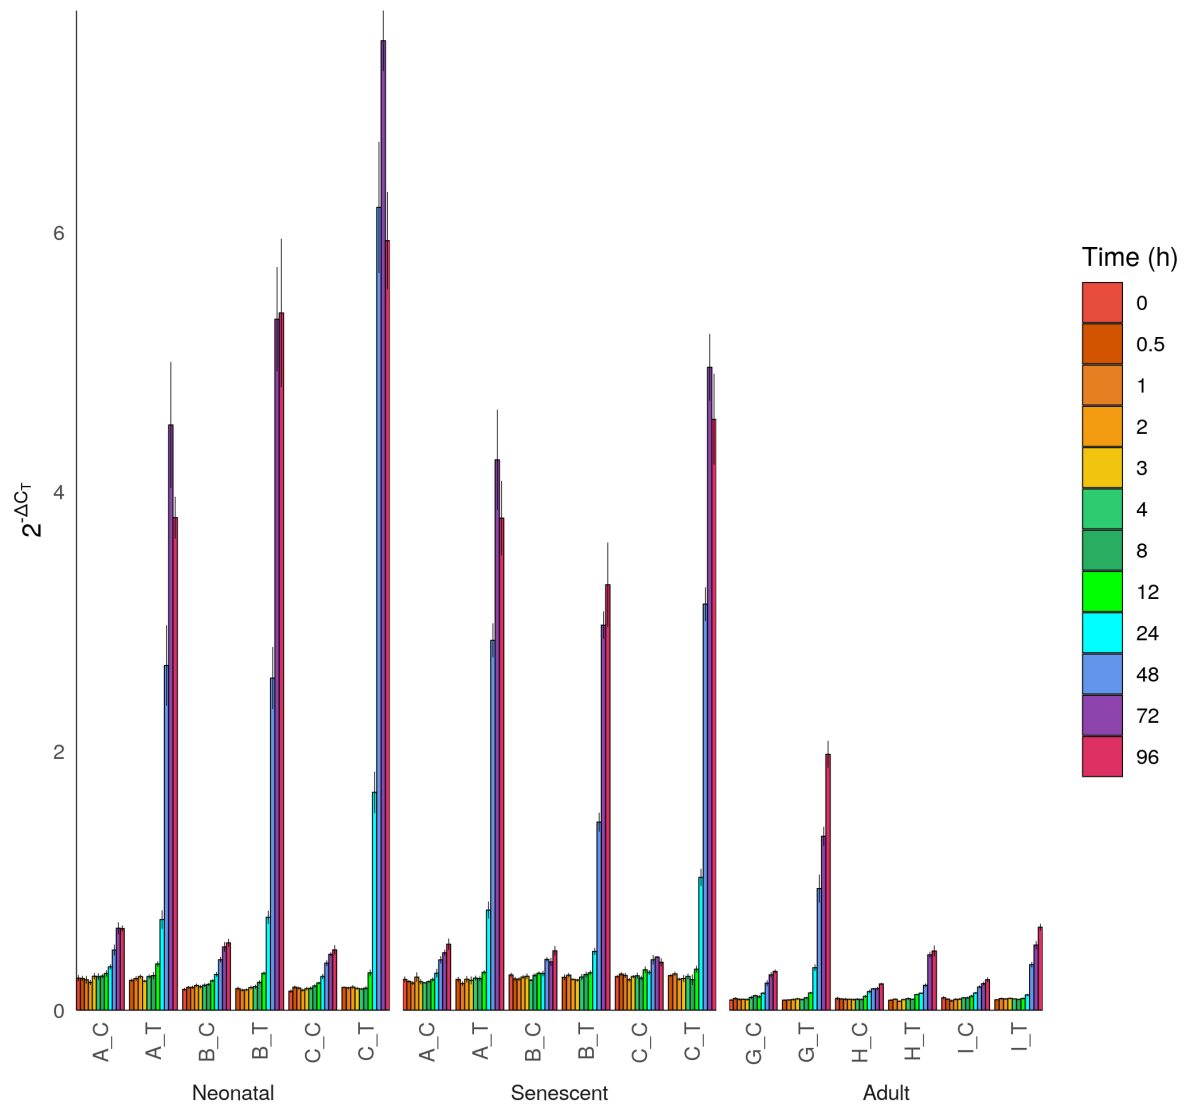

# ADAMTS1

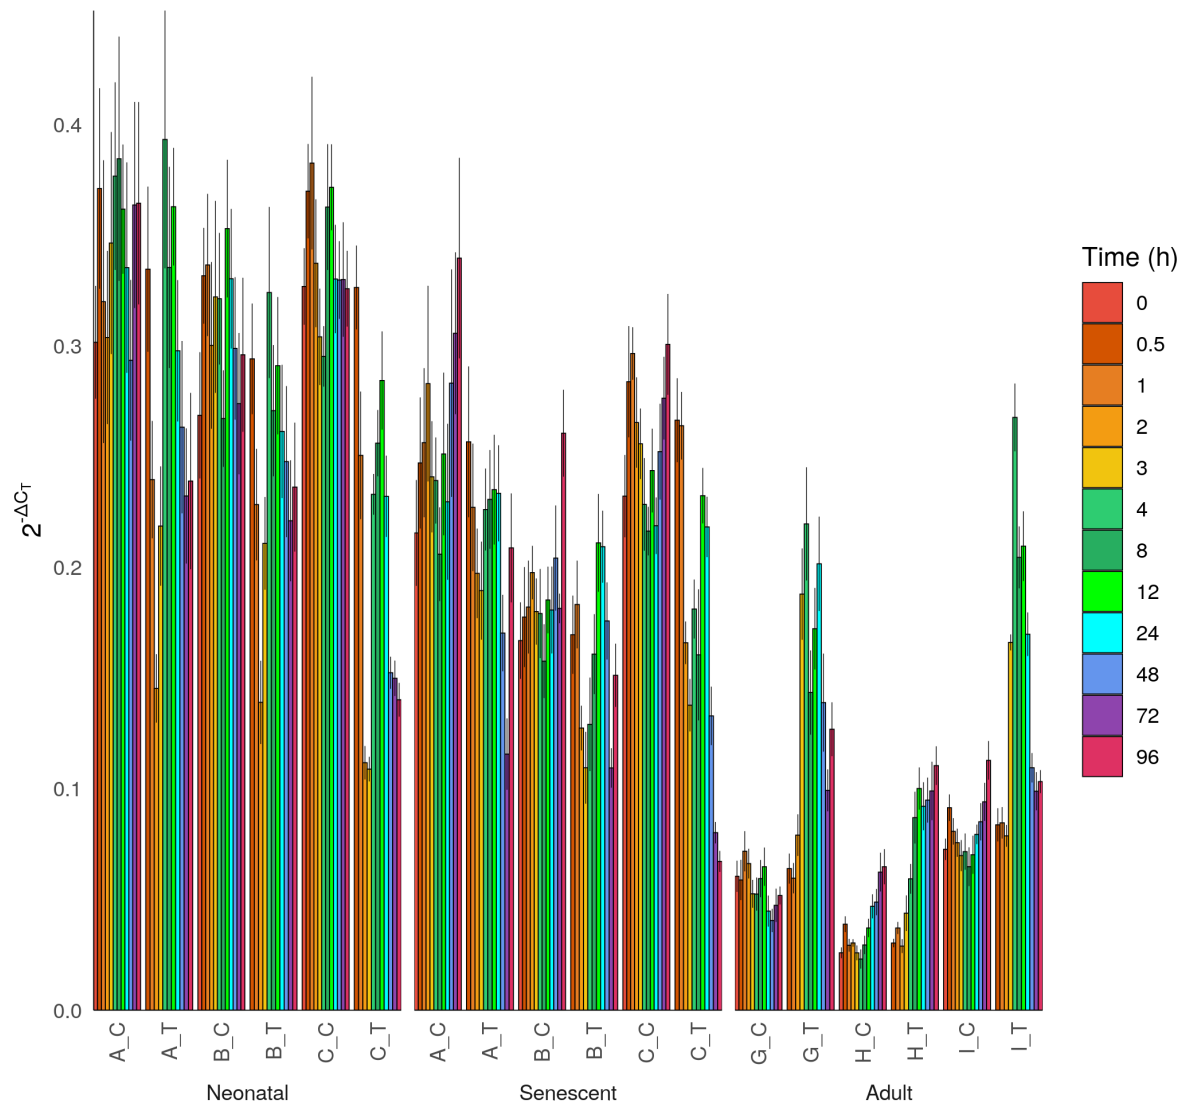

# ATP6AP1

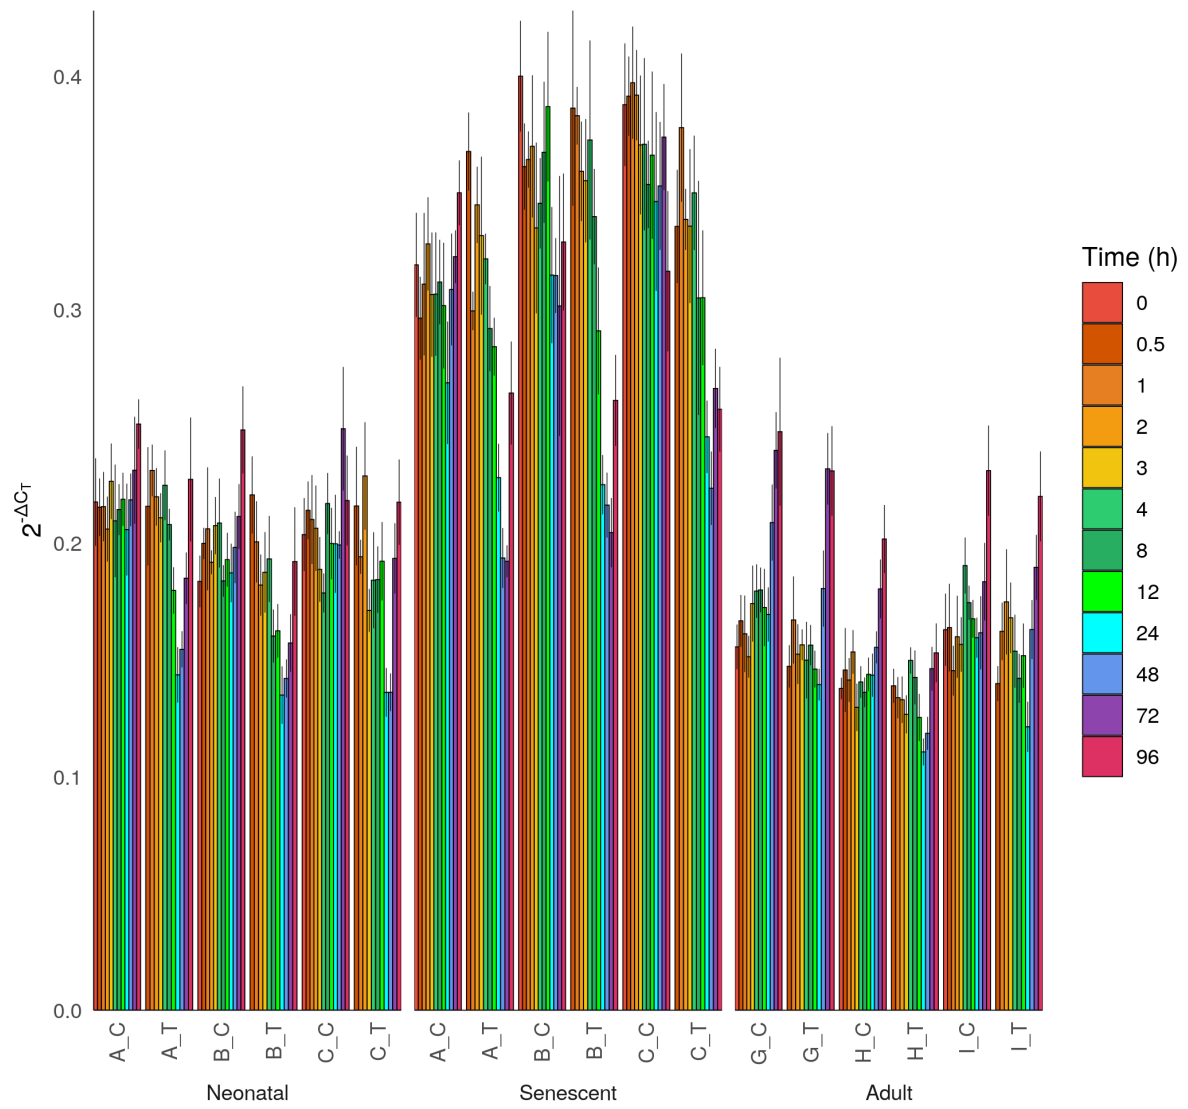

# B2M

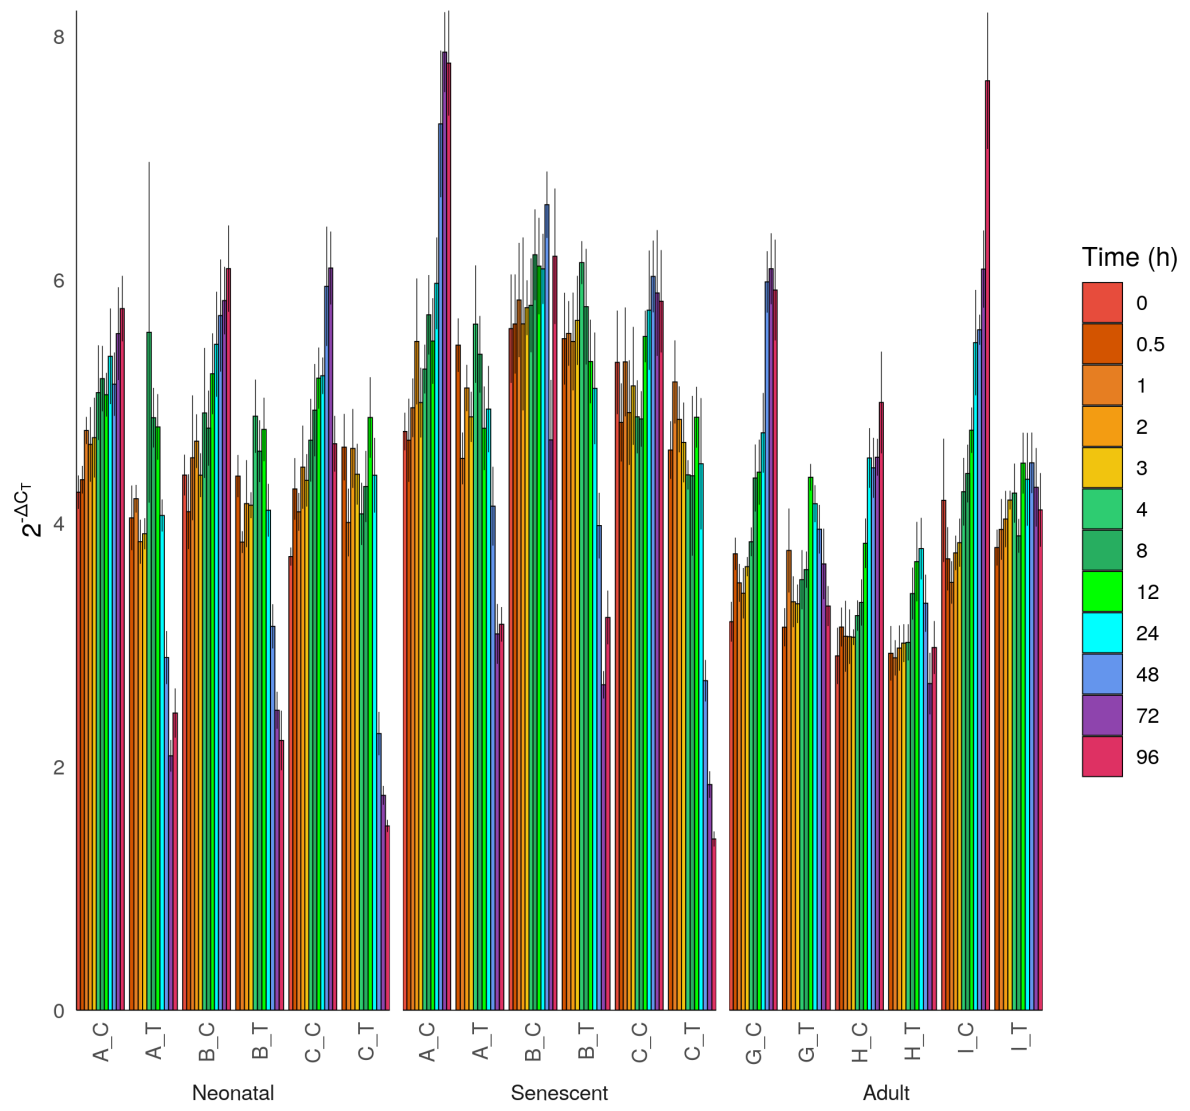



# BGN

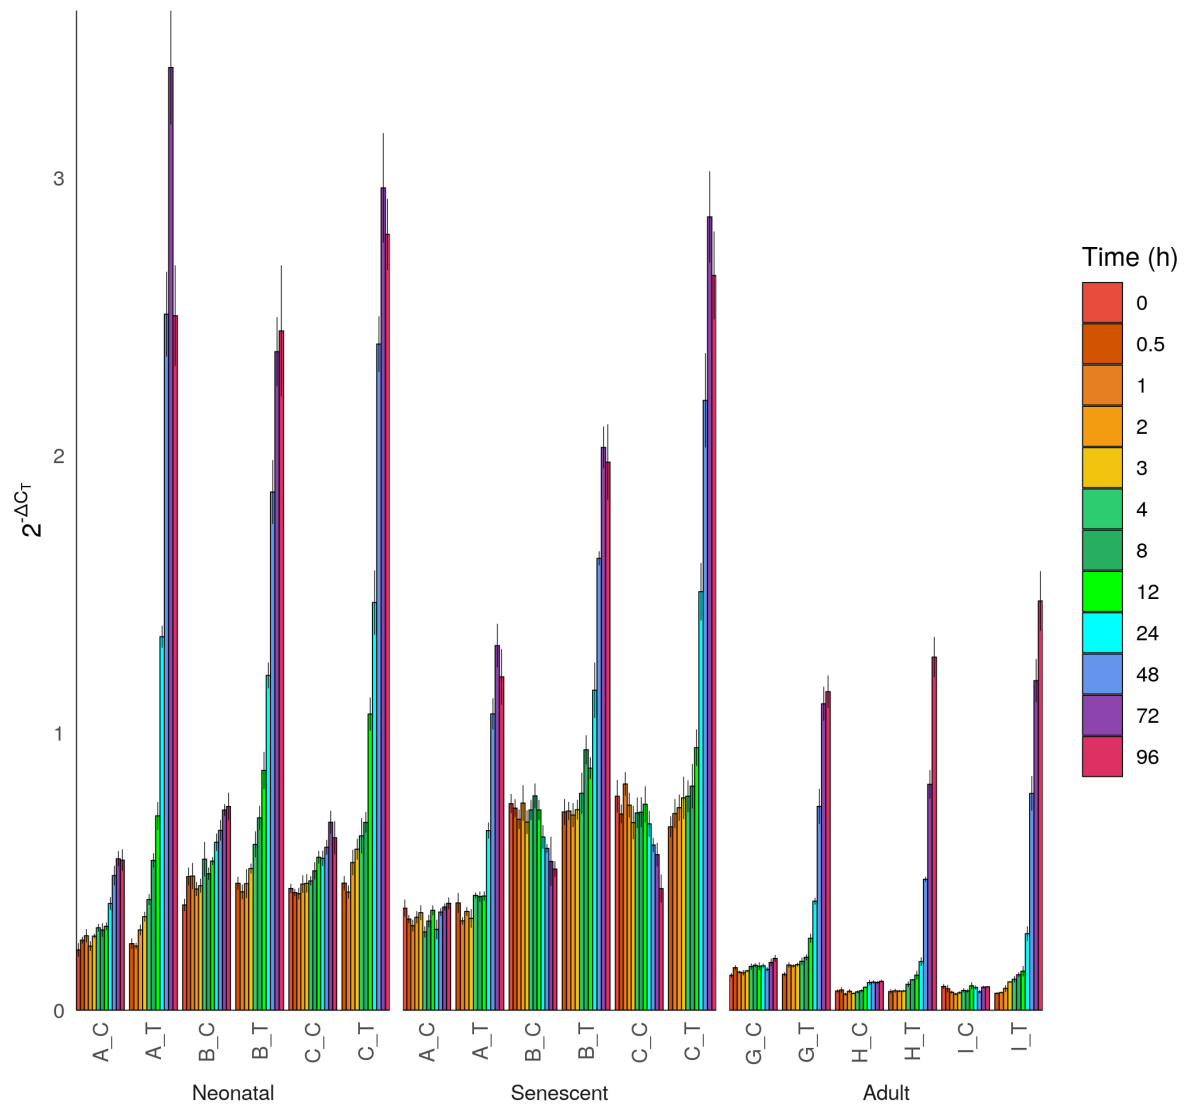

BHLHE40

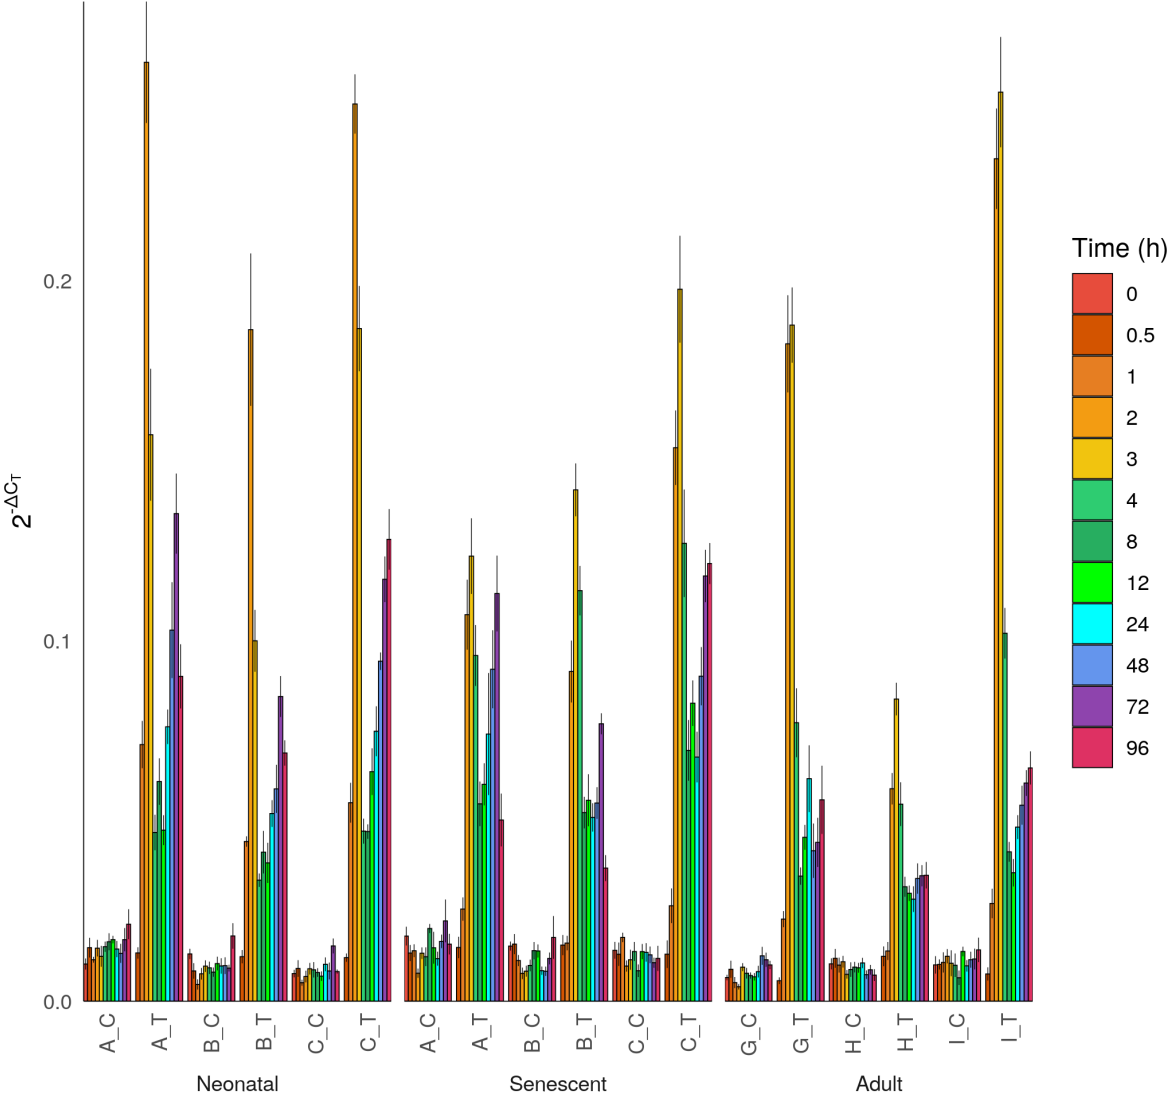

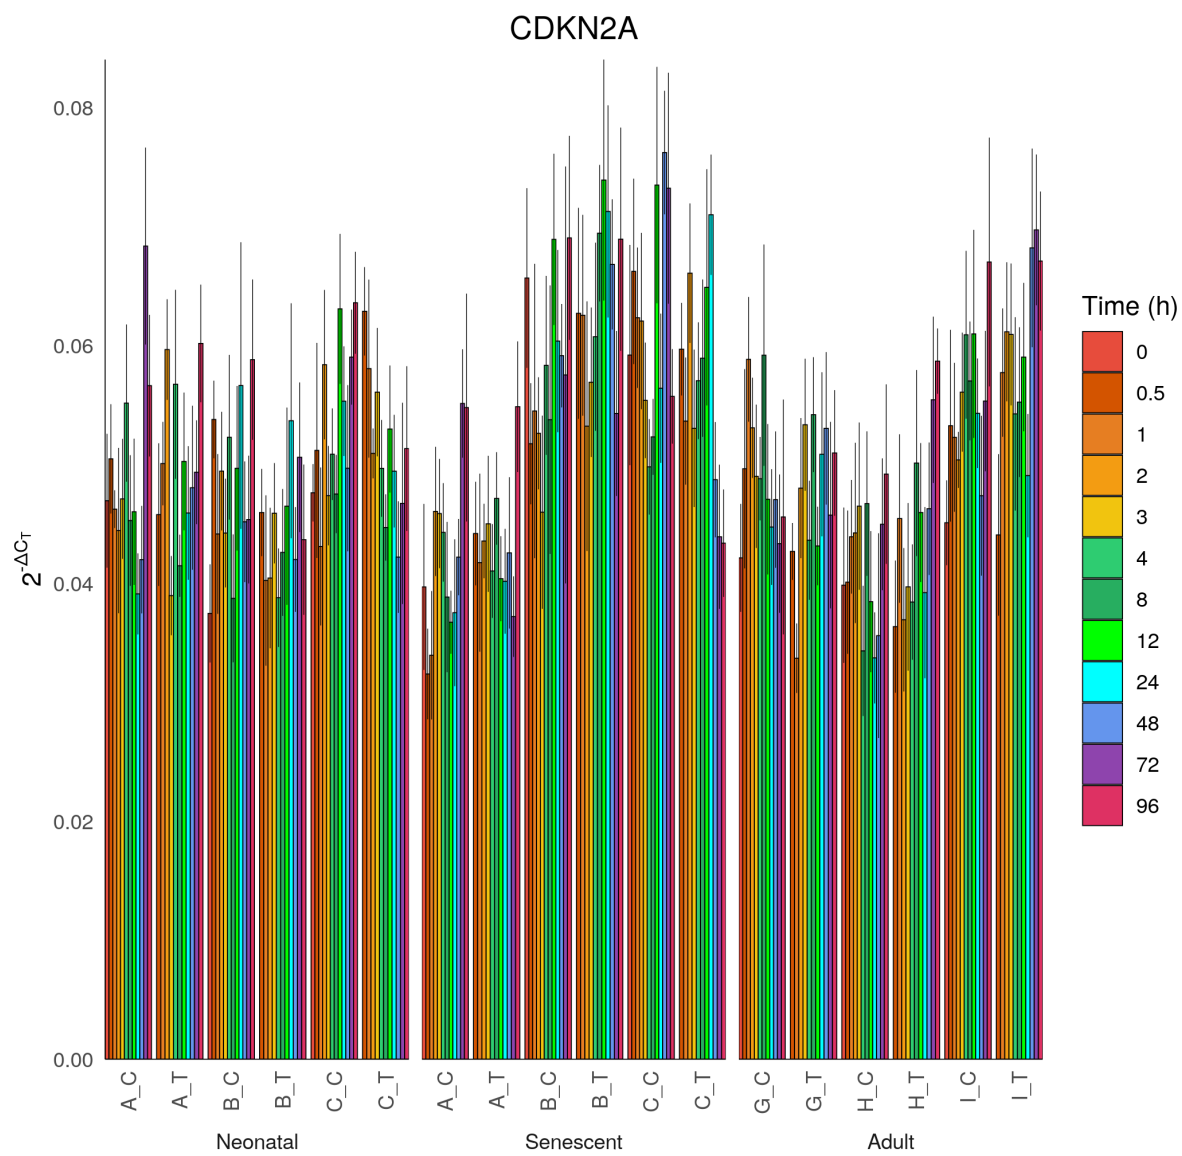

## COL1A1

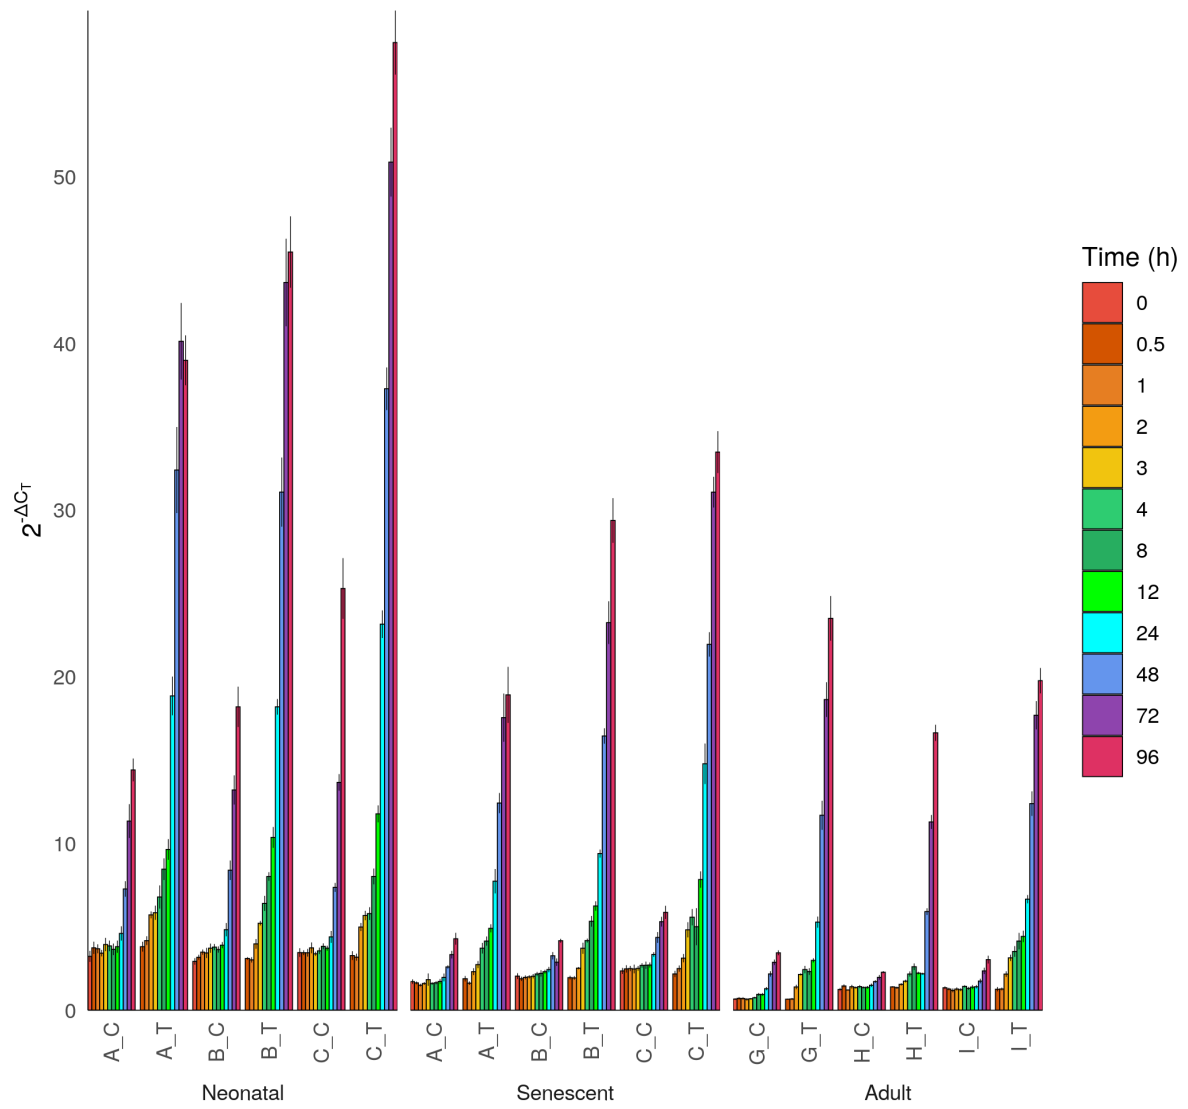

# COL1A2

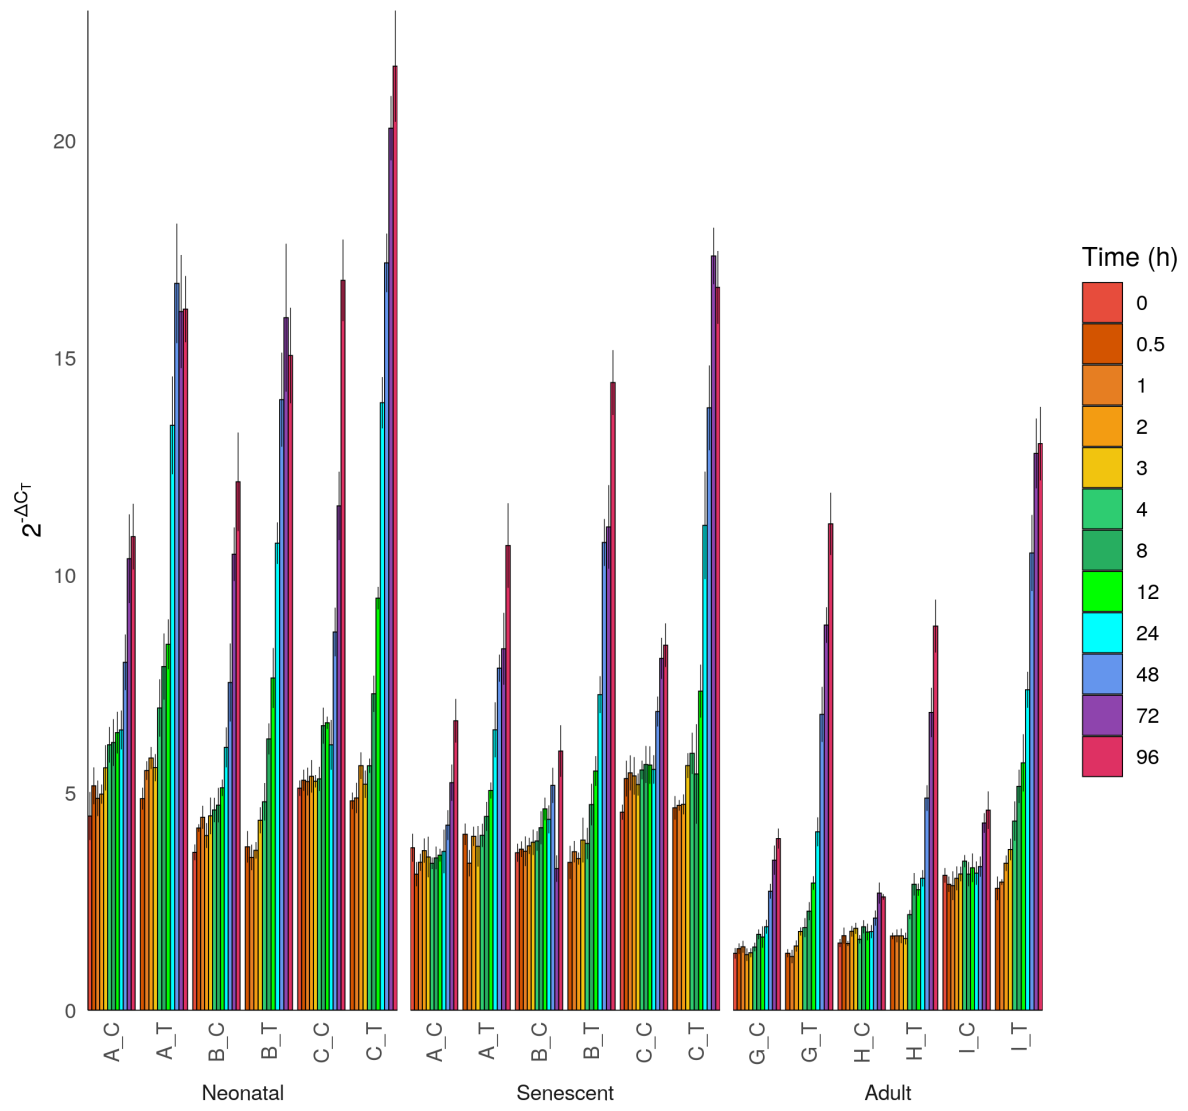

COL4A1

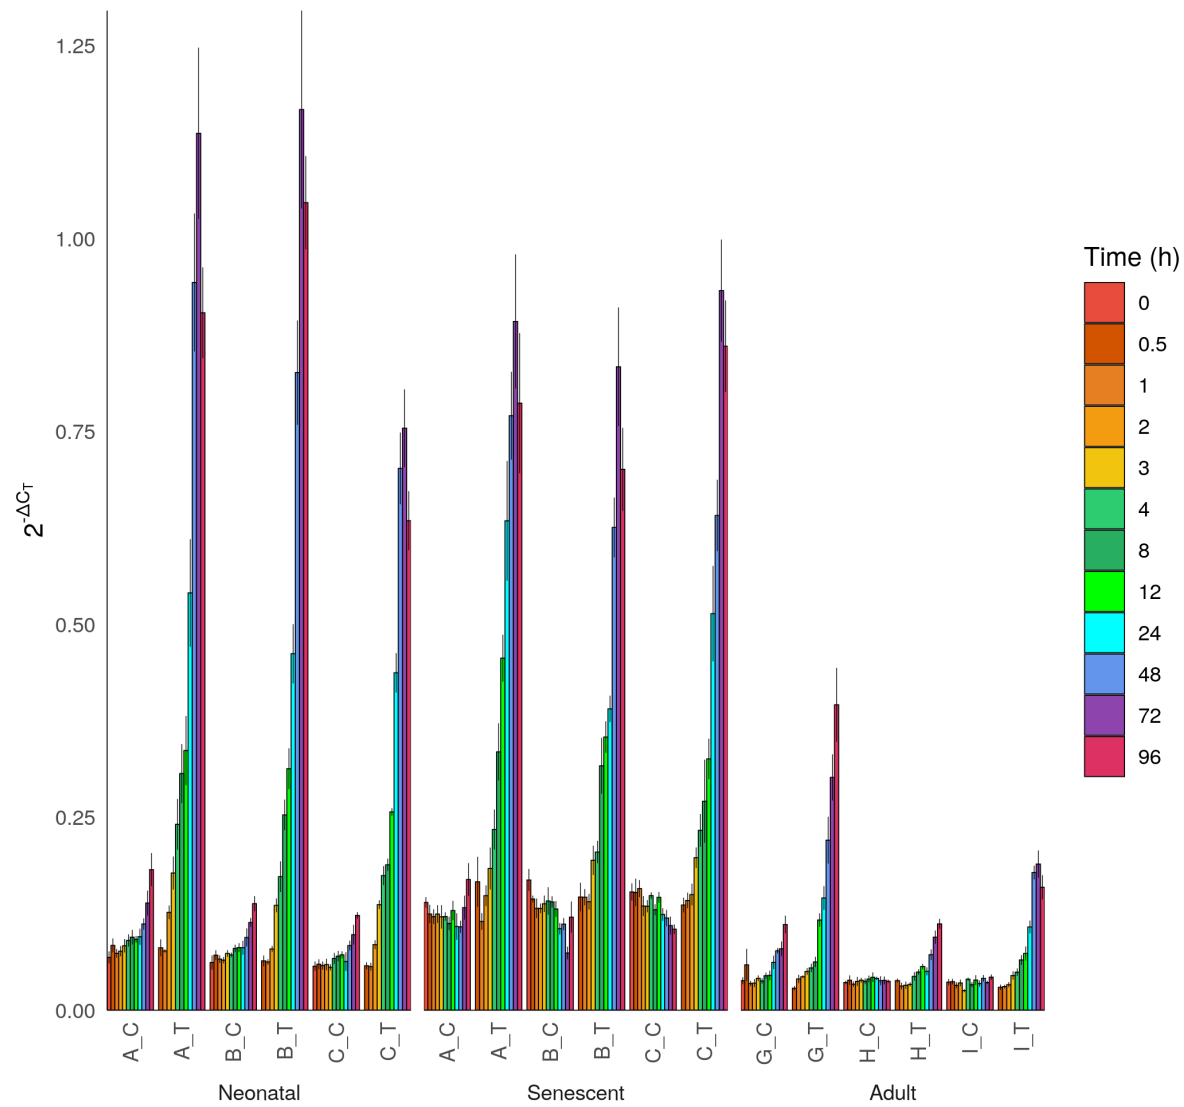

## COL5A1

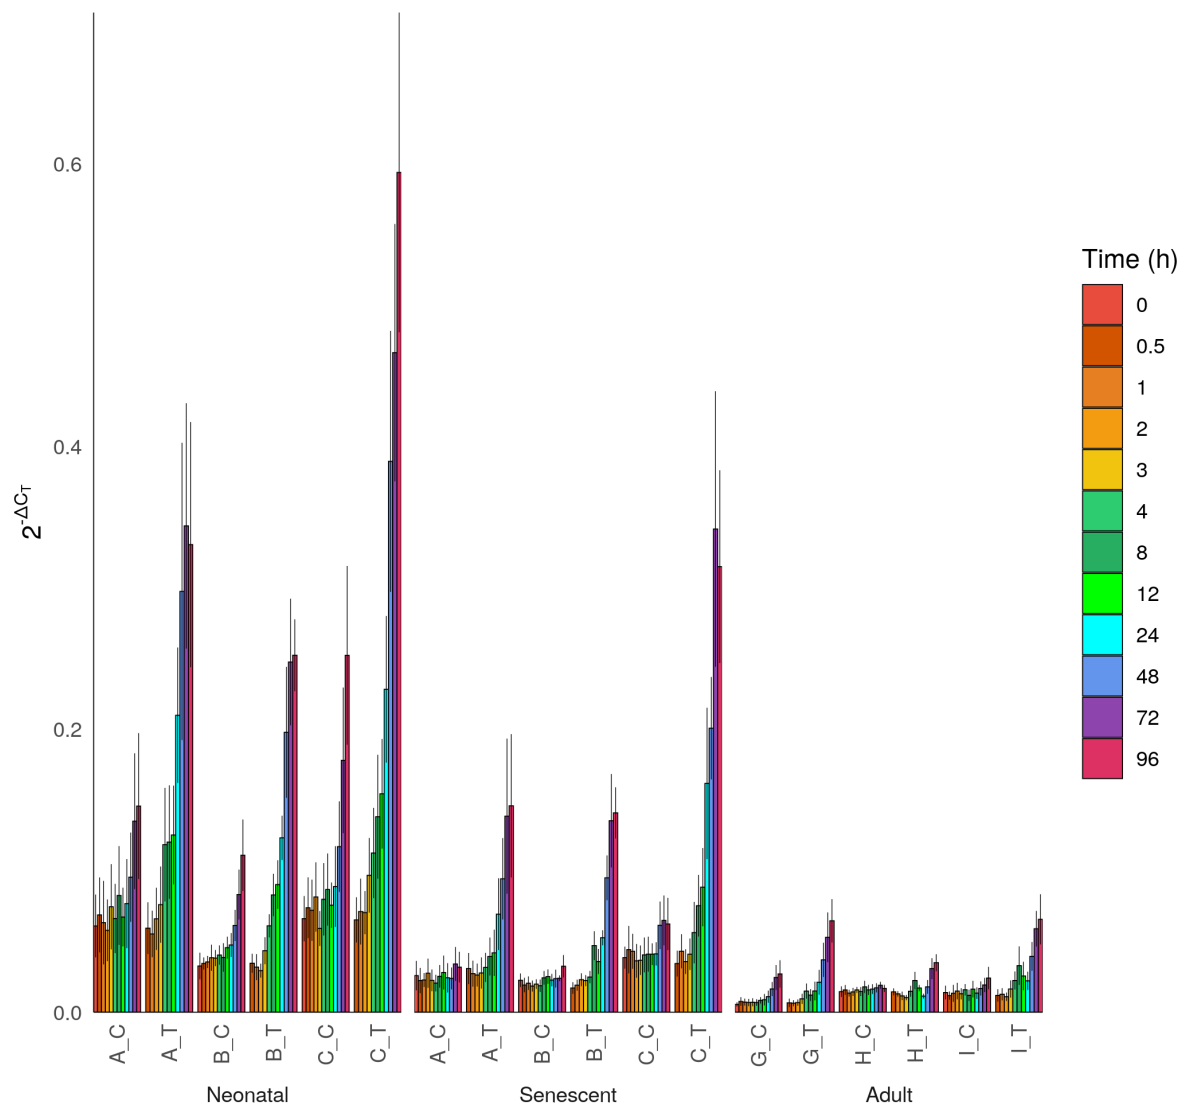

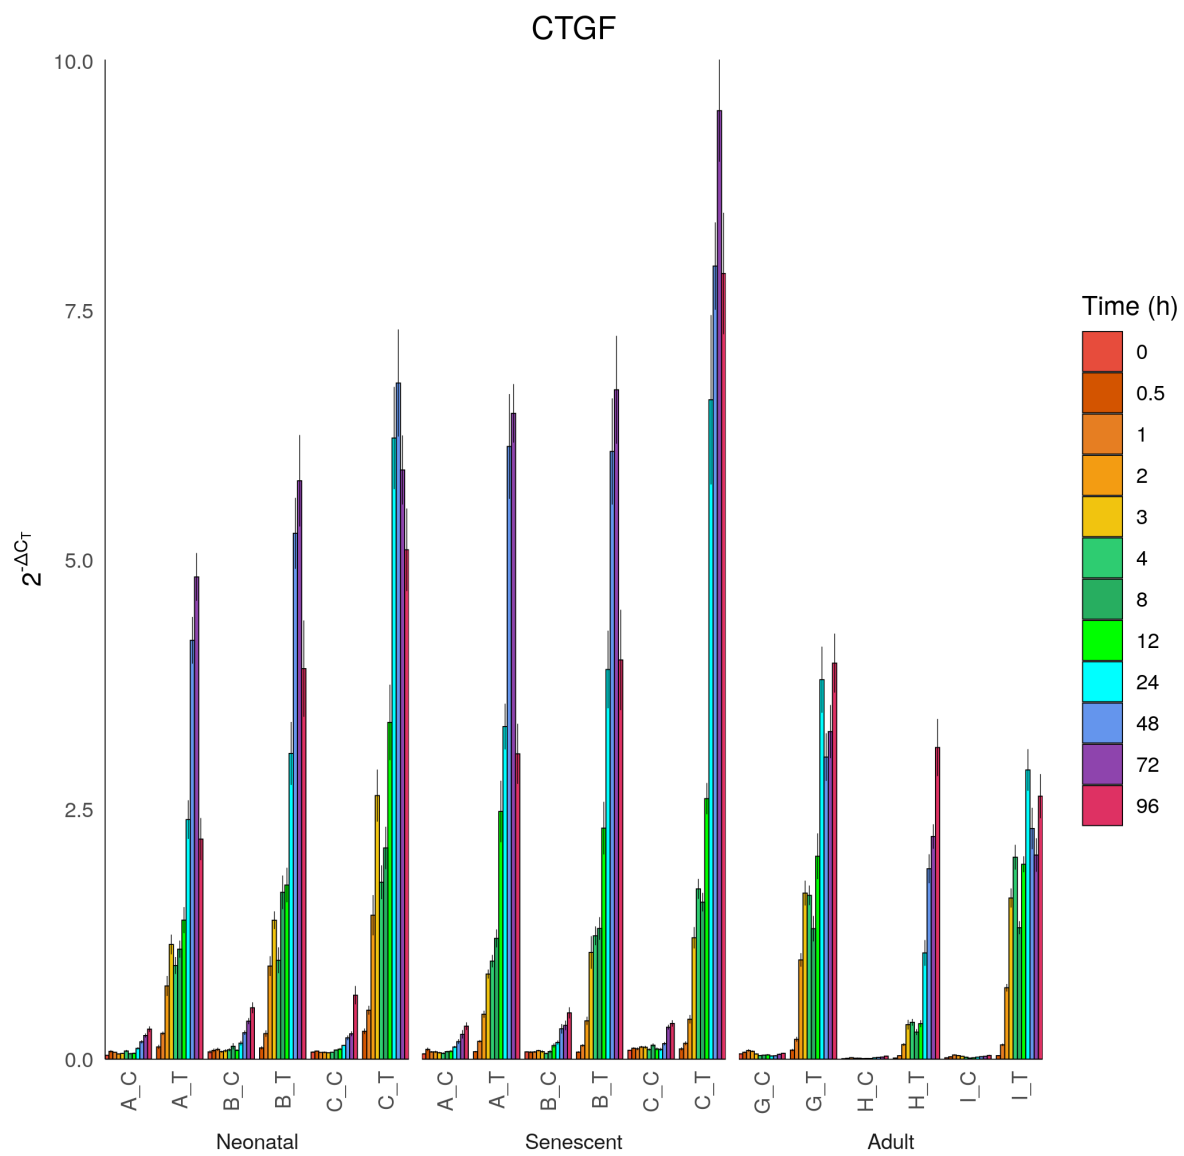



DCN

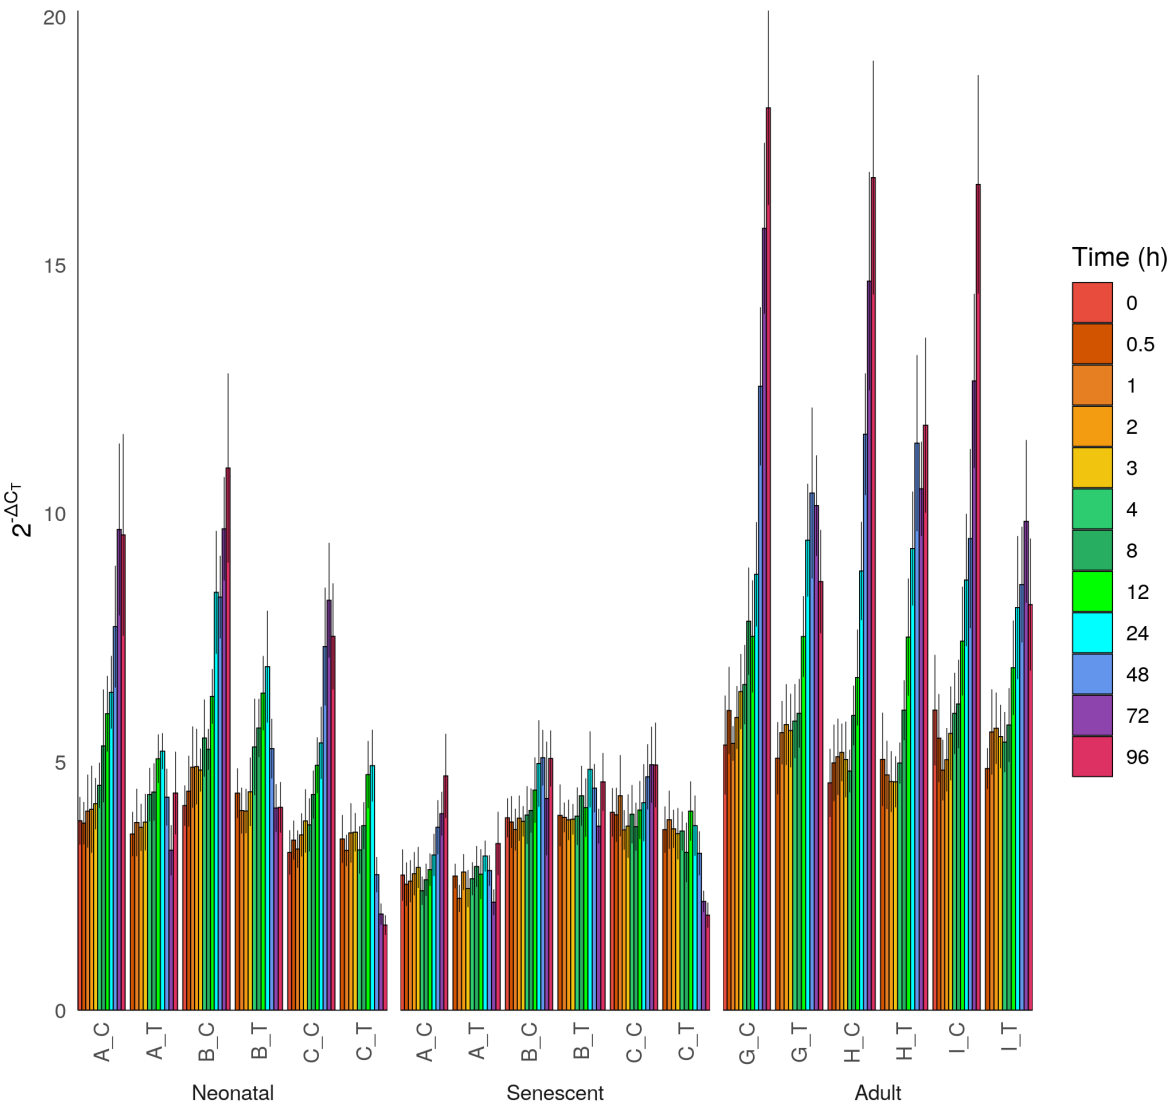

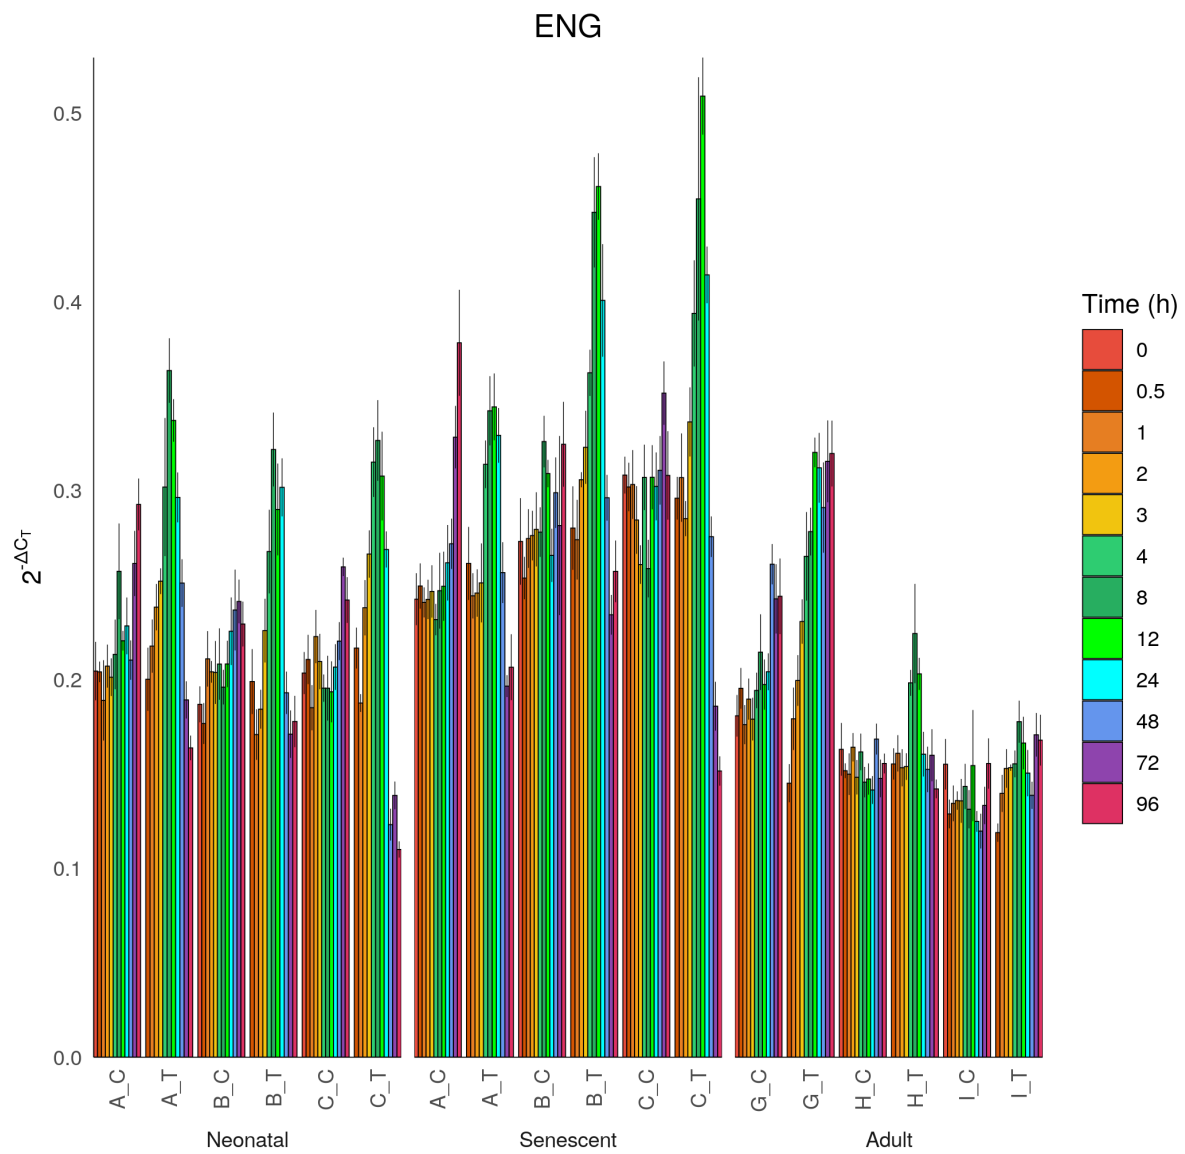

# ETS1

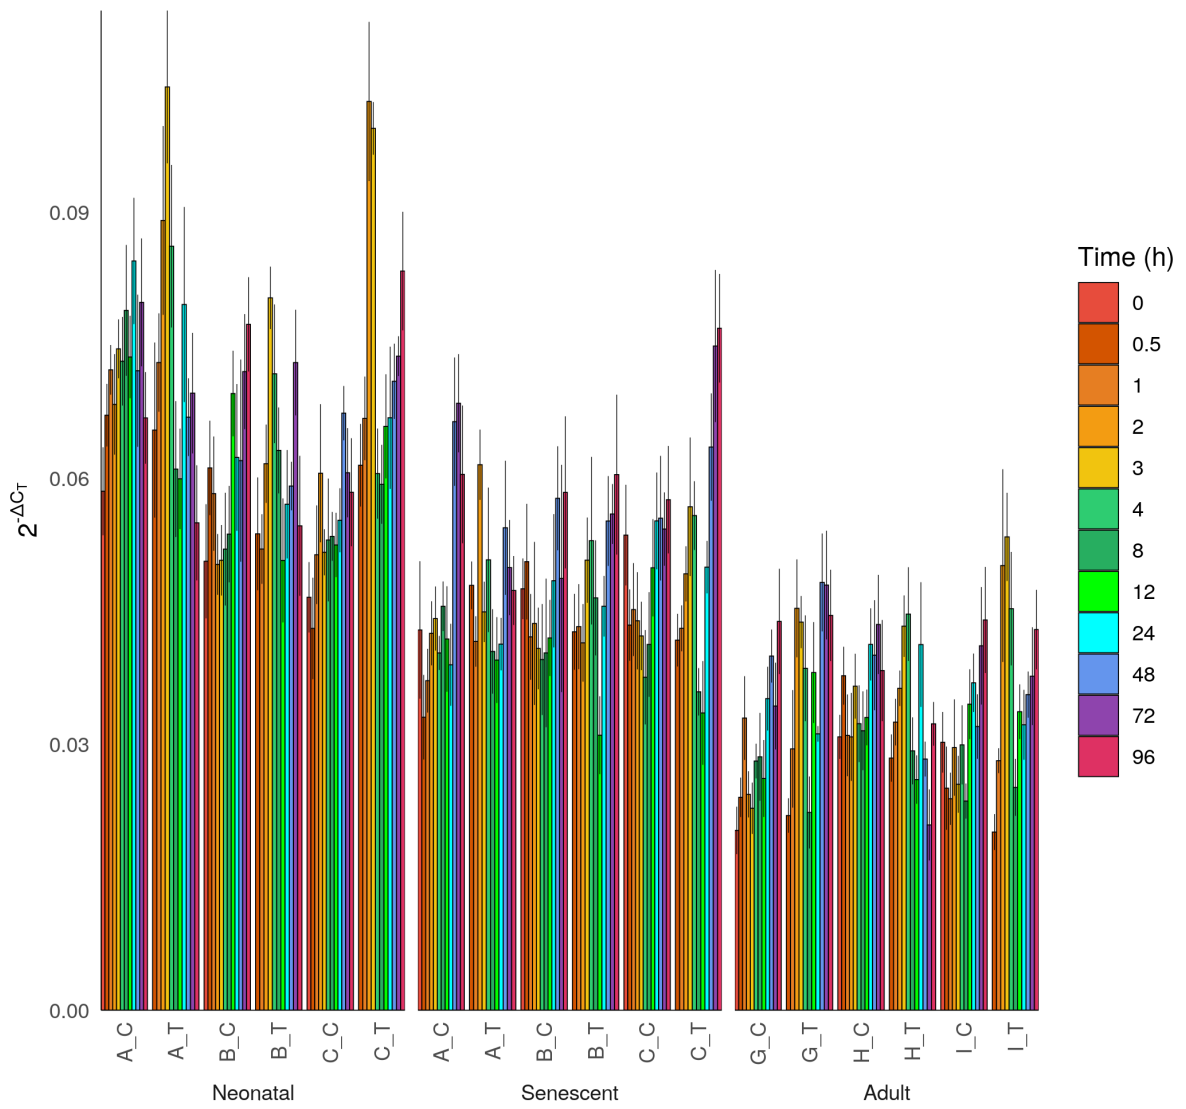

# FBLN1

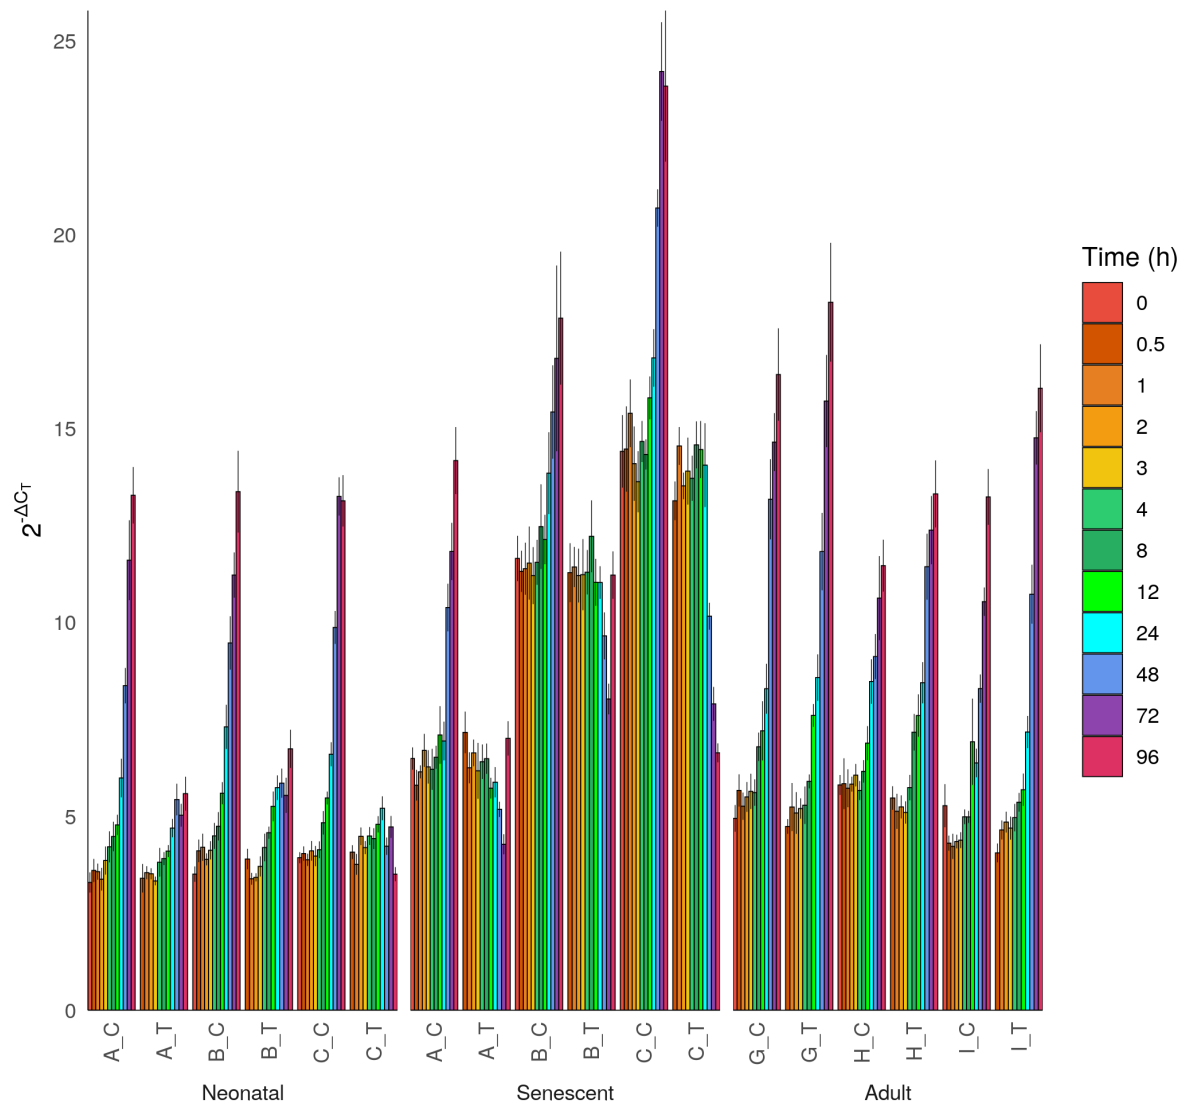

FBN1

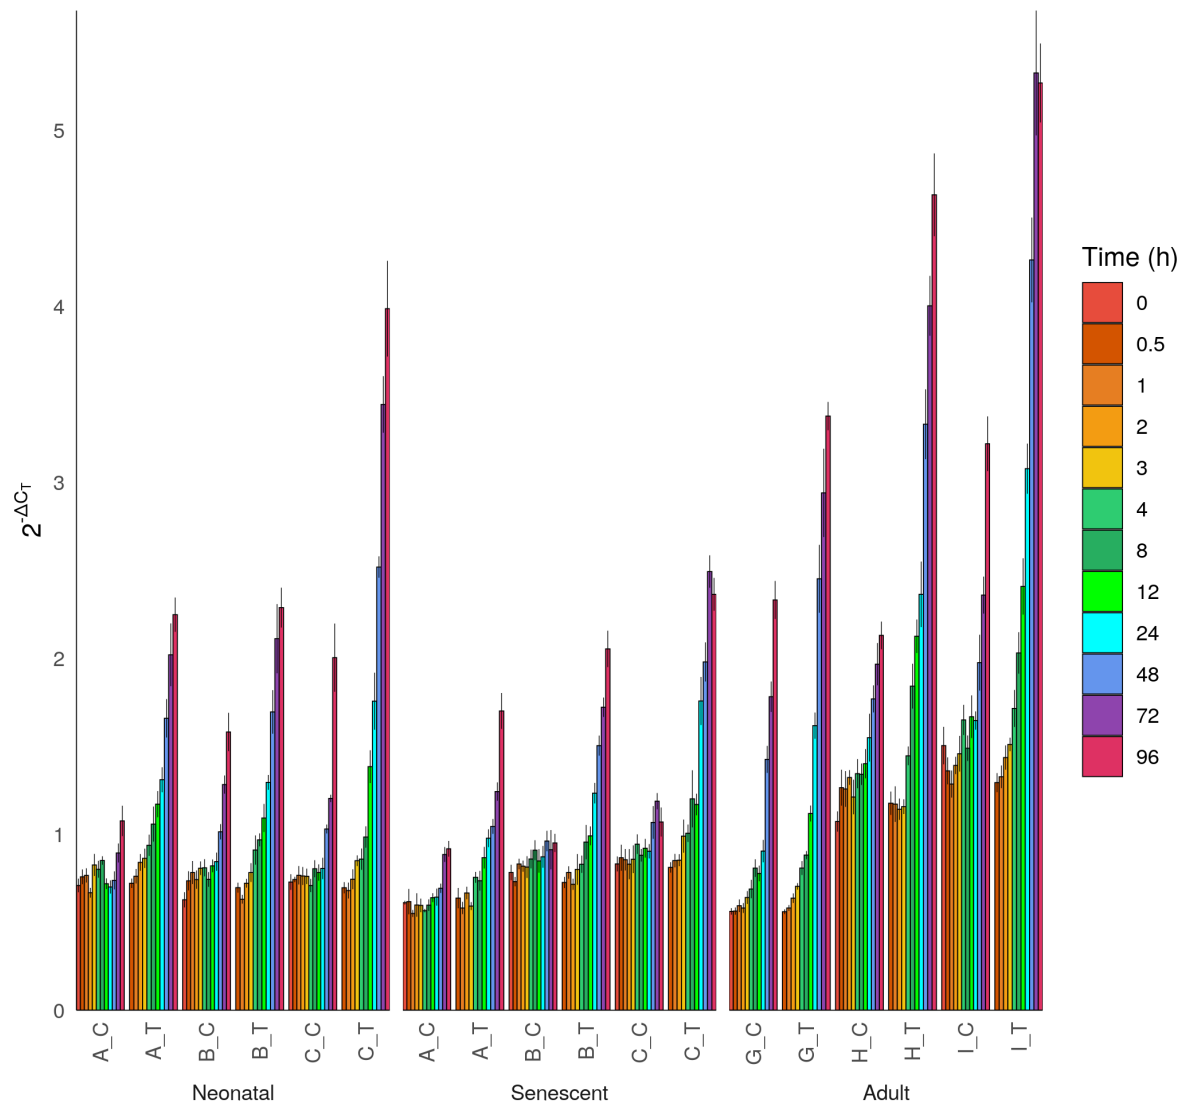

FN1

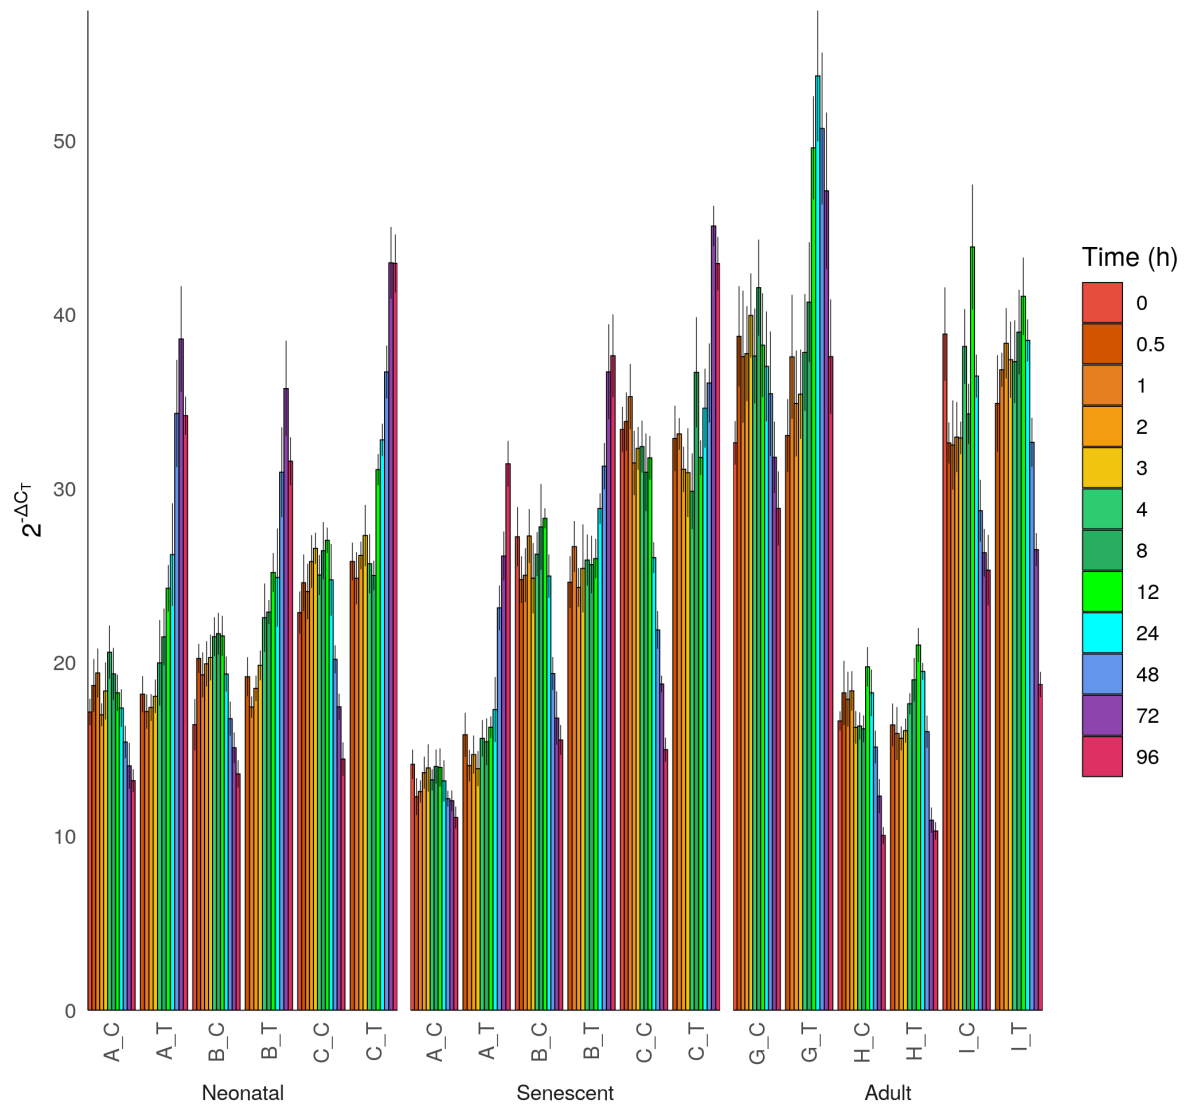

GADD45B

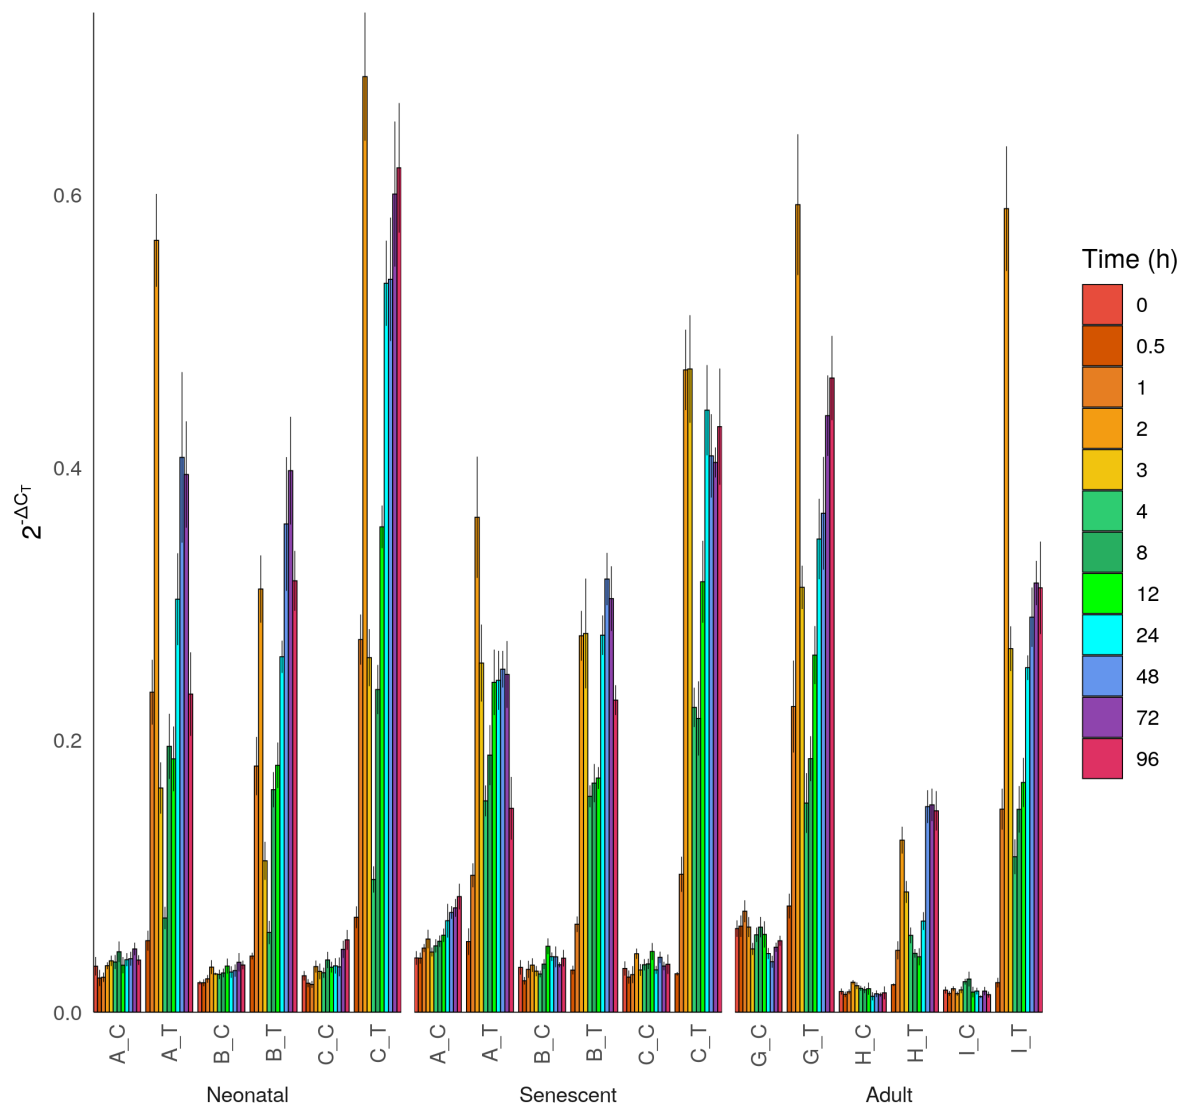

# HAS2

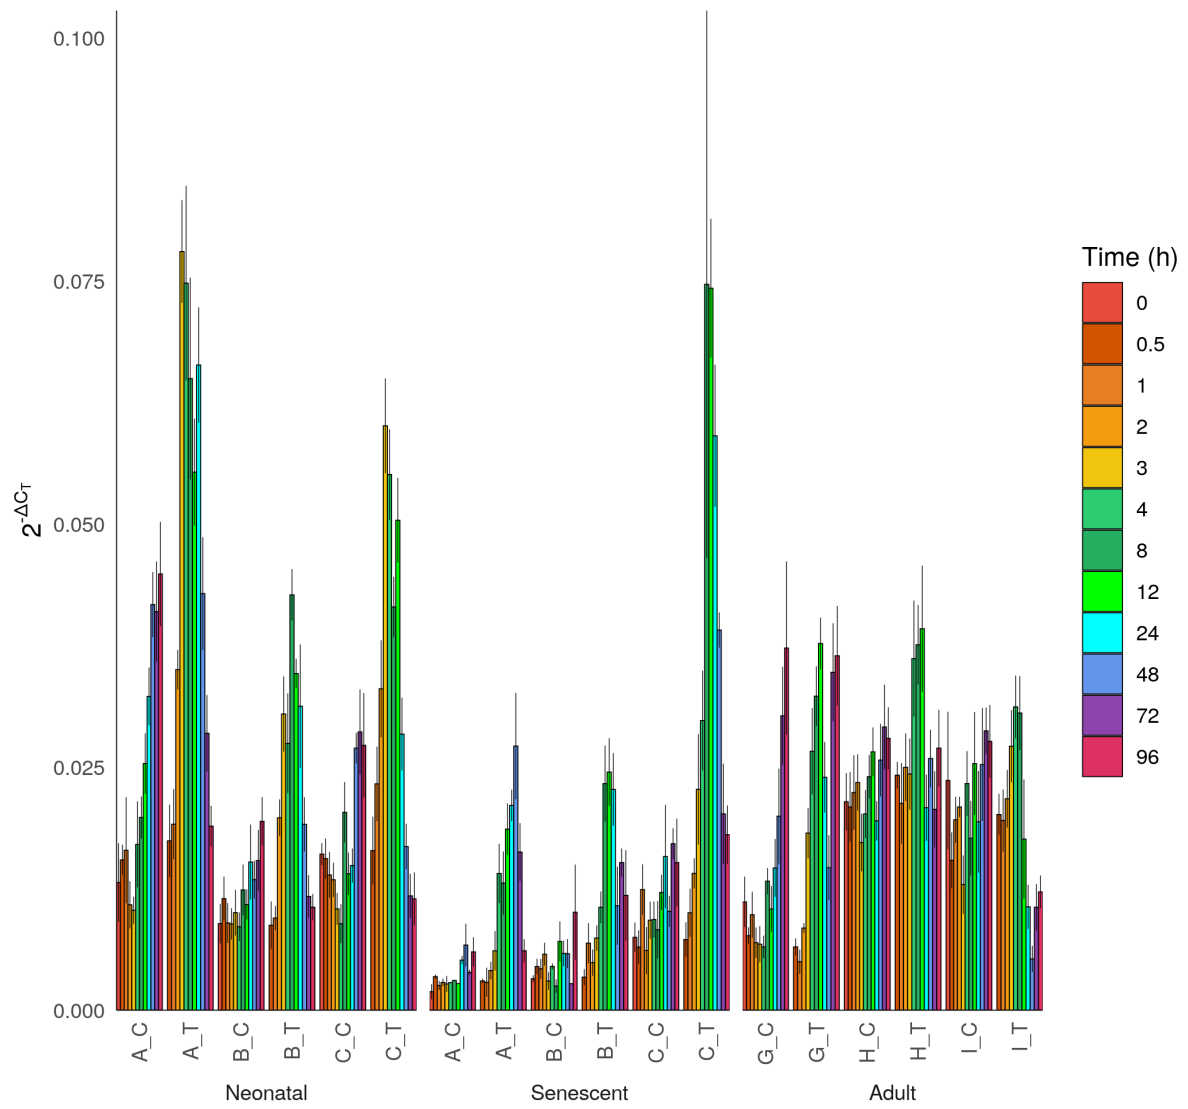



ID1

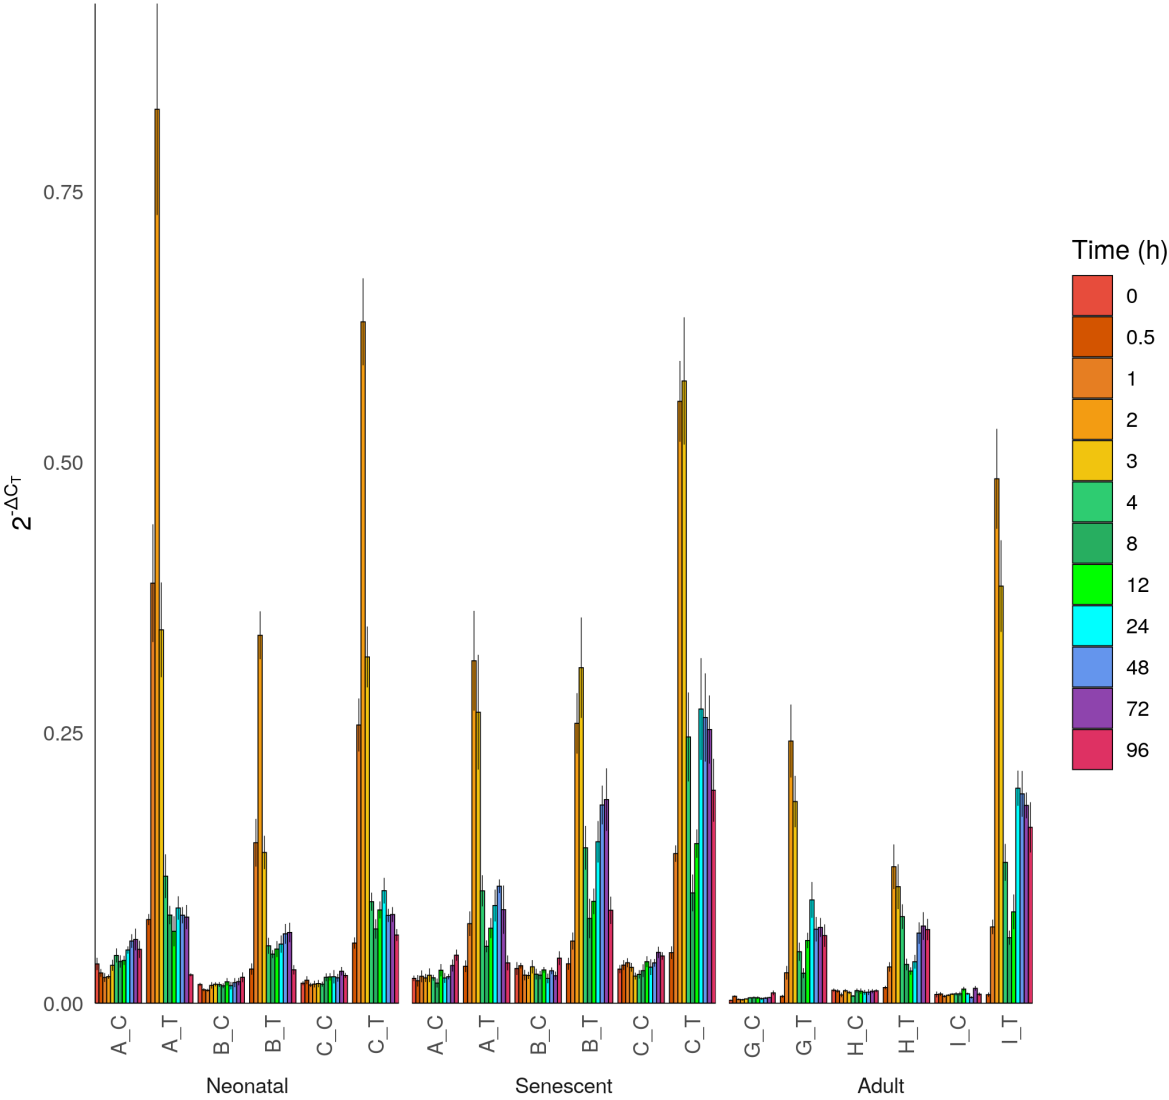

IL6

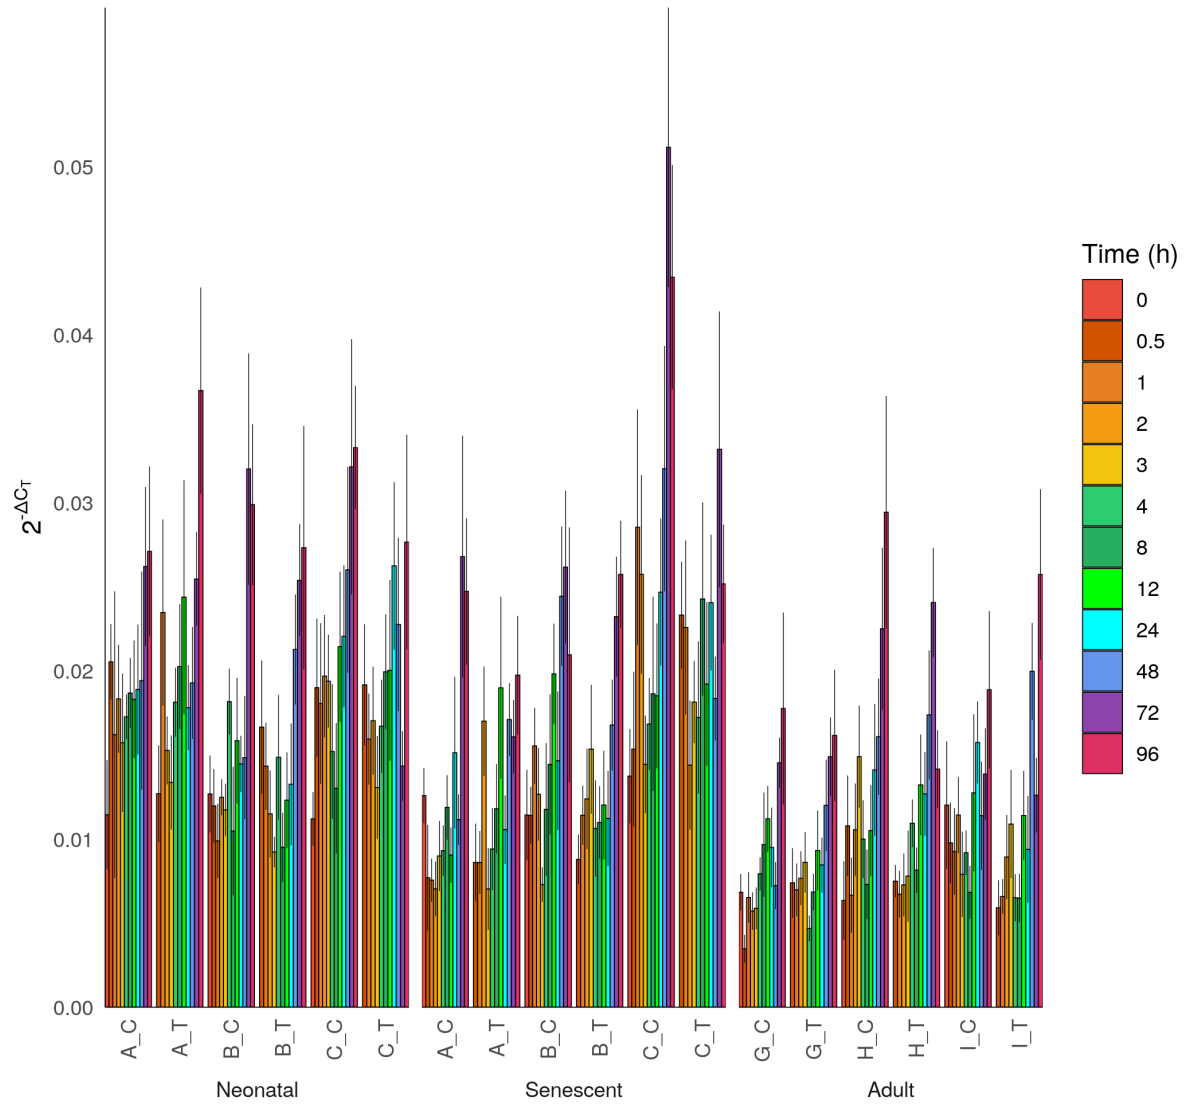

# ITGA1

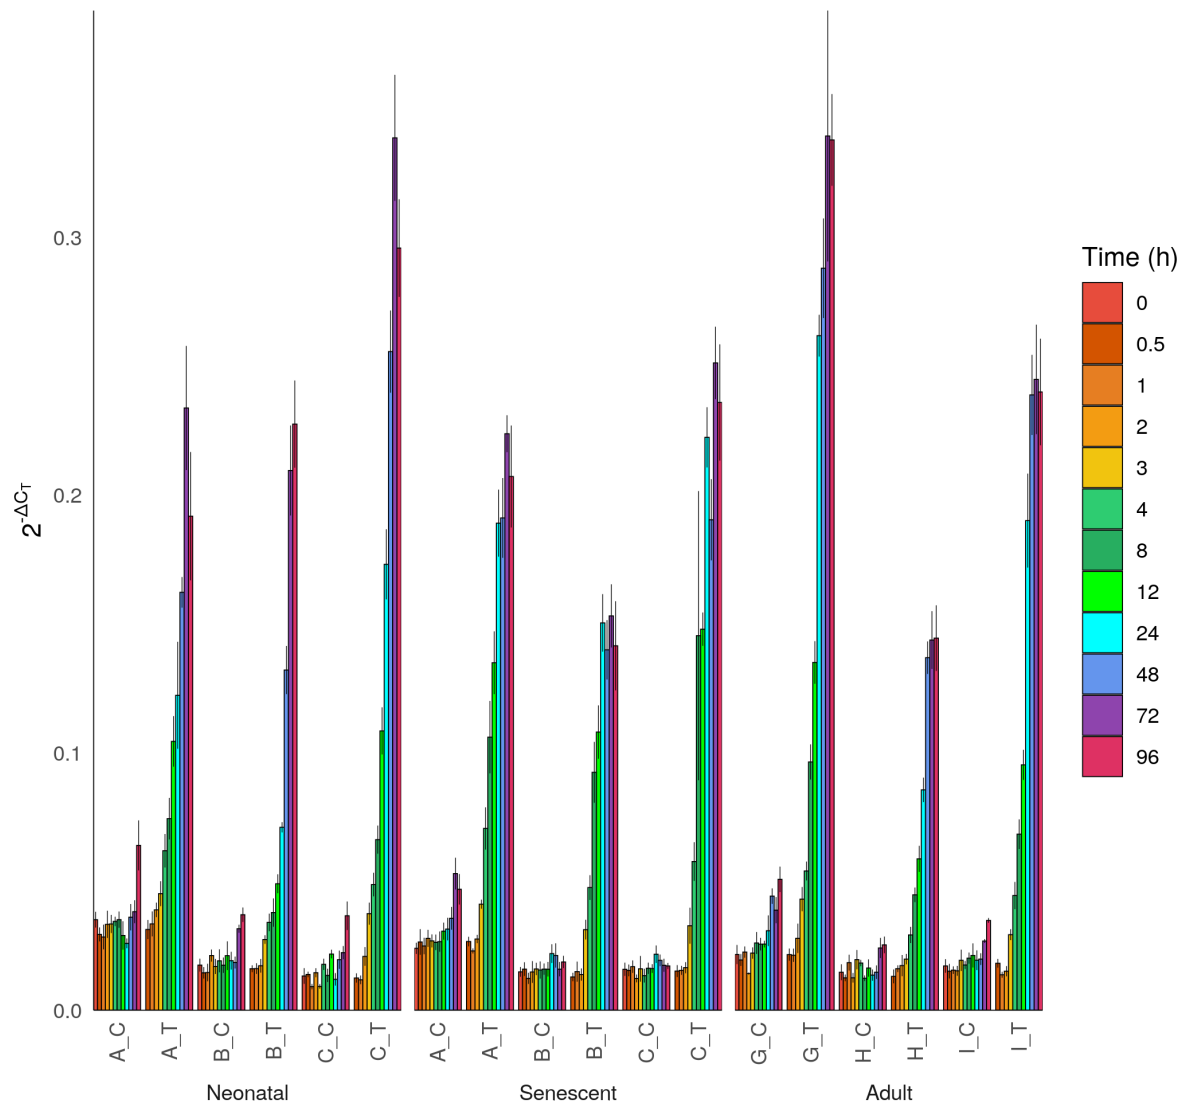

ITGA2

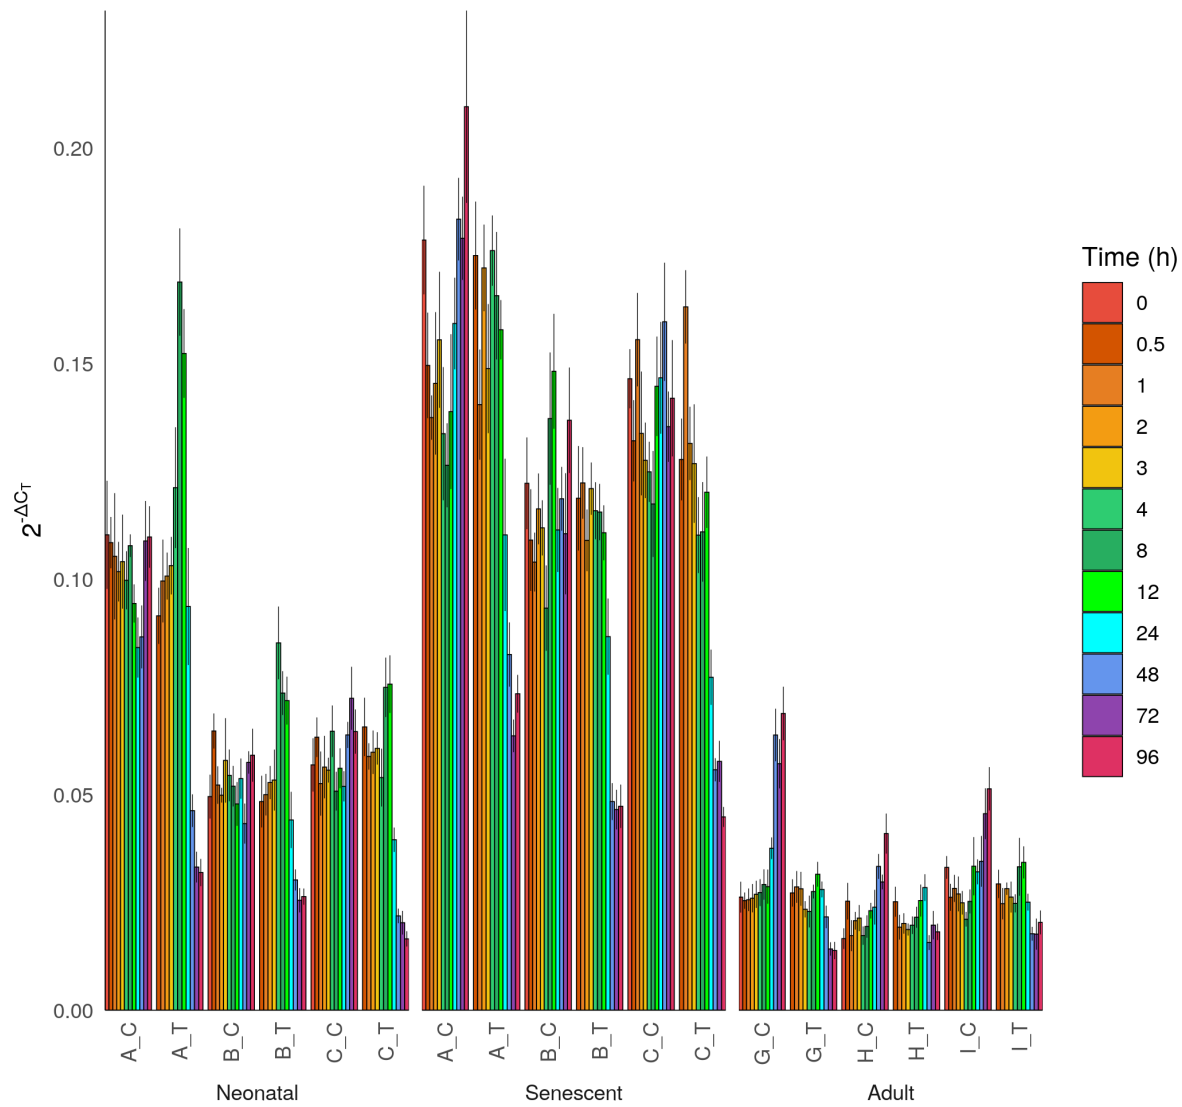

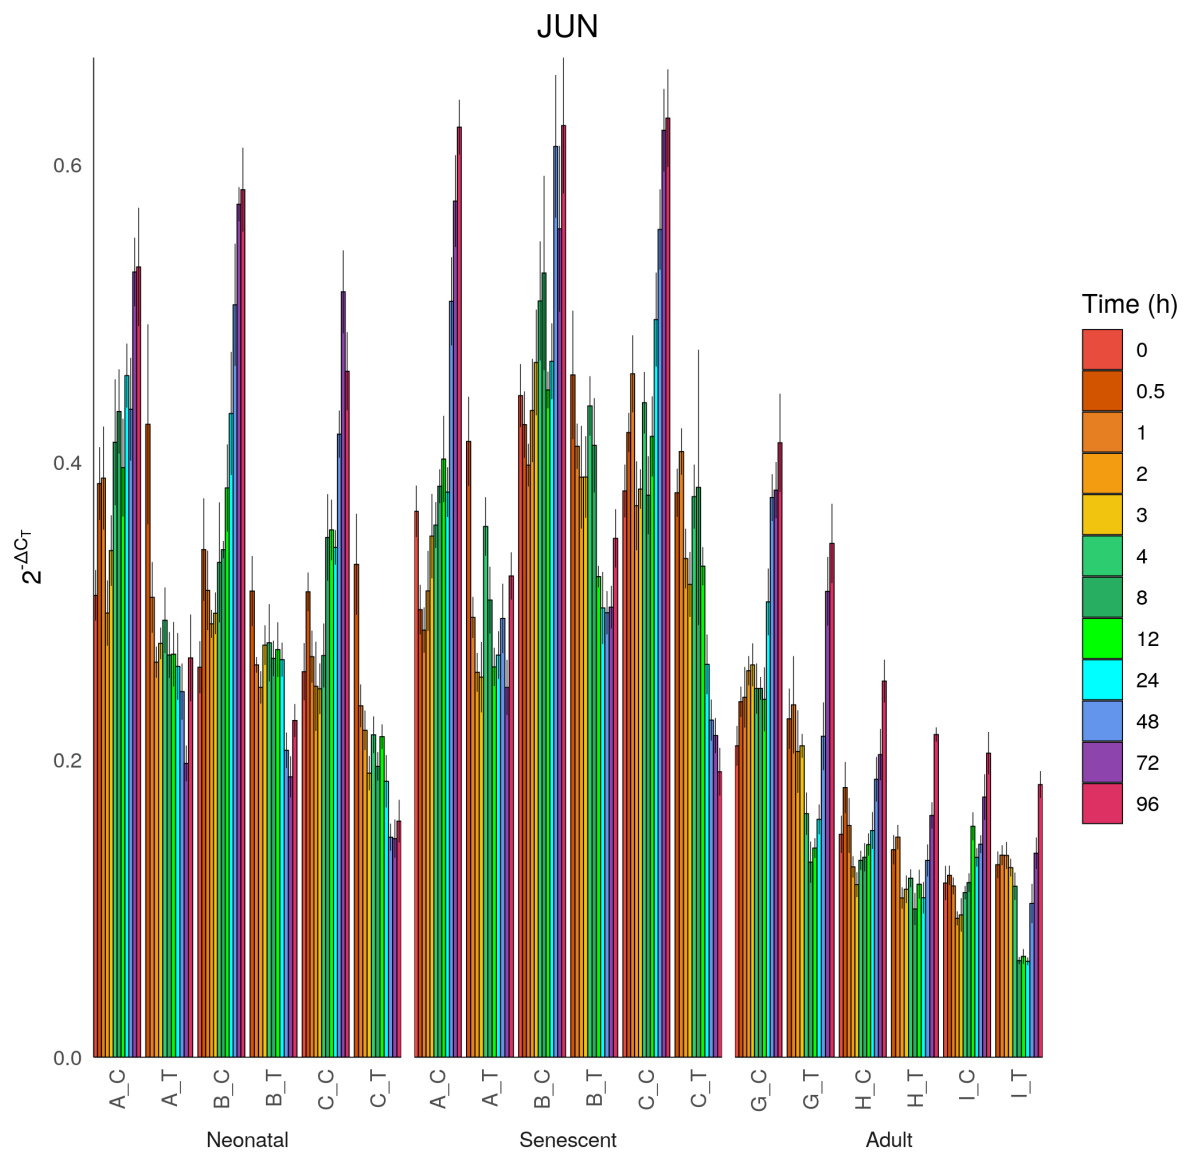

JUNB

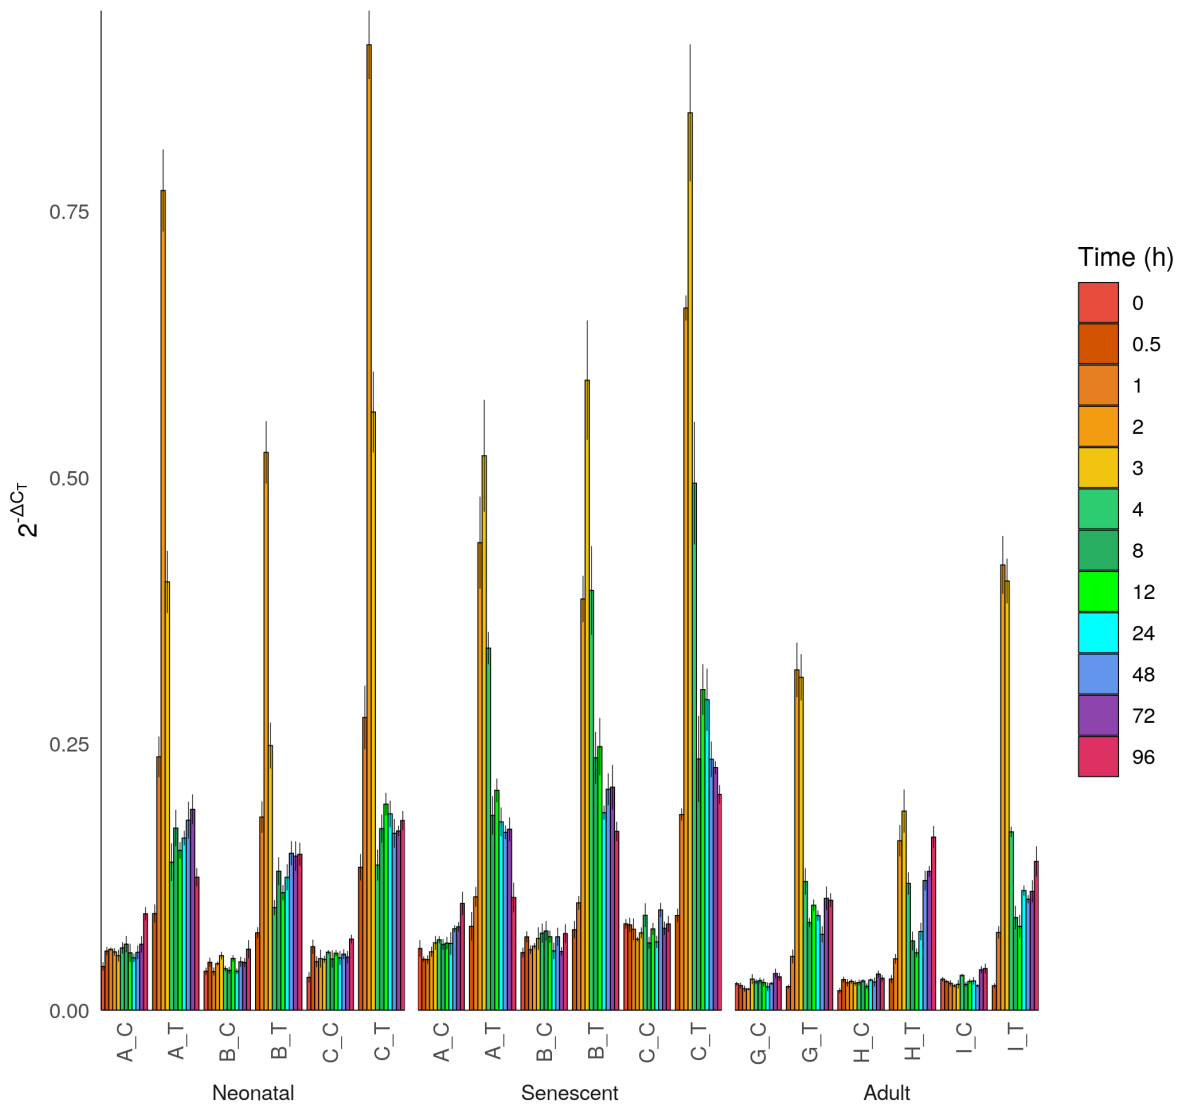

LARP6

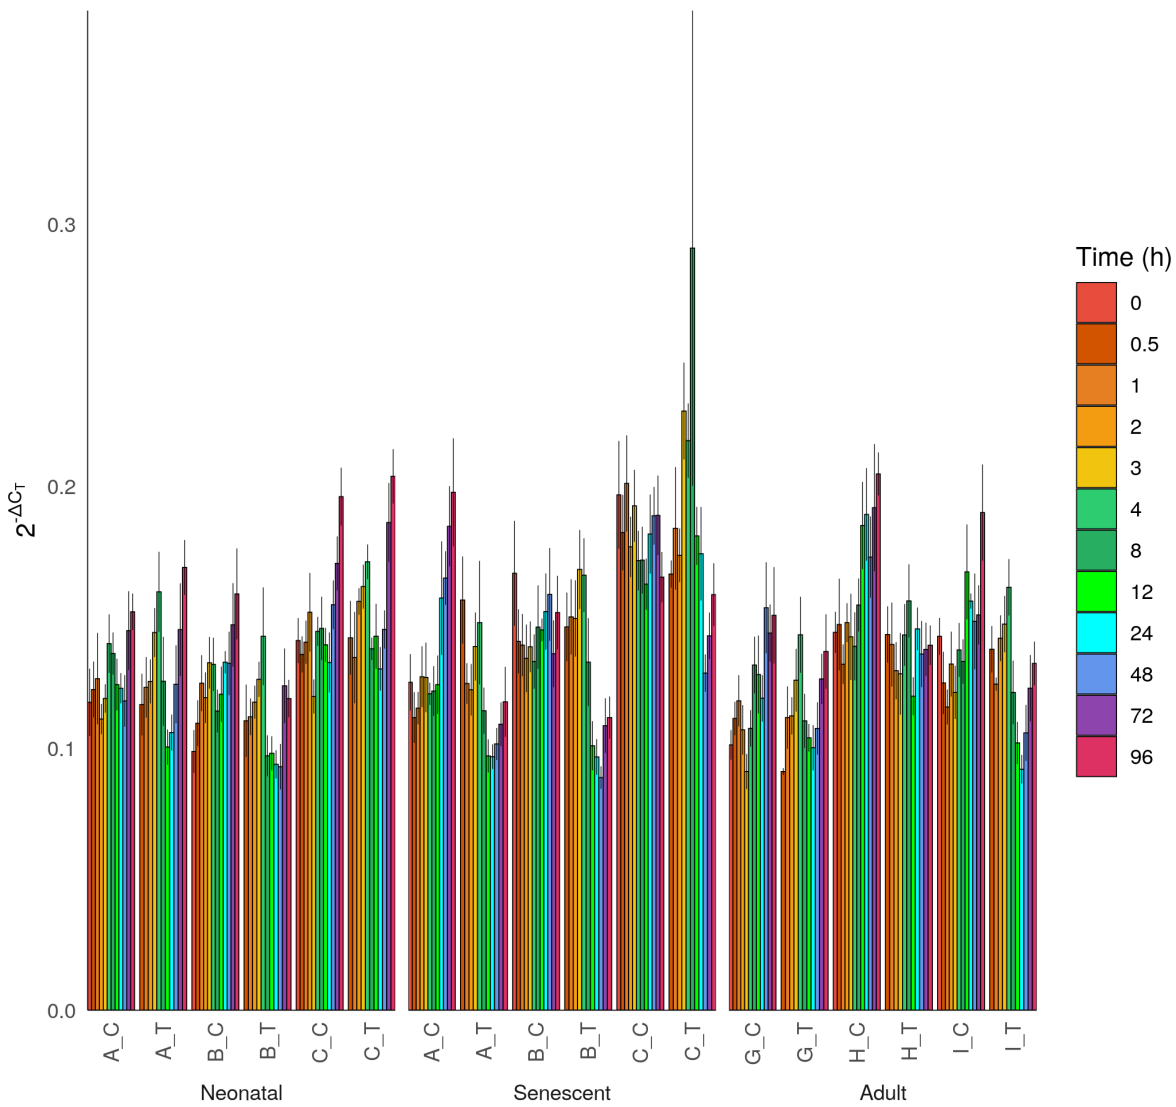

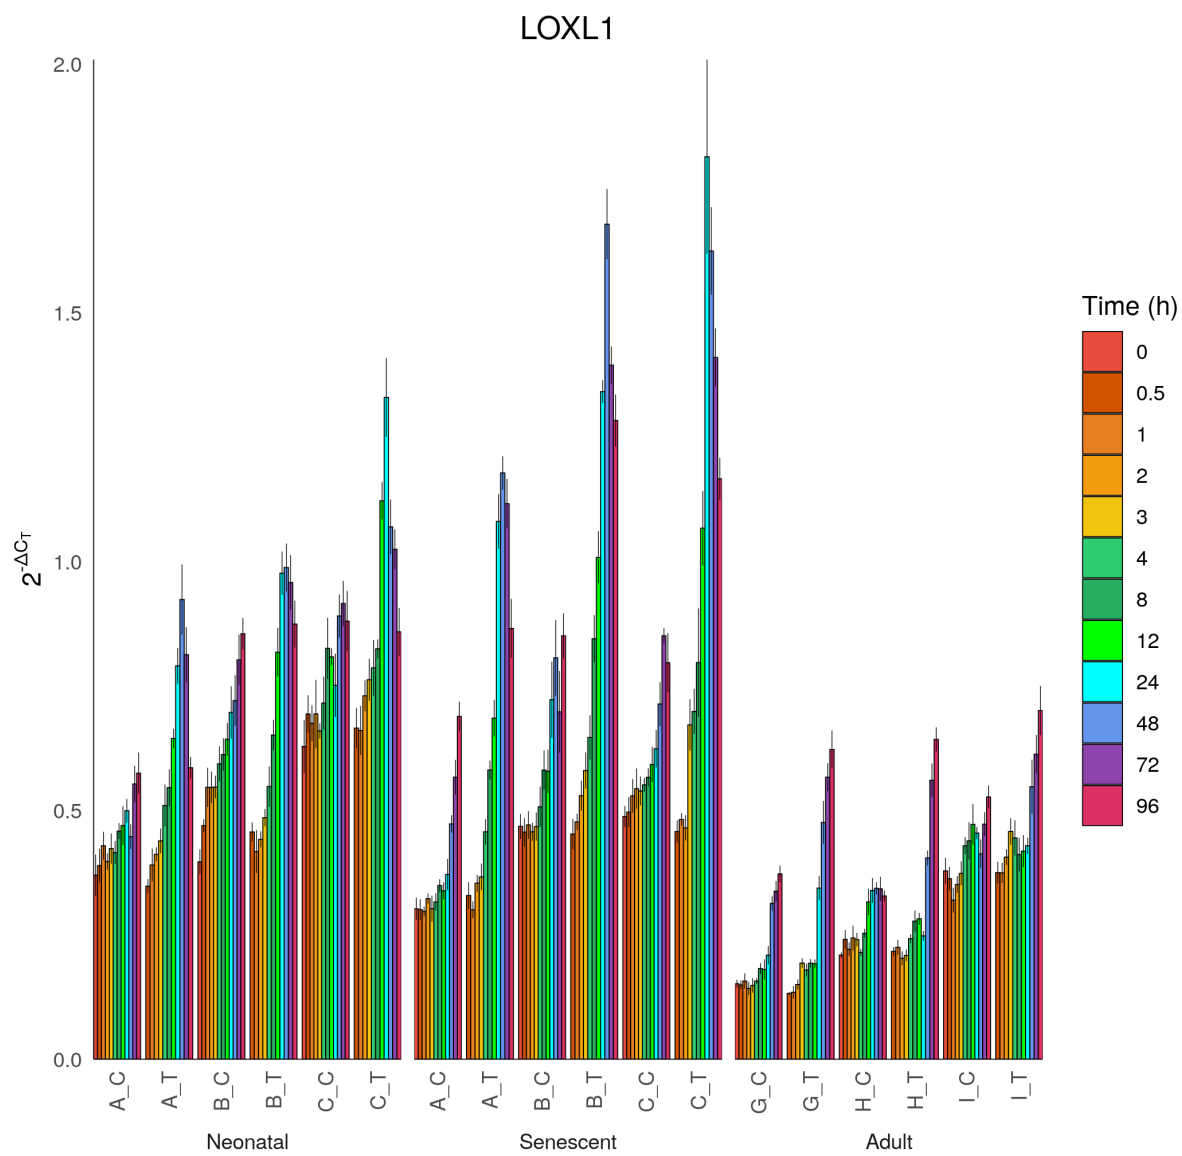



## LOXL2

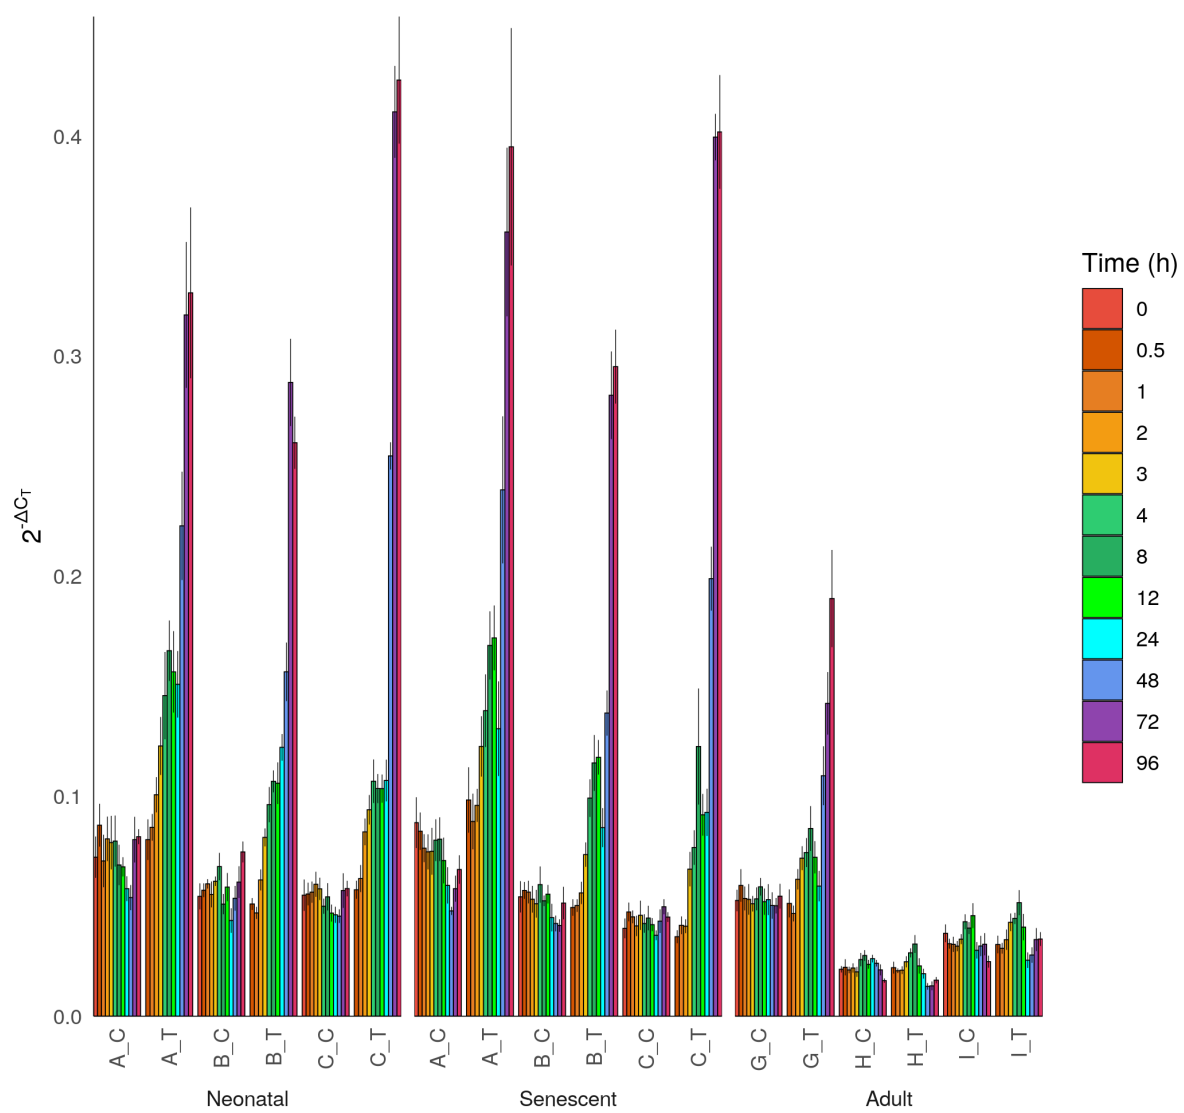

## LTBP2

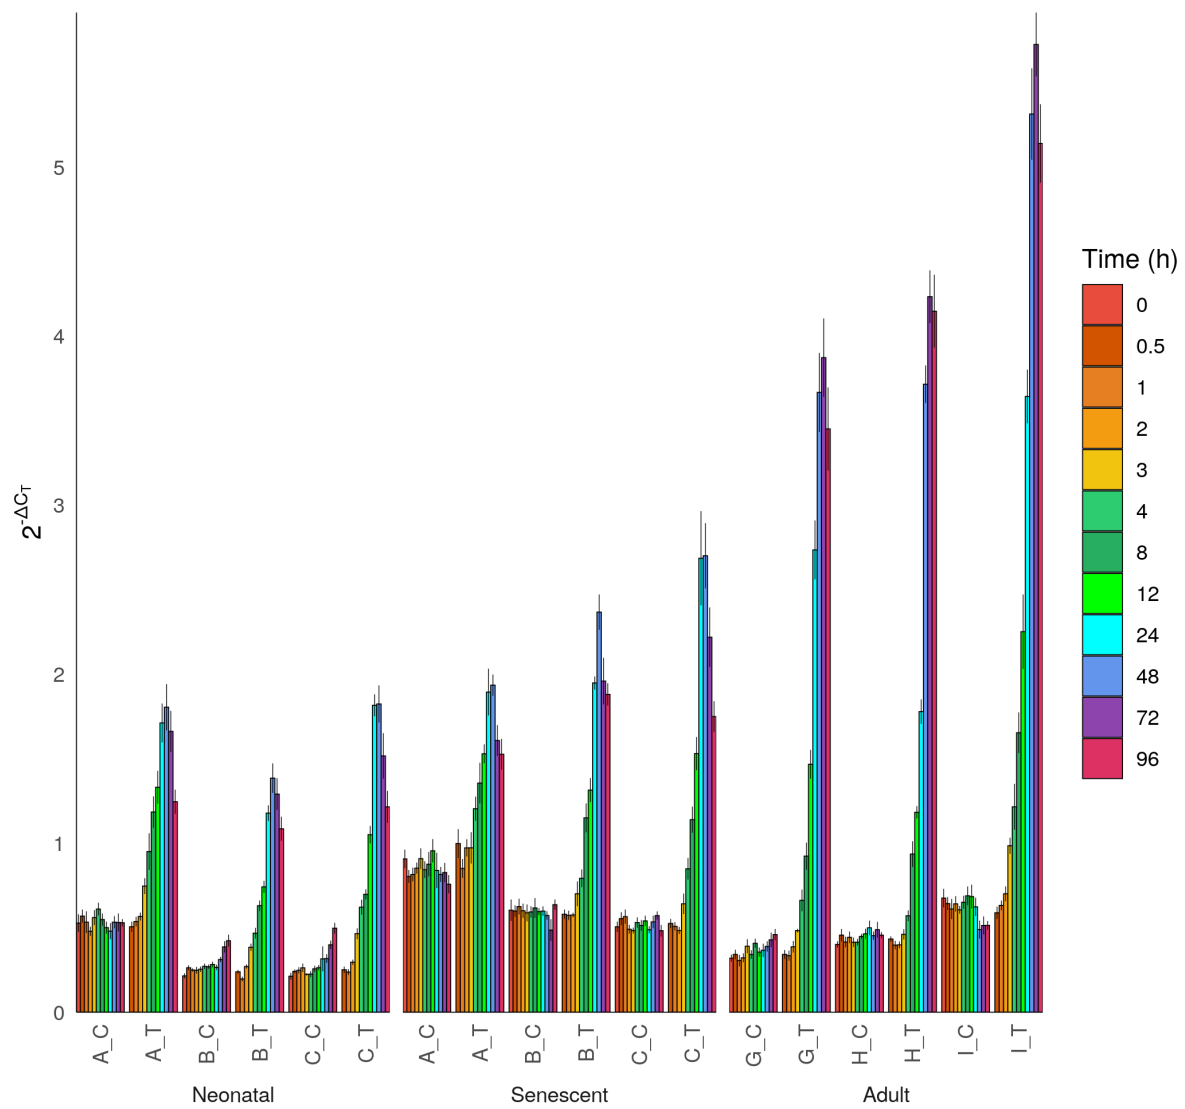

MMP1

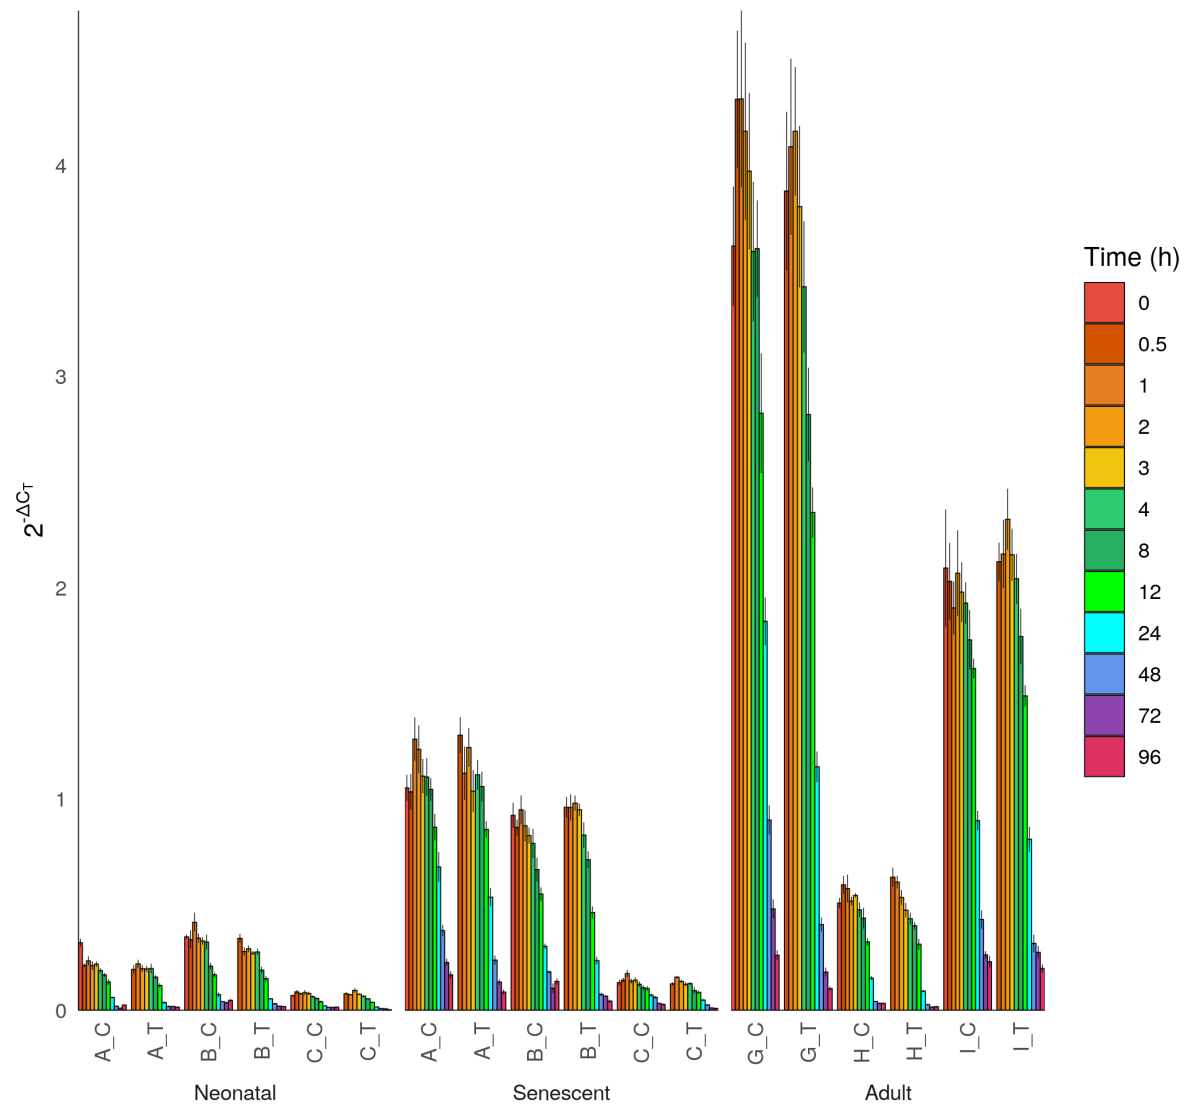

MMP2

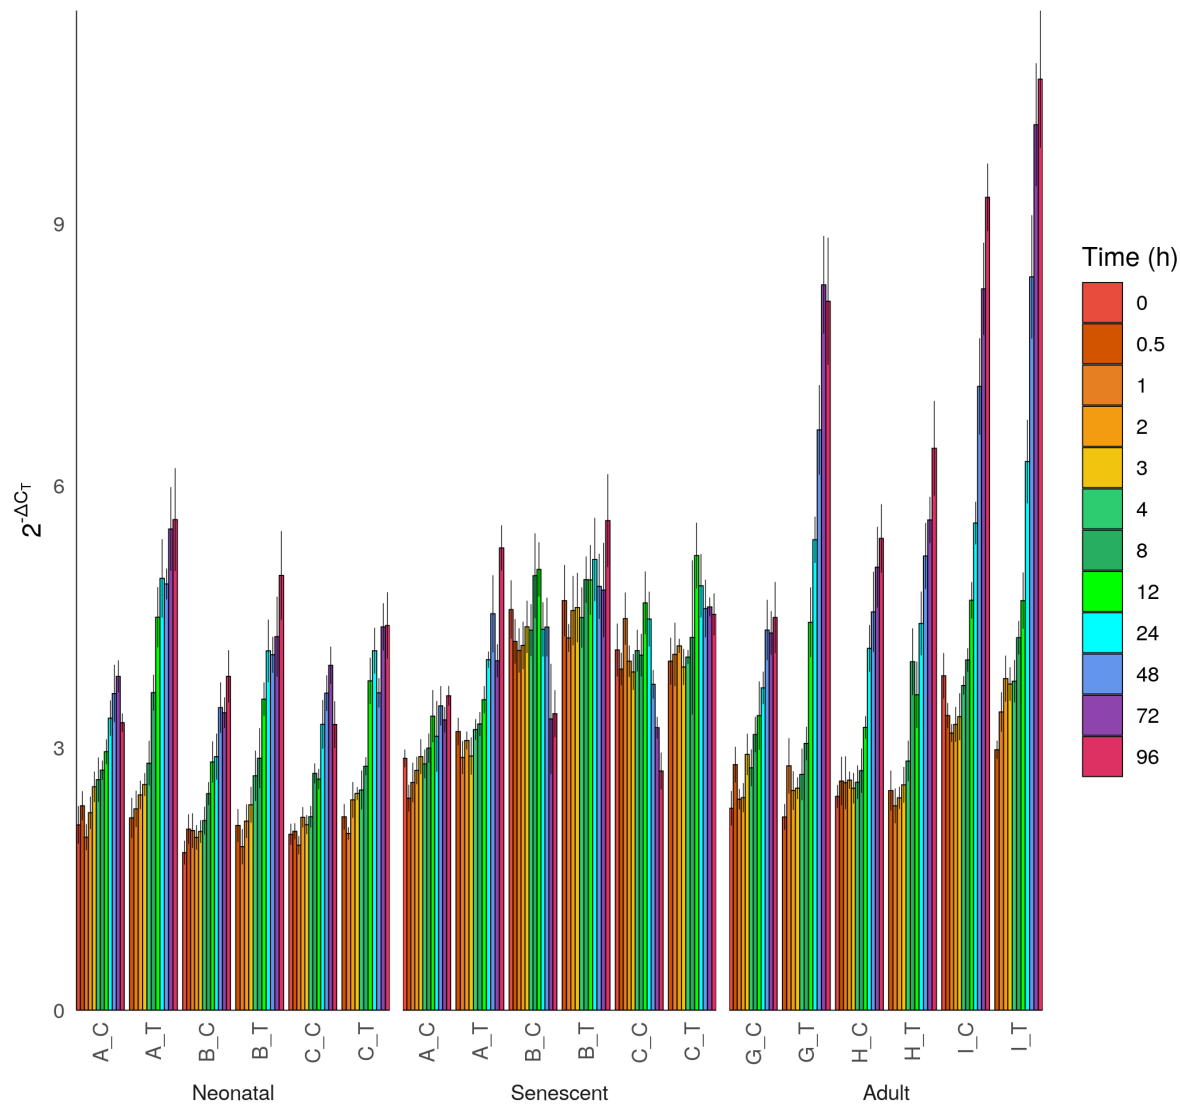

## MMP14

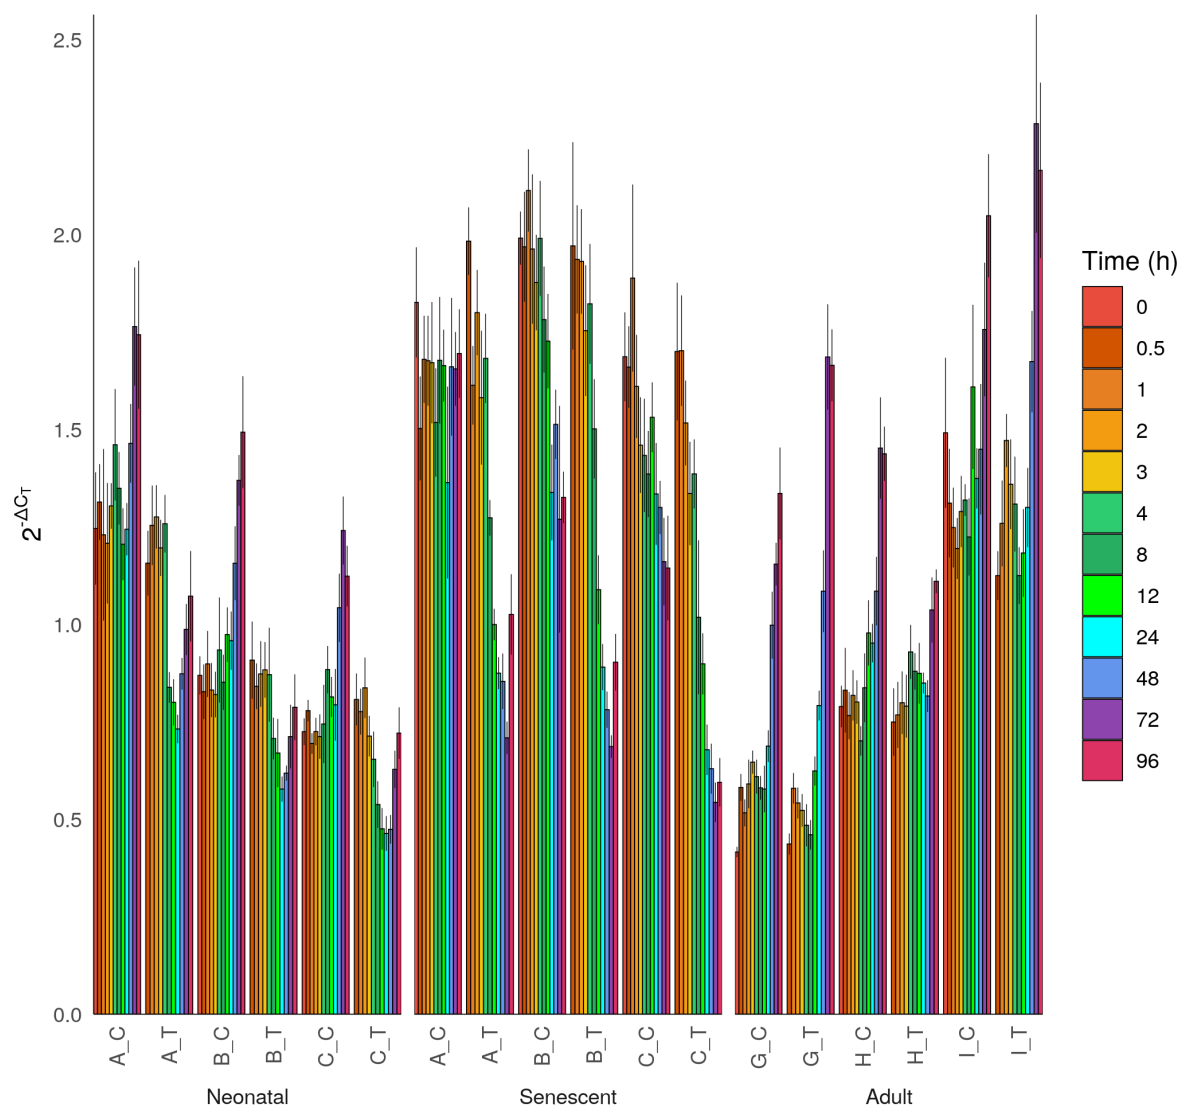

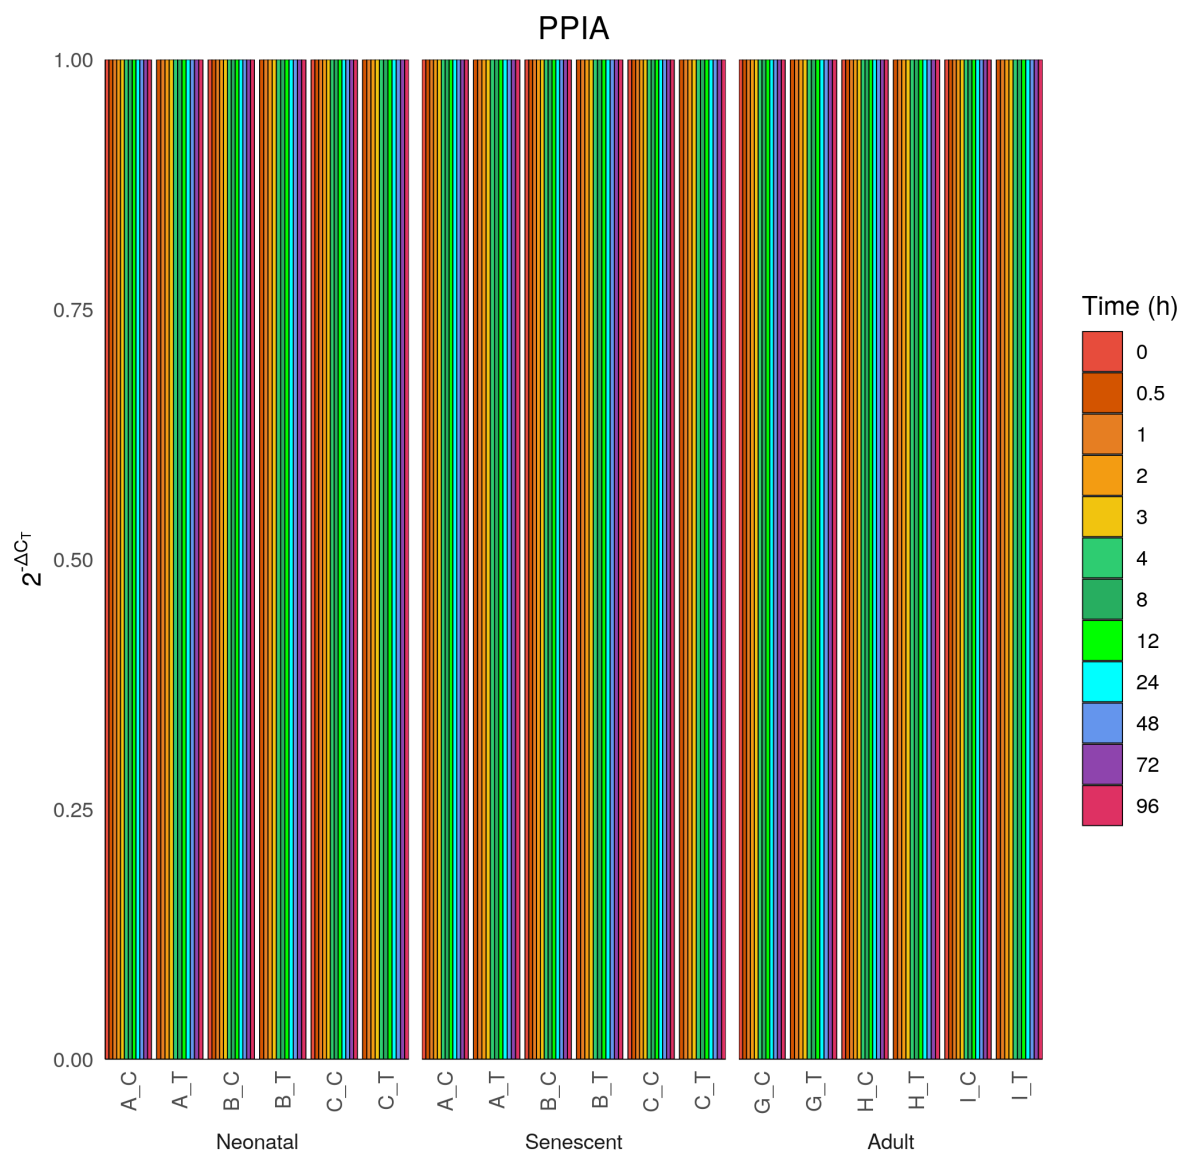

# PPP3CA

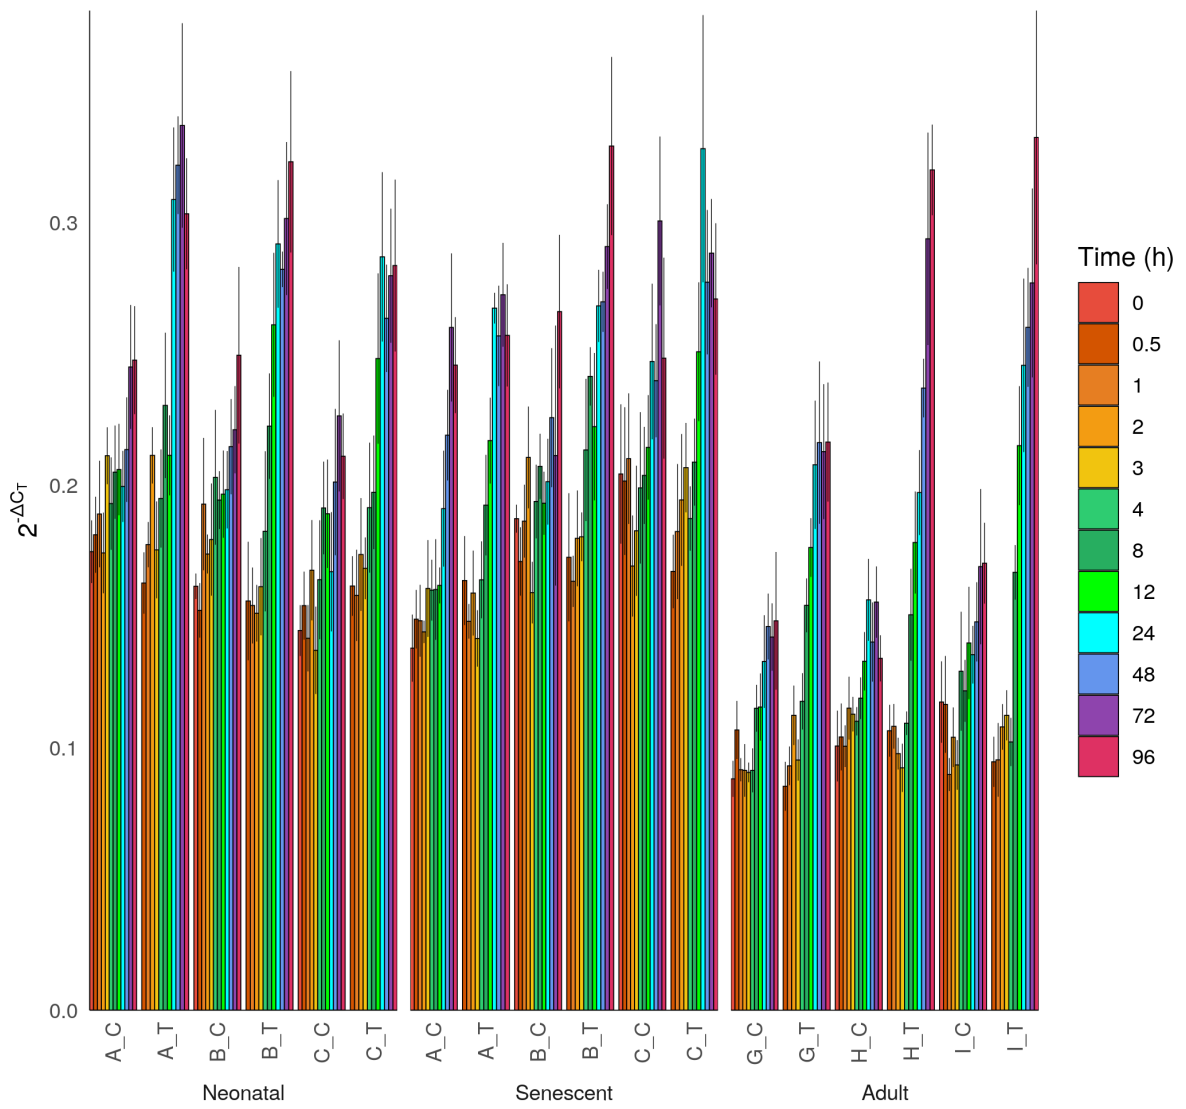

PSMD14

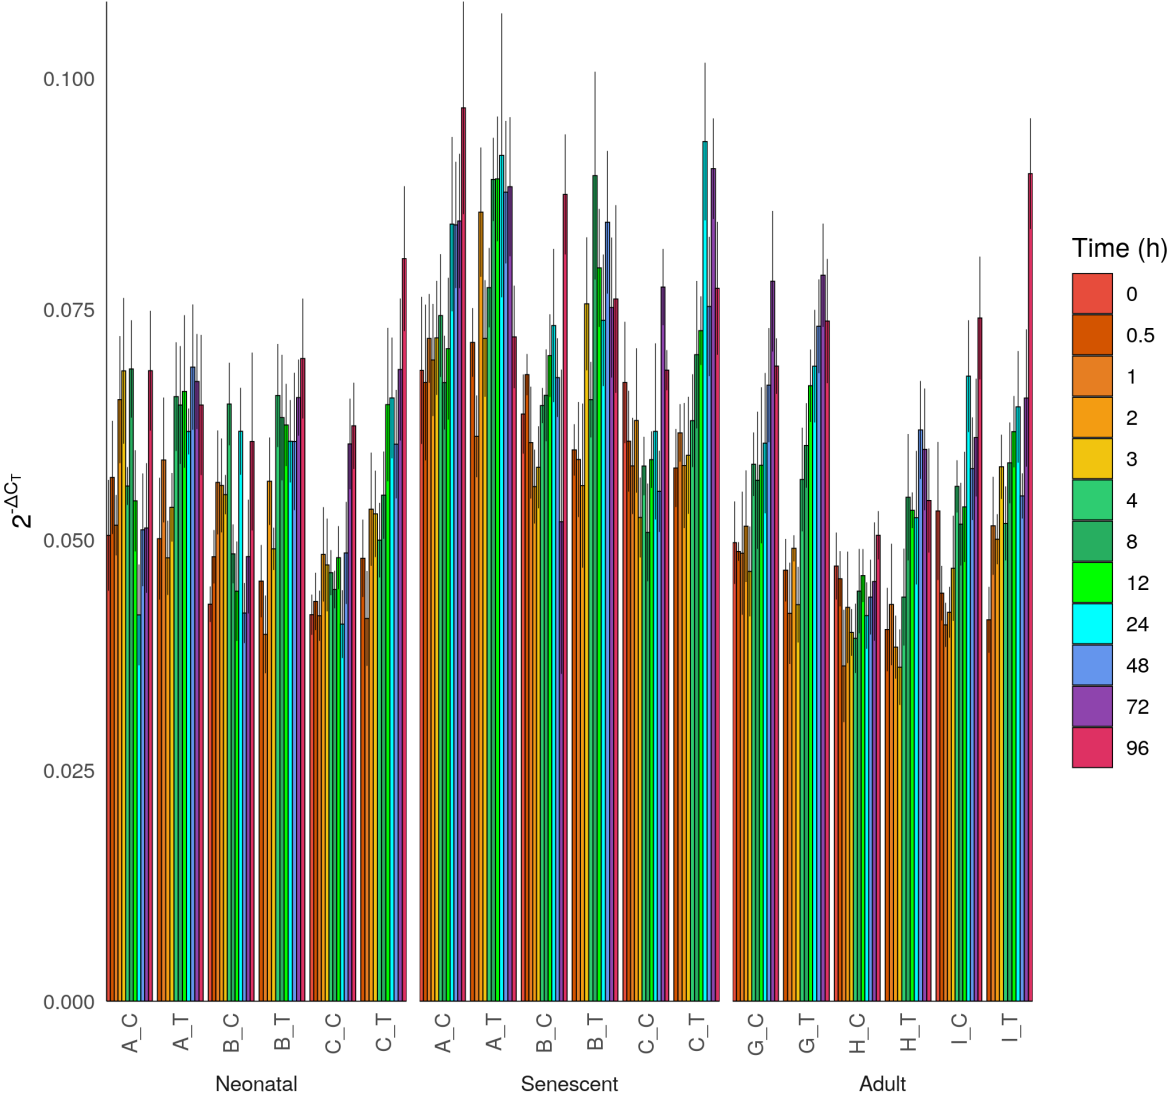



PTEN

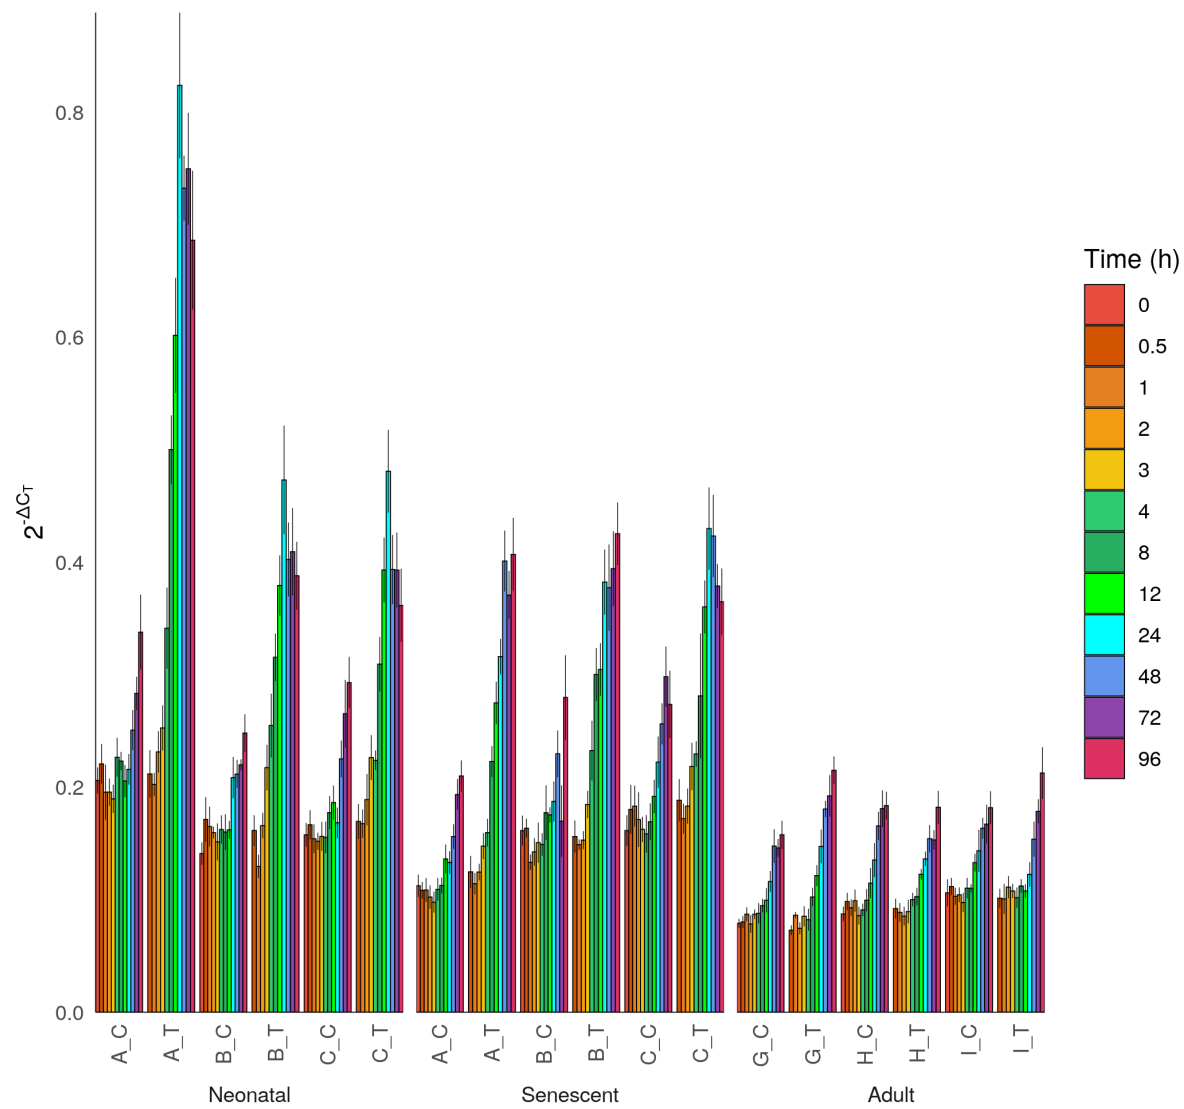

# RARA

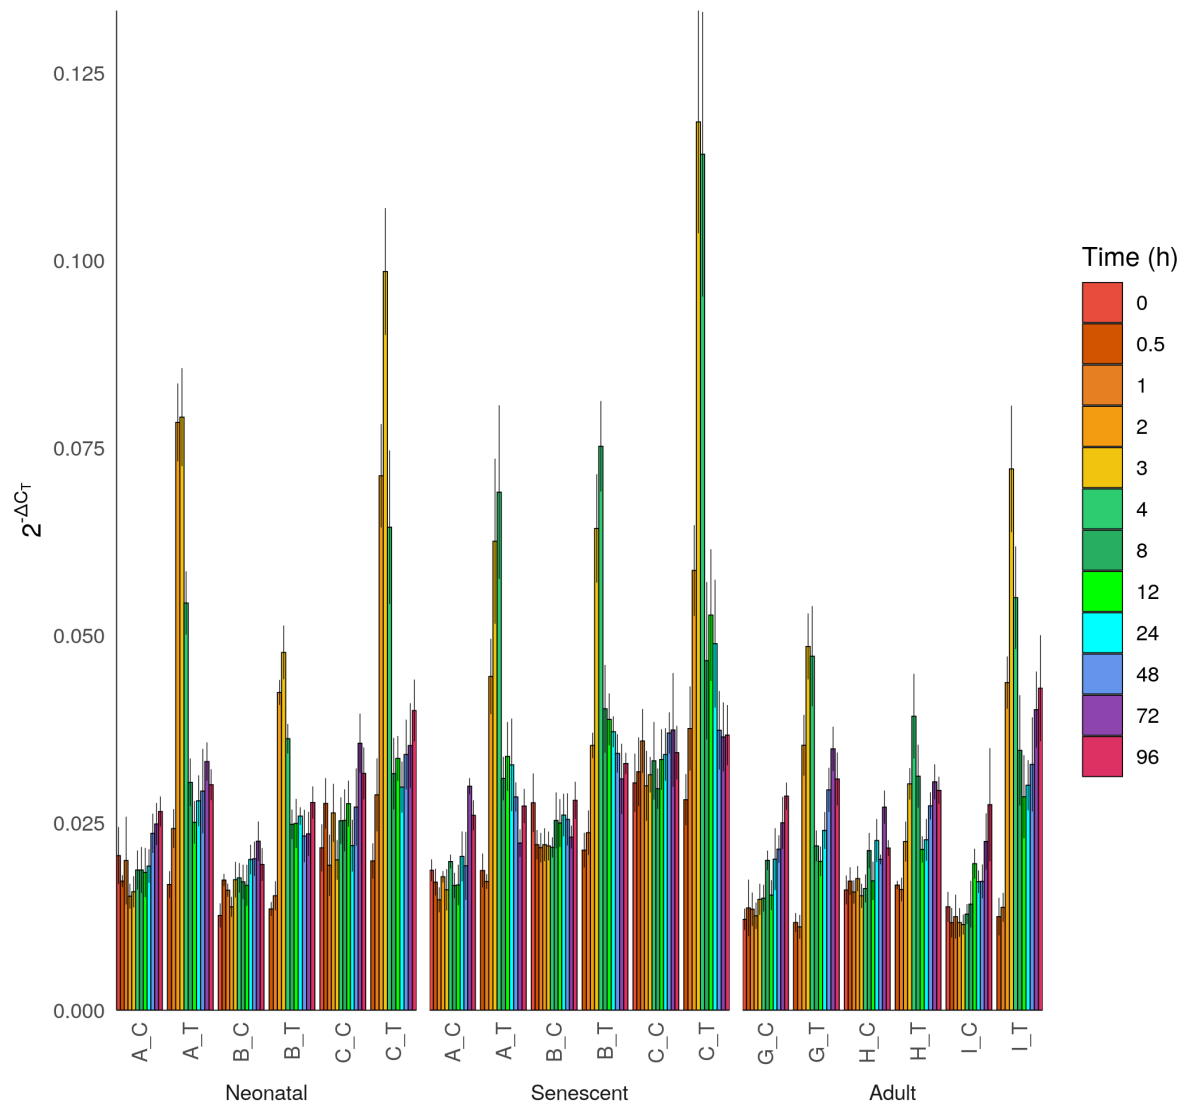

RARG

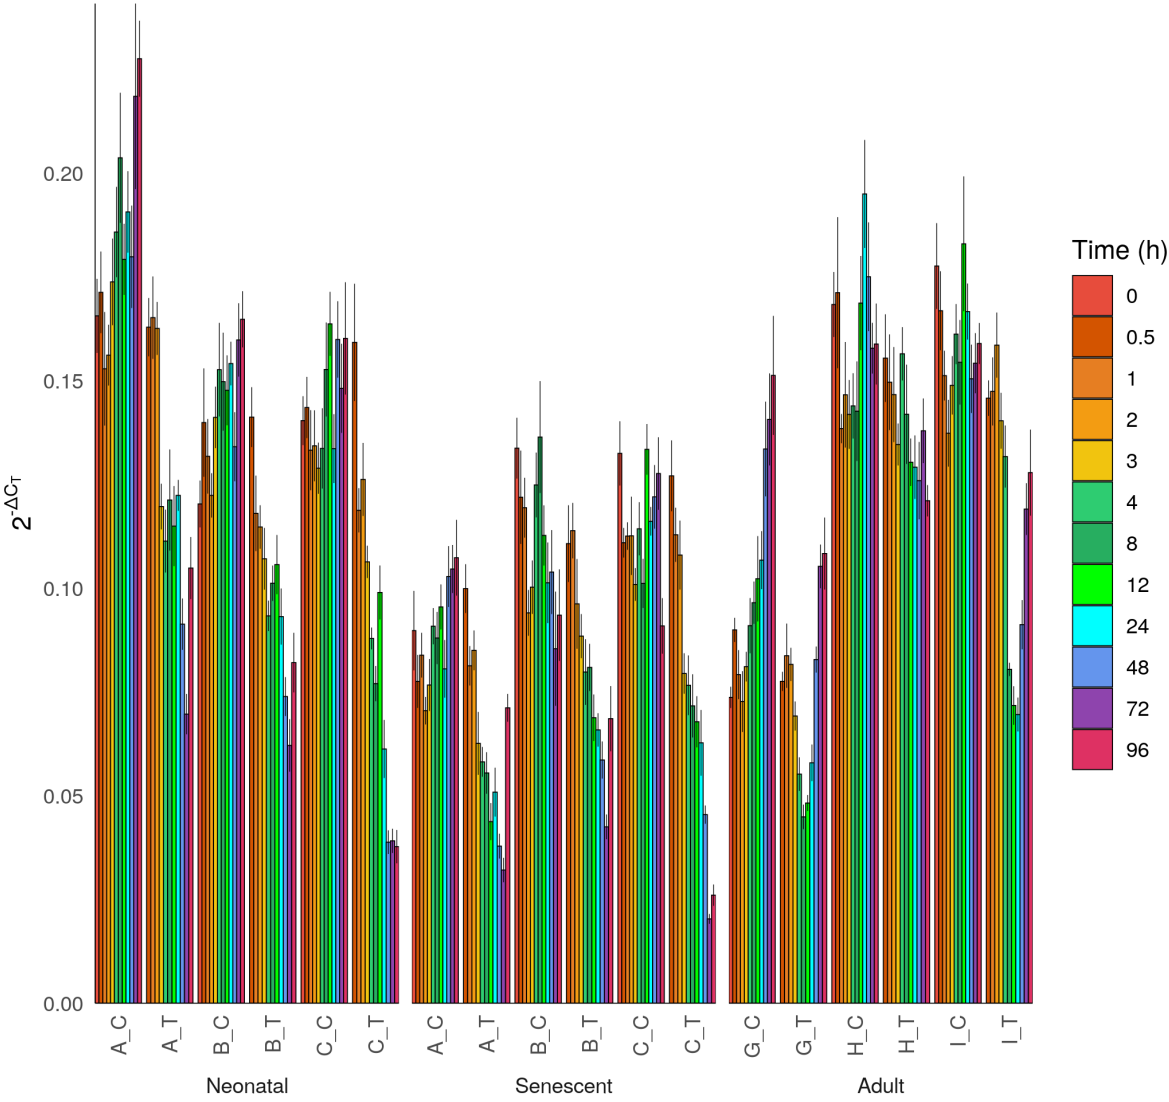

RHOB

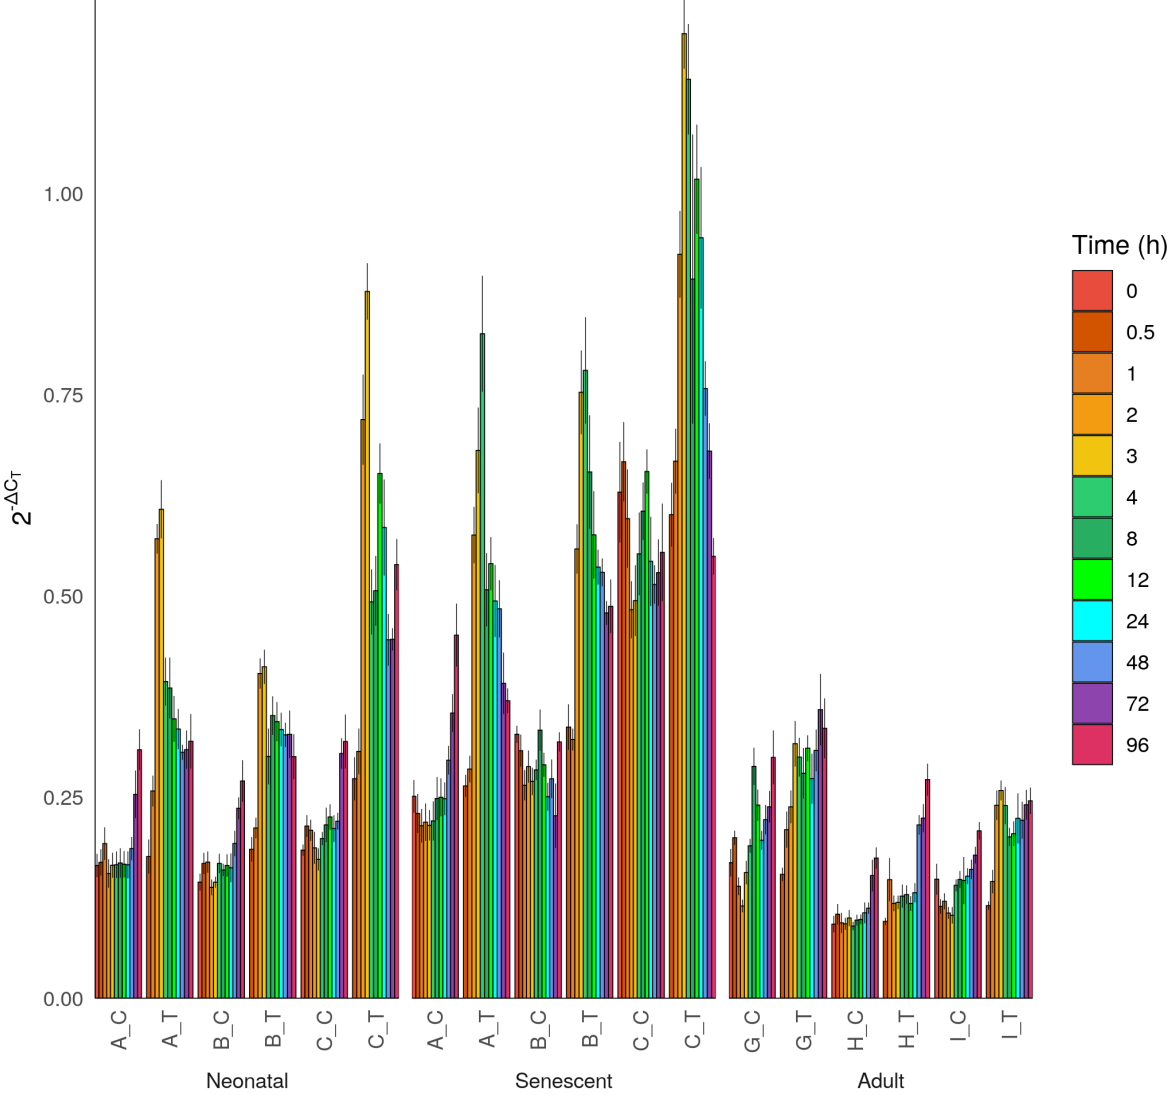

## SERPINE1

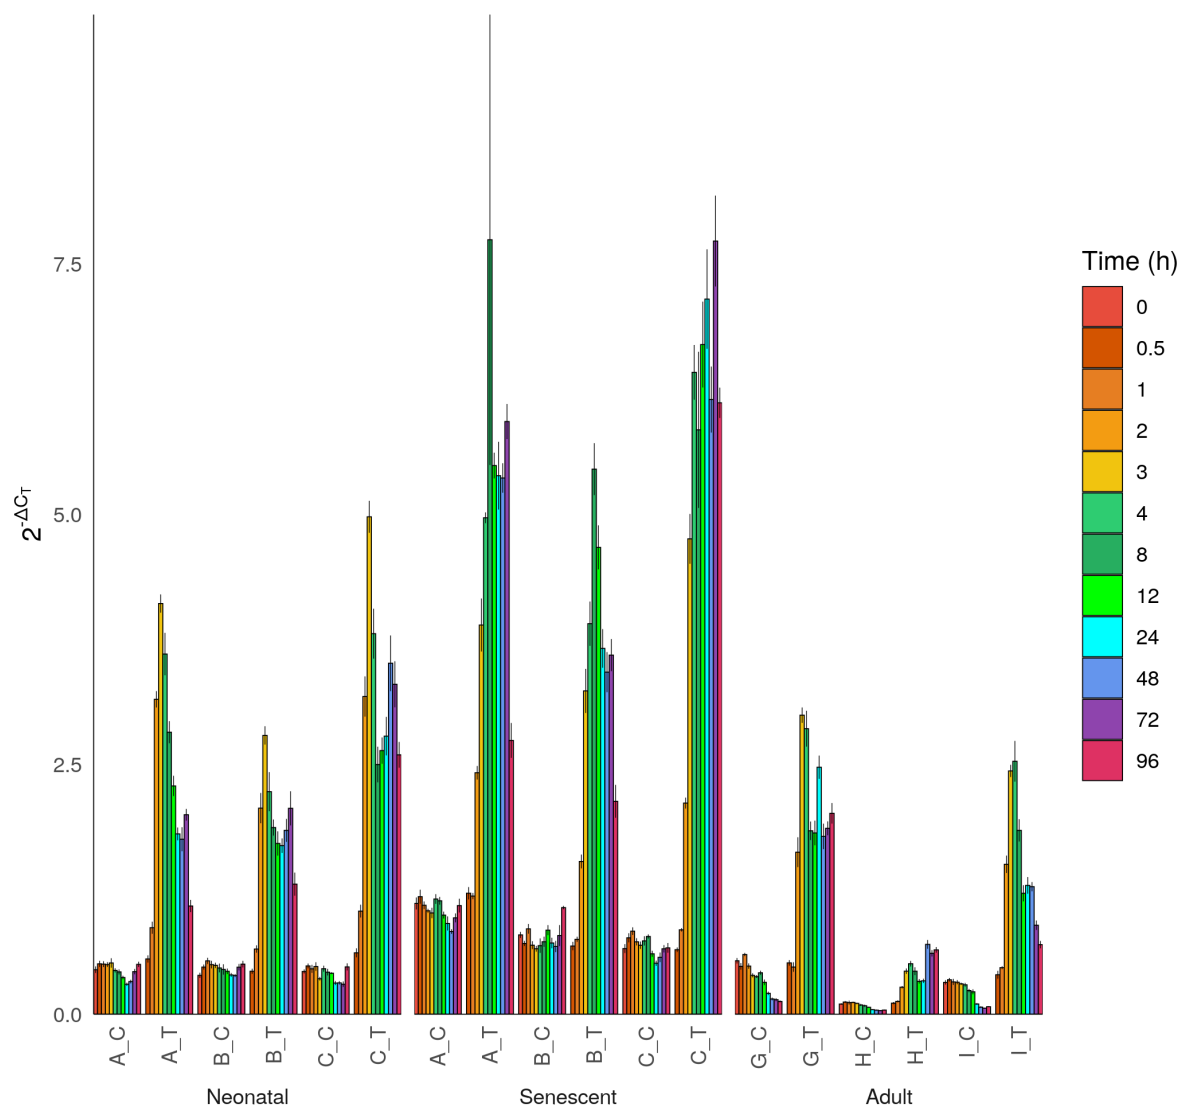

## SERPINE2

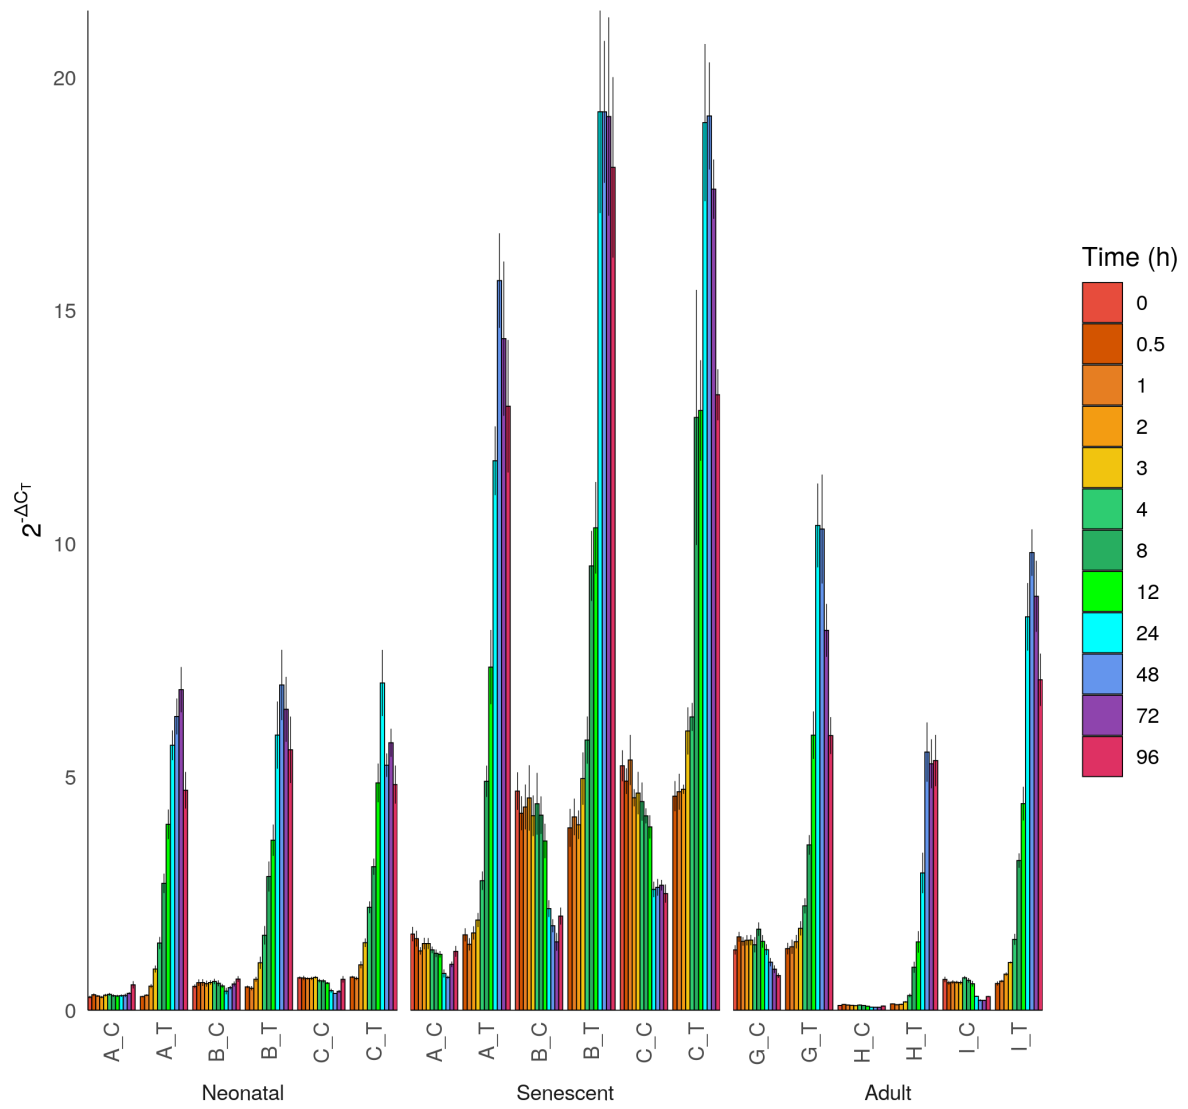

# SKI

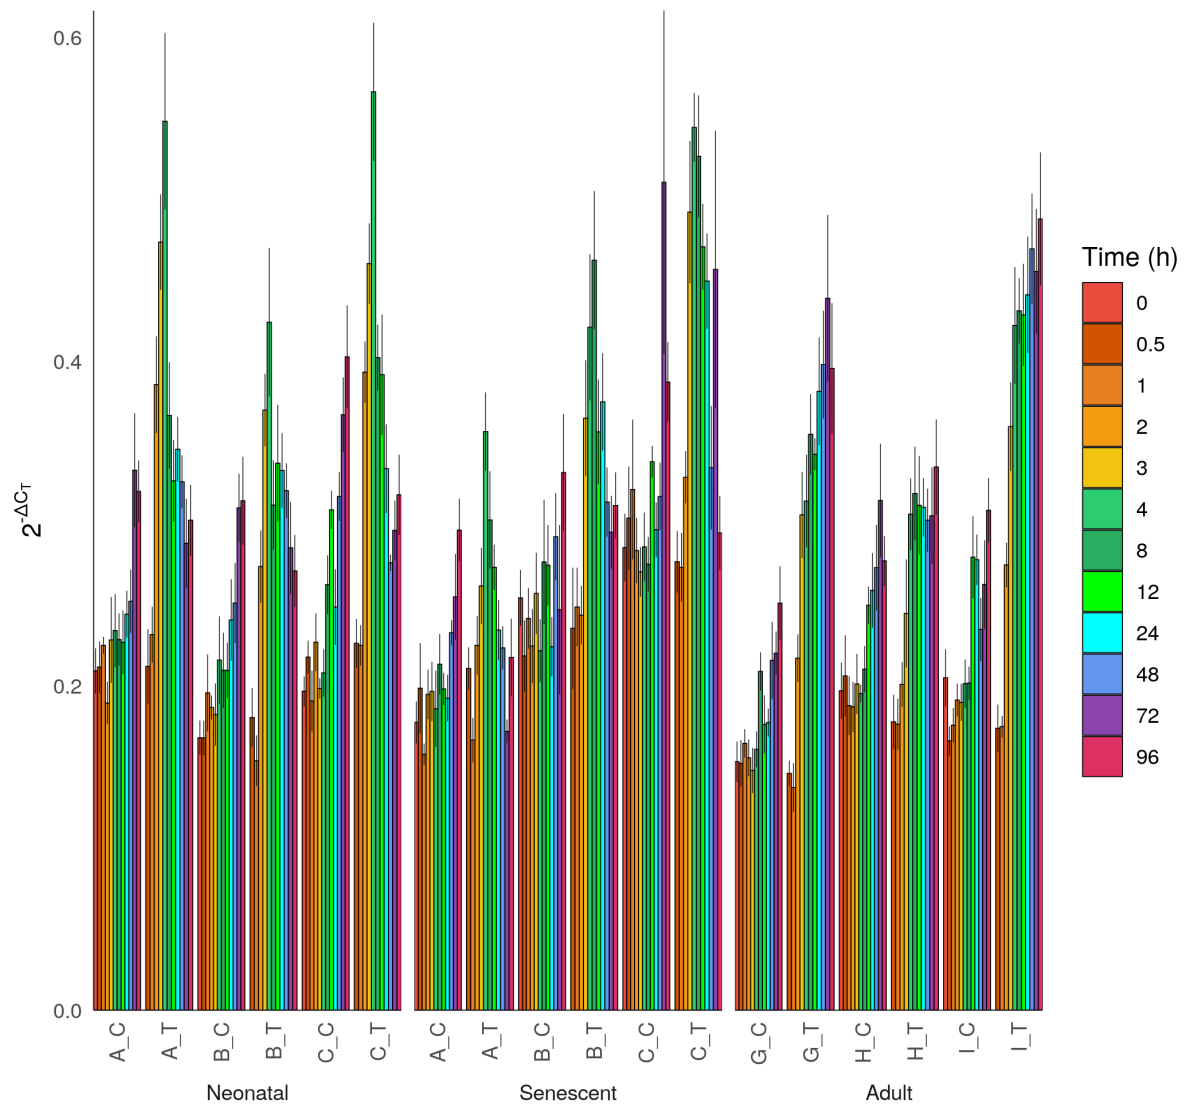

## SKIL

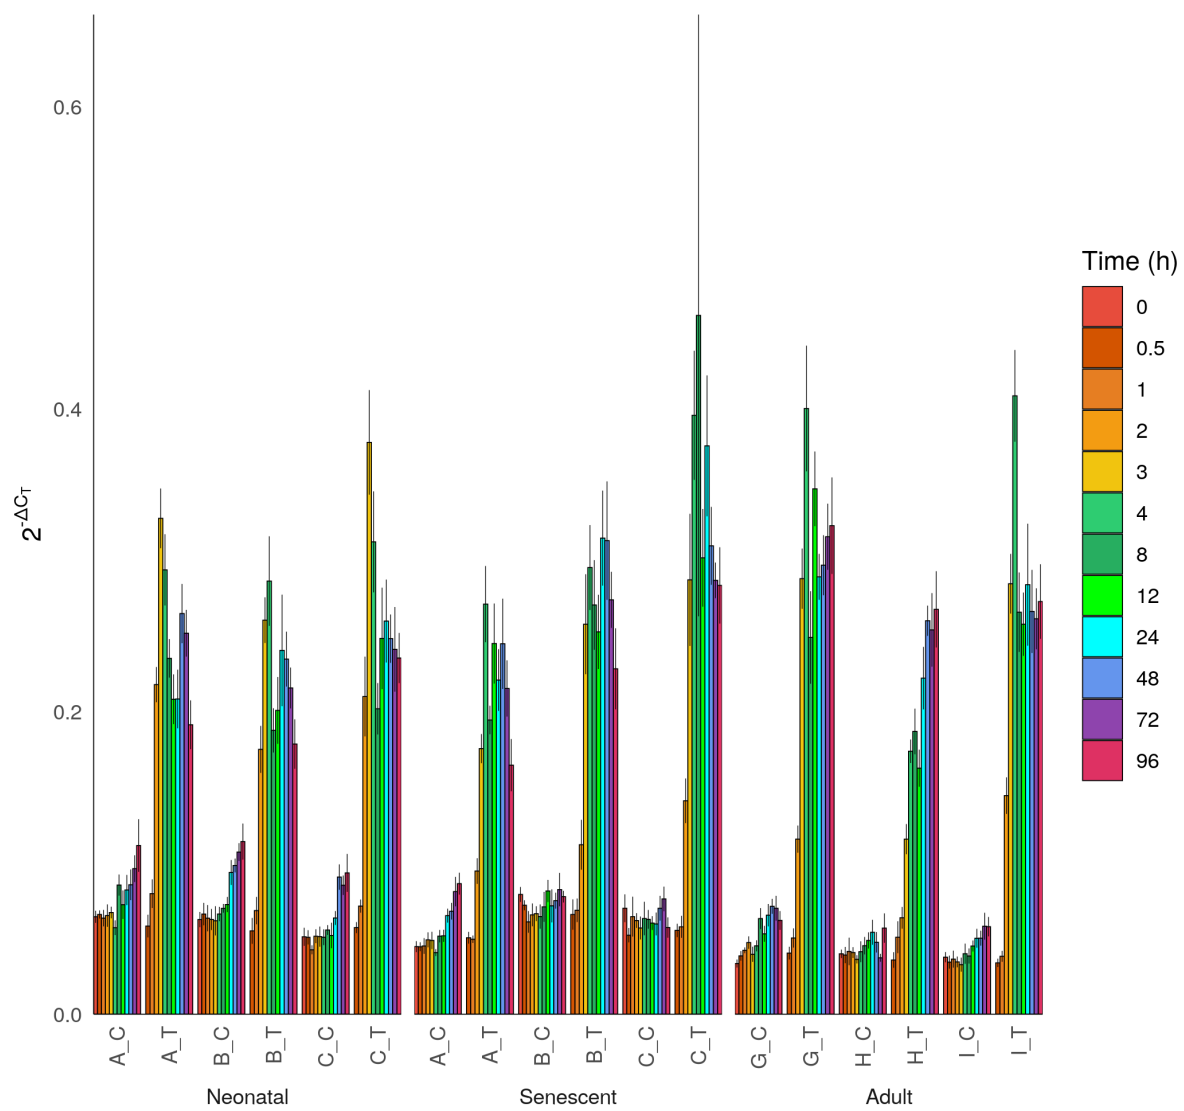



SMAD3

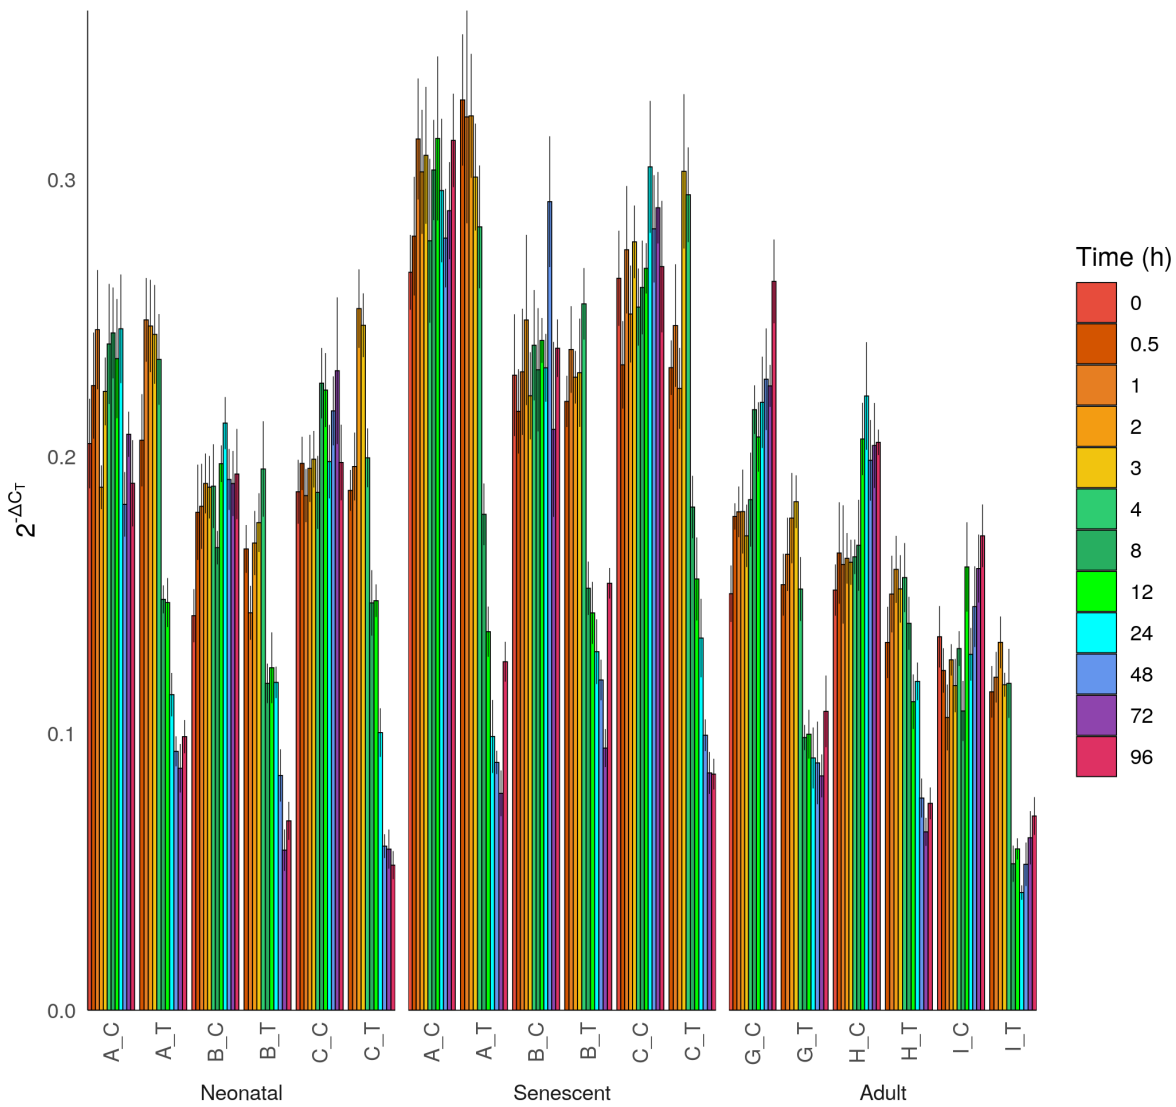

SMAD7

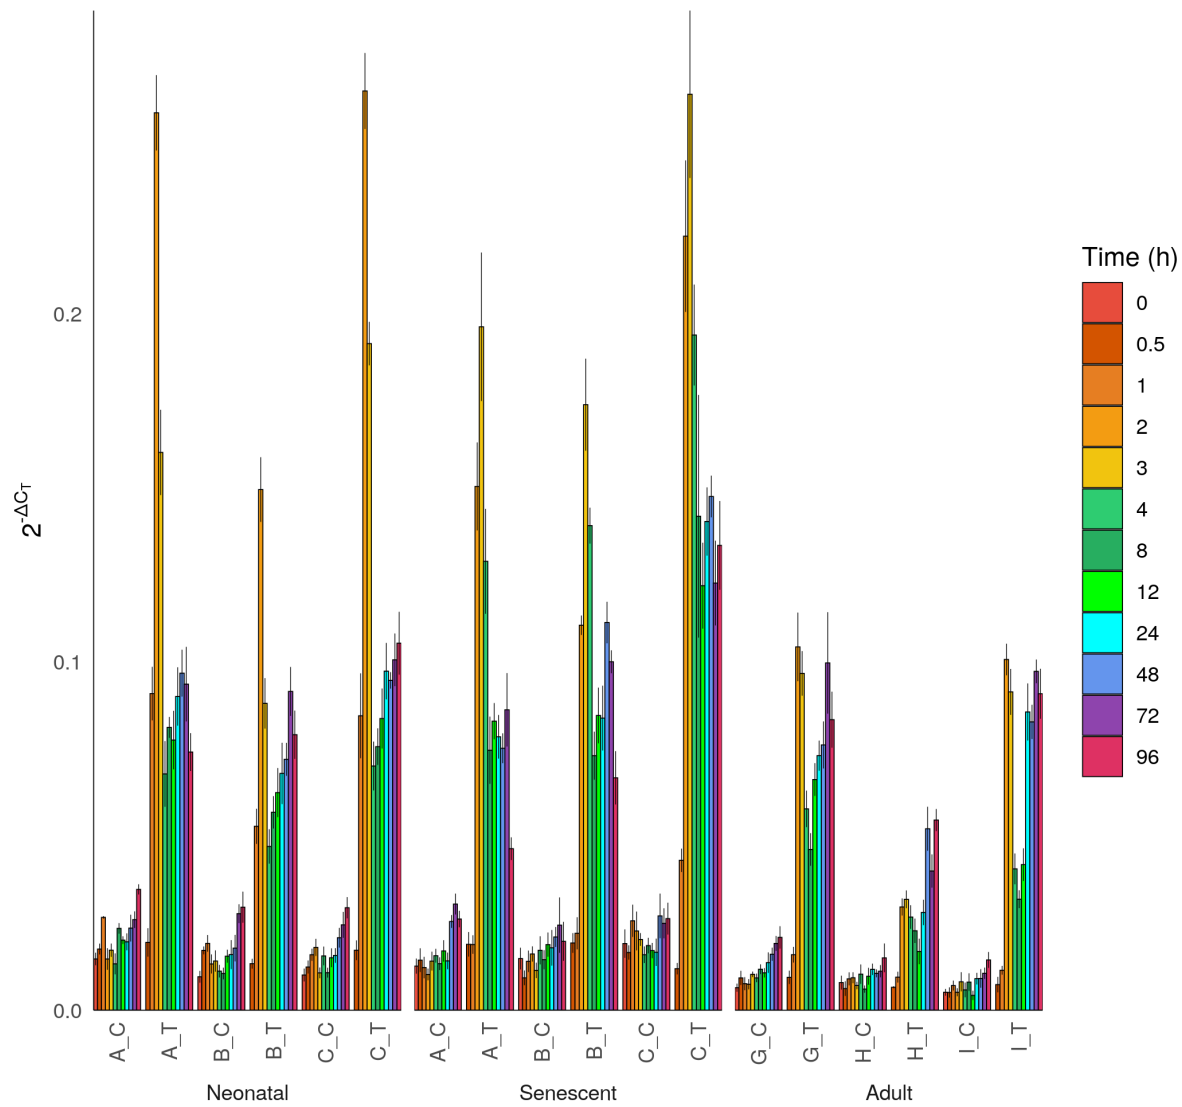

SPARC

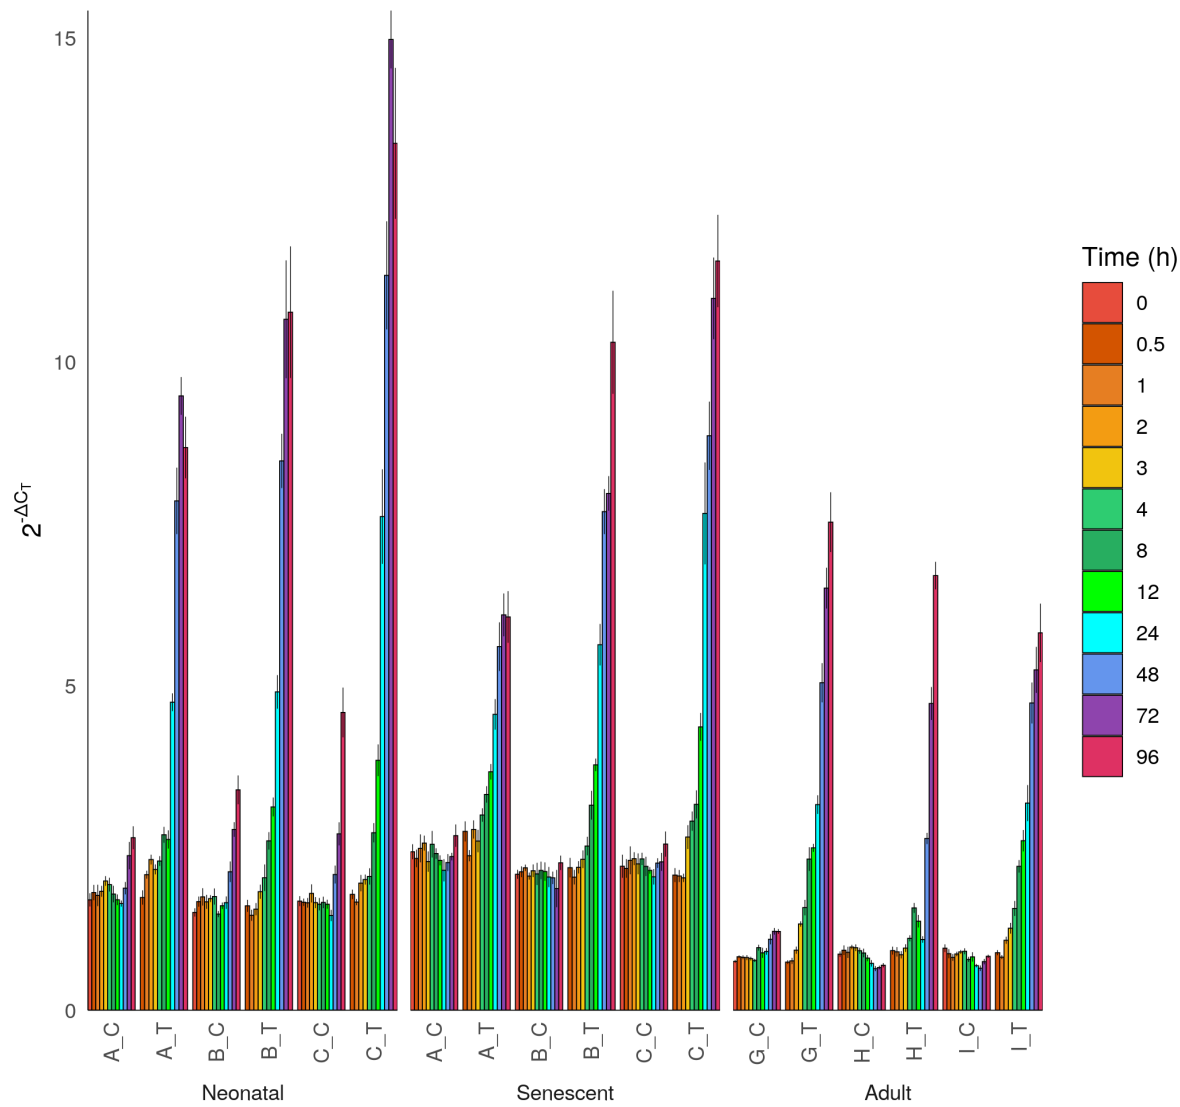

# TGFBR1

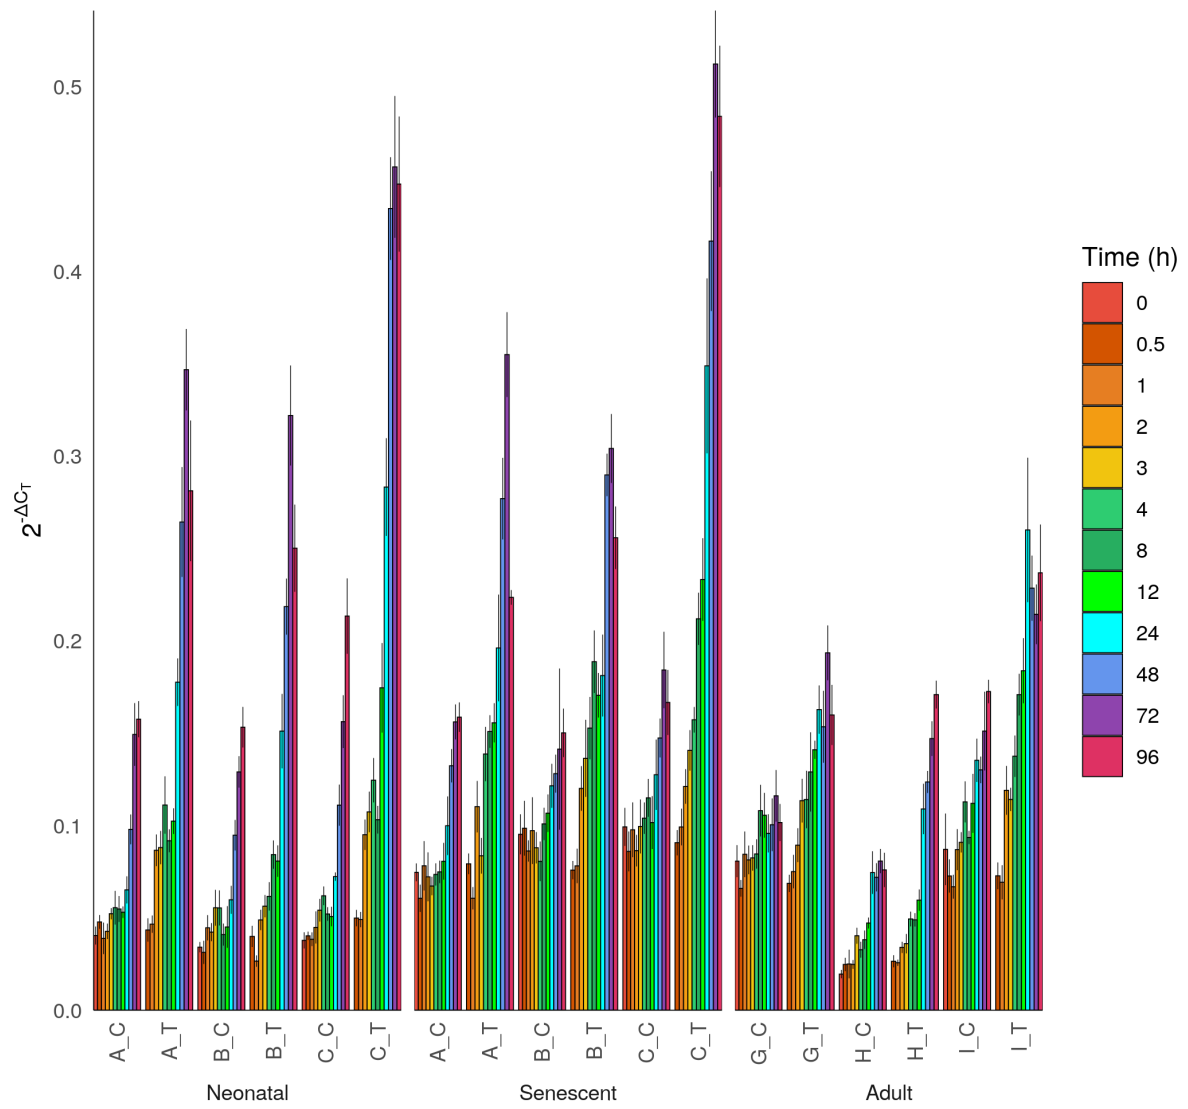

# TGFBR2

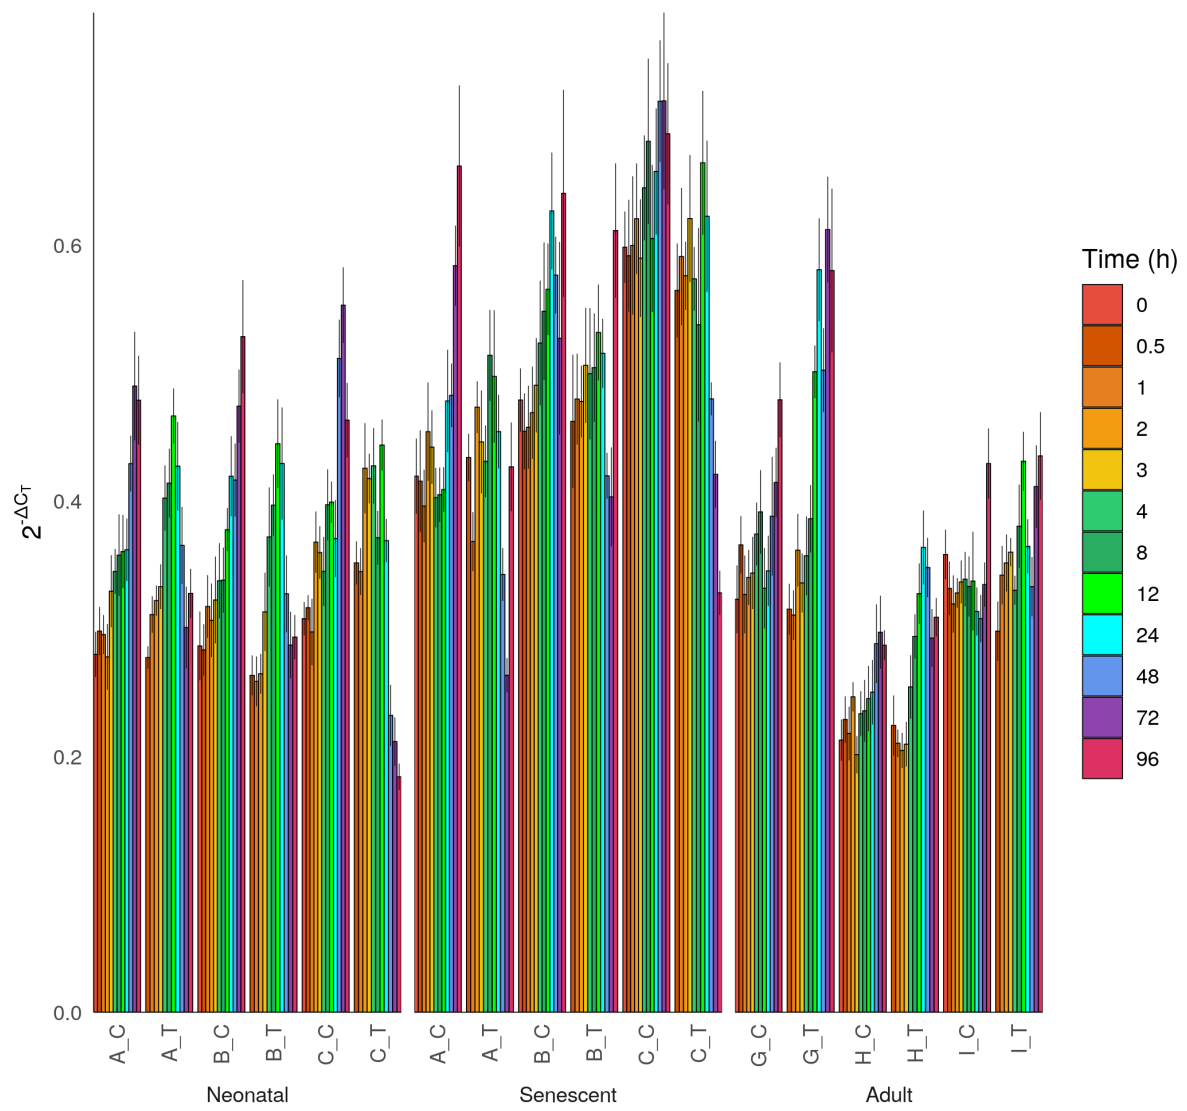

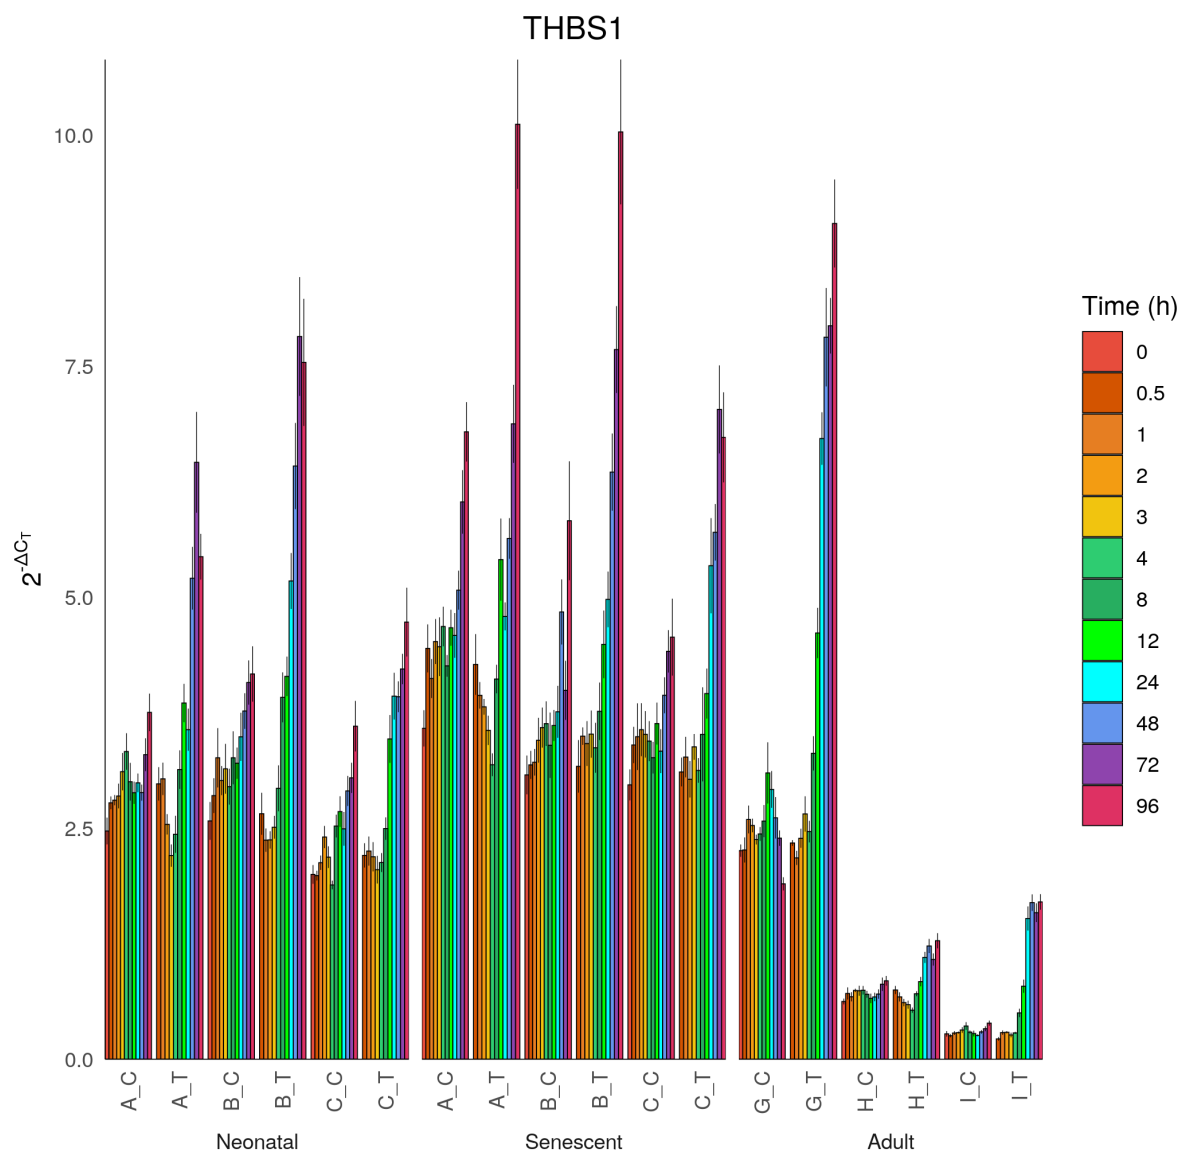

# THBS2

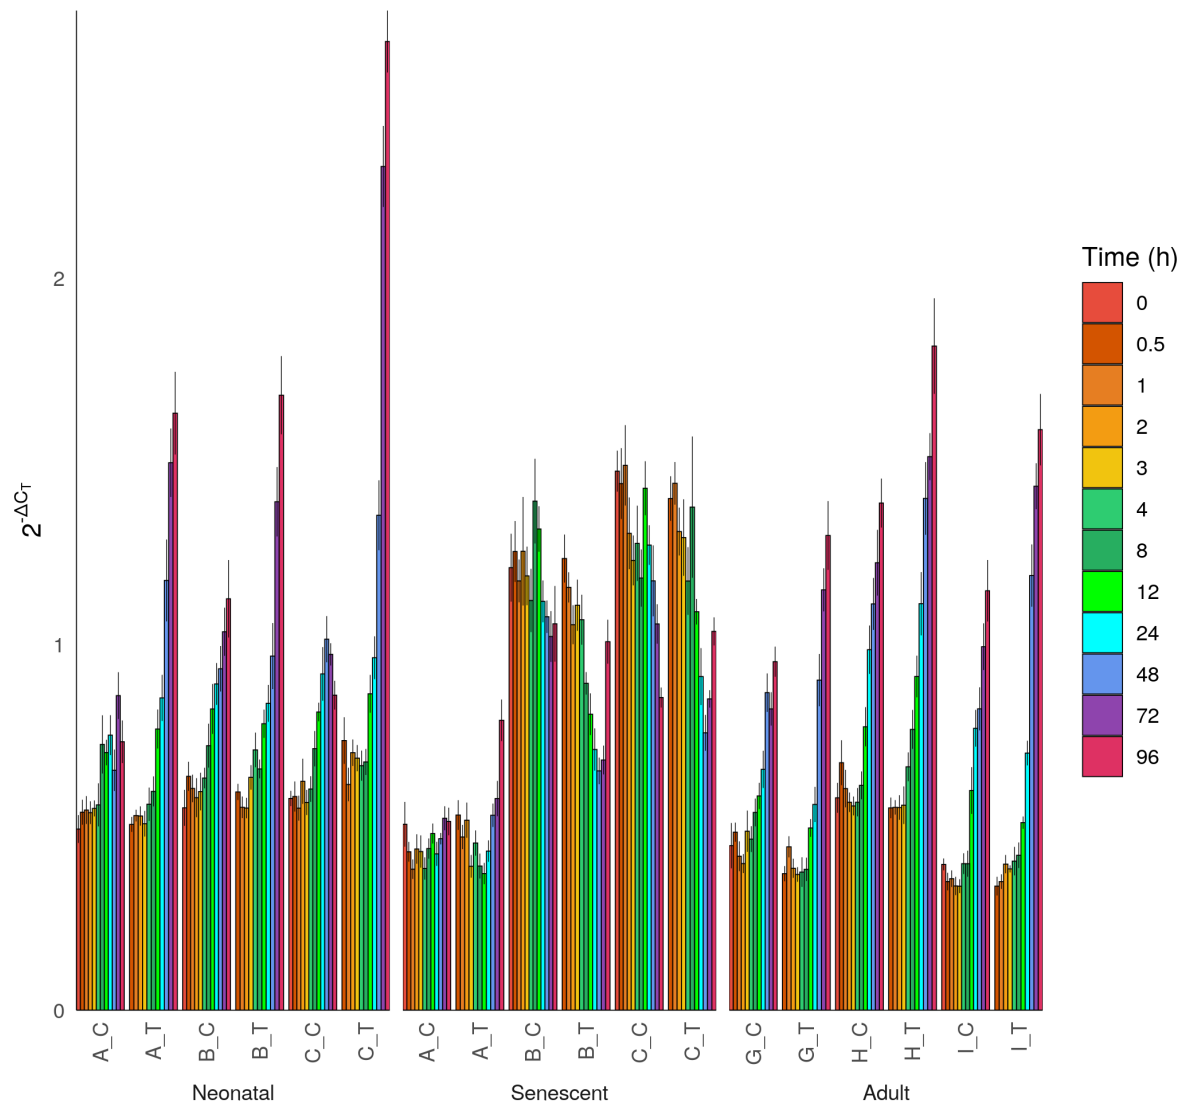

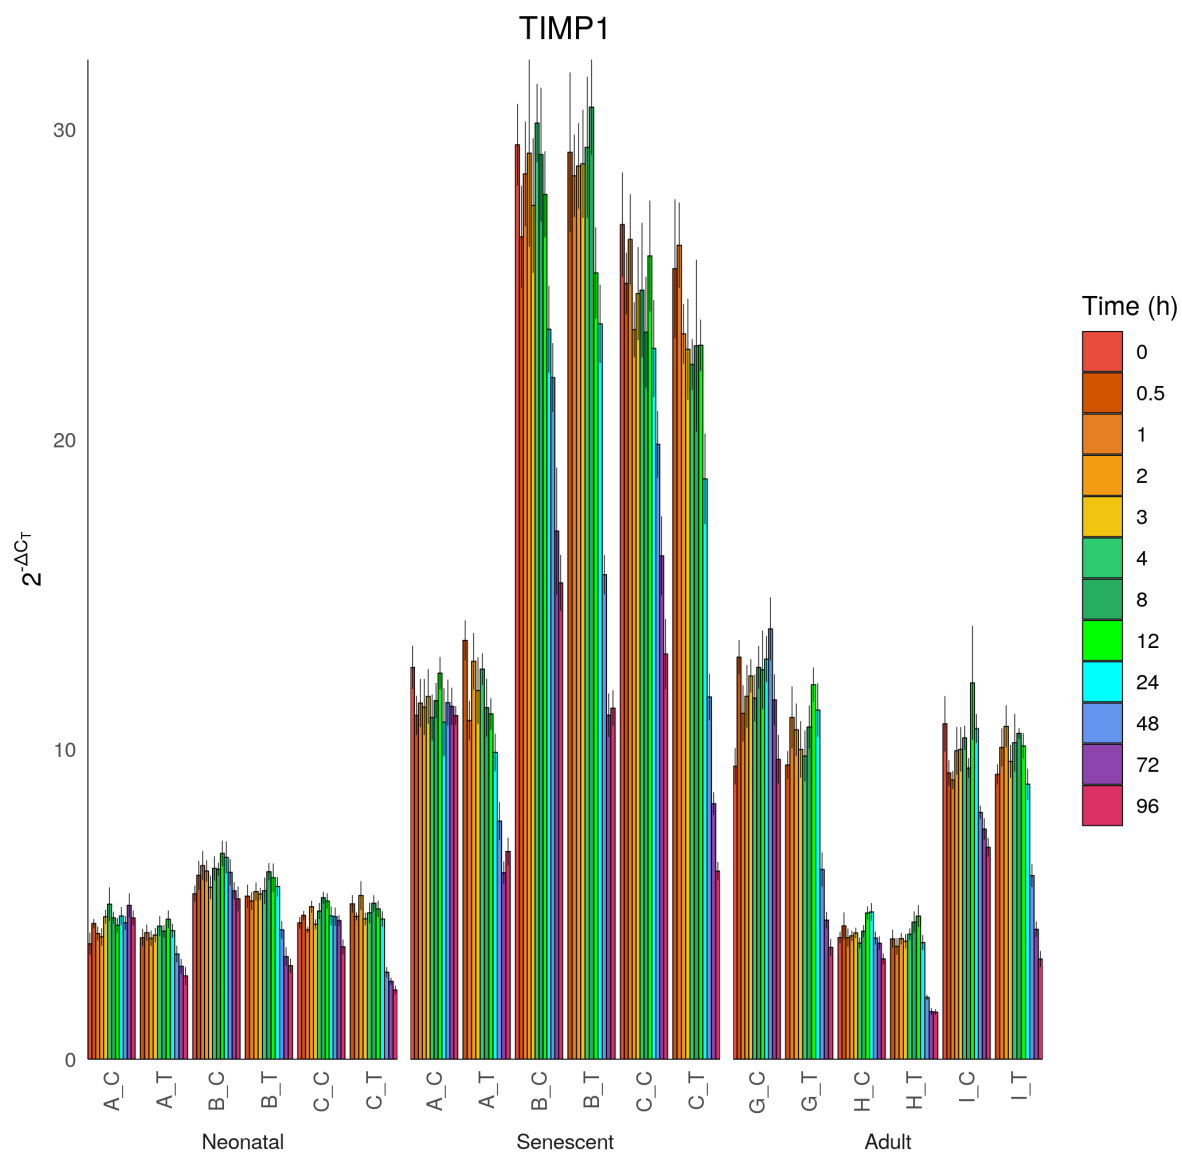



TIMP3

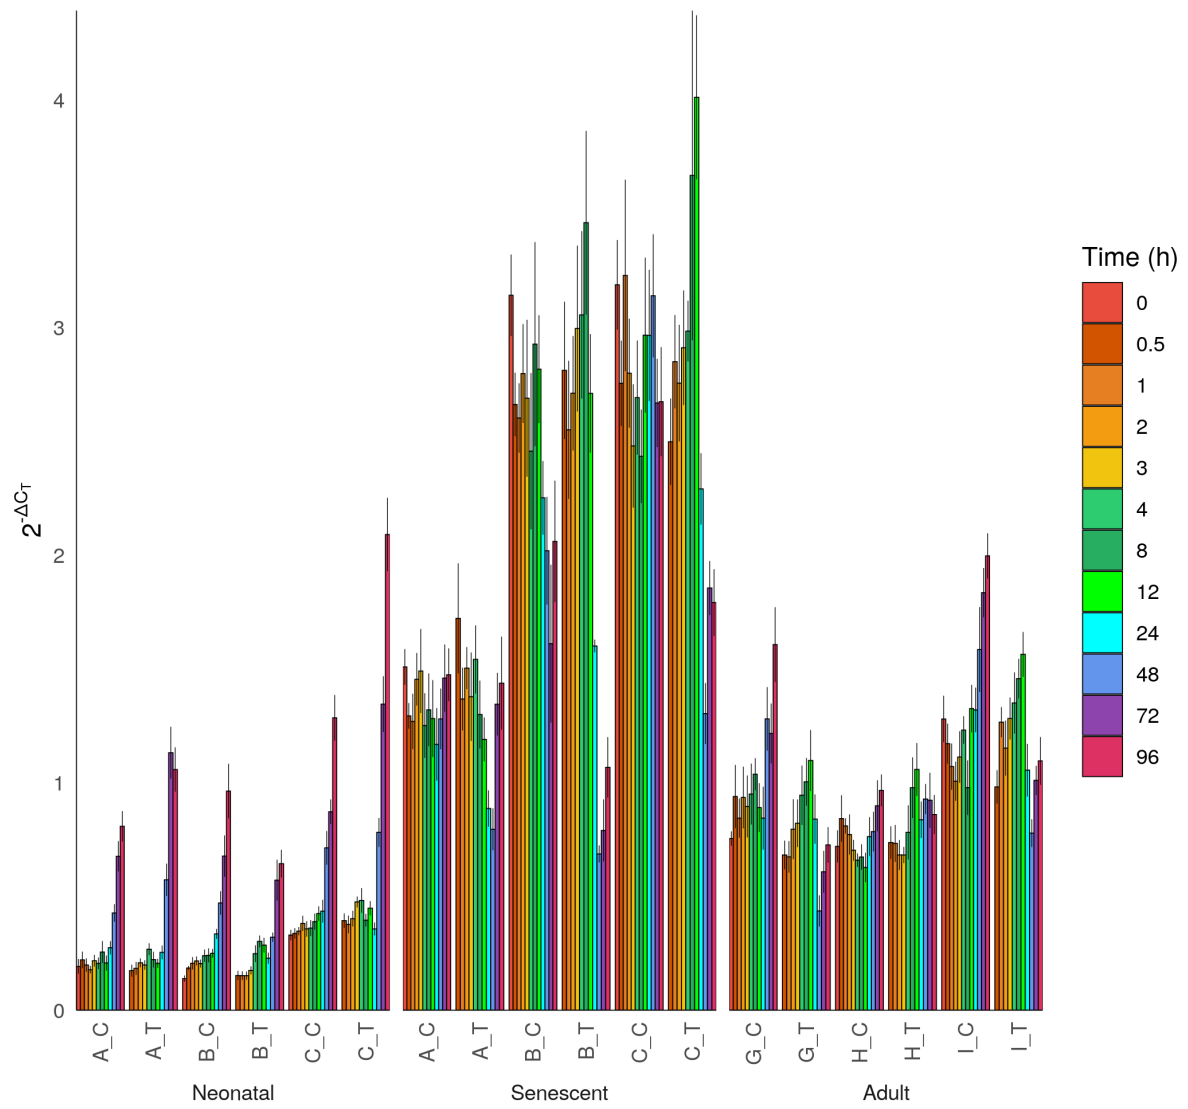

# TP53BP1

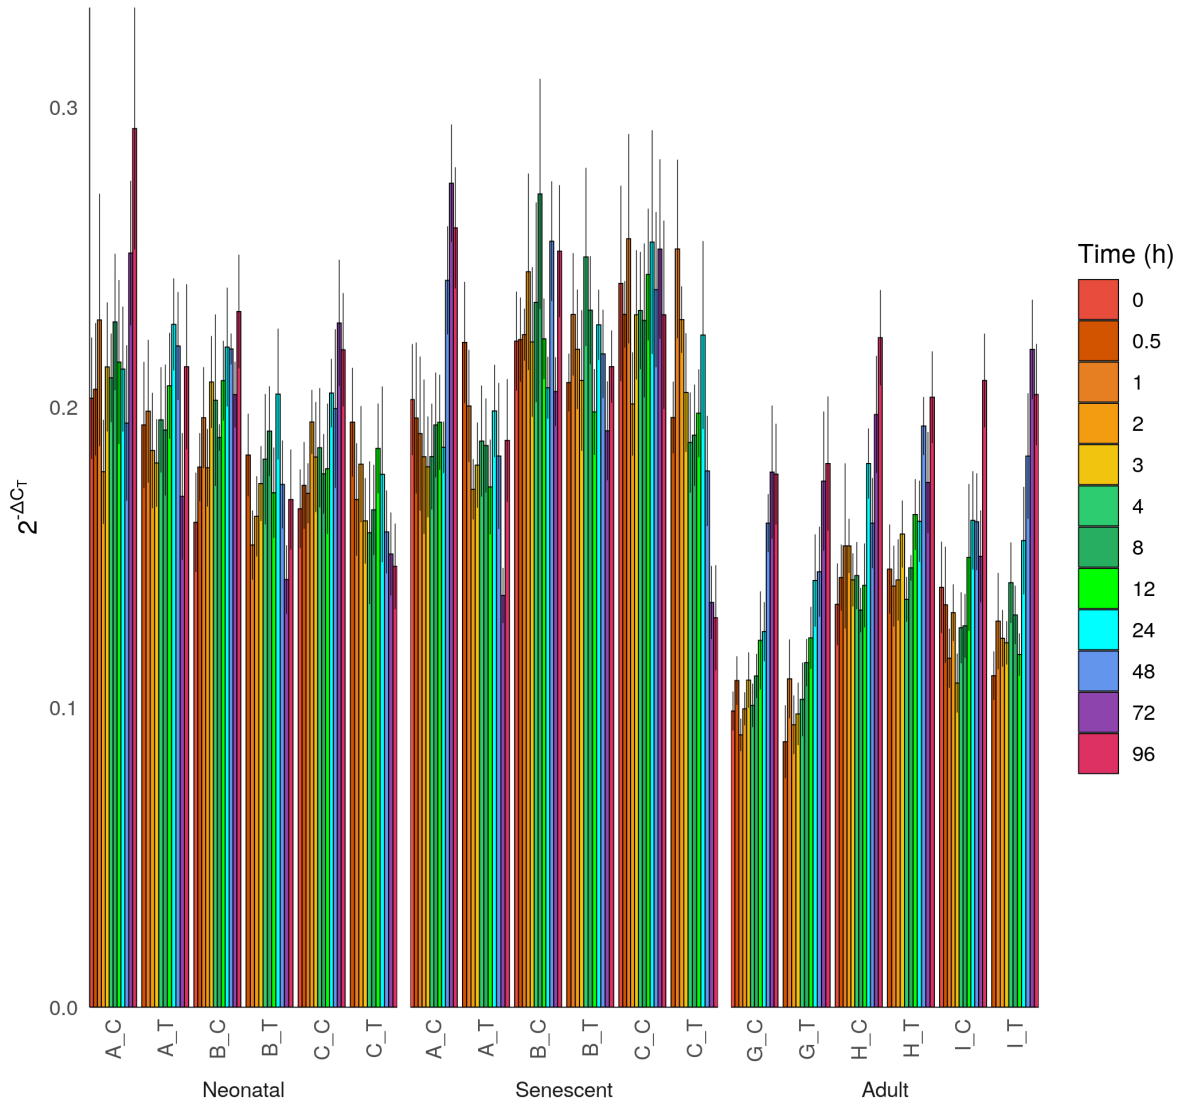

# VIM

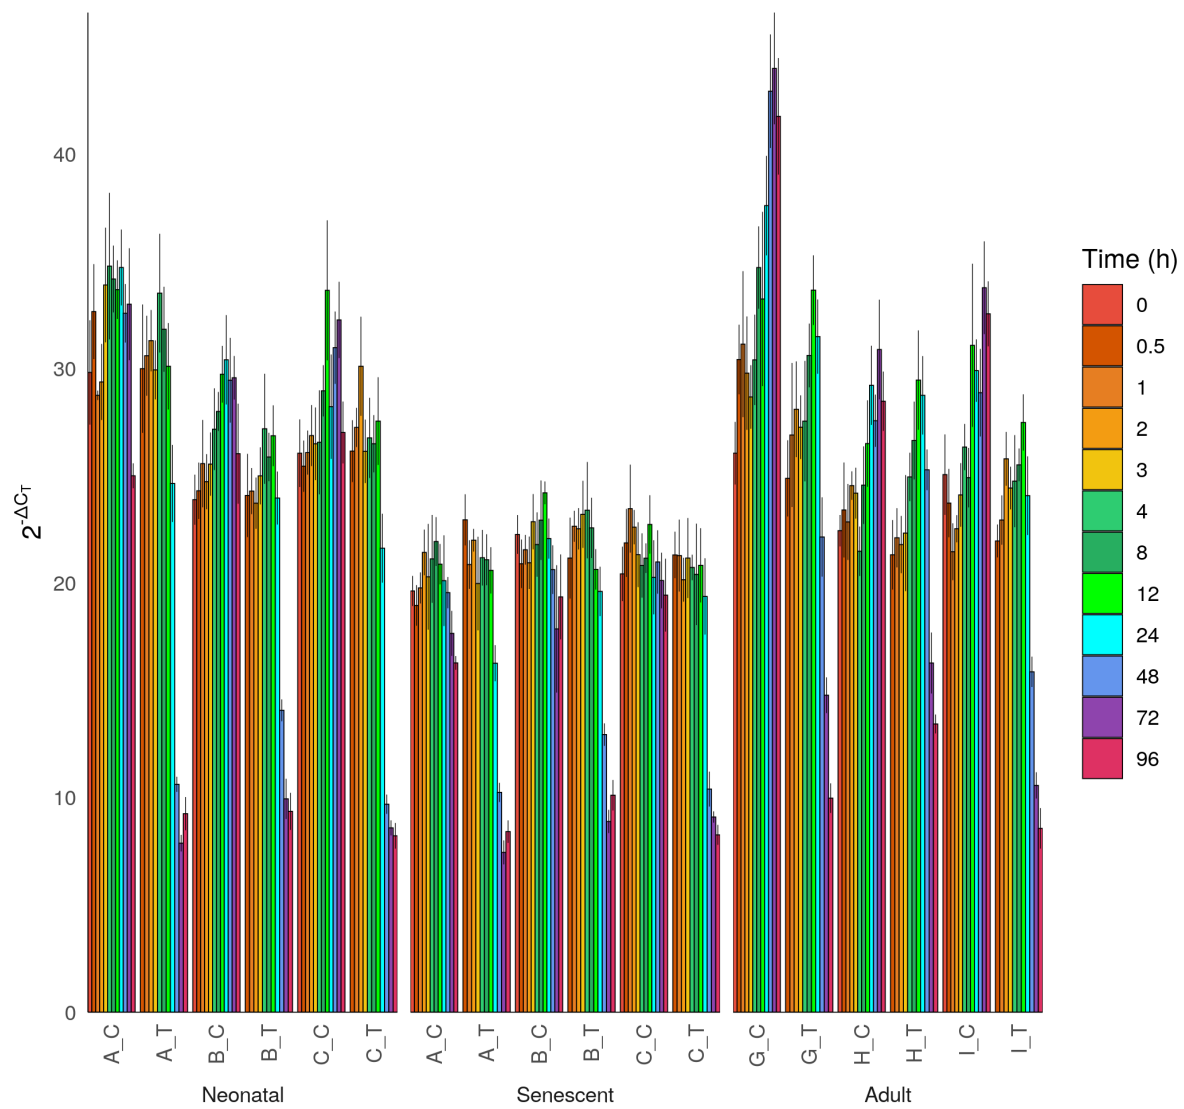

Supplement: s1 [file s1]
