# Supplementary material for: Cell Senescence-Independent Changes of Human Skin Fibroblasts with Age
Source: MDPI journal article supplement (doi:10.3390/cells13080659), 2024-04-09

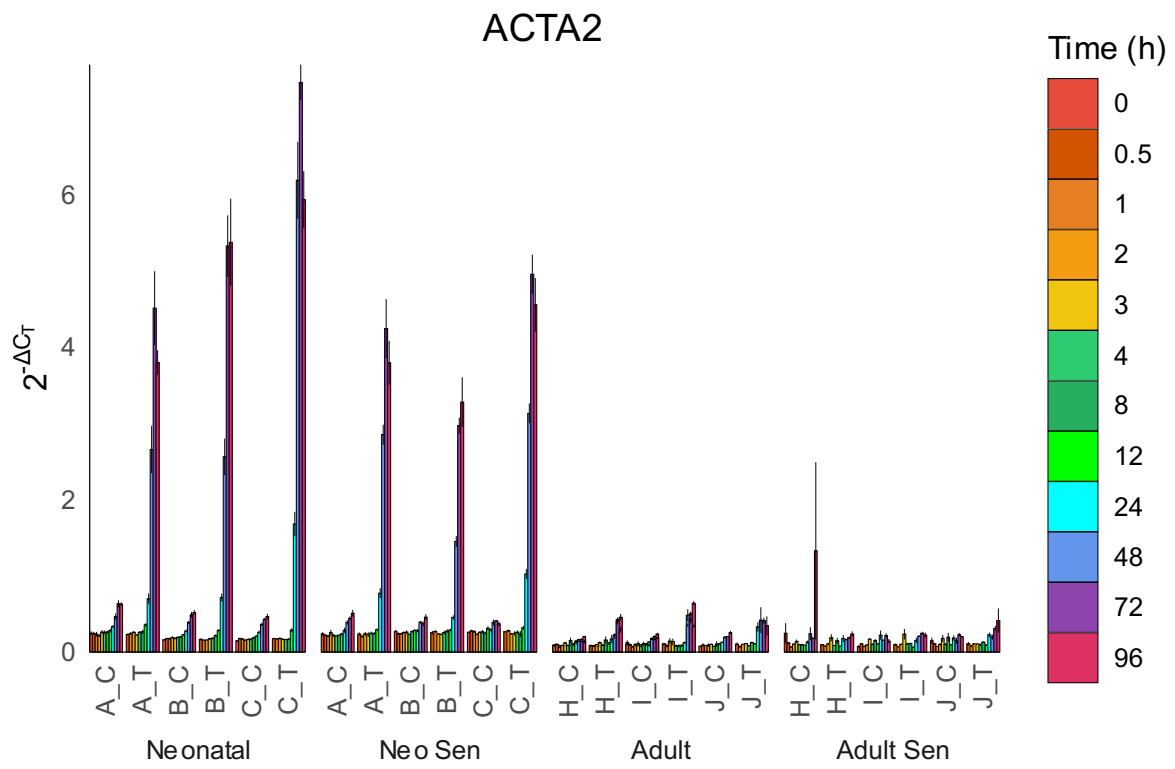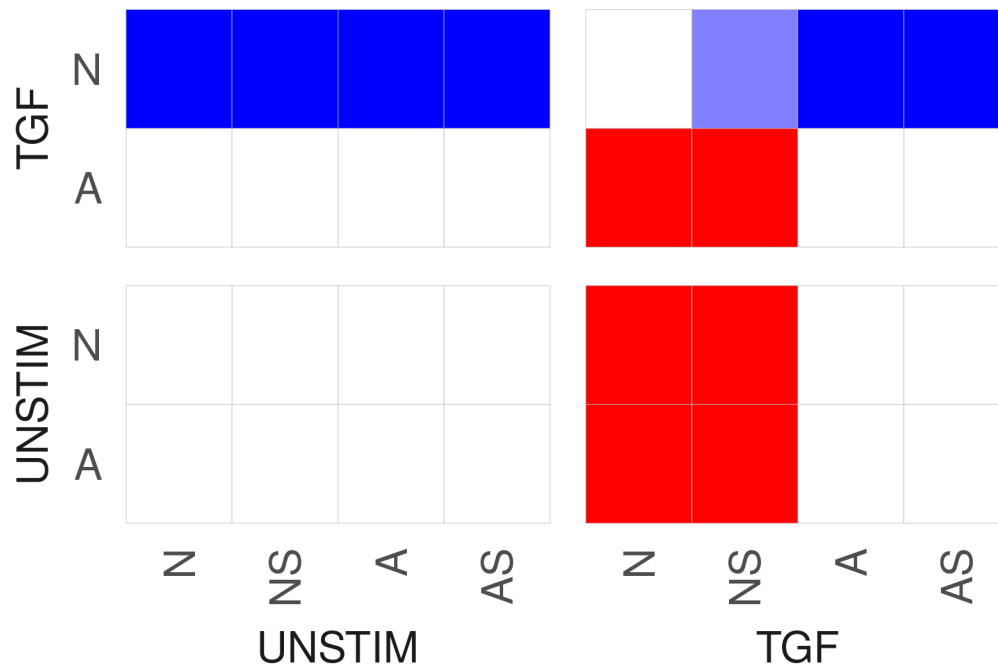

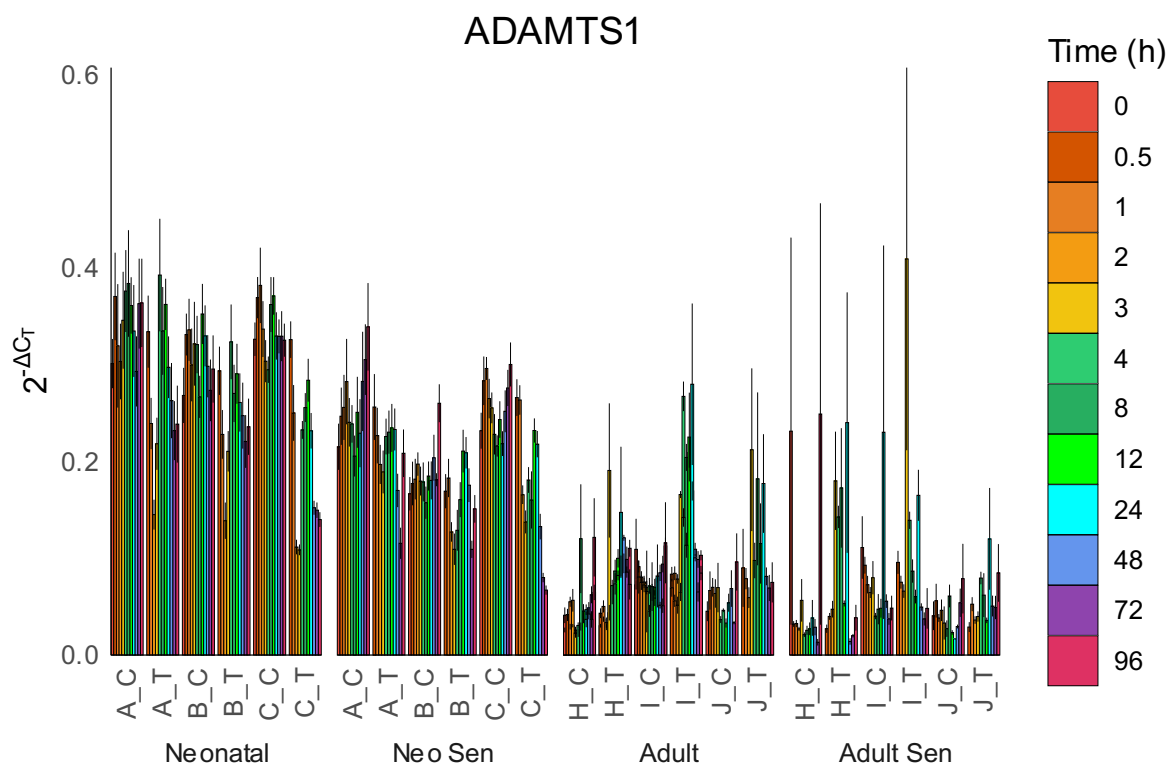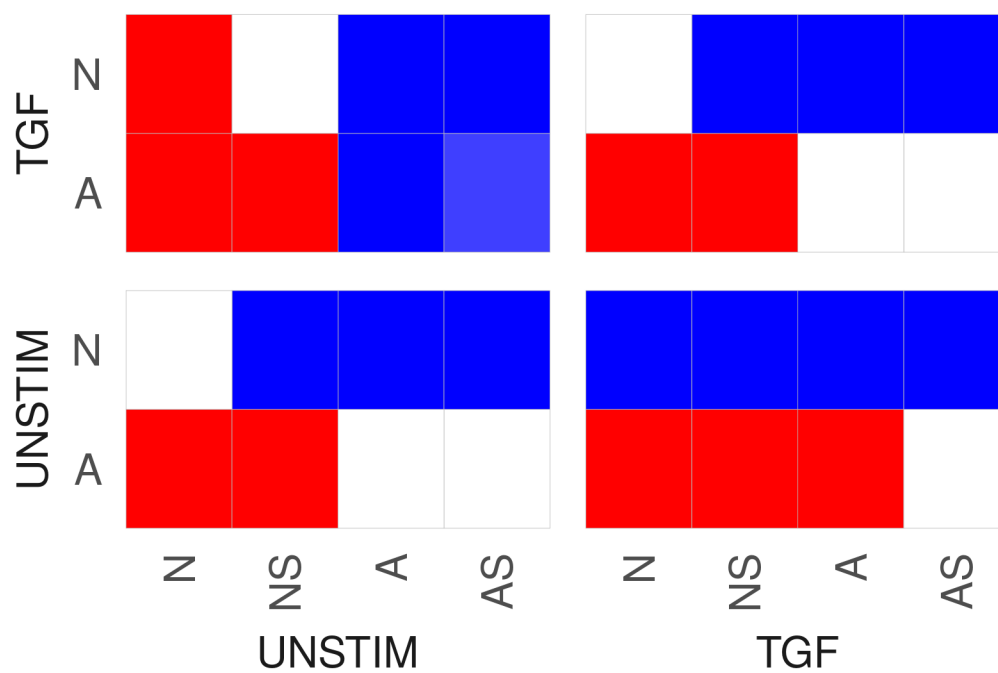

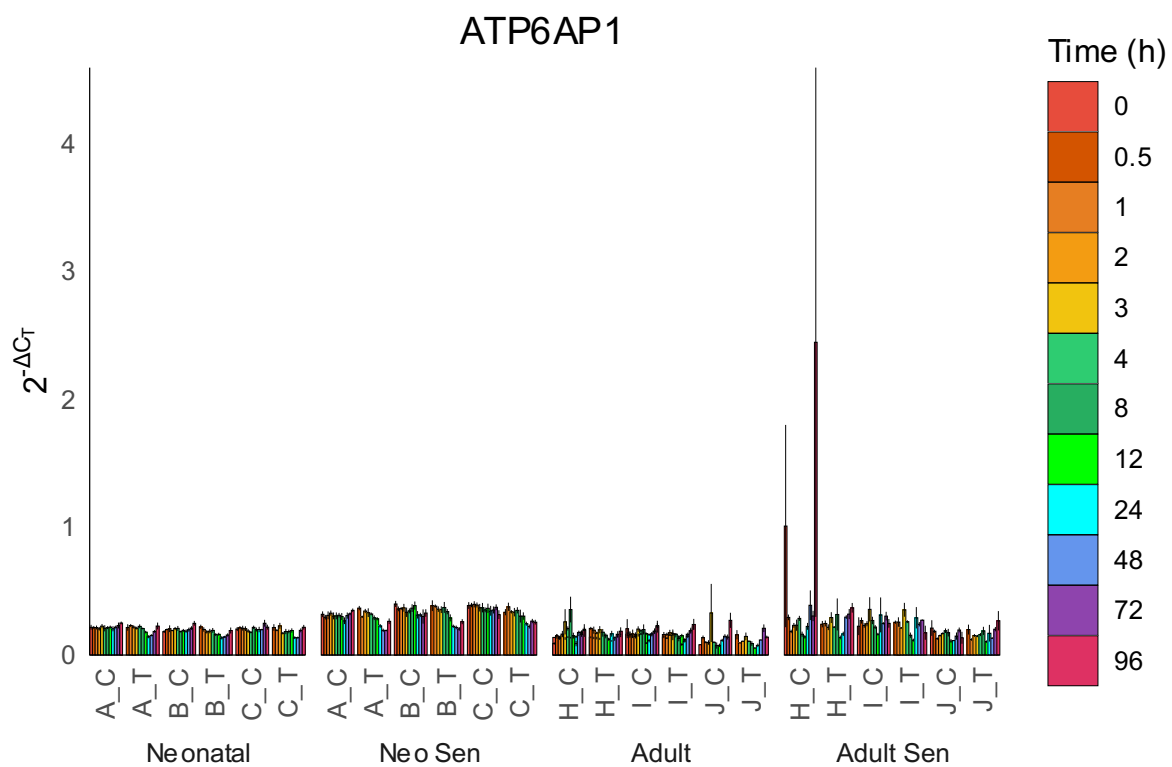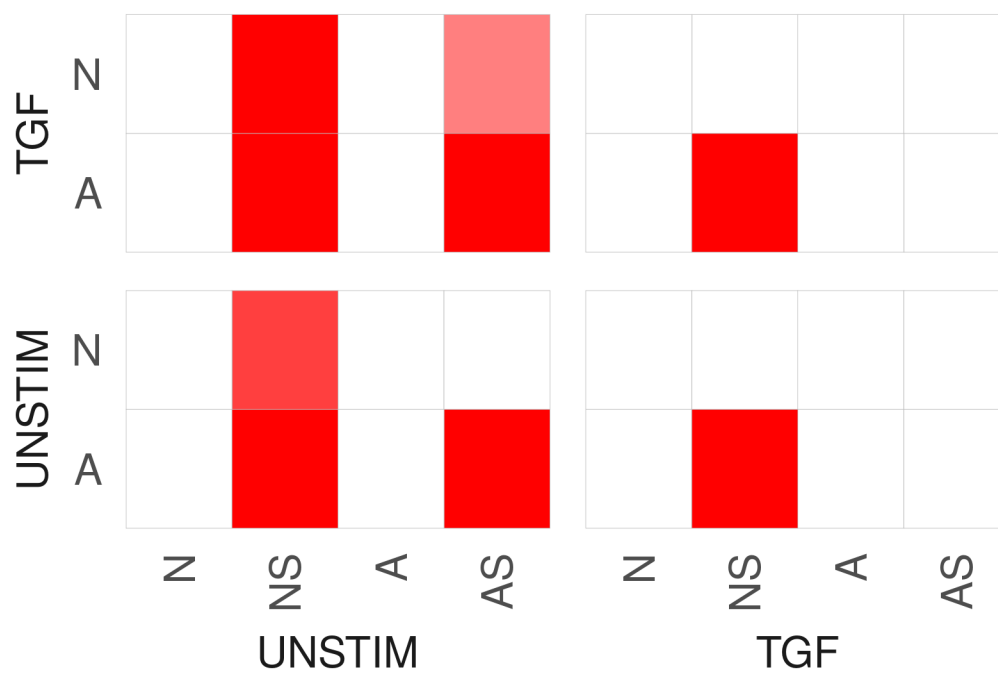

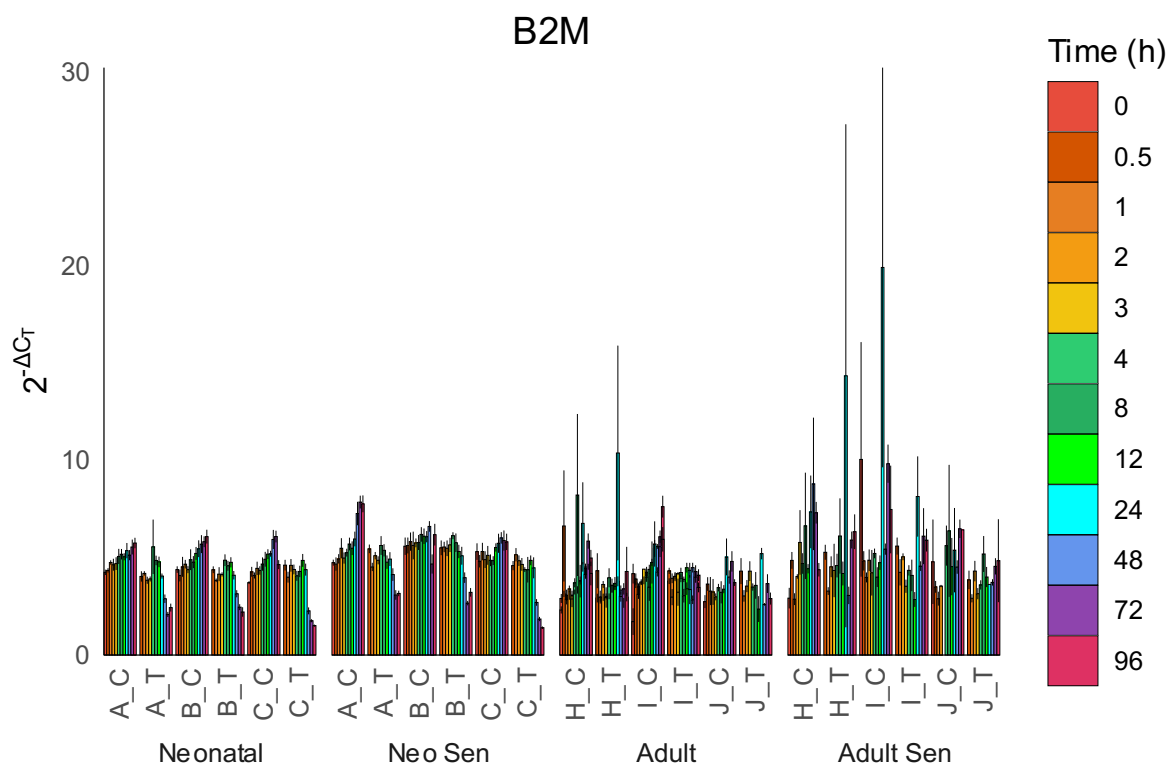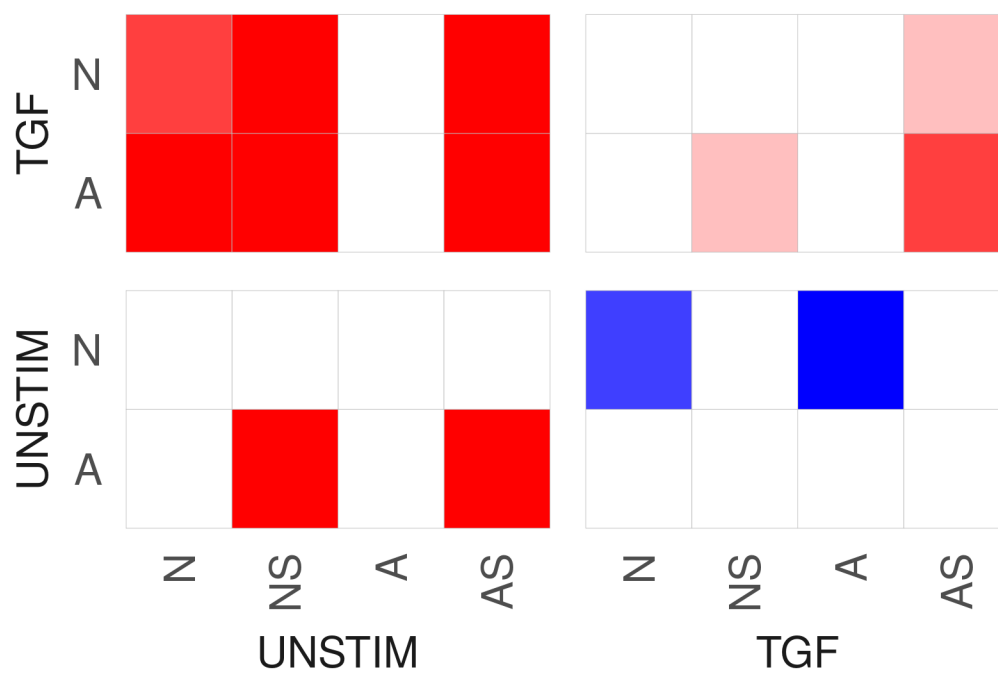

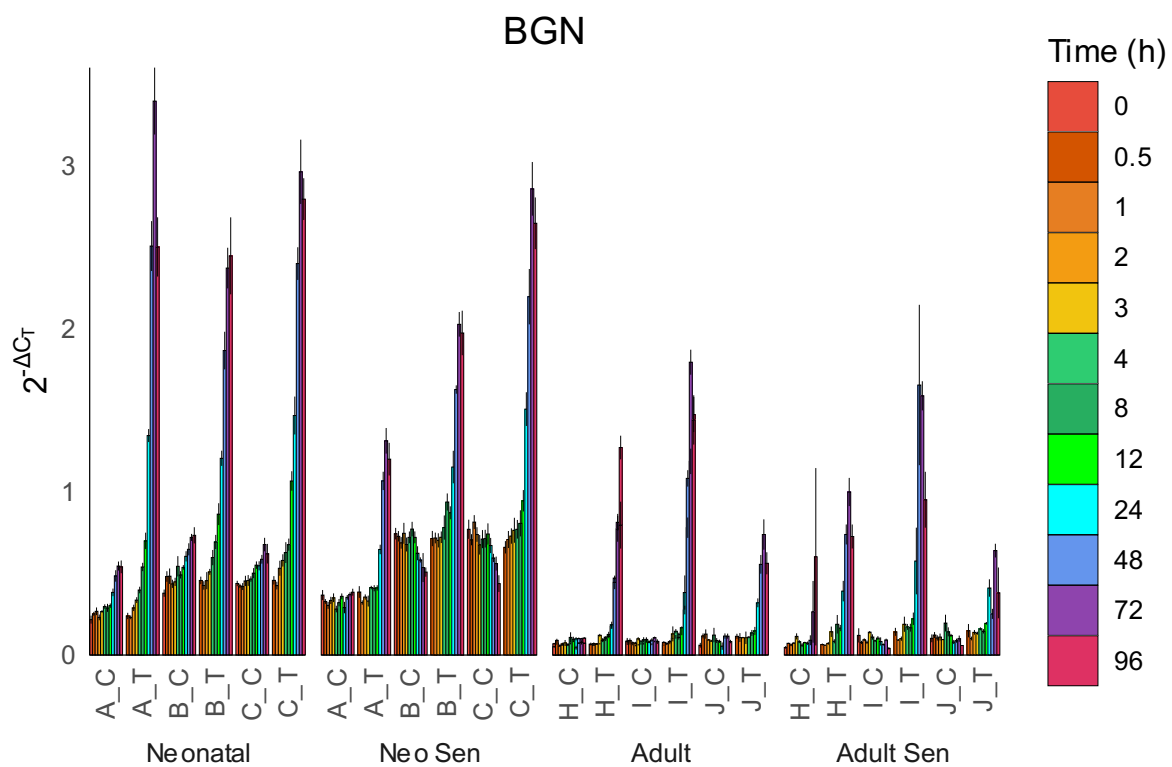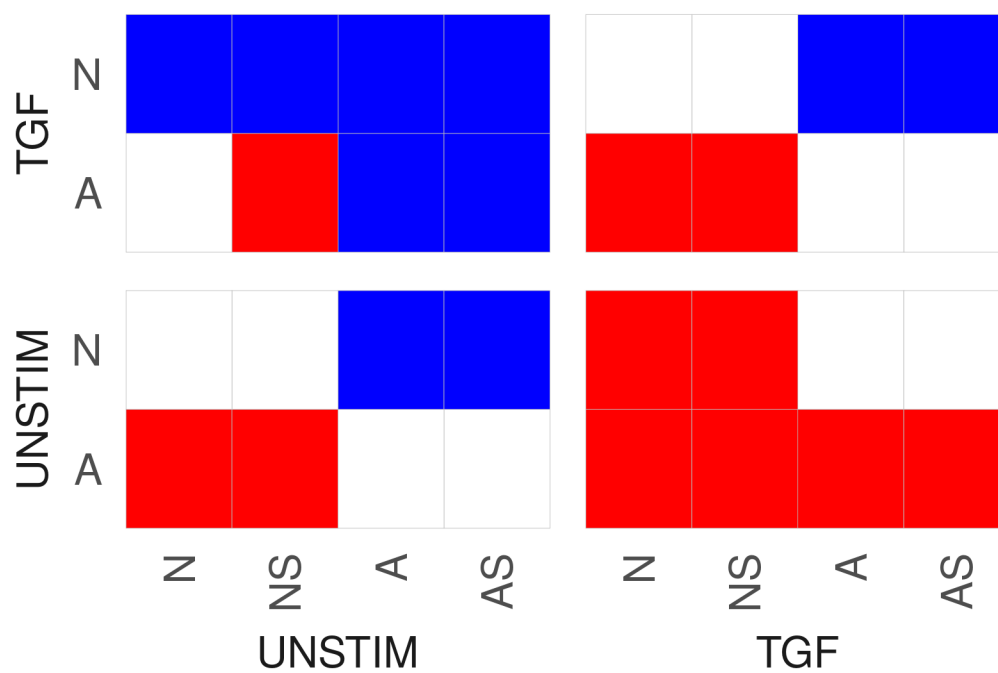

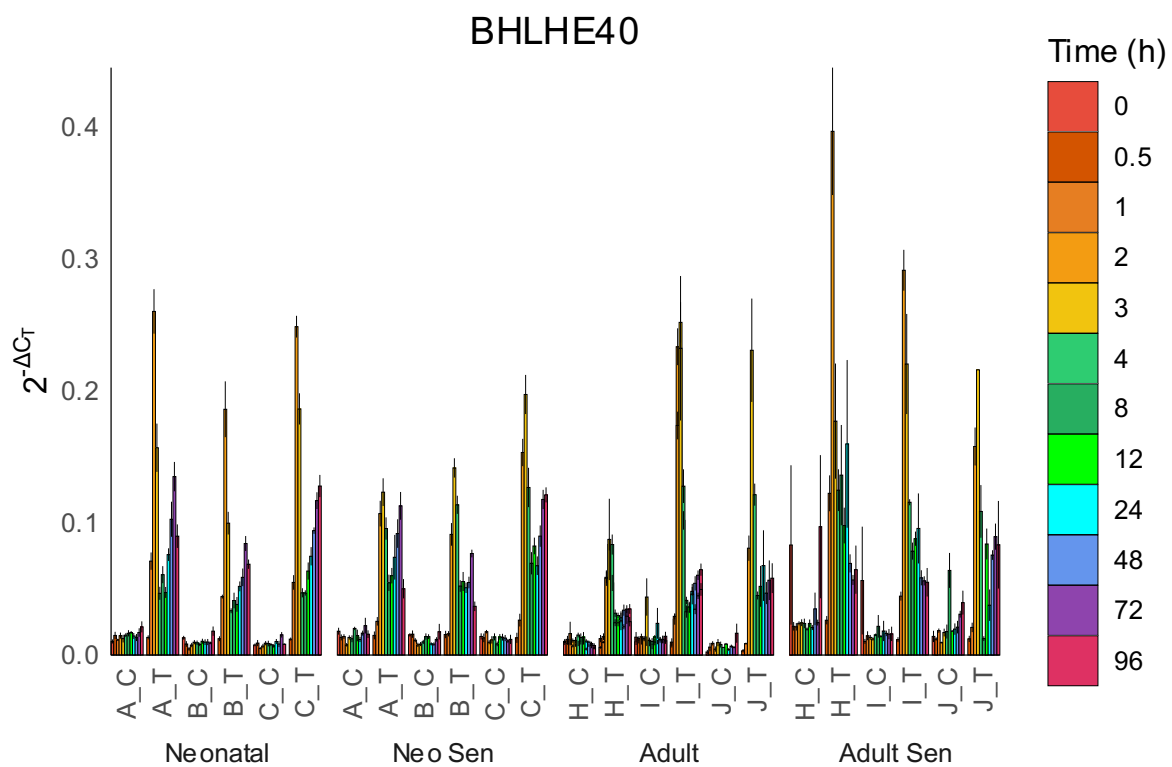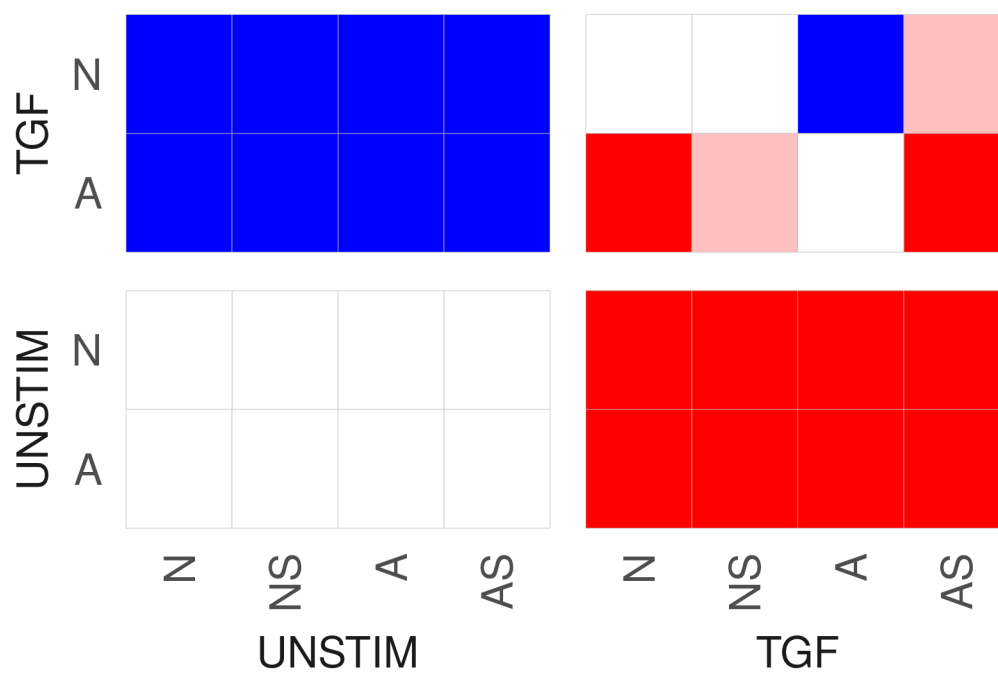

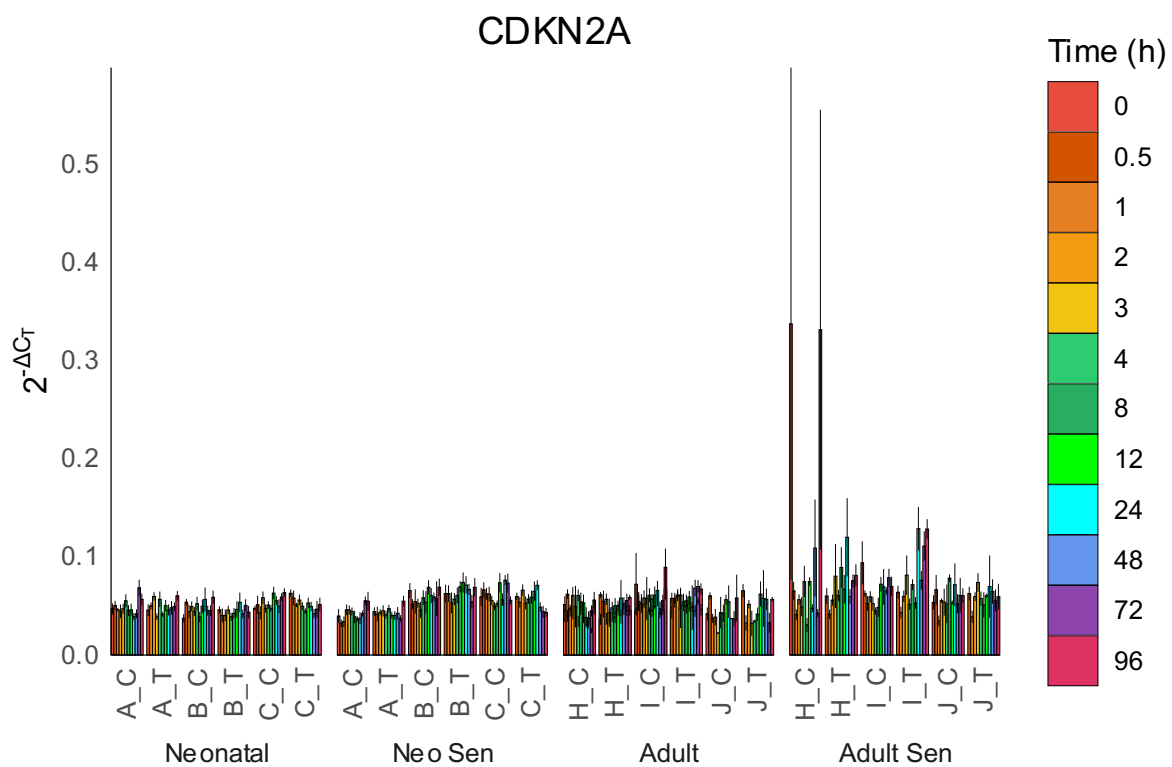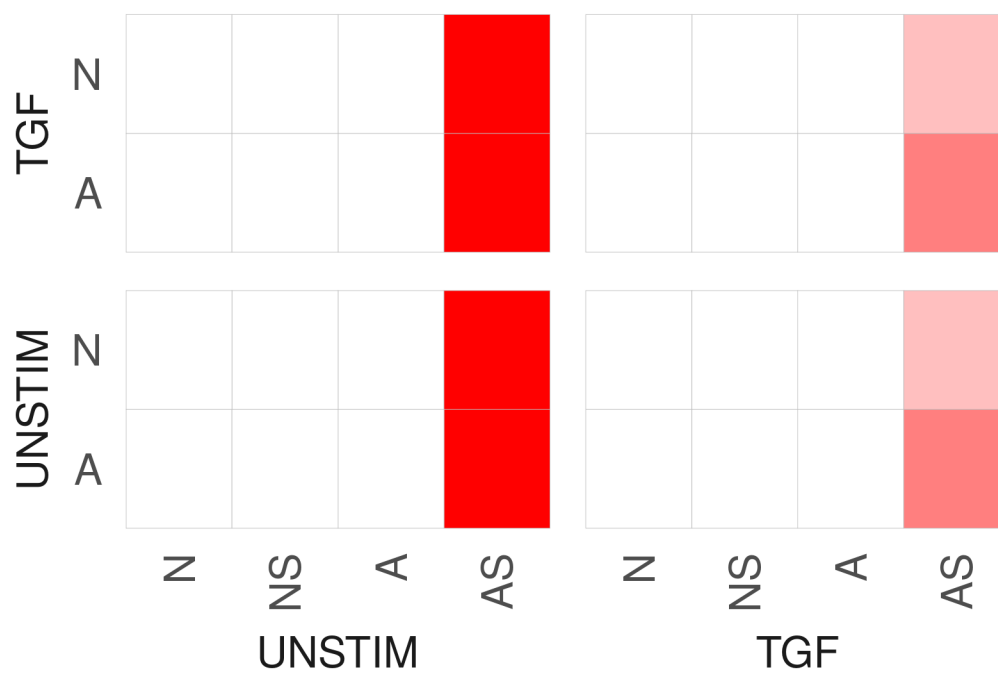

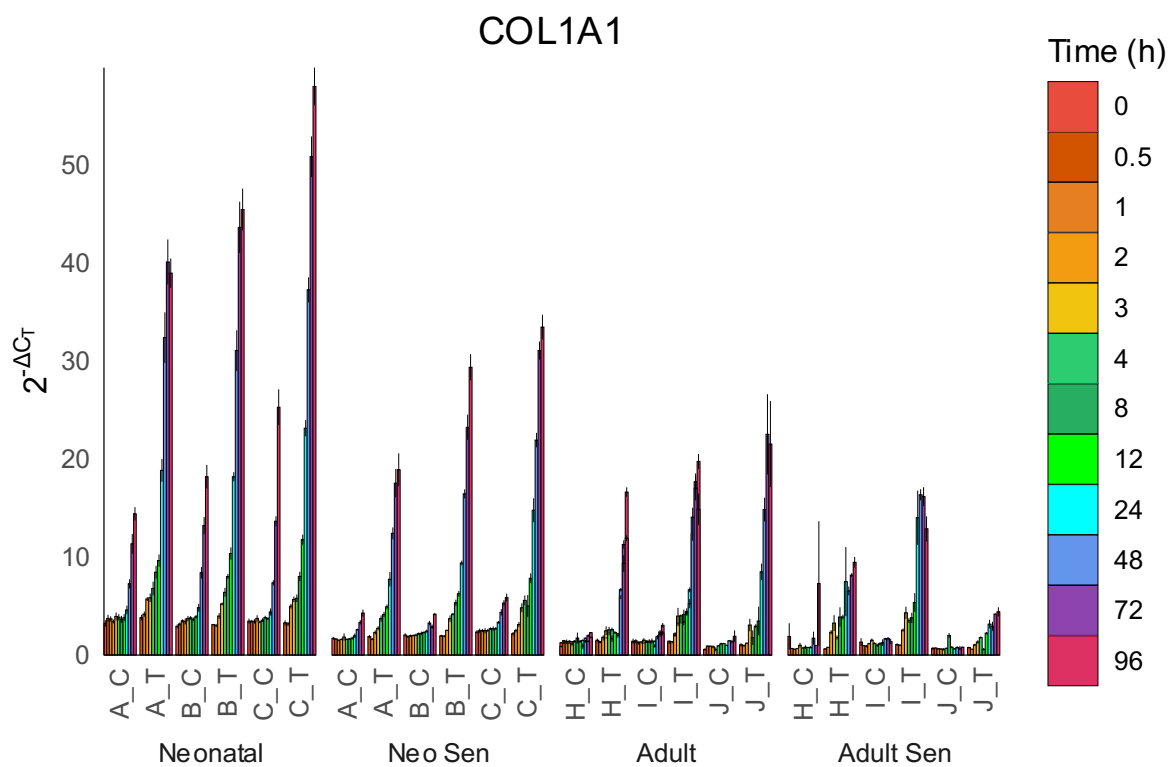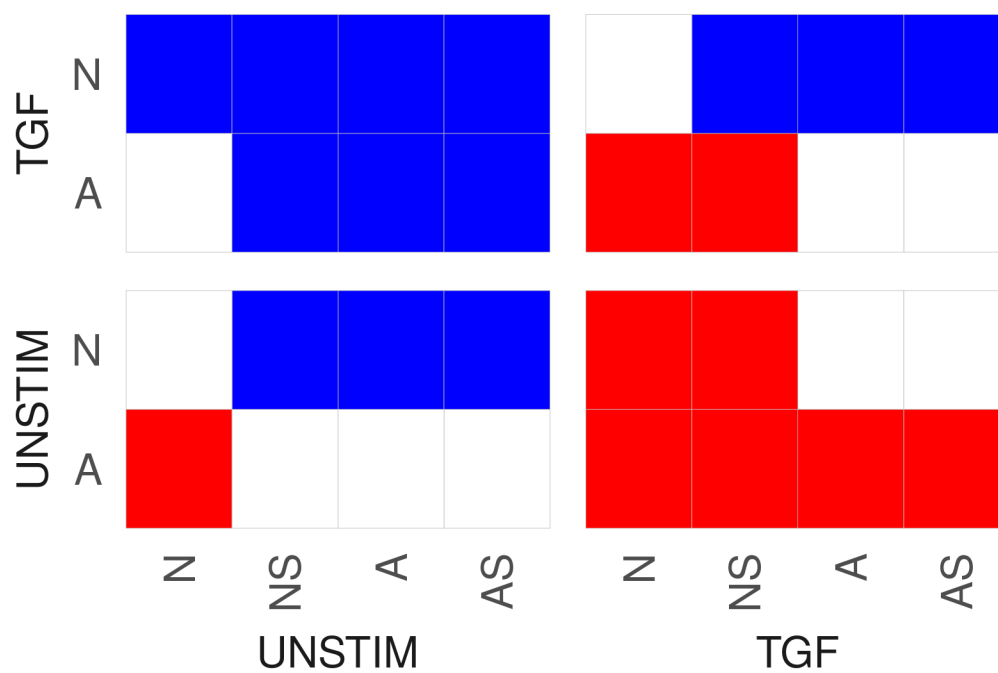



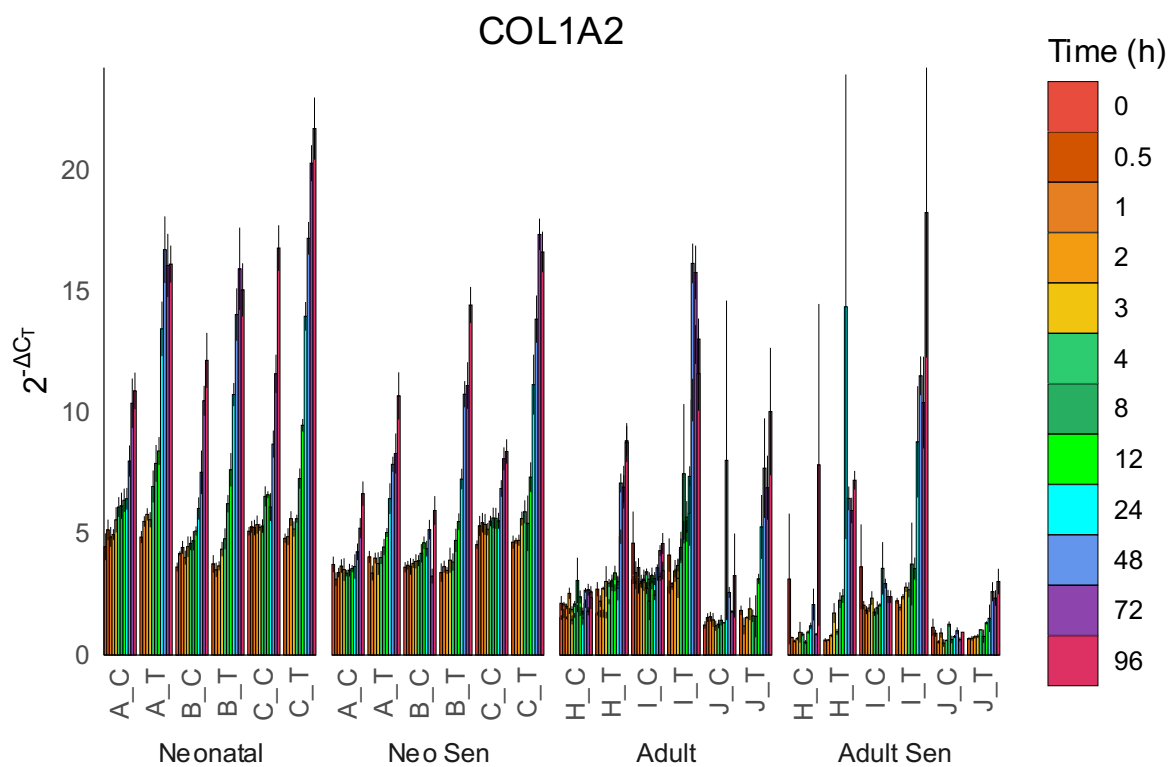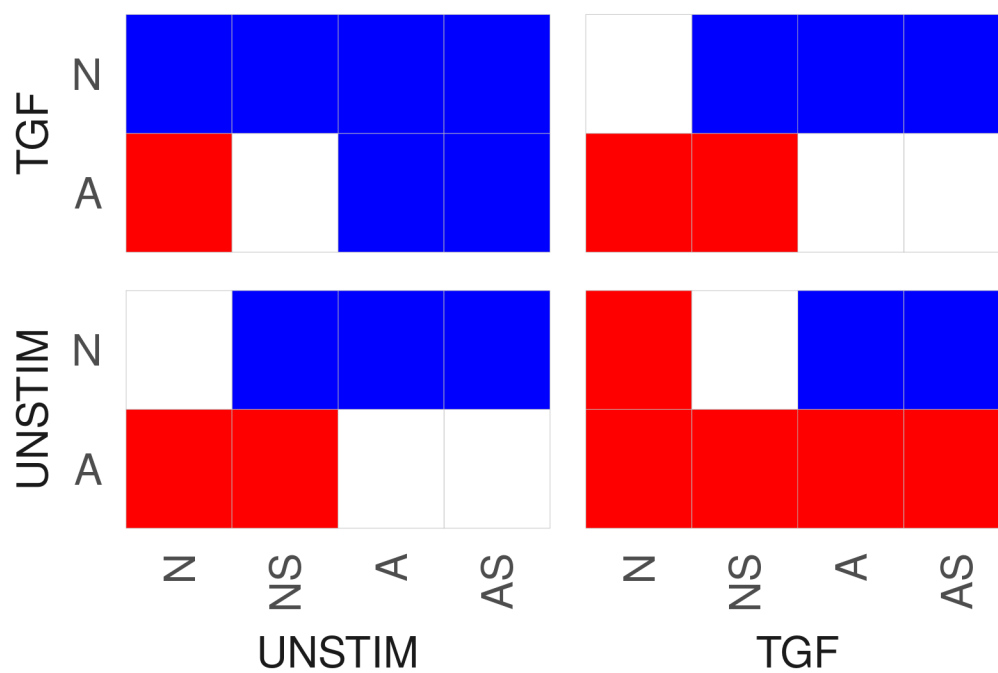

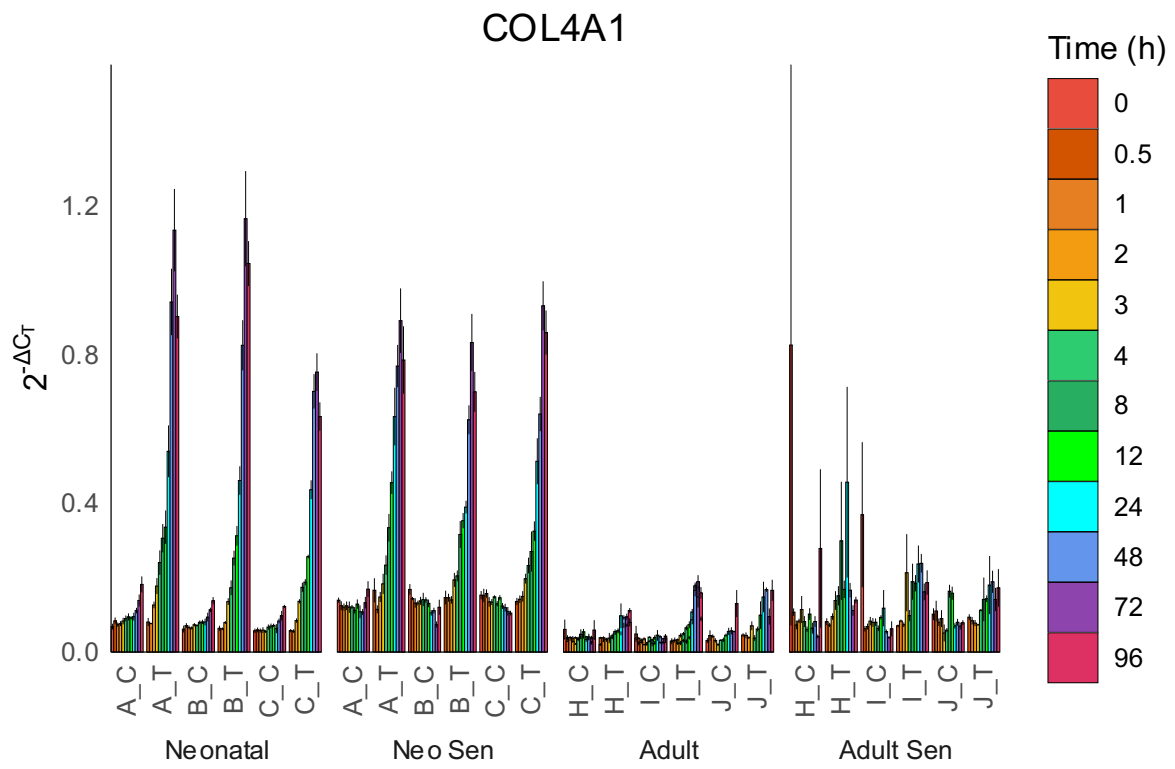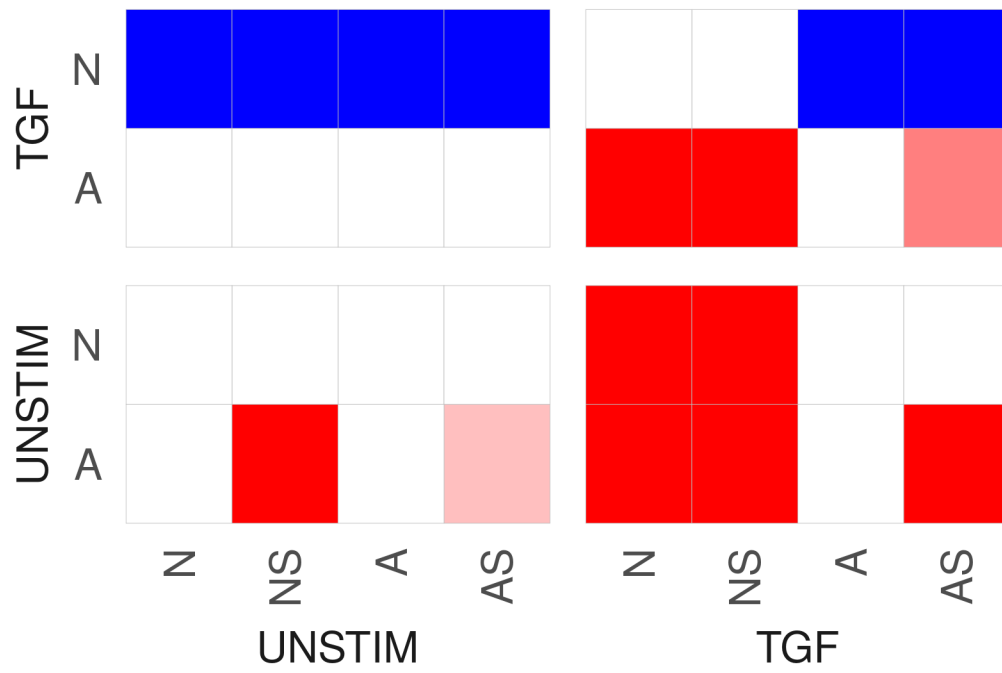

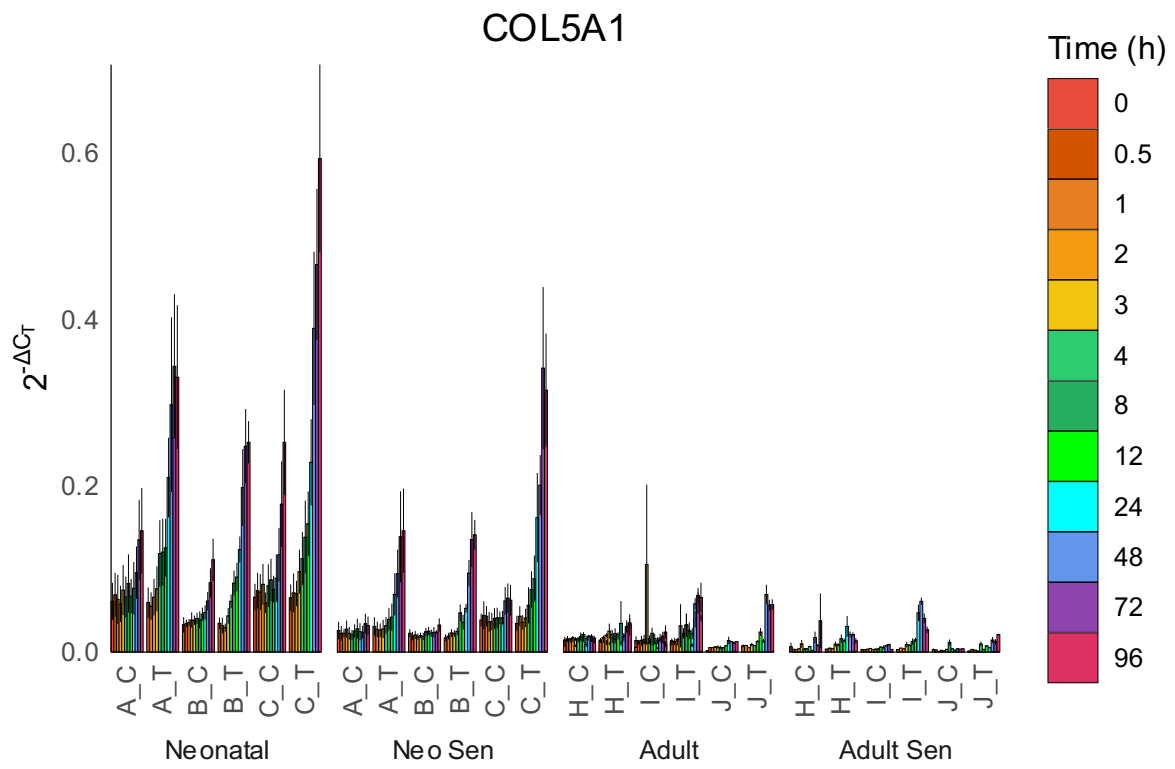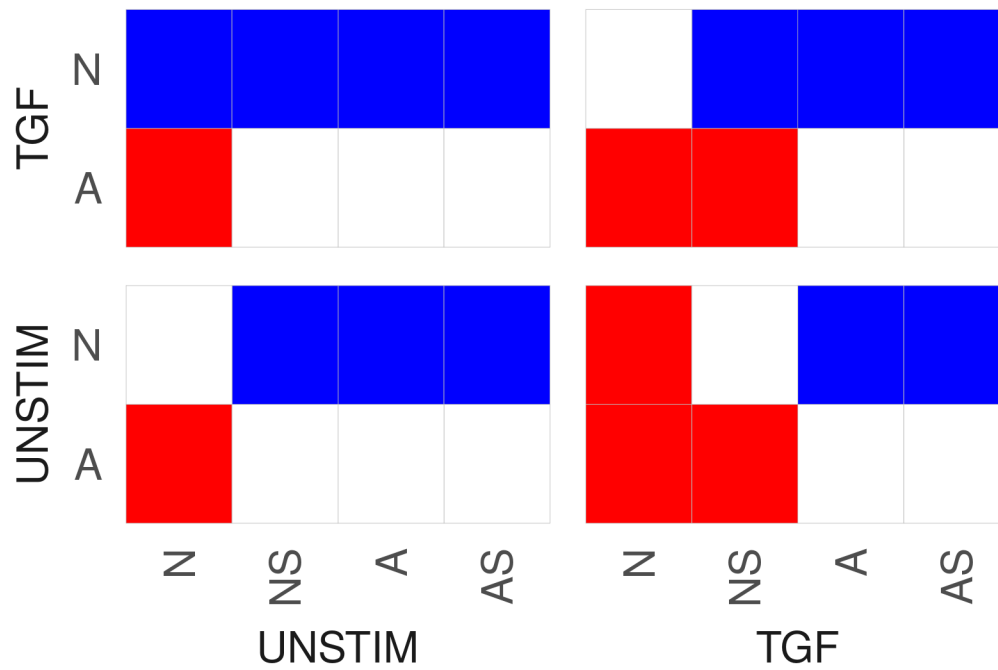

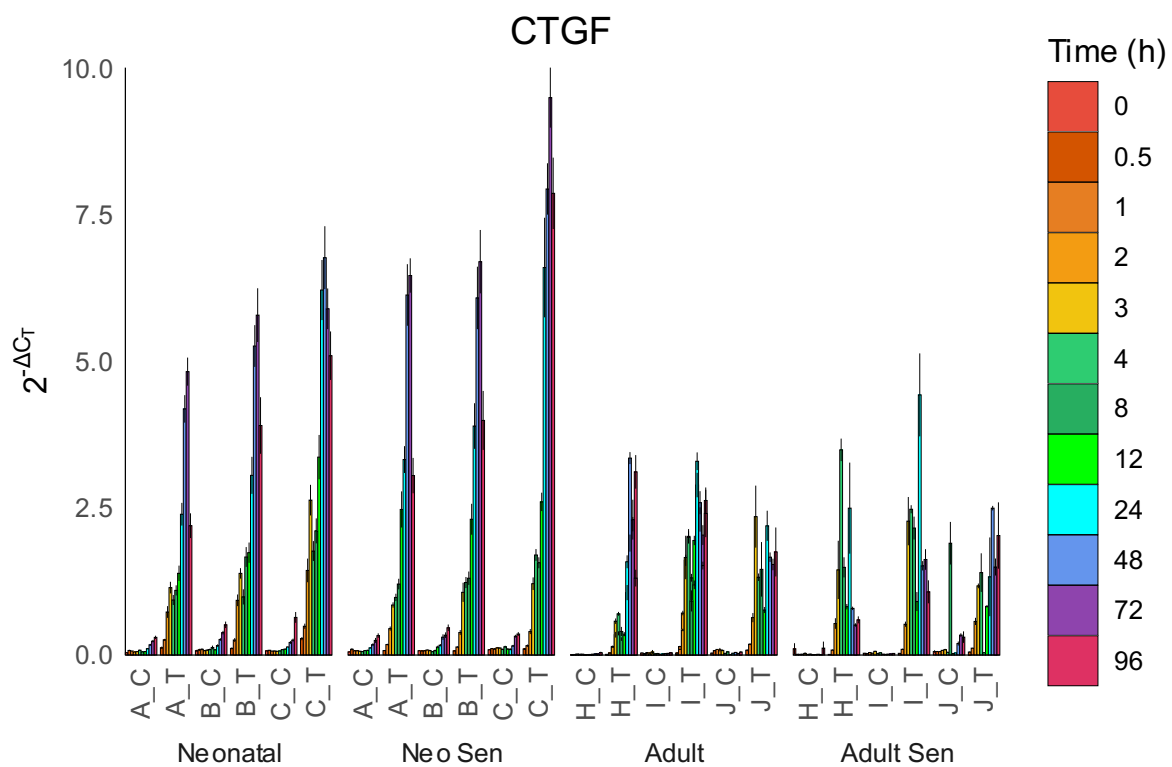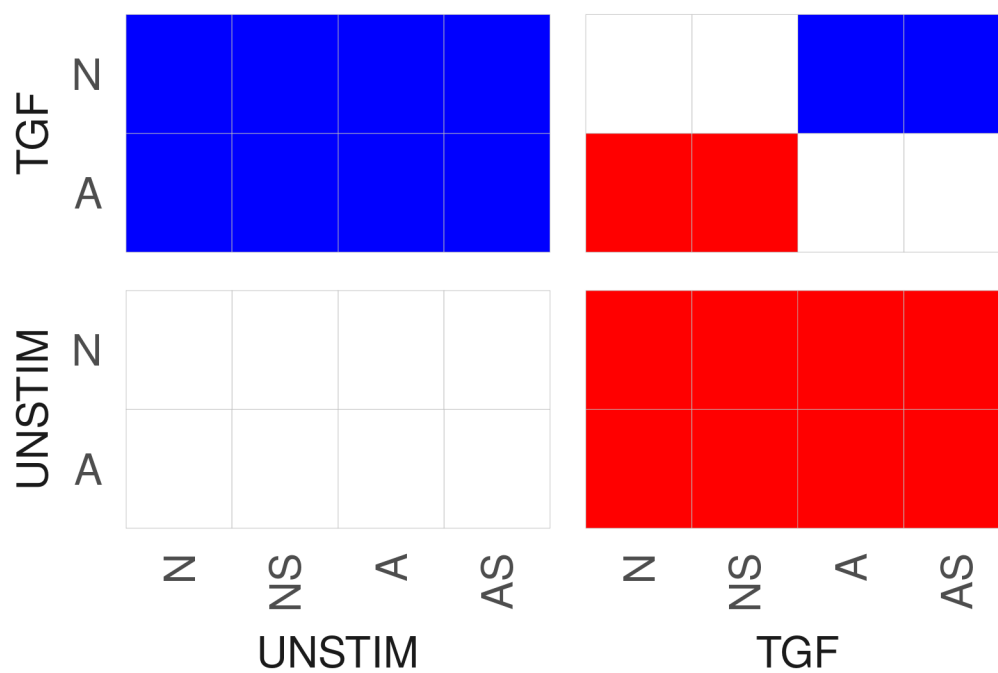

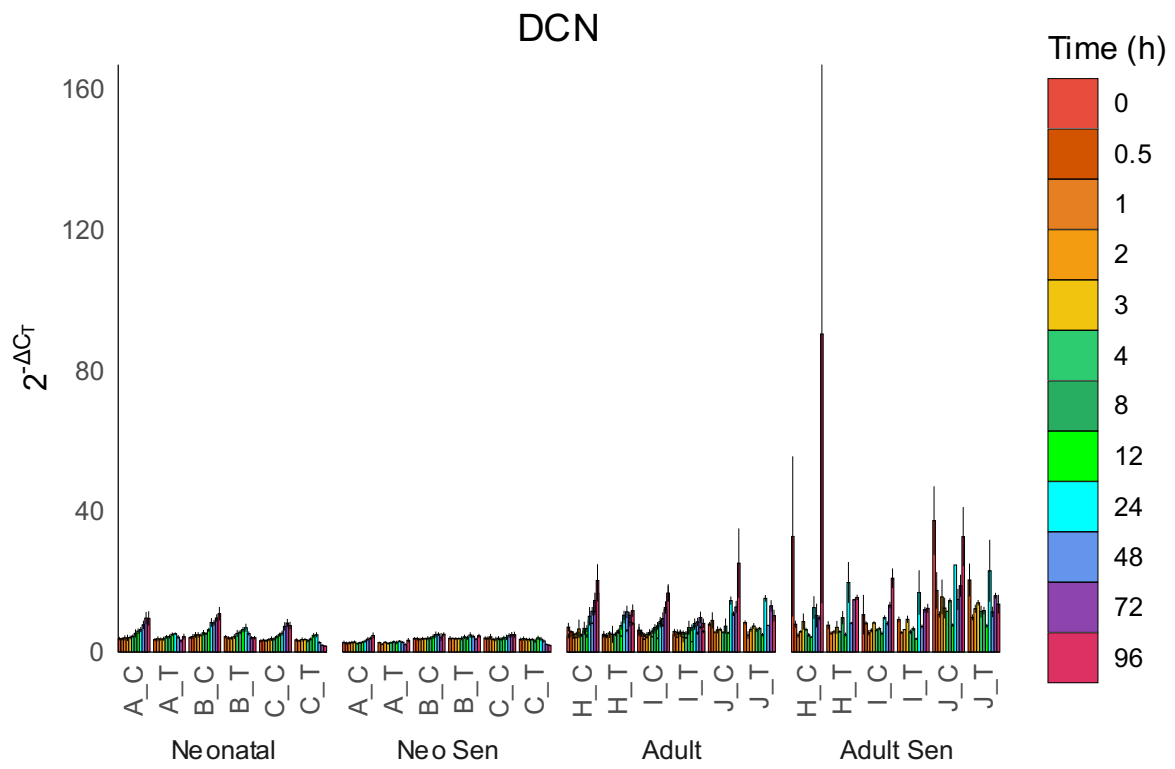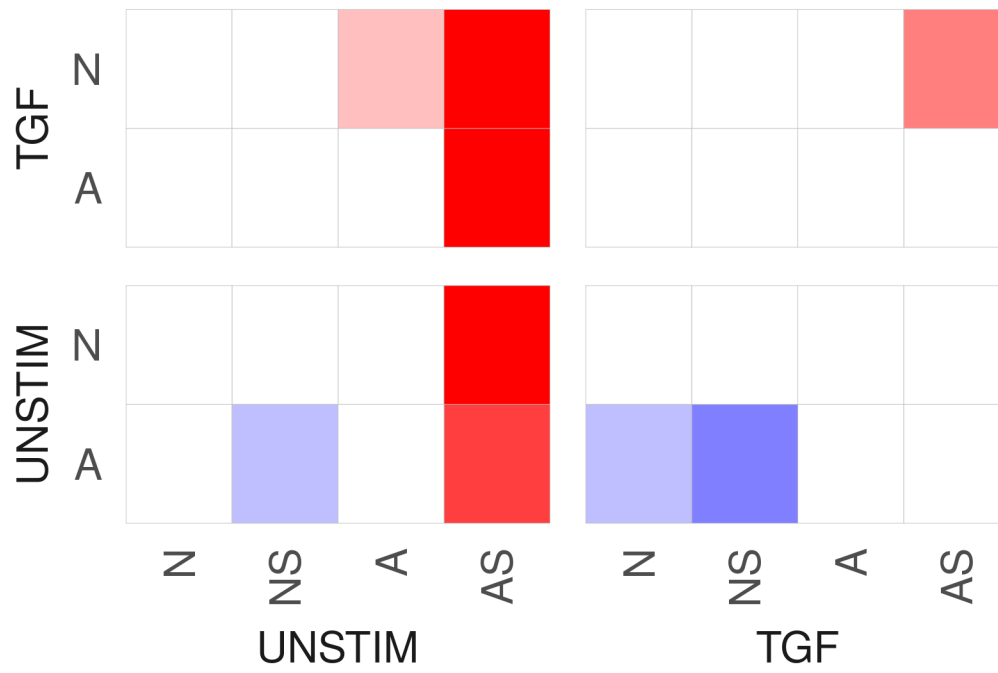

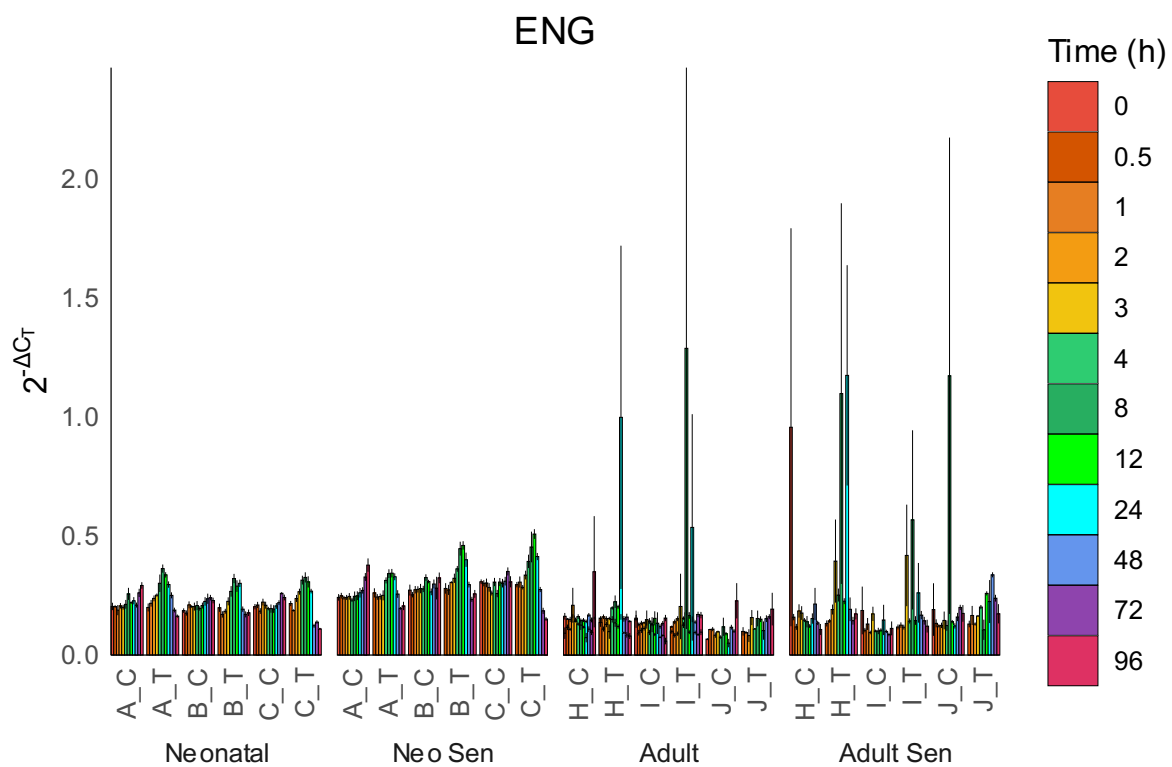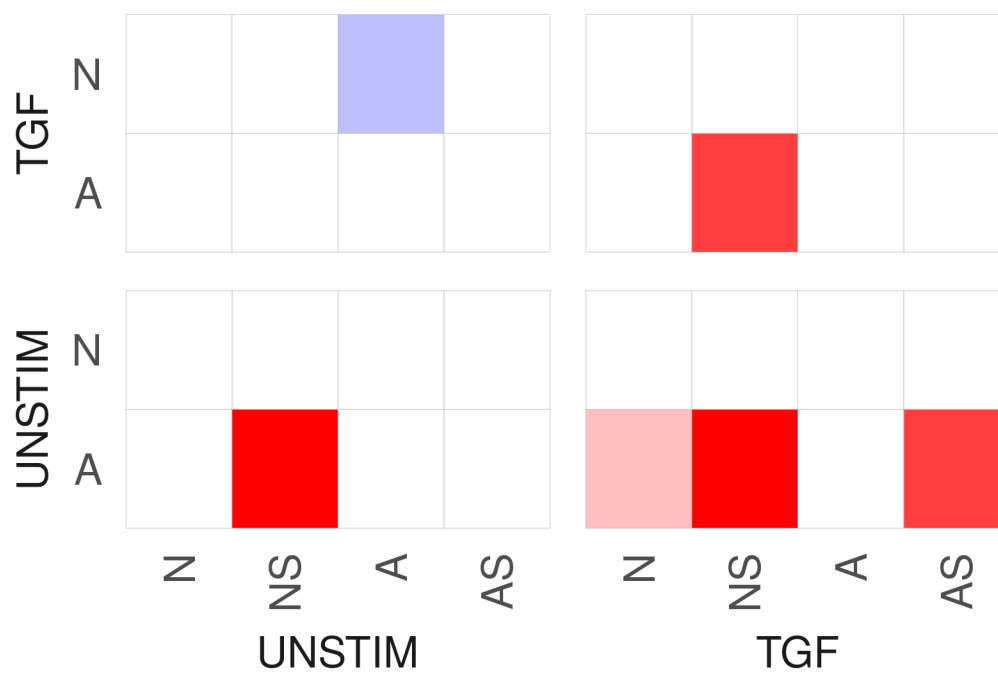

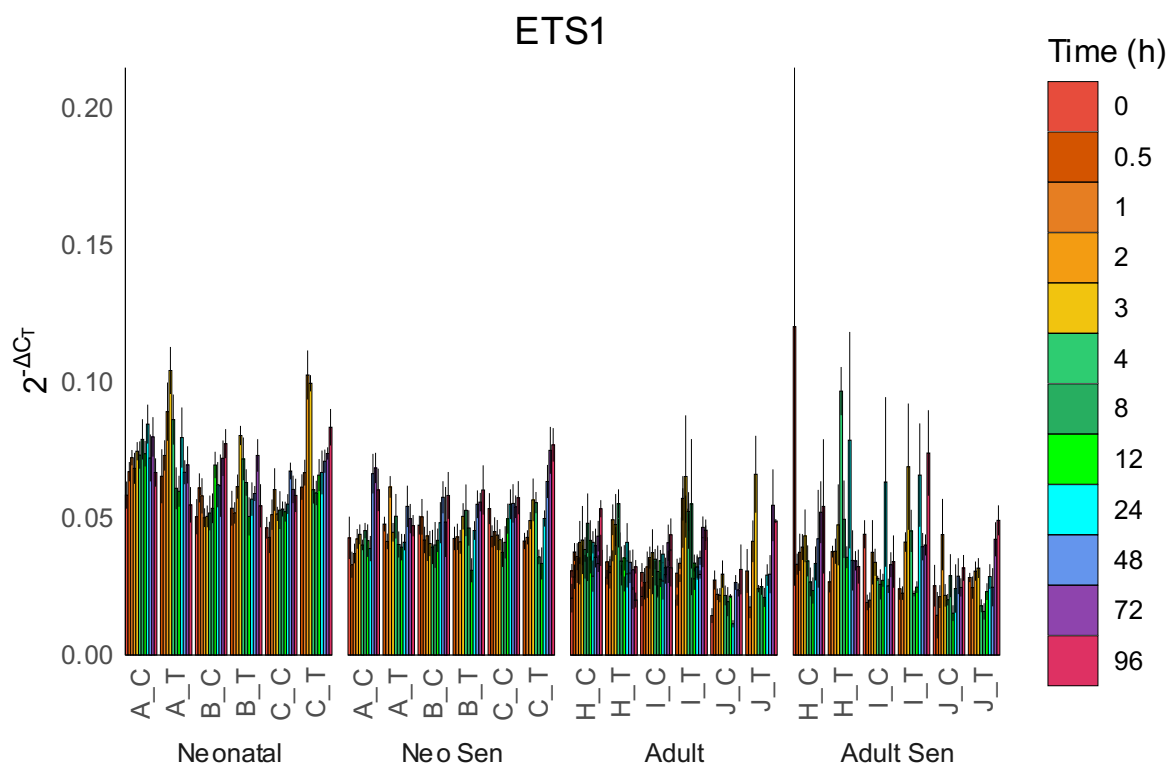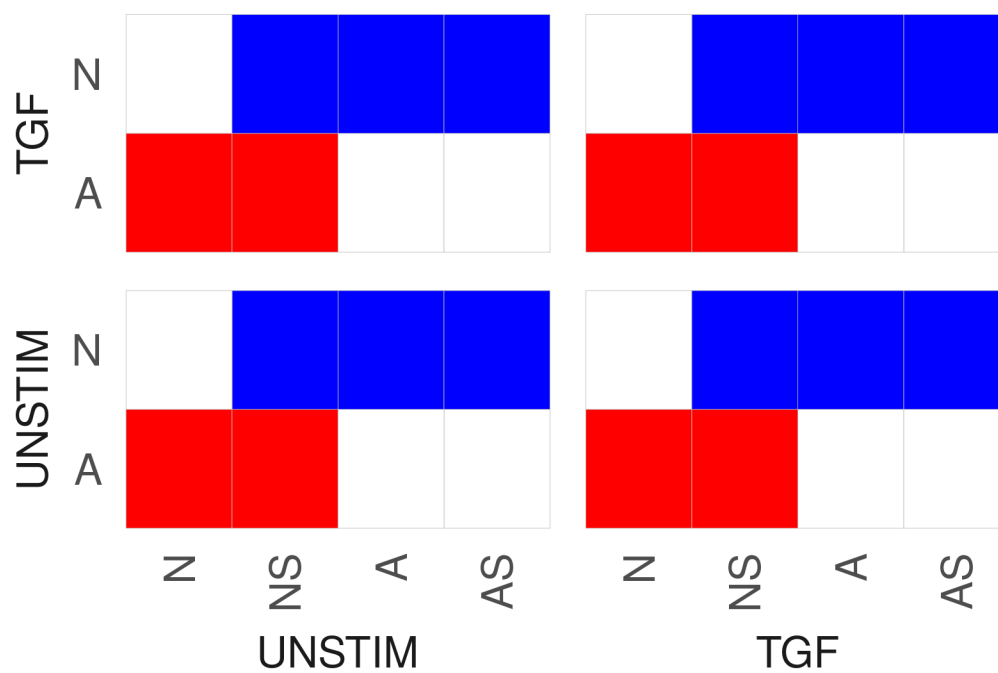

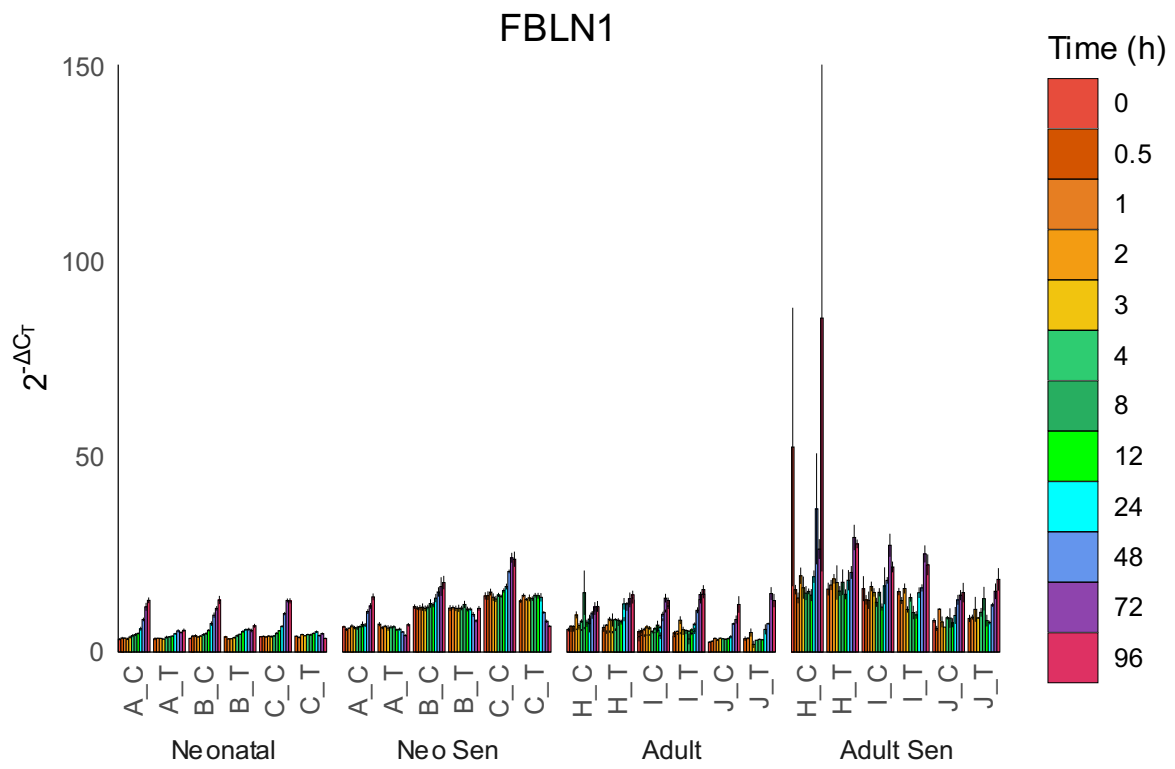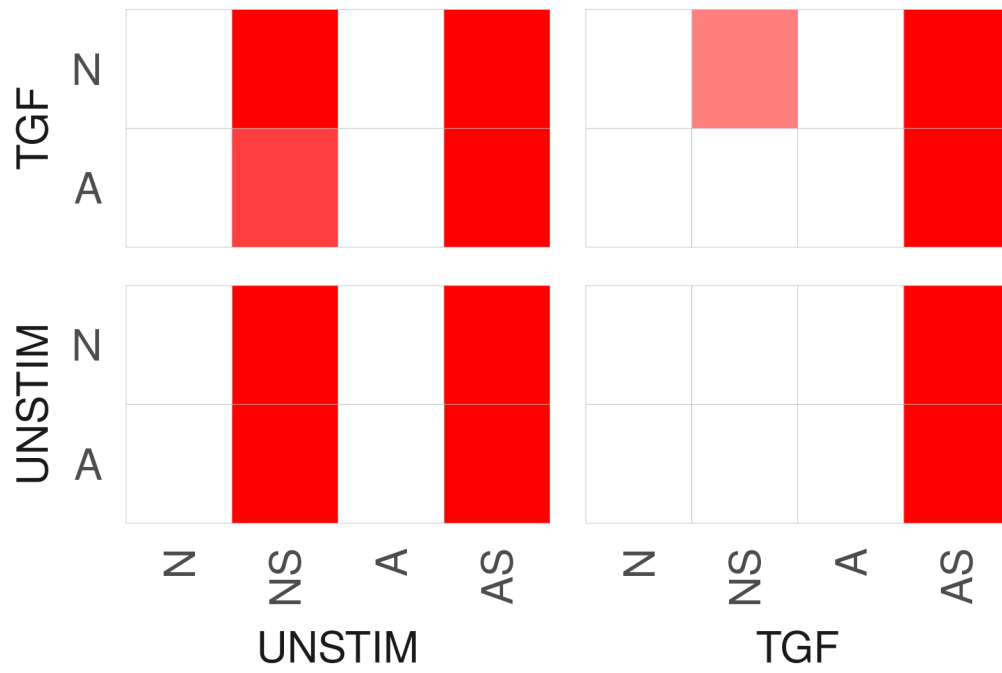



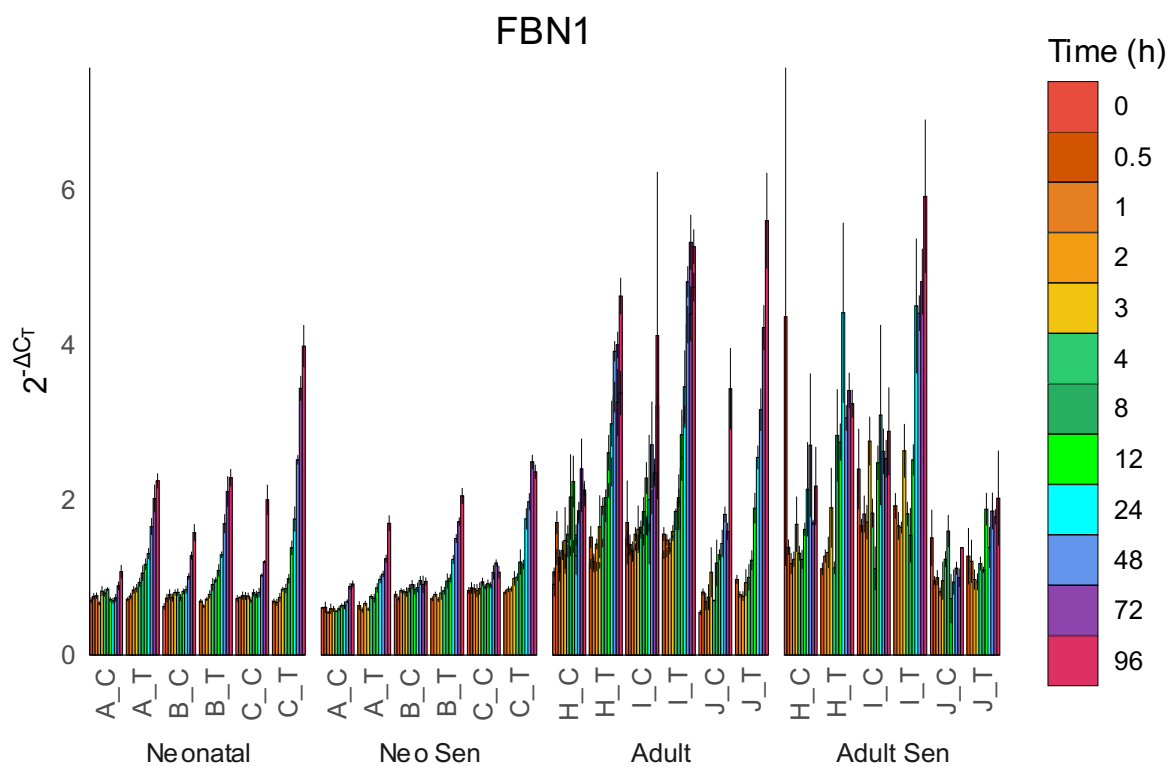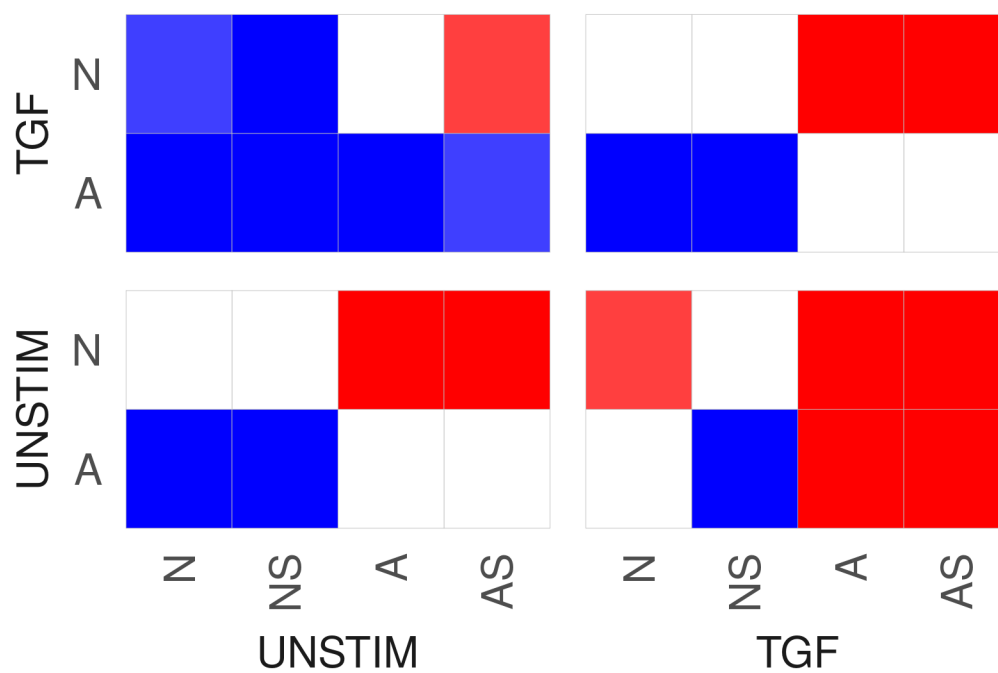

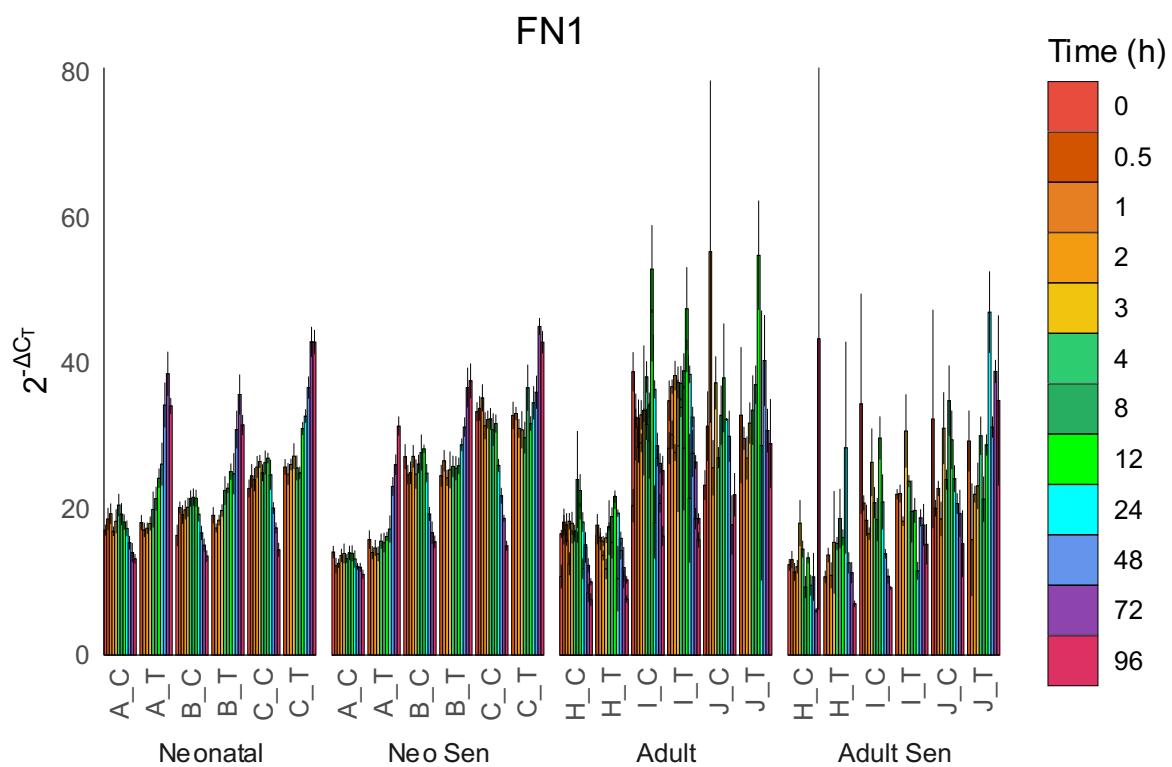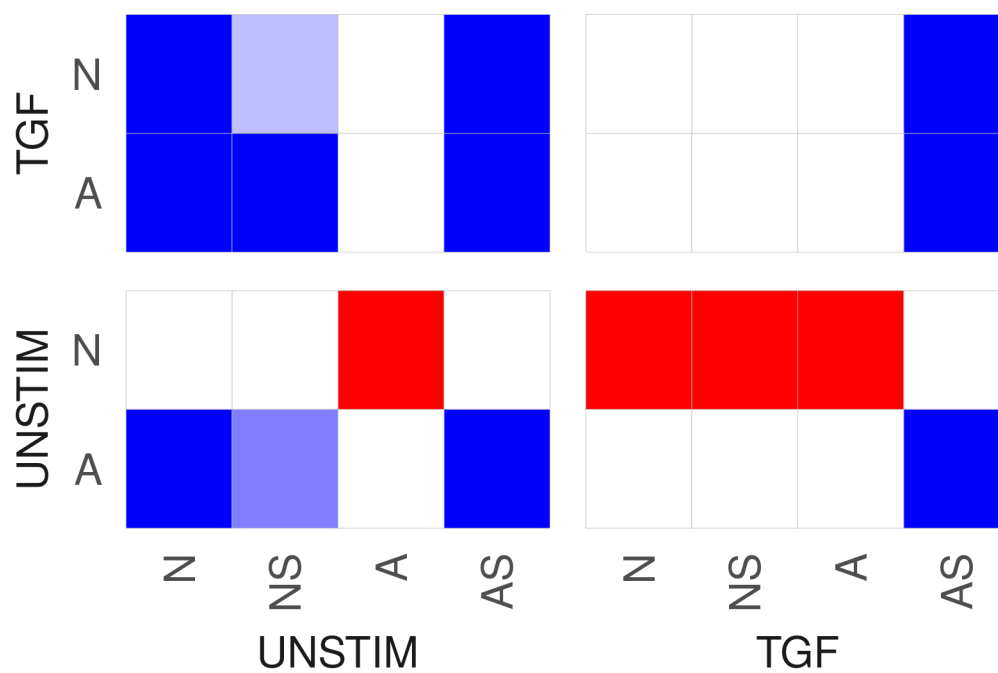

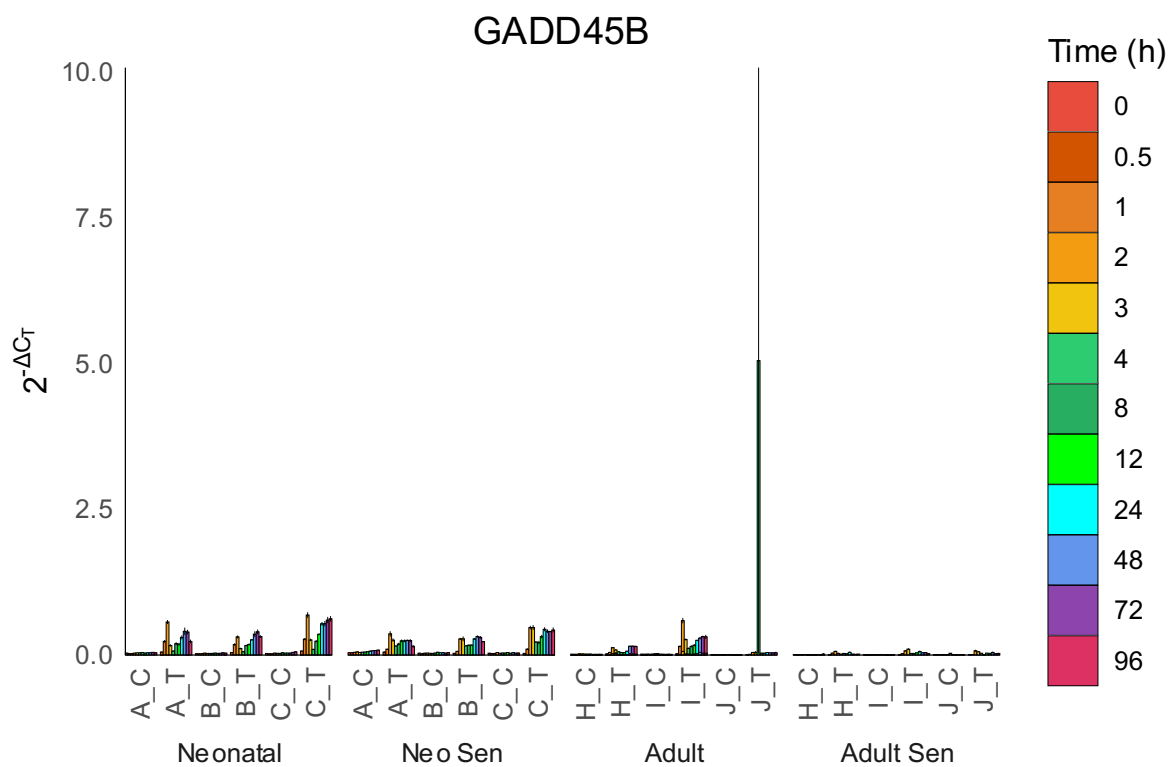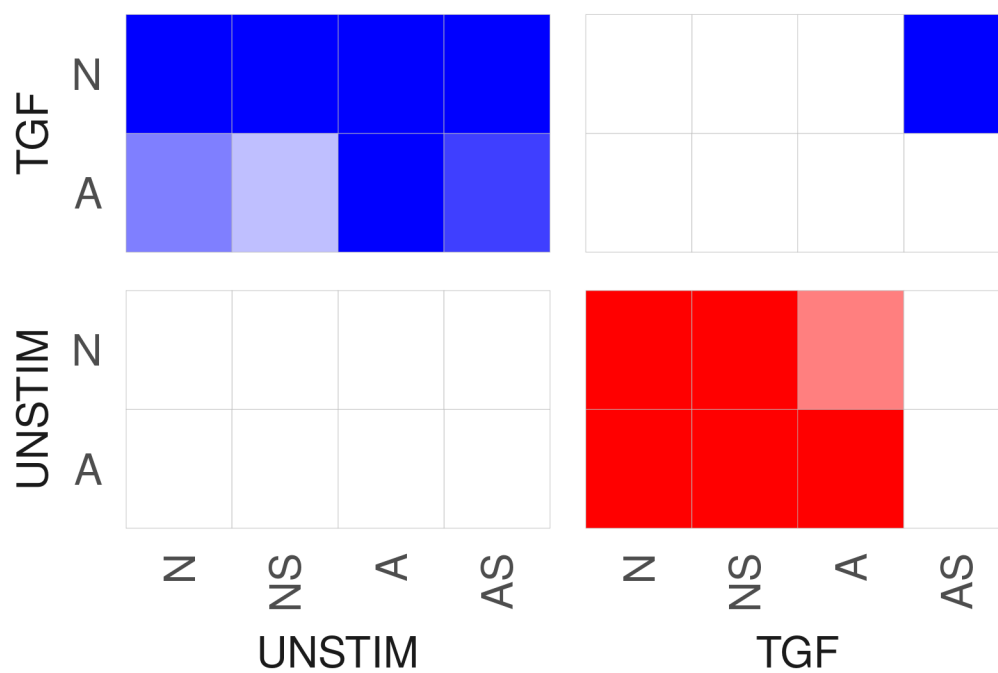

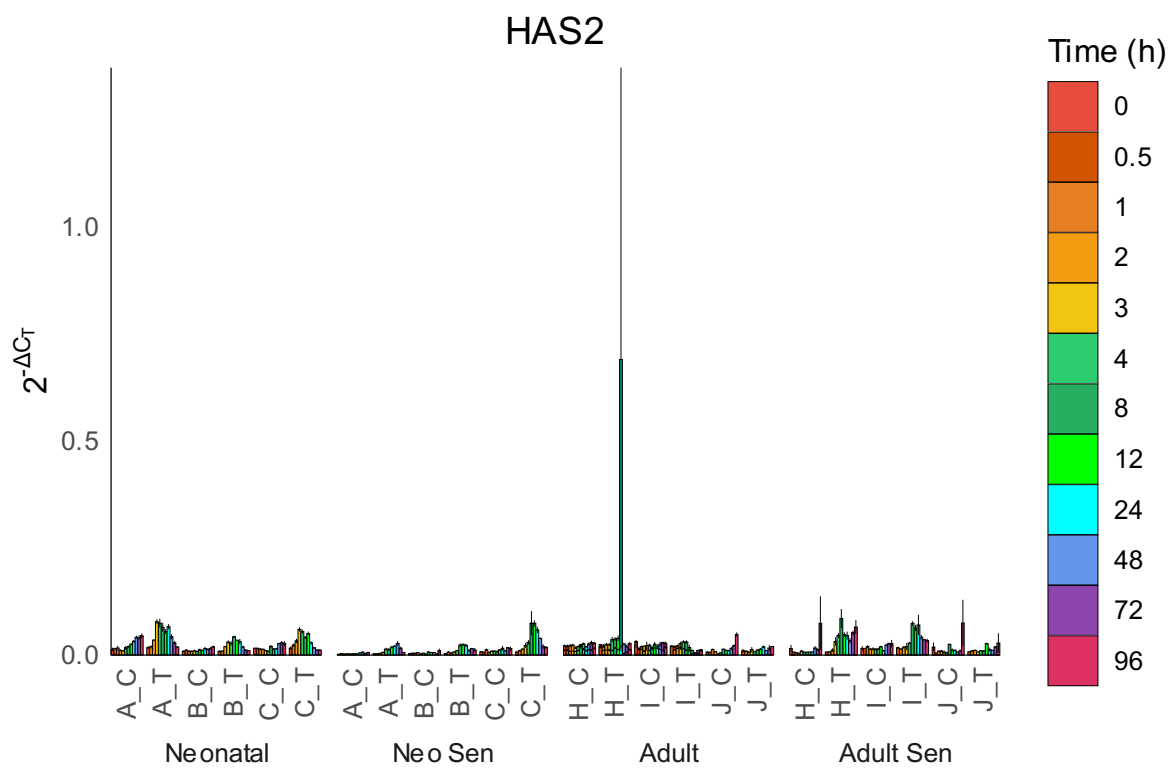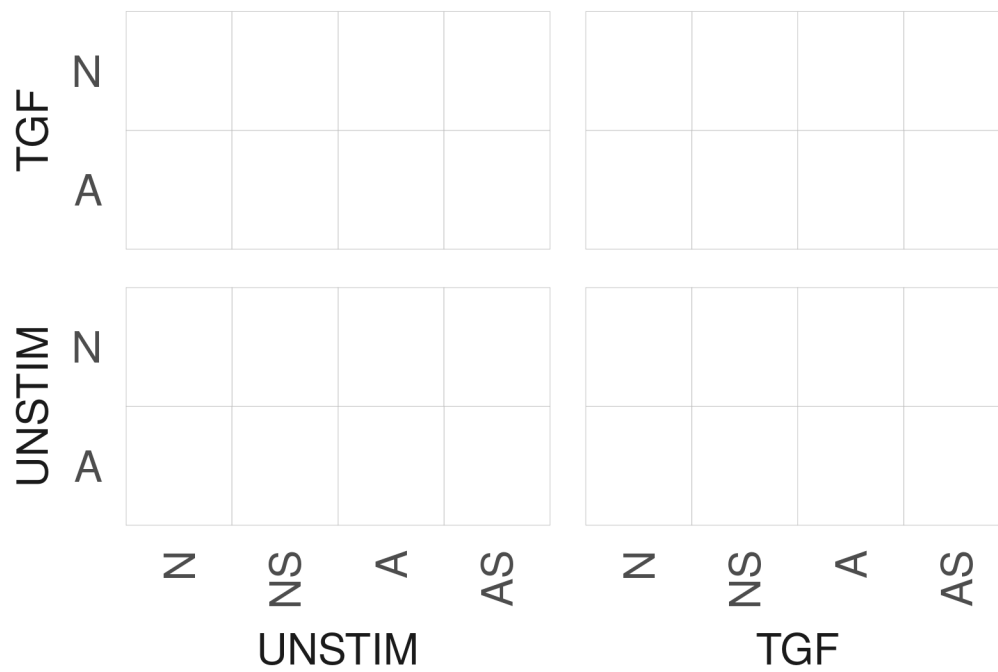

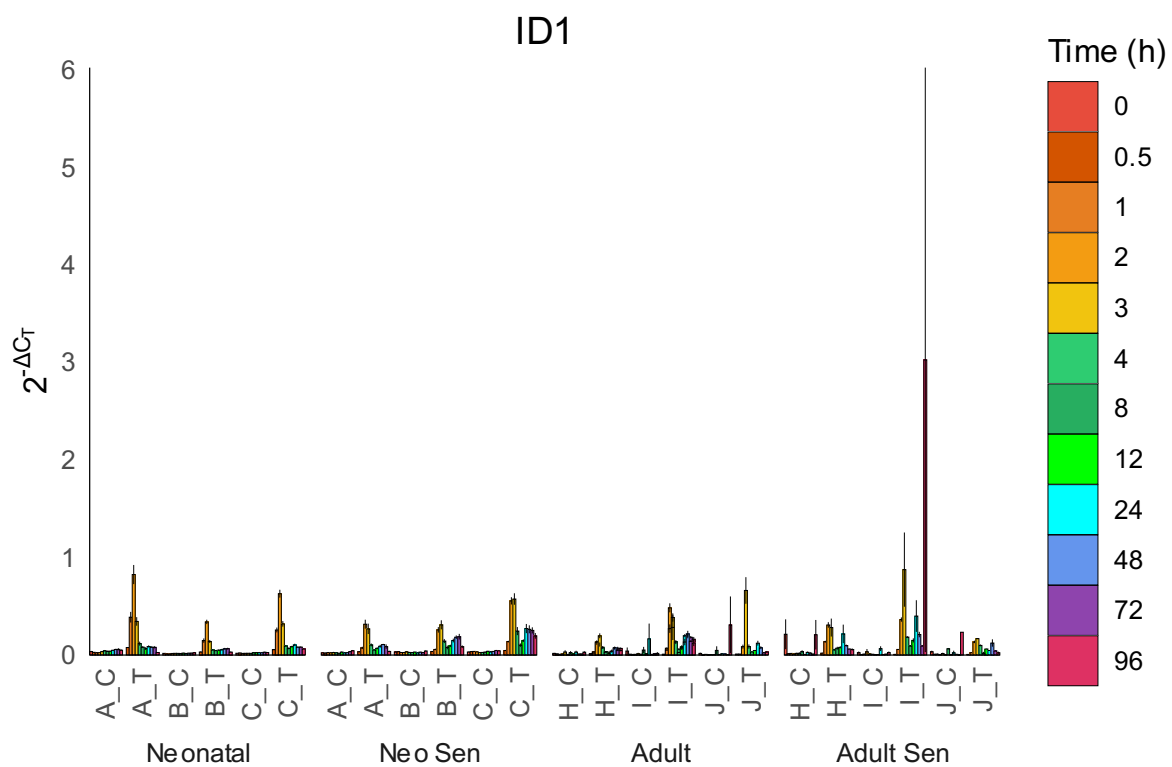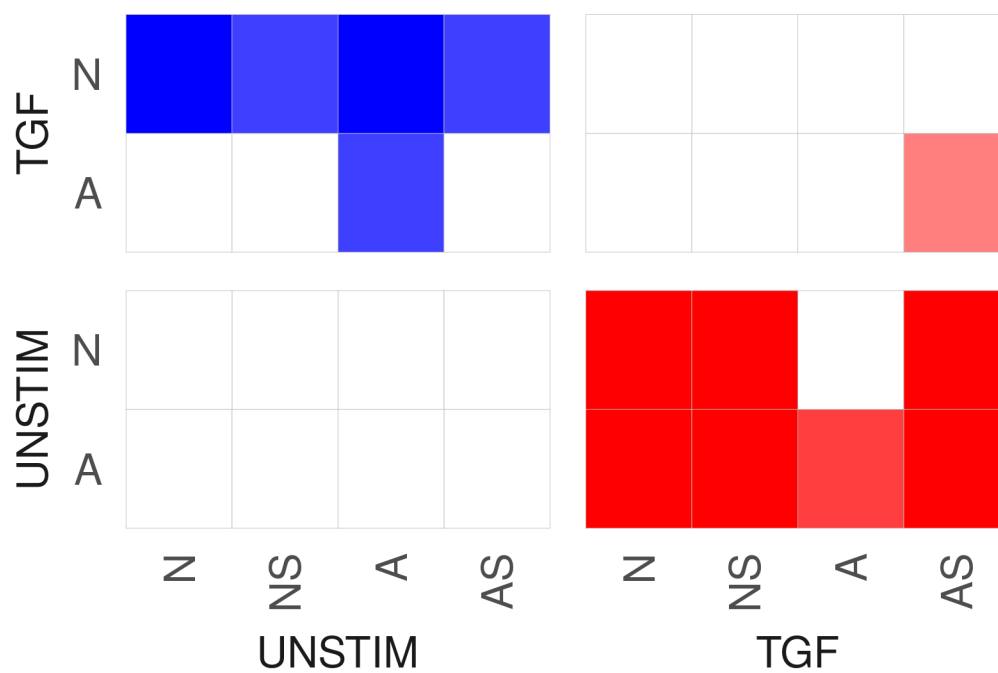

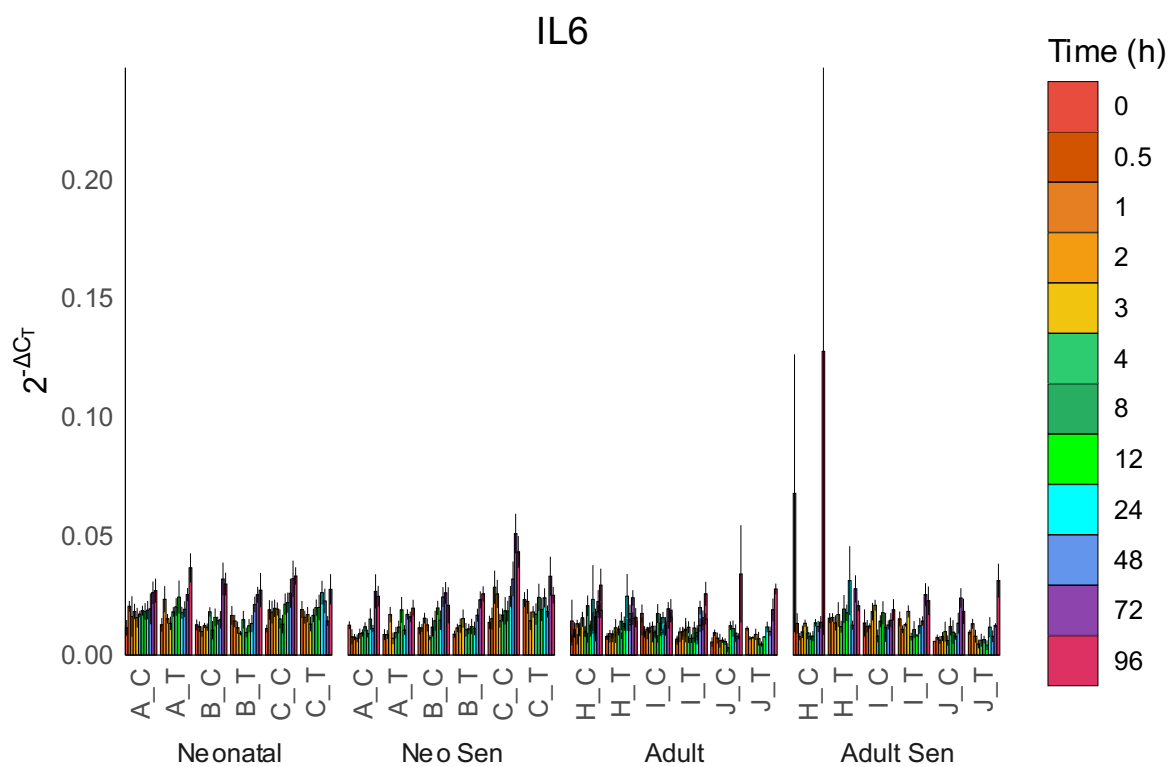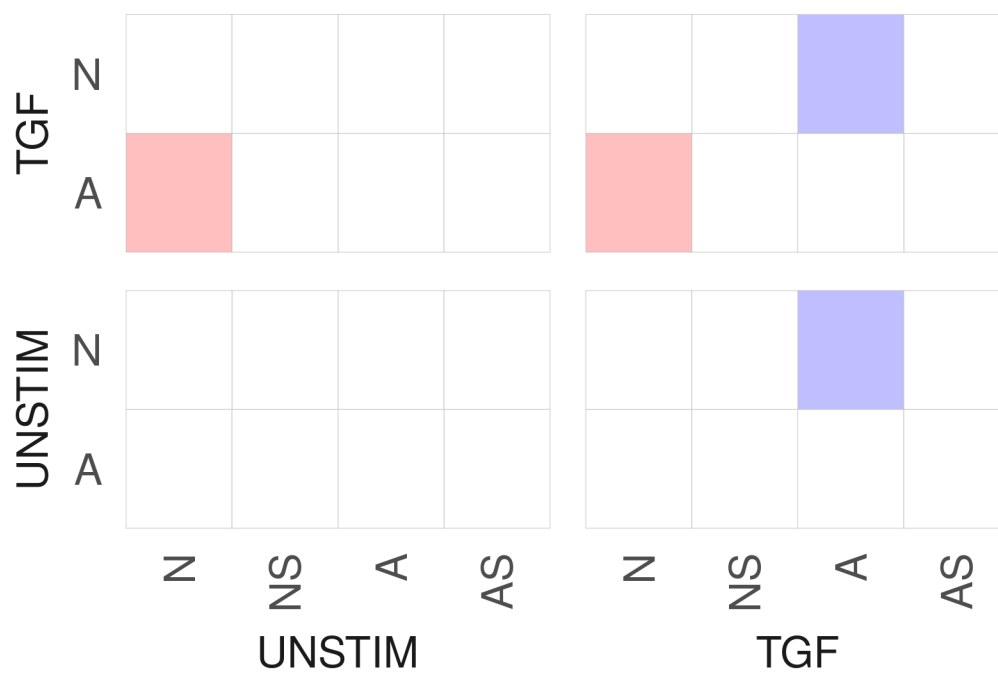

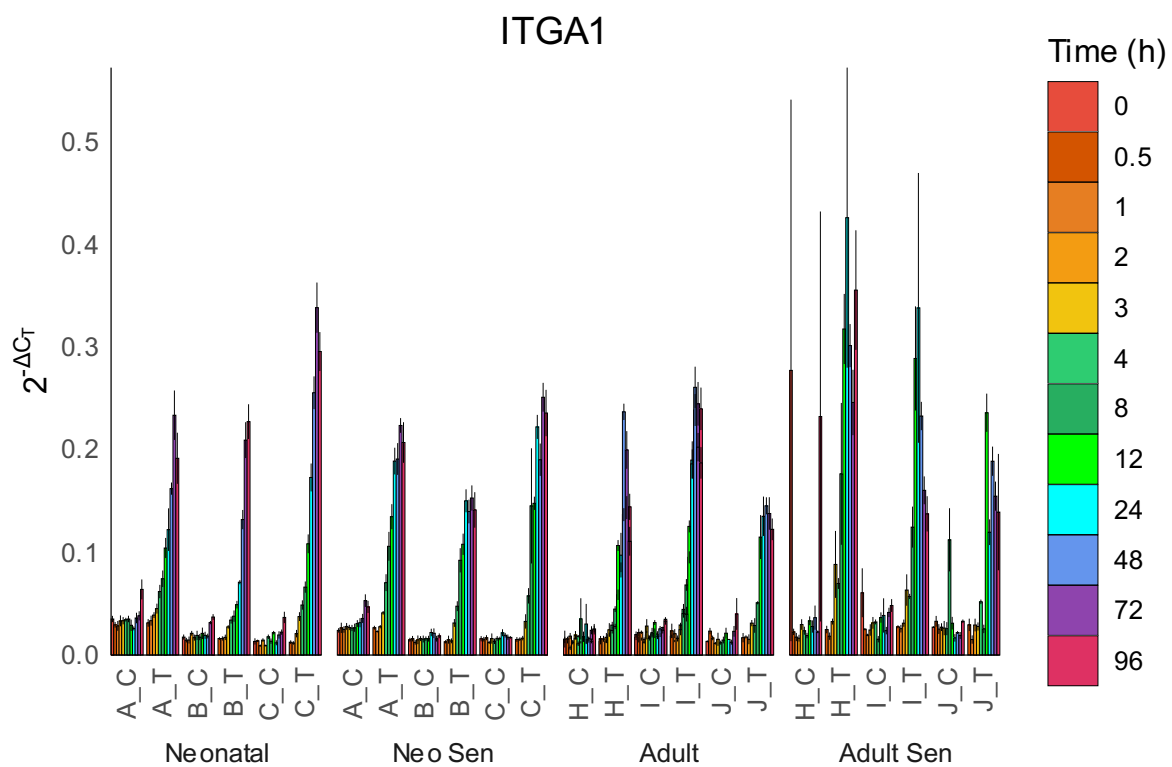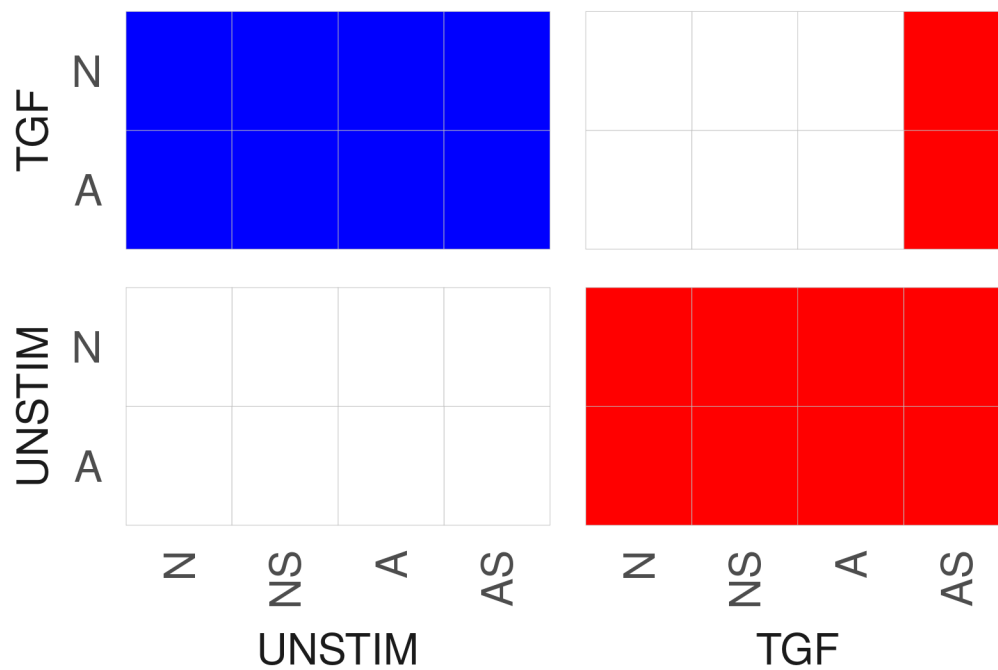

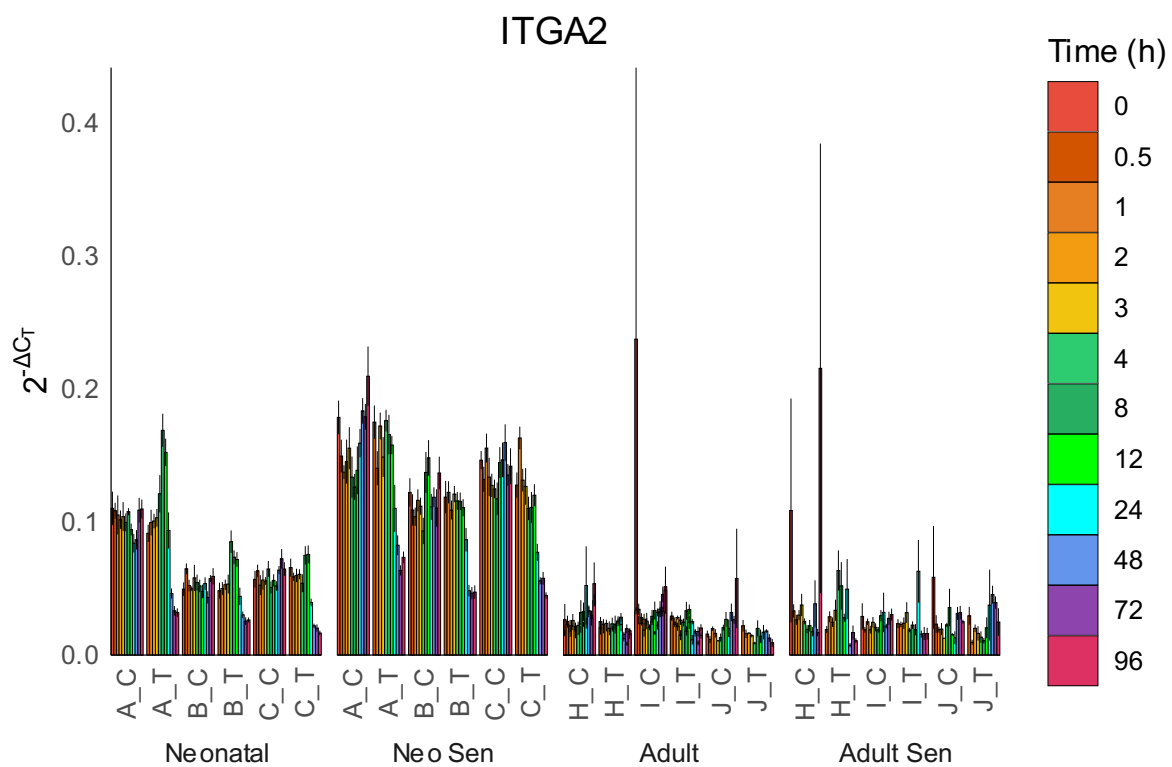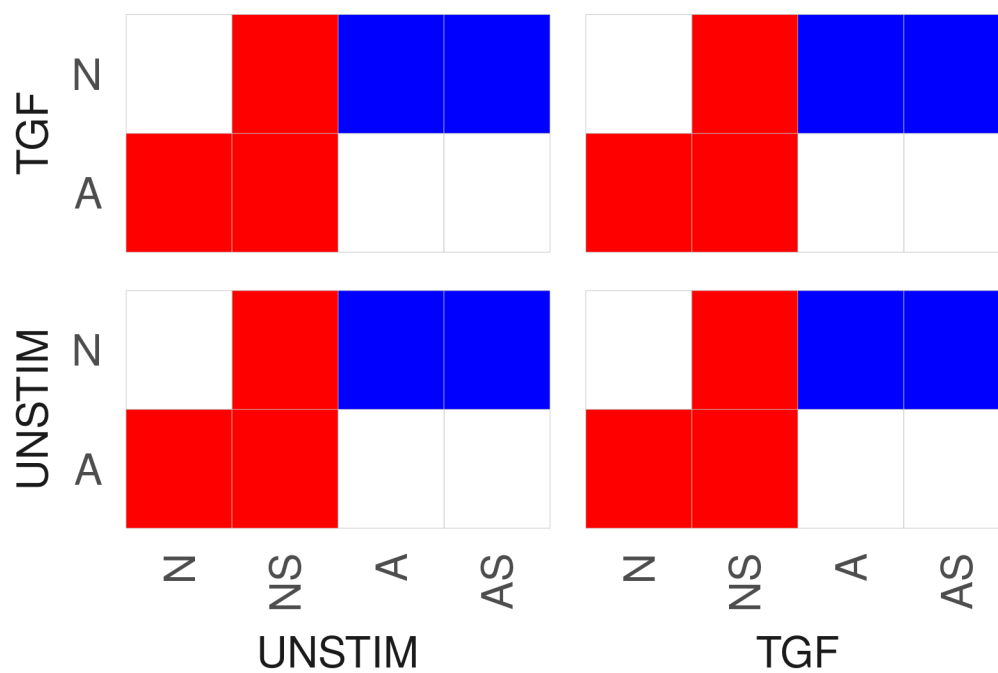



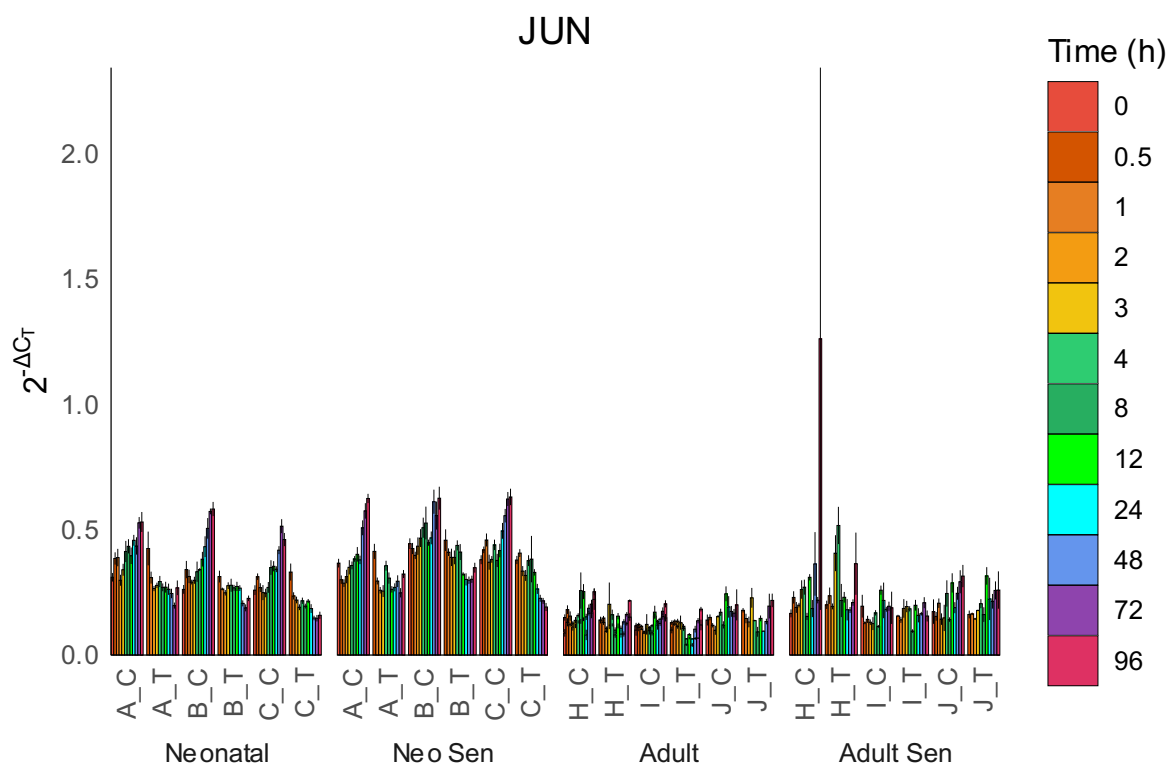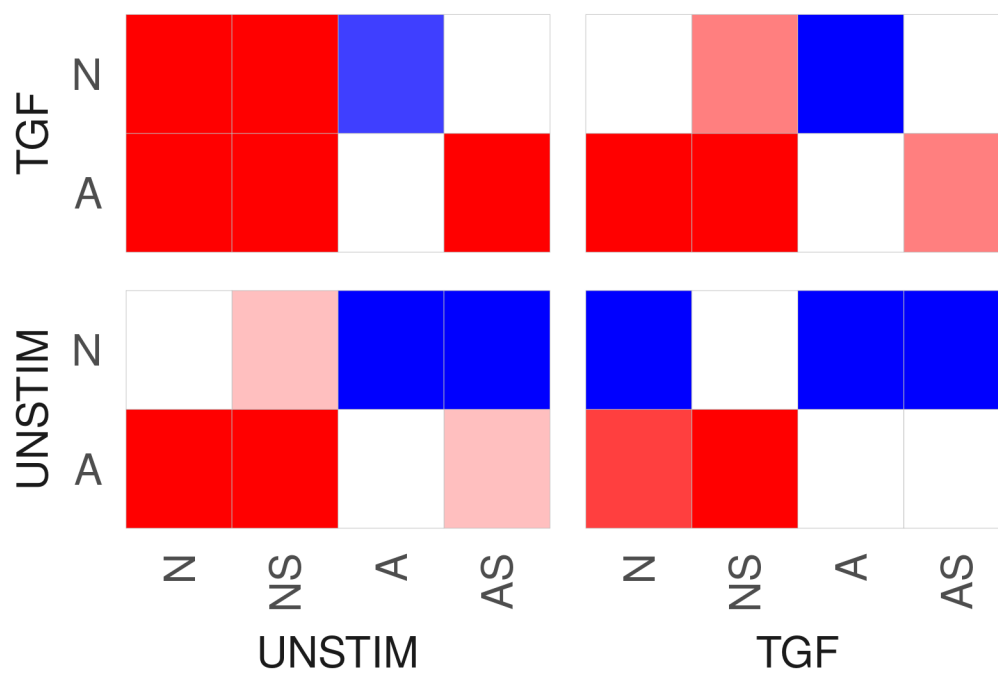

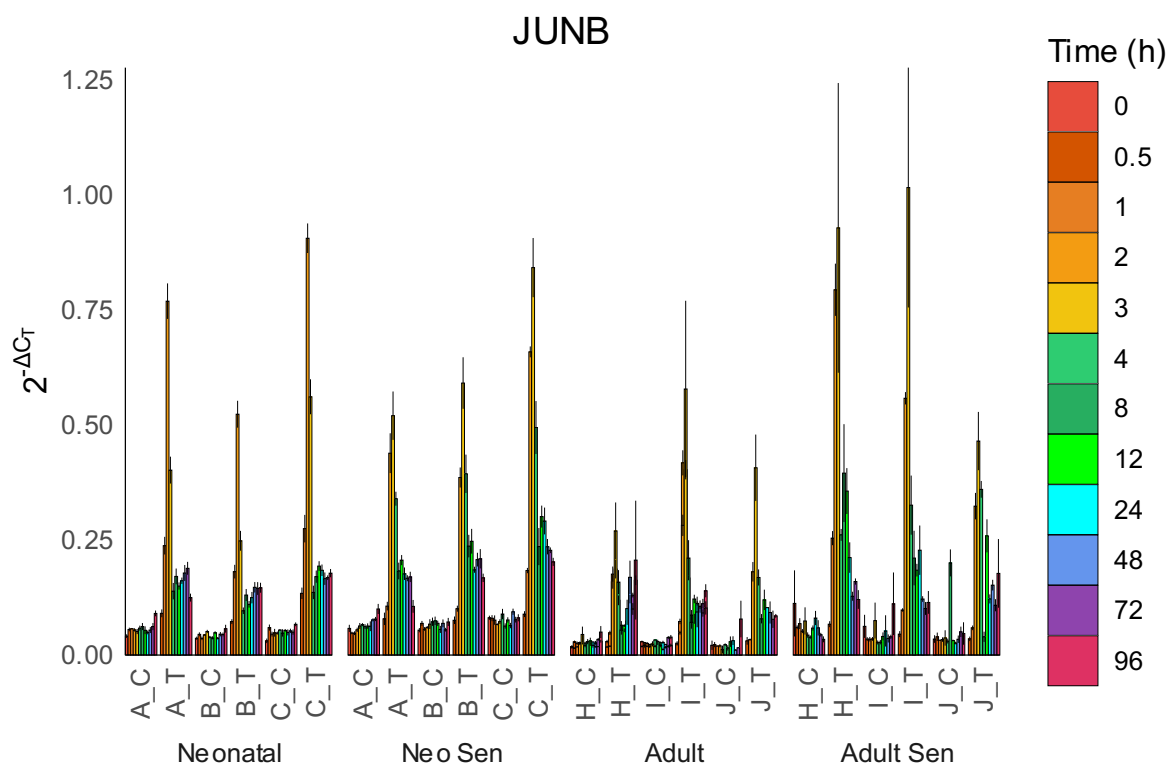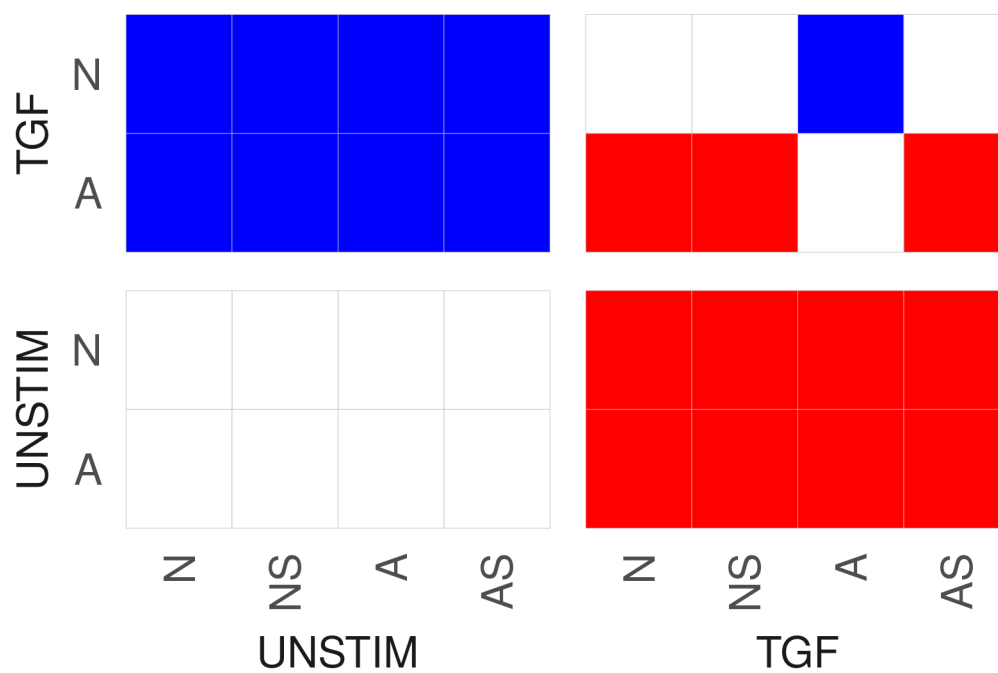

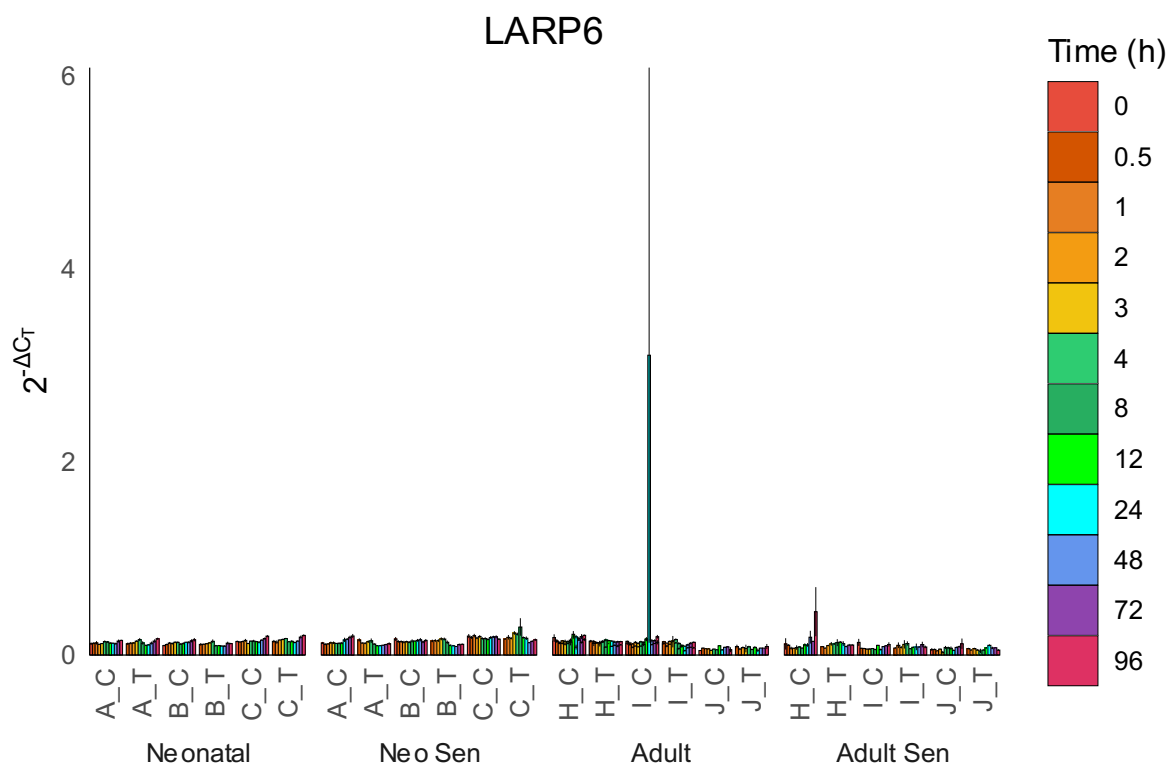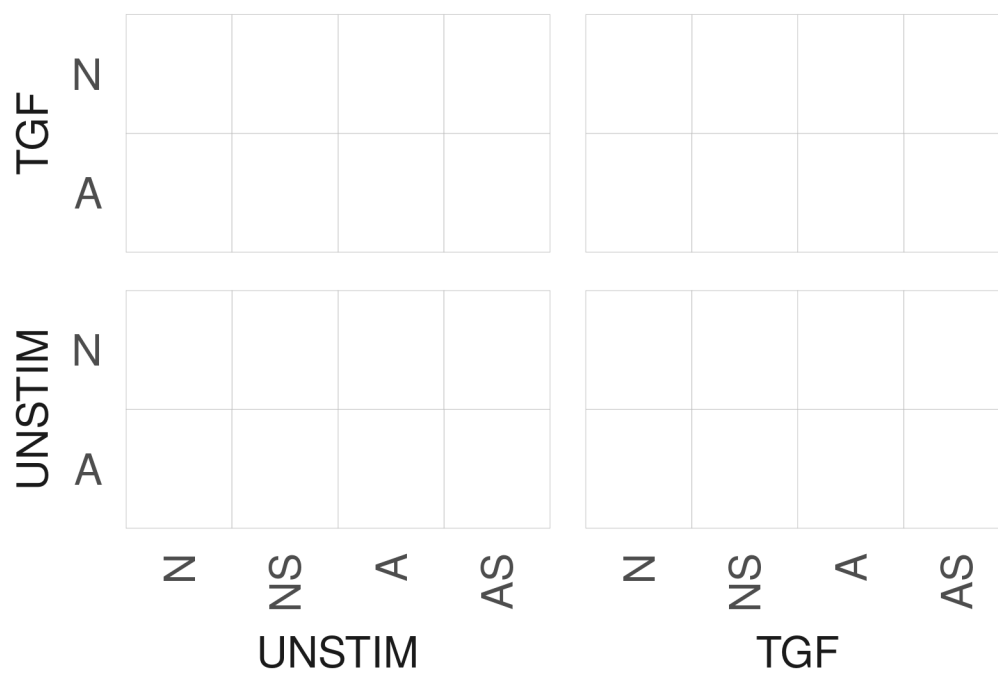

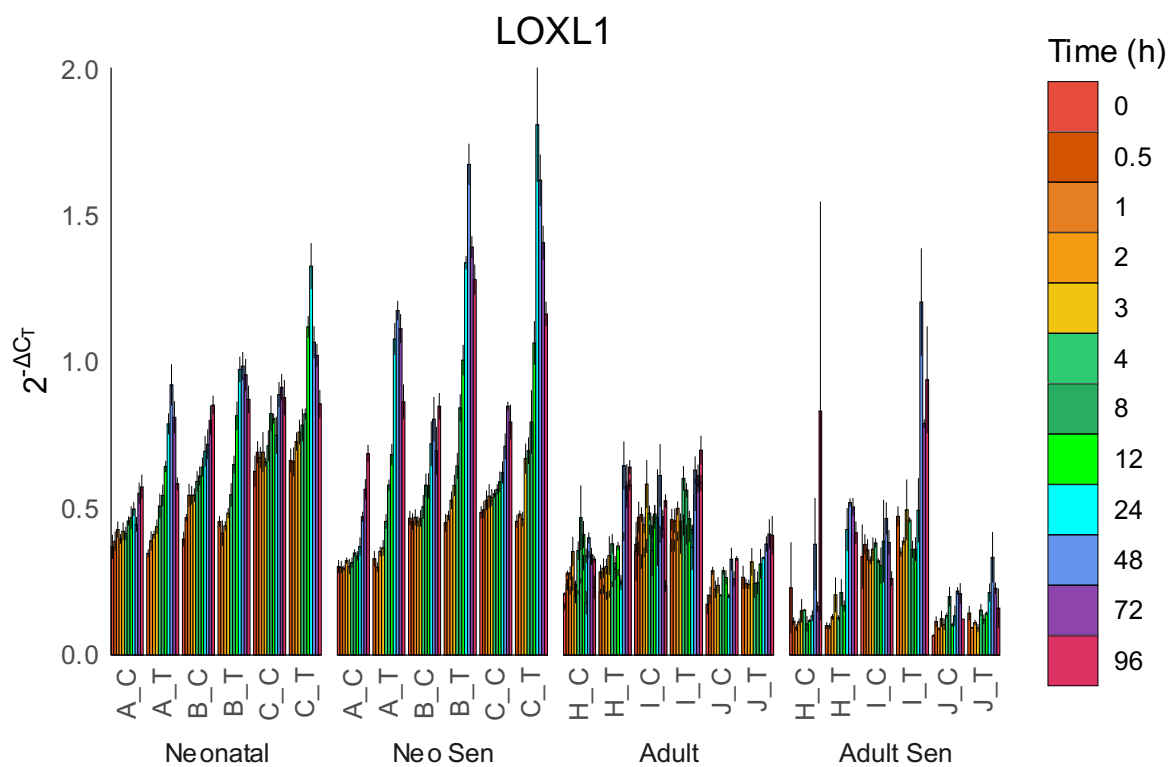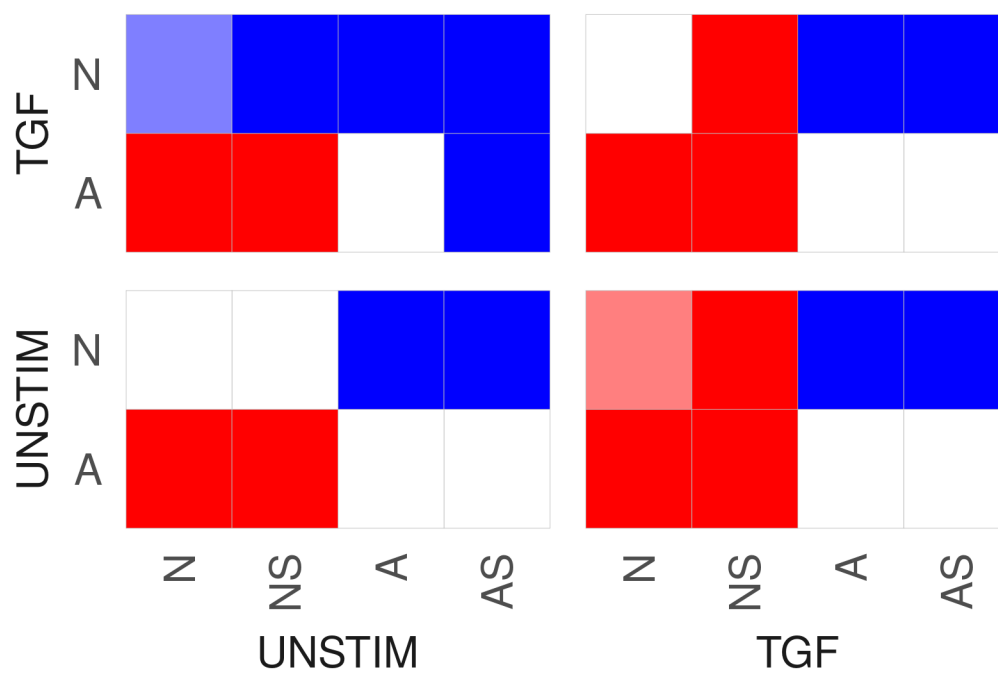

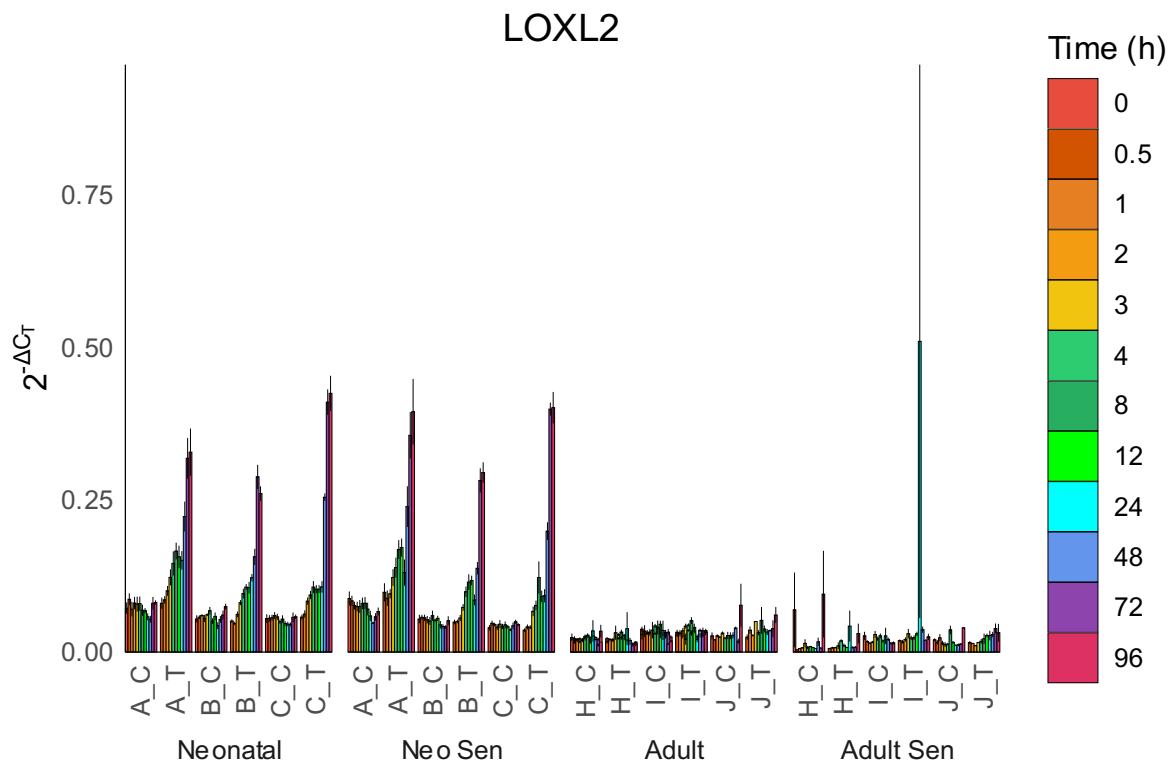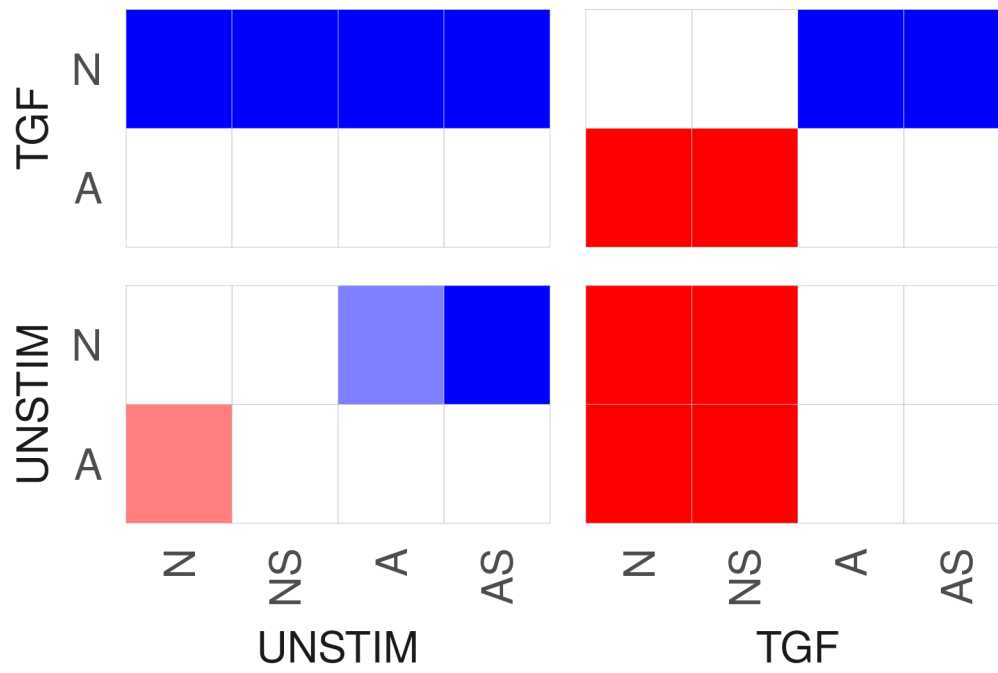

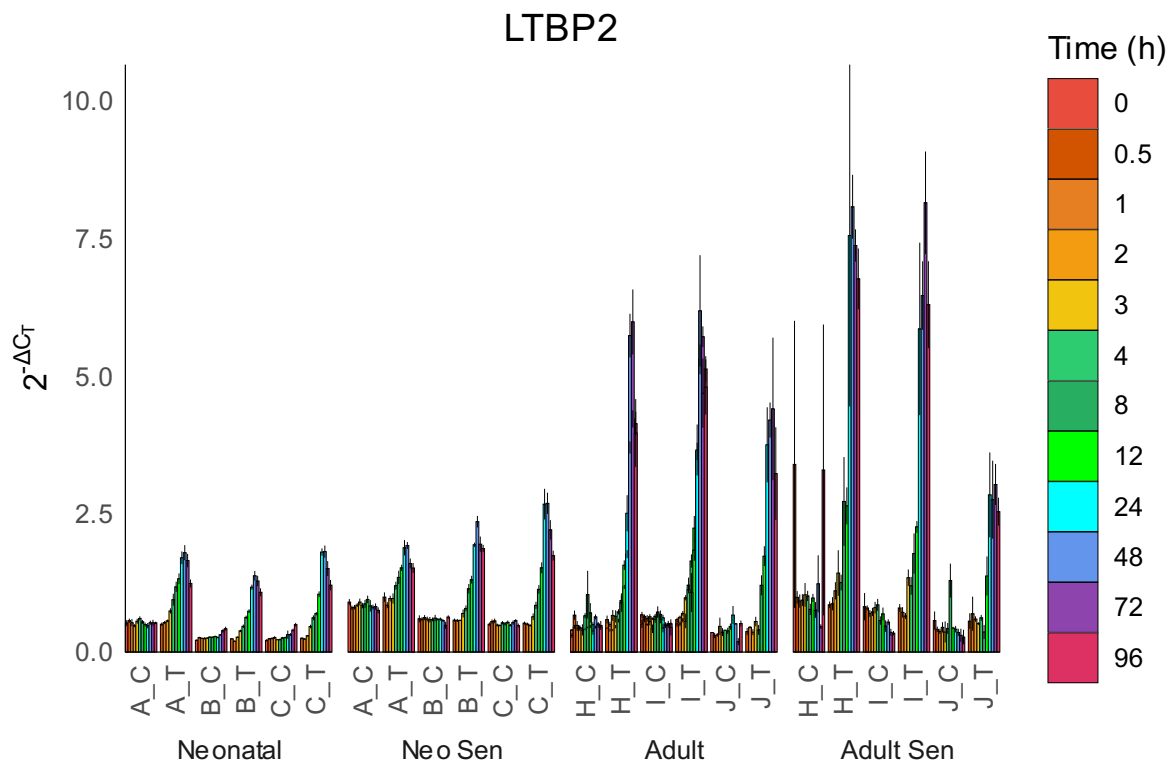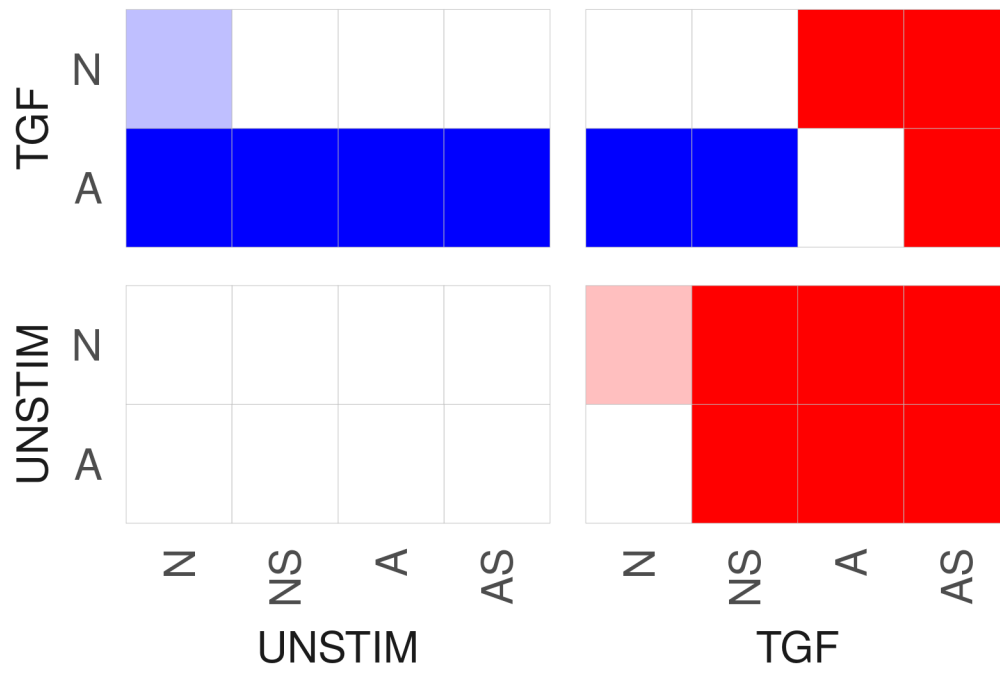

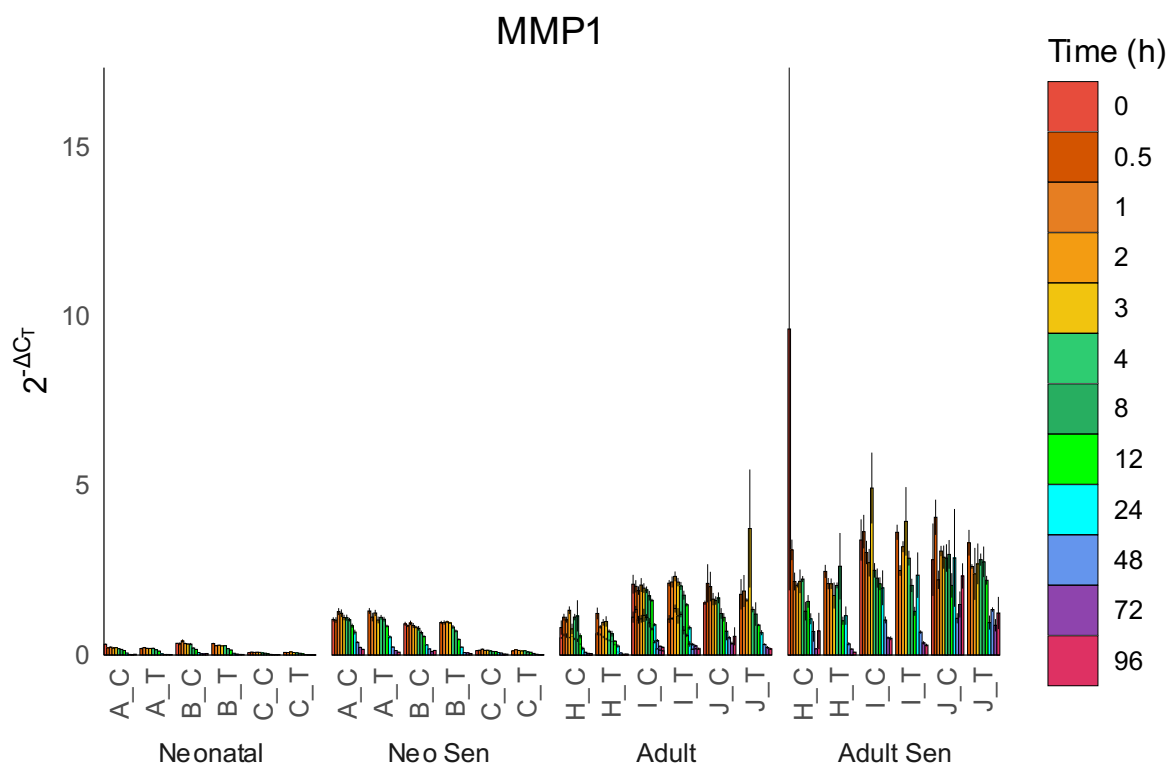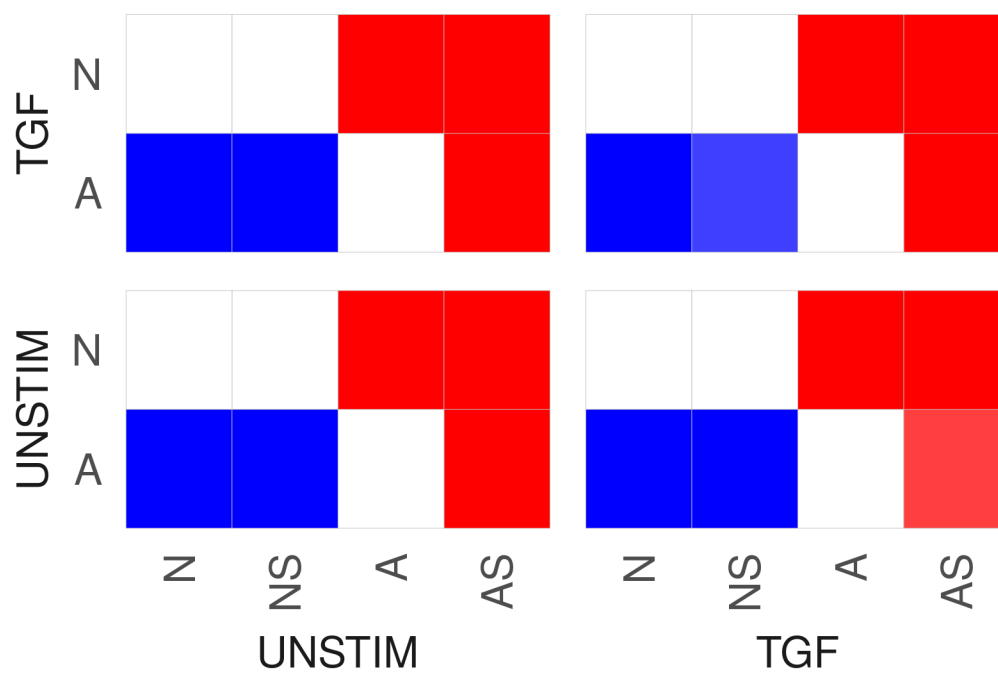

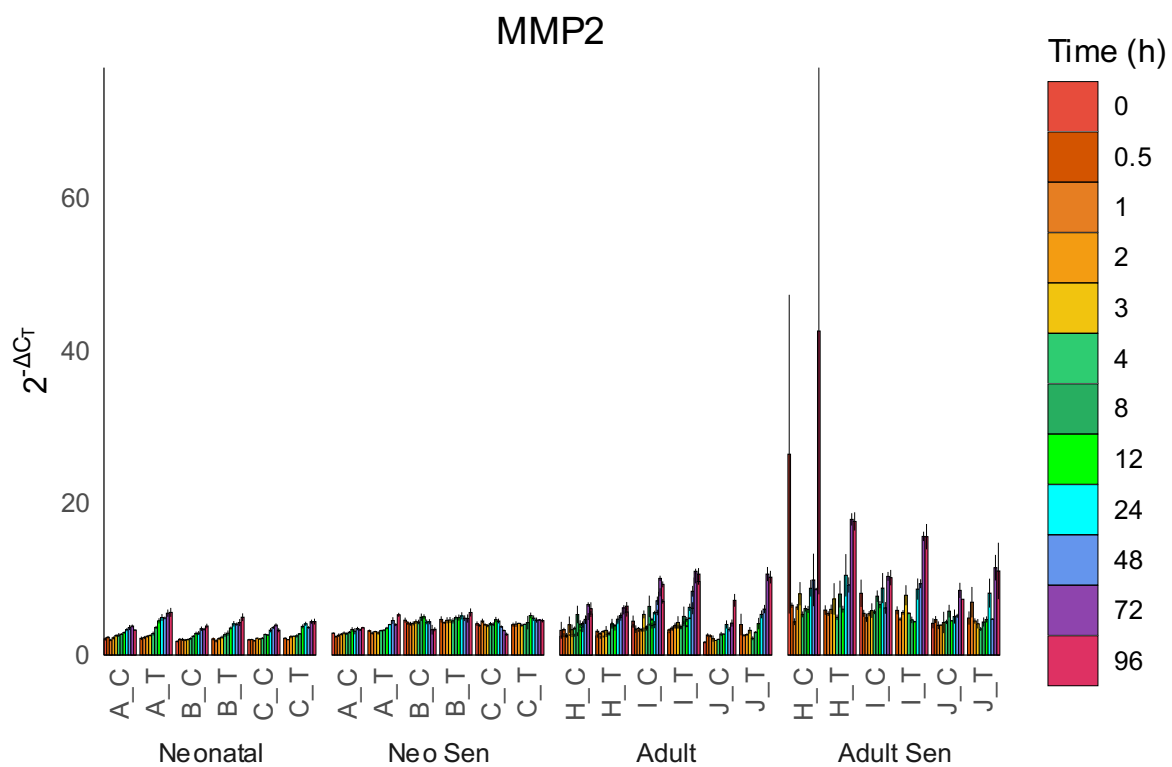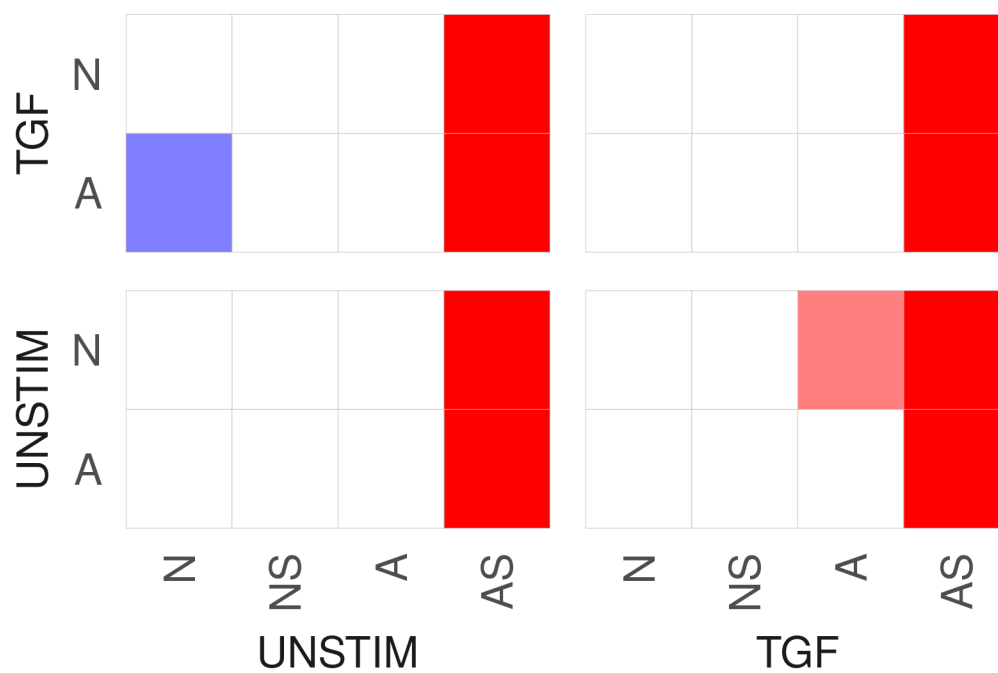



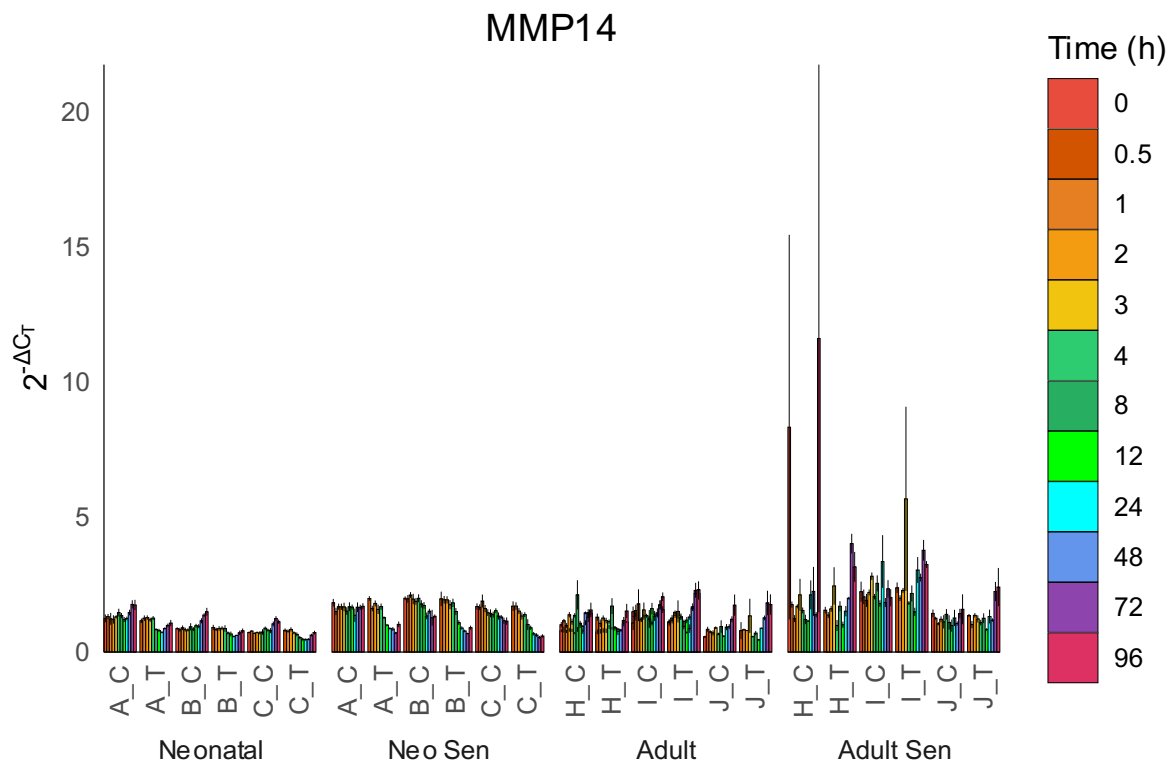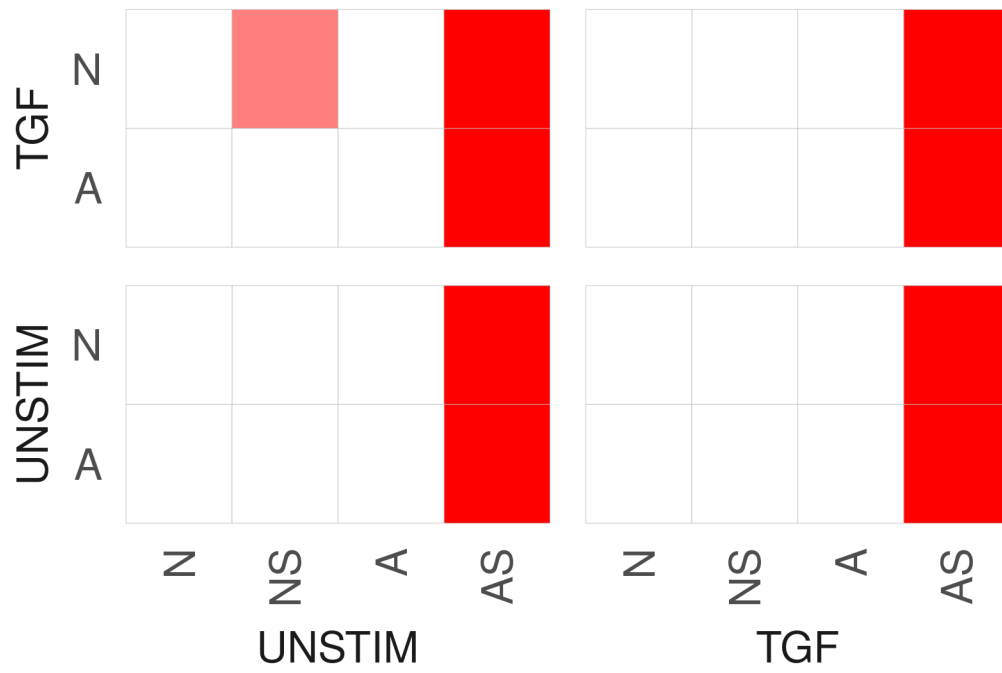

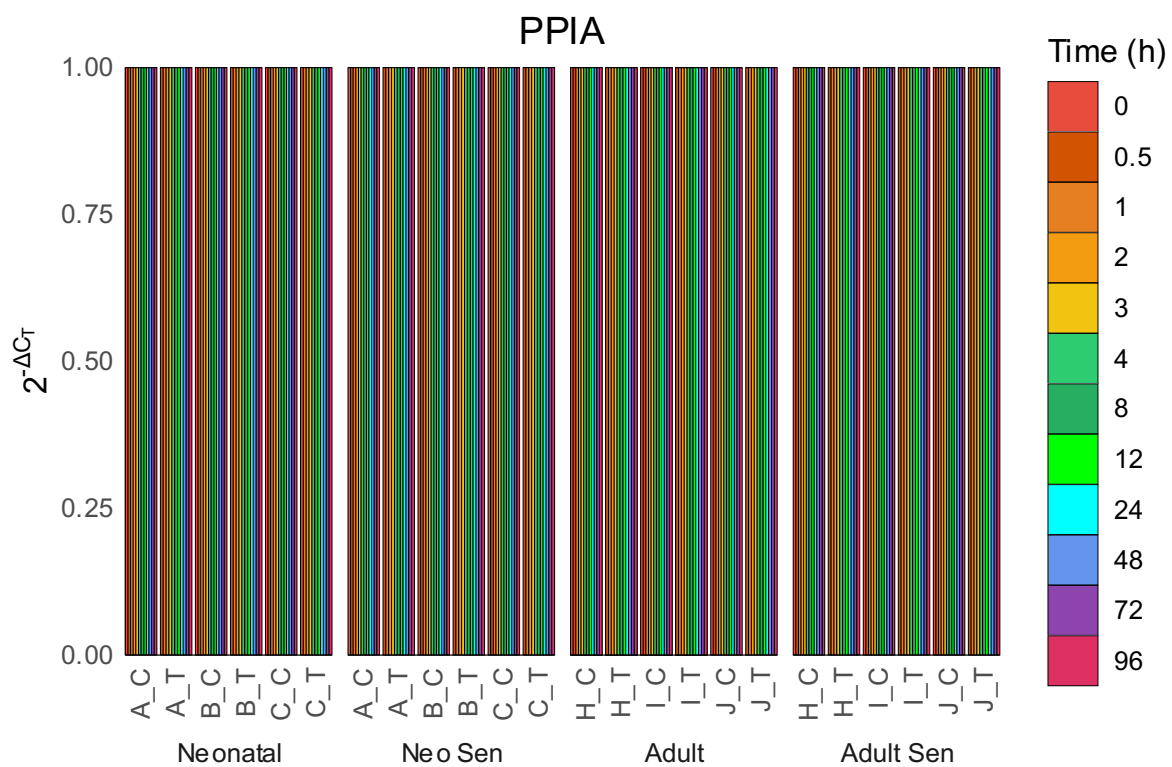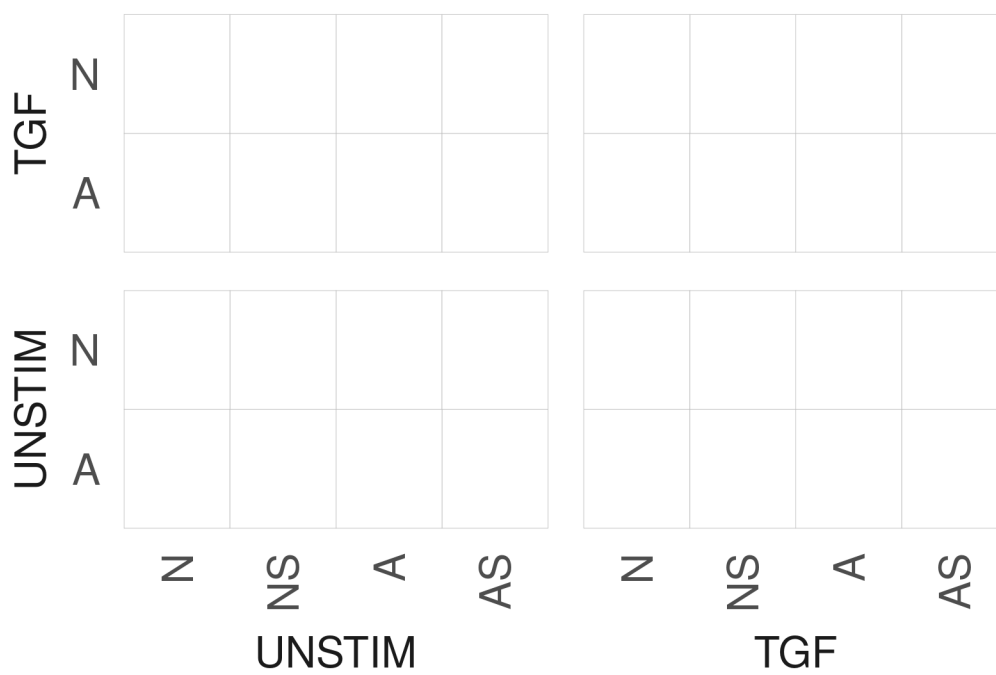

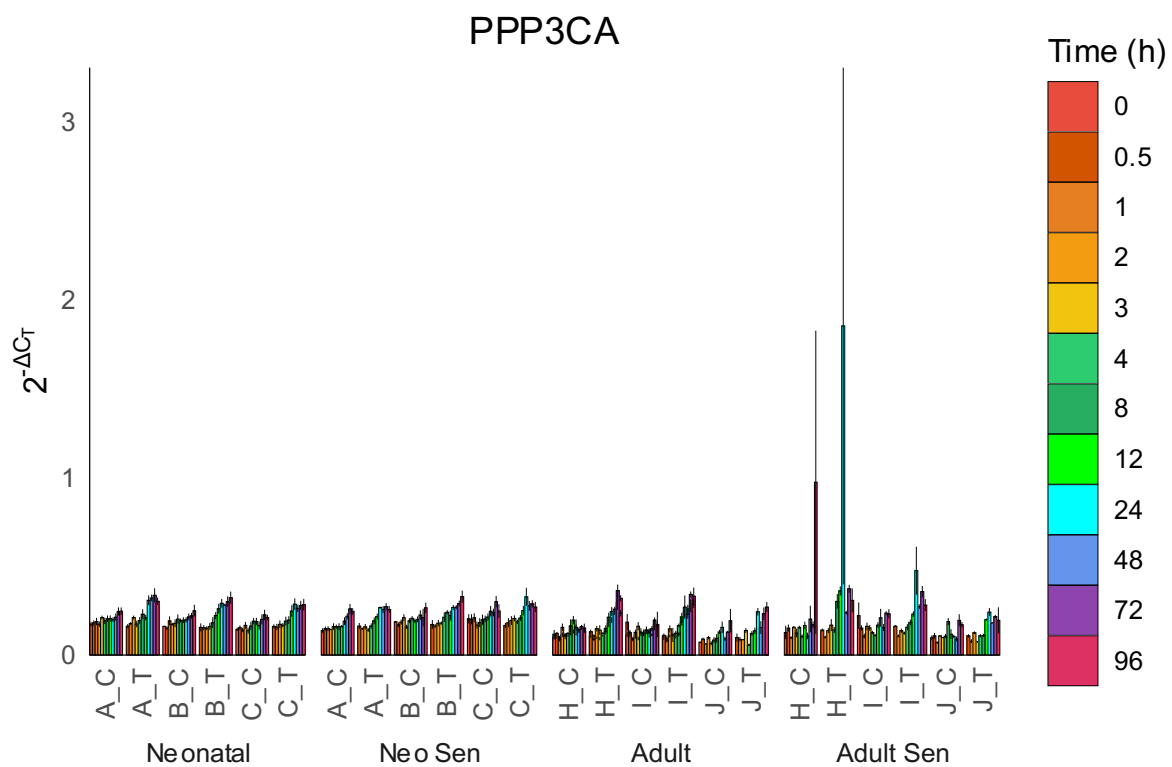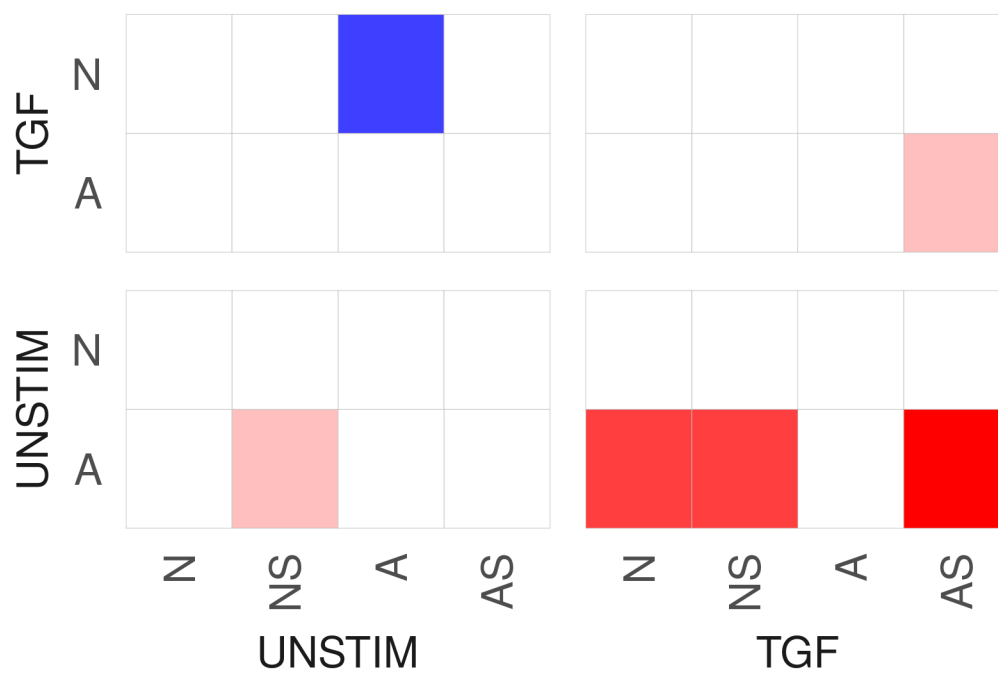

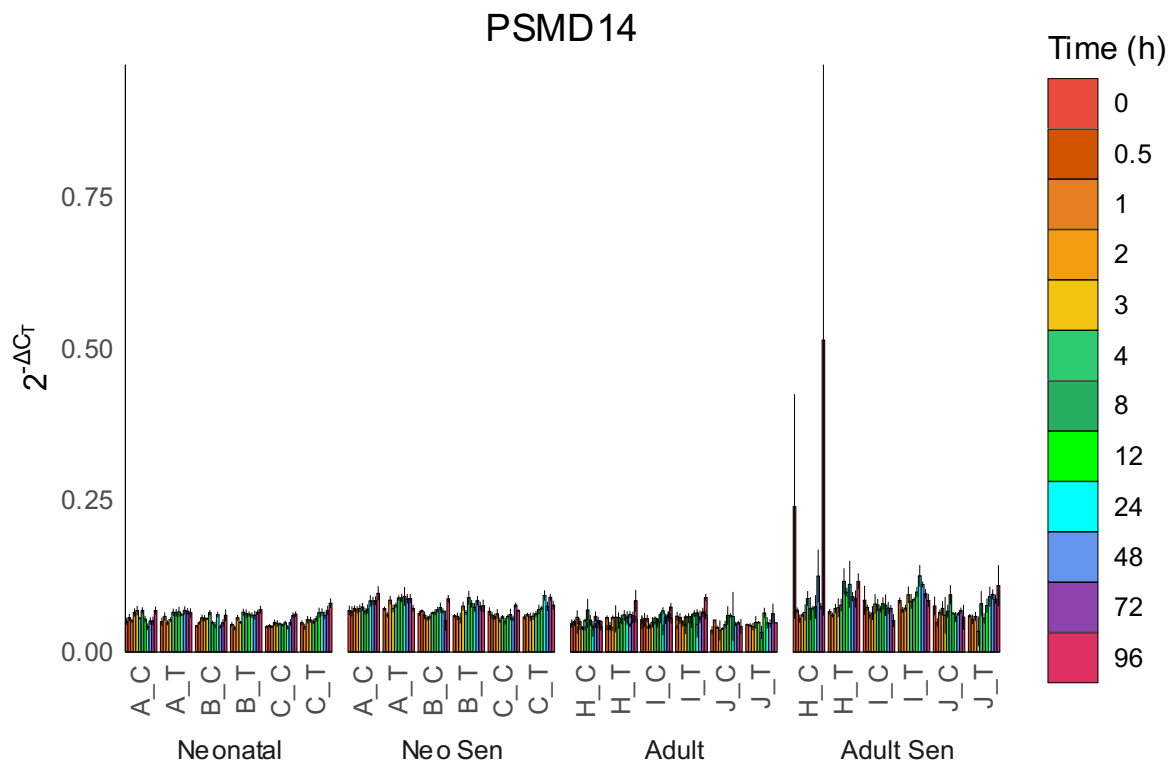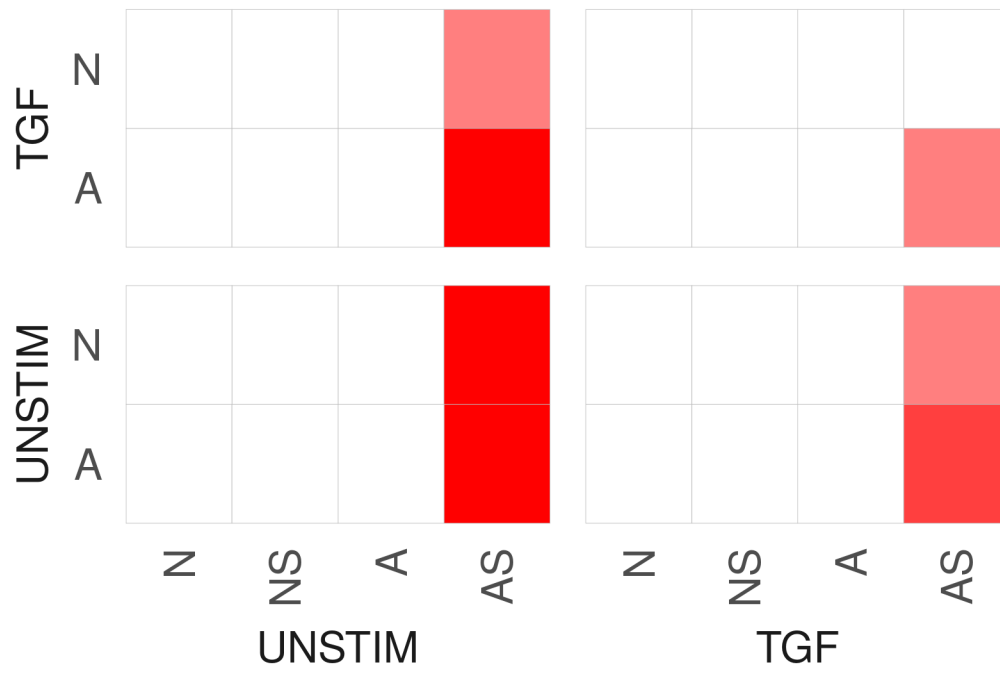

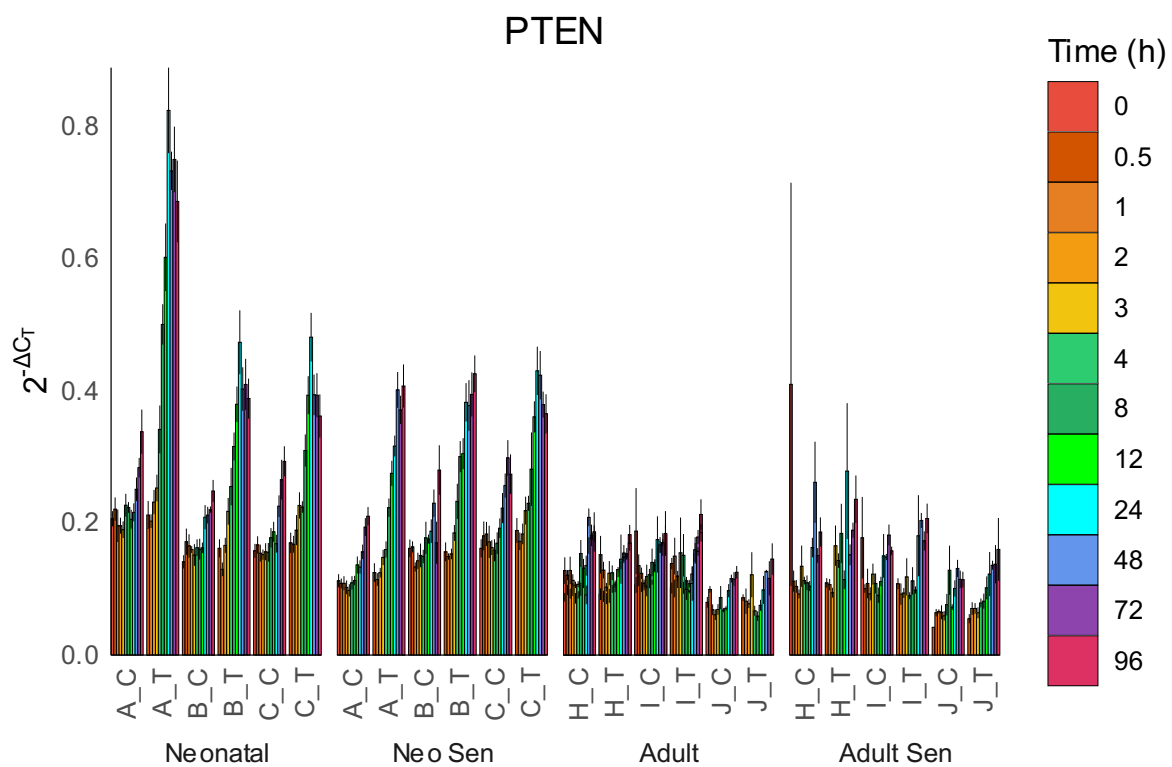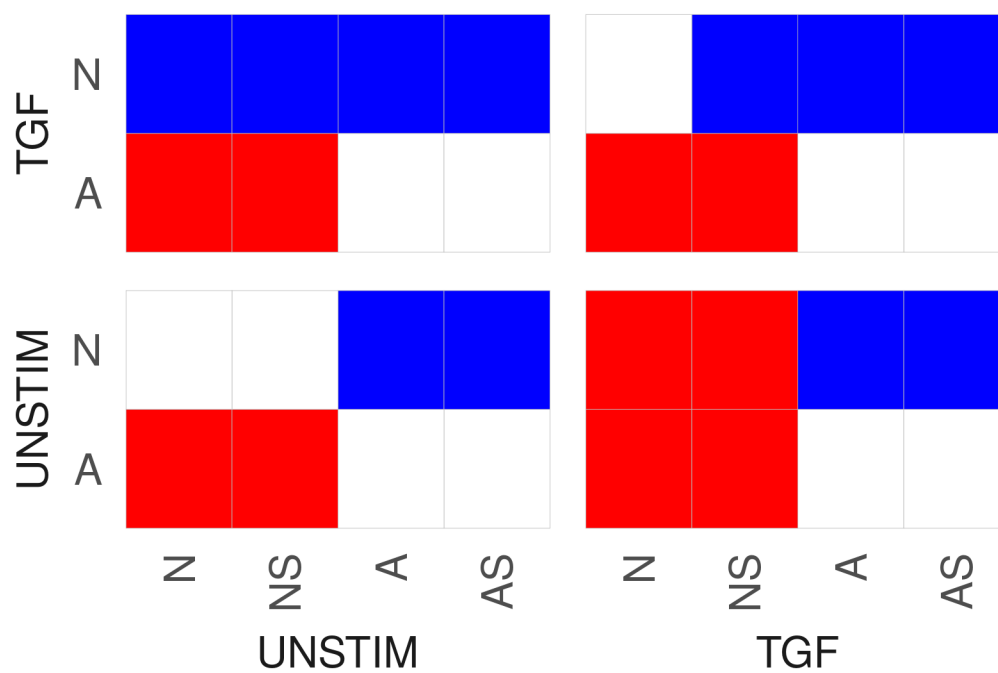

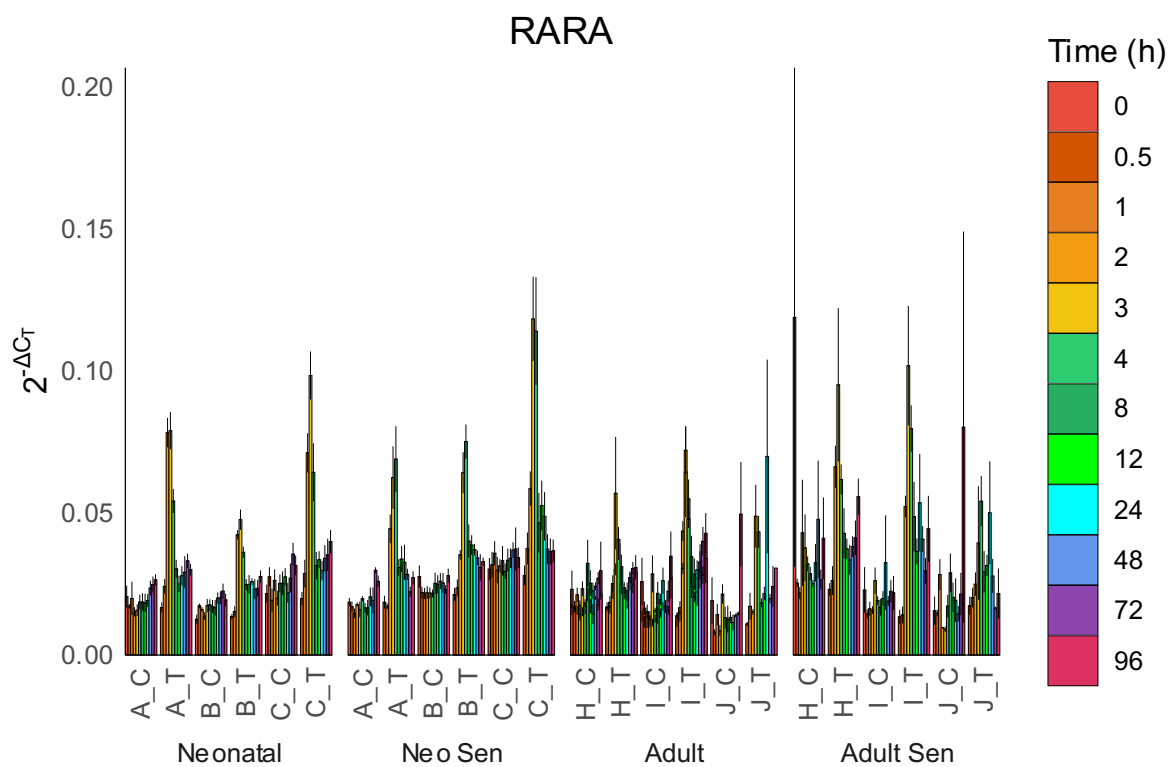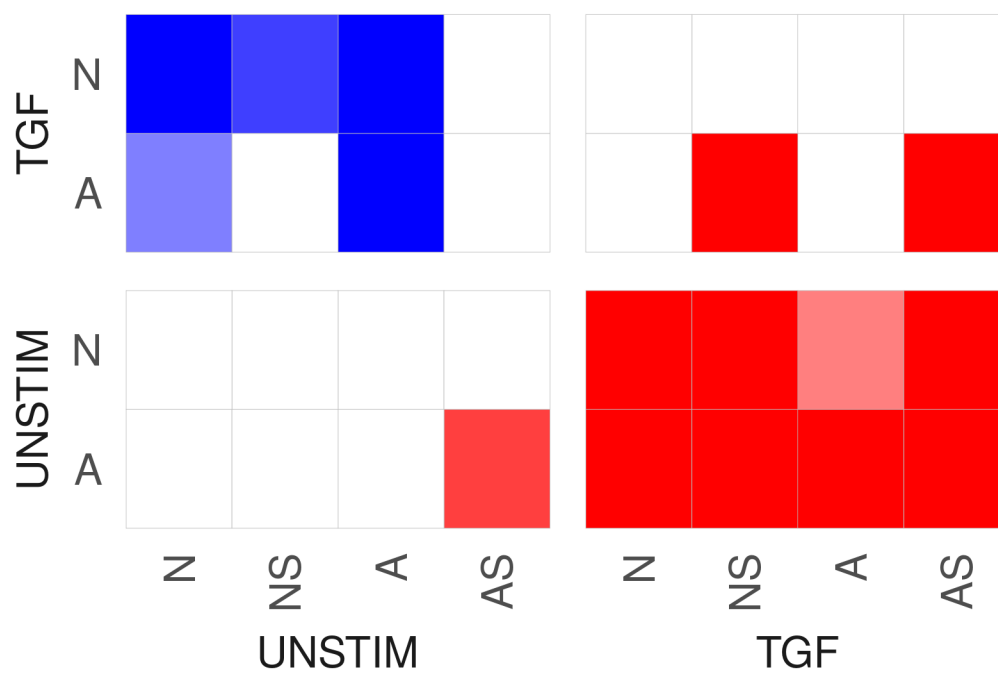

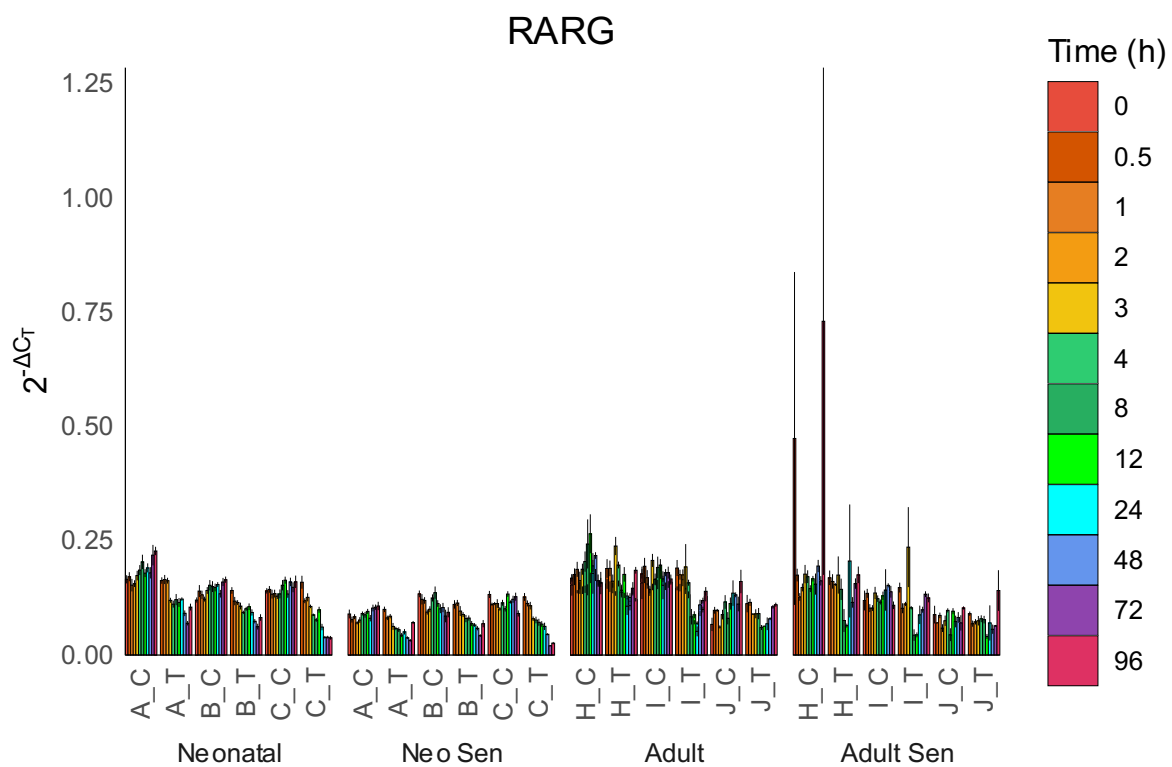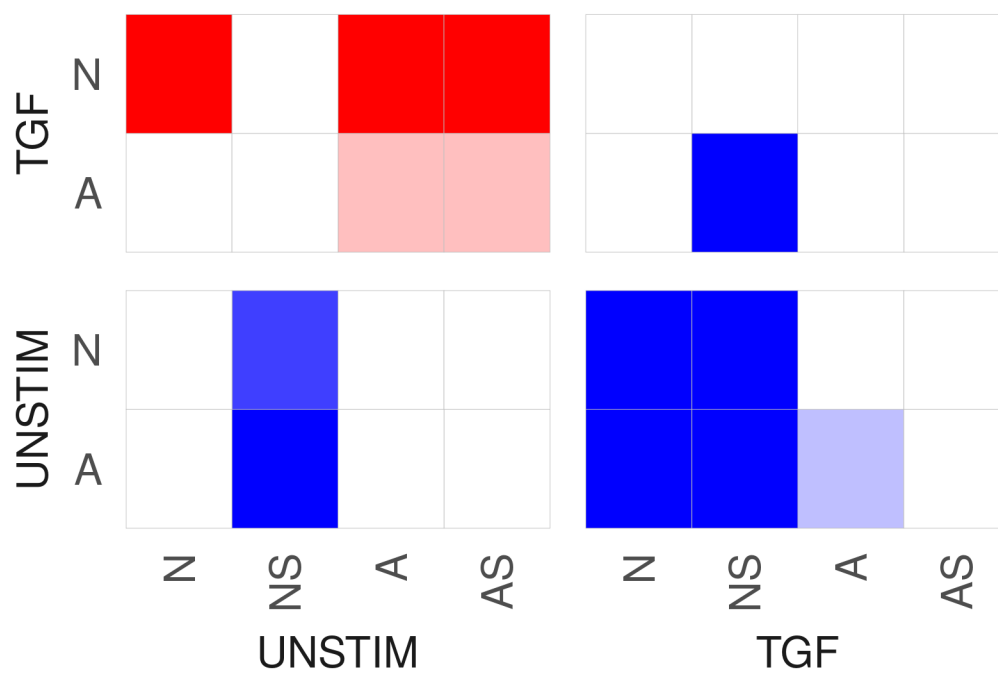

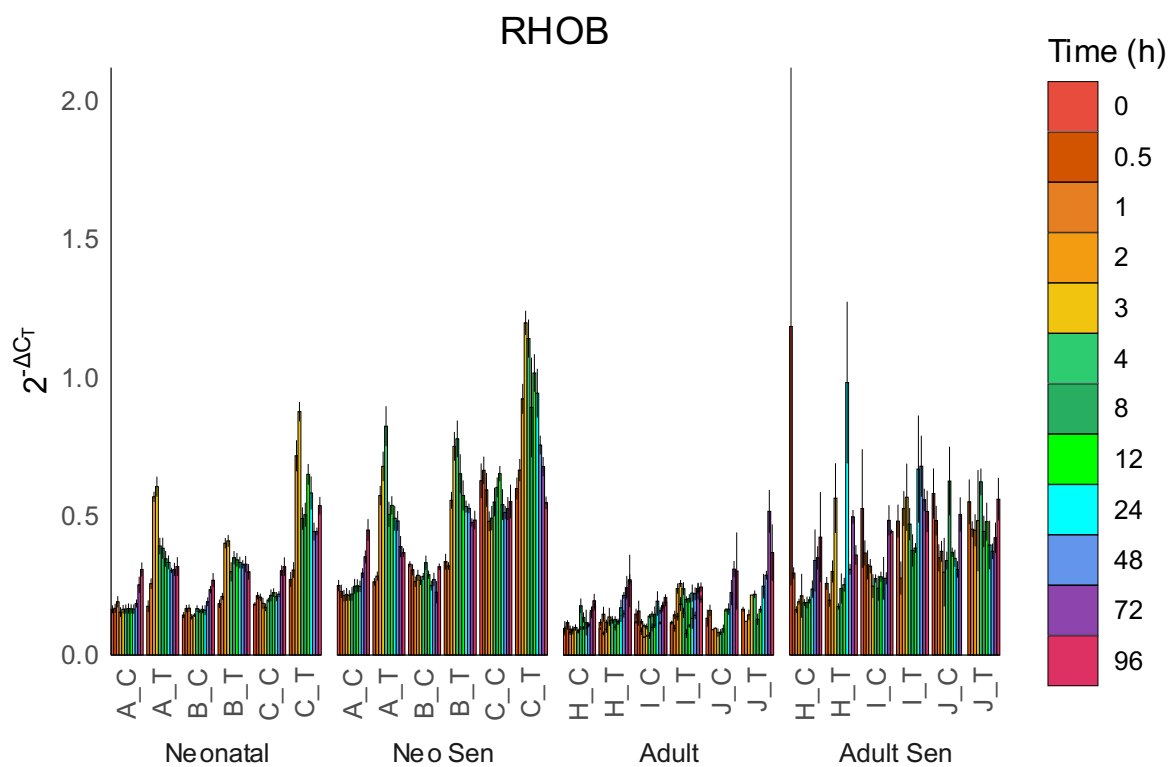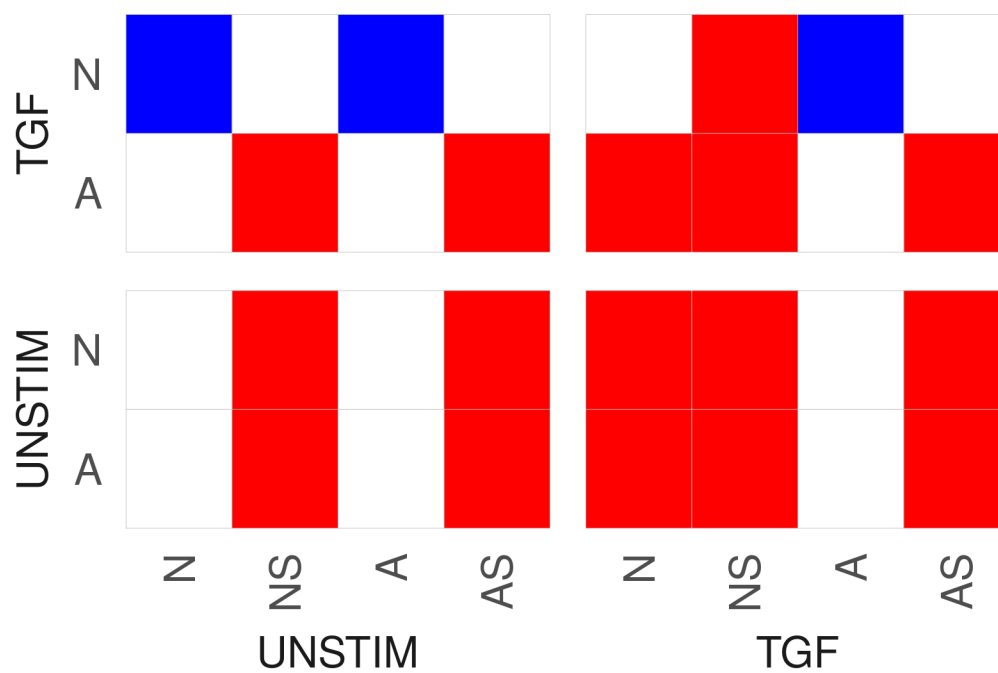



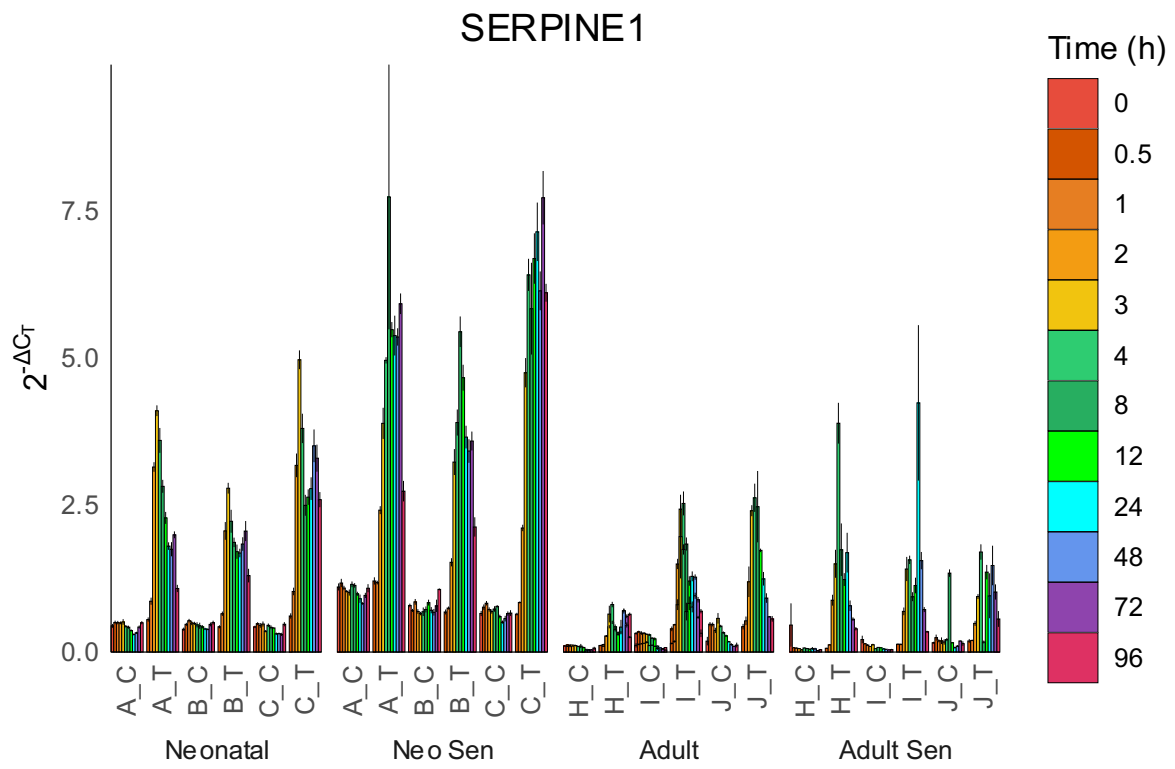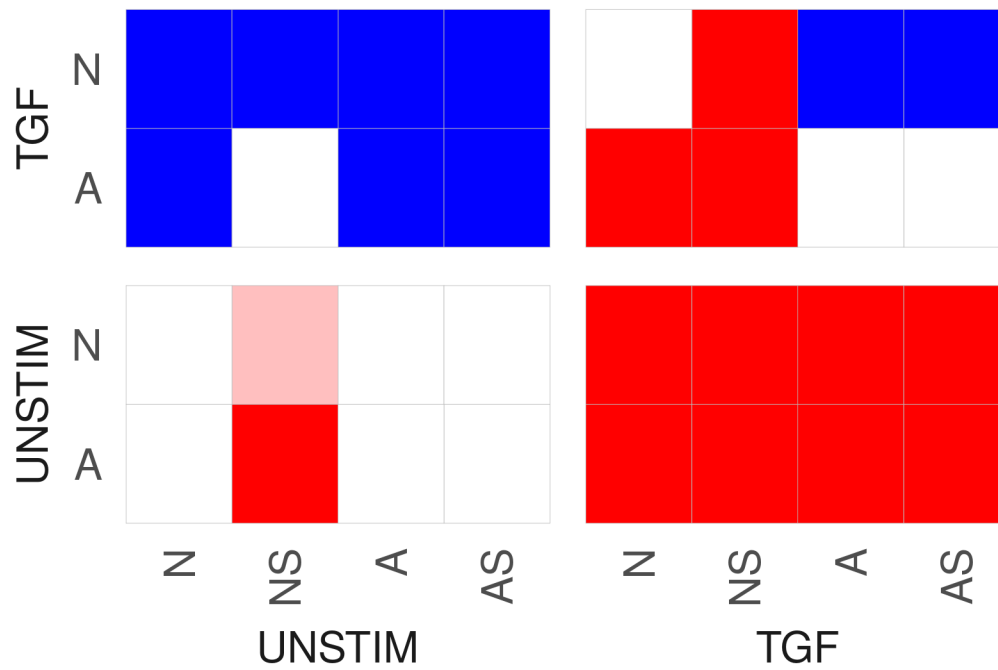

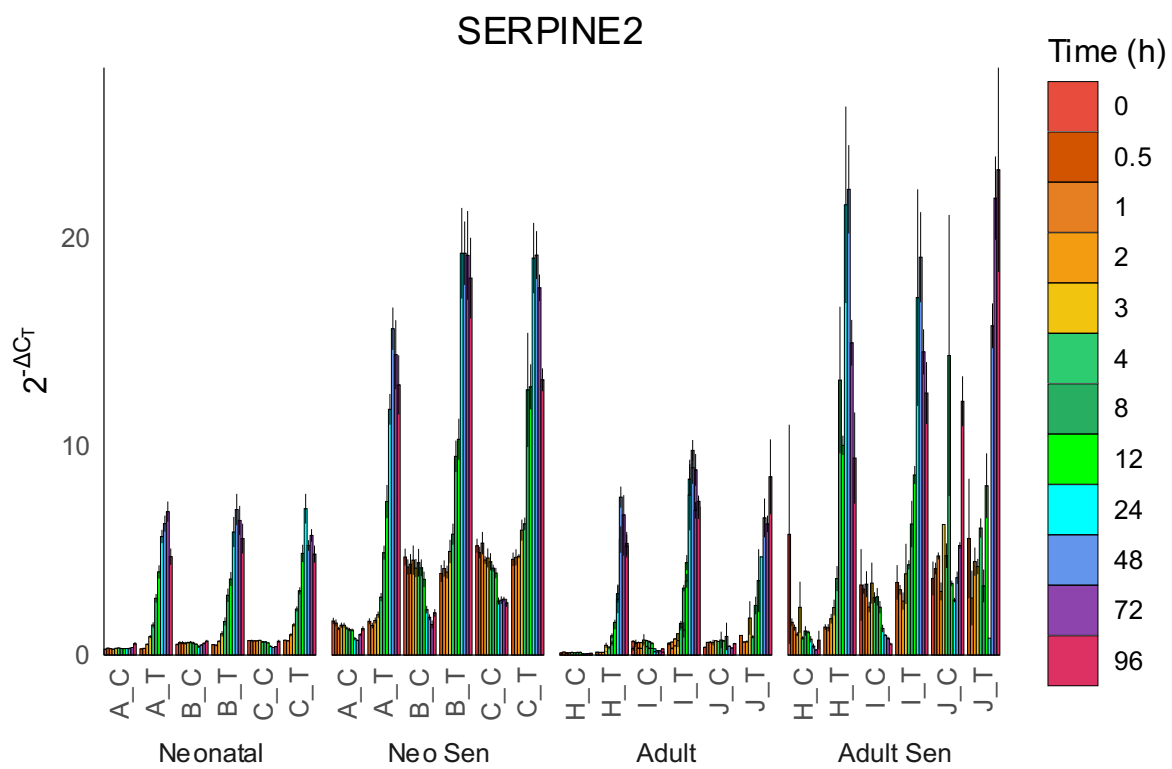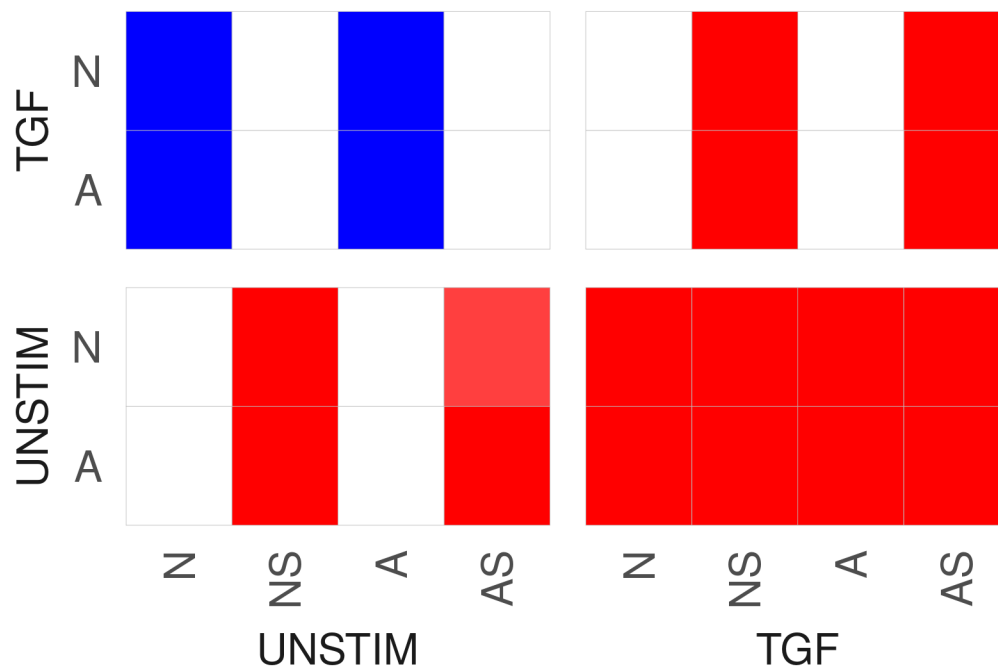

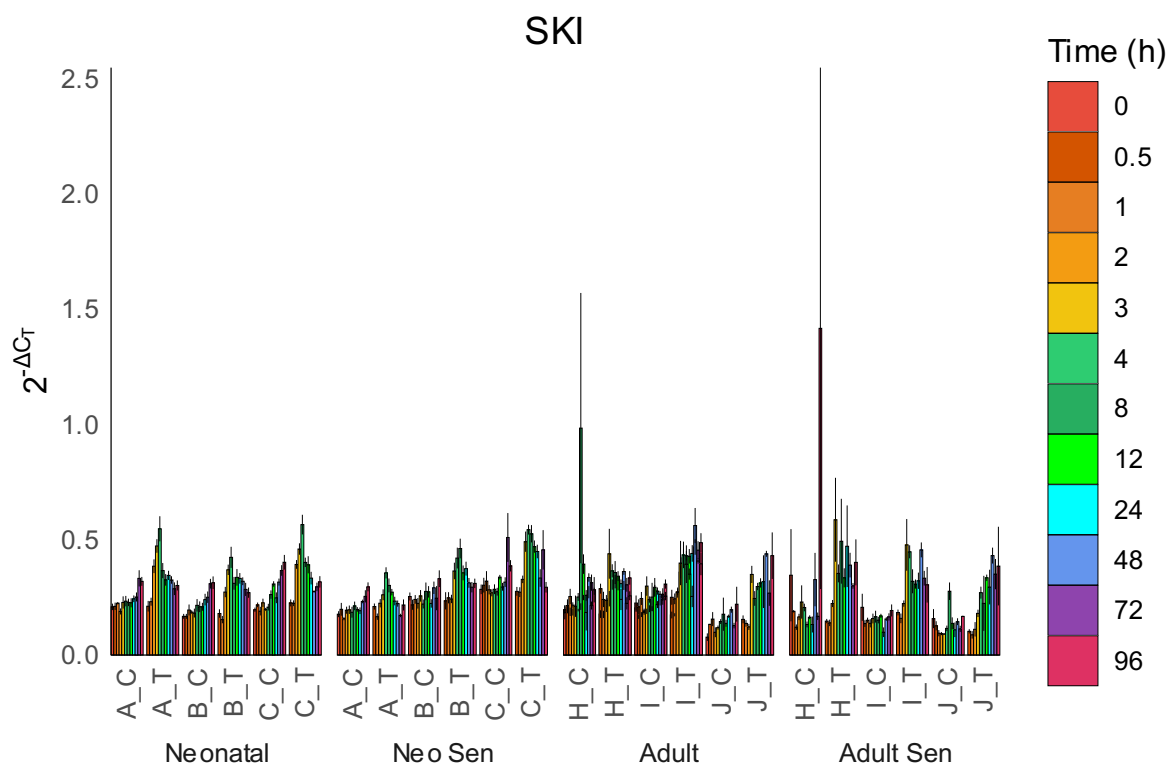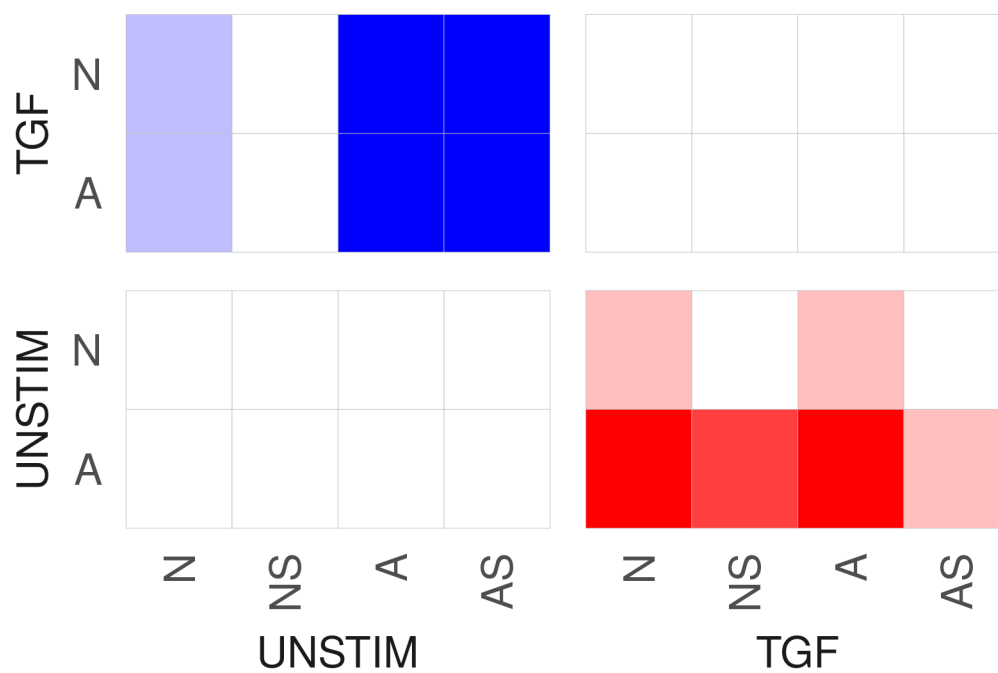

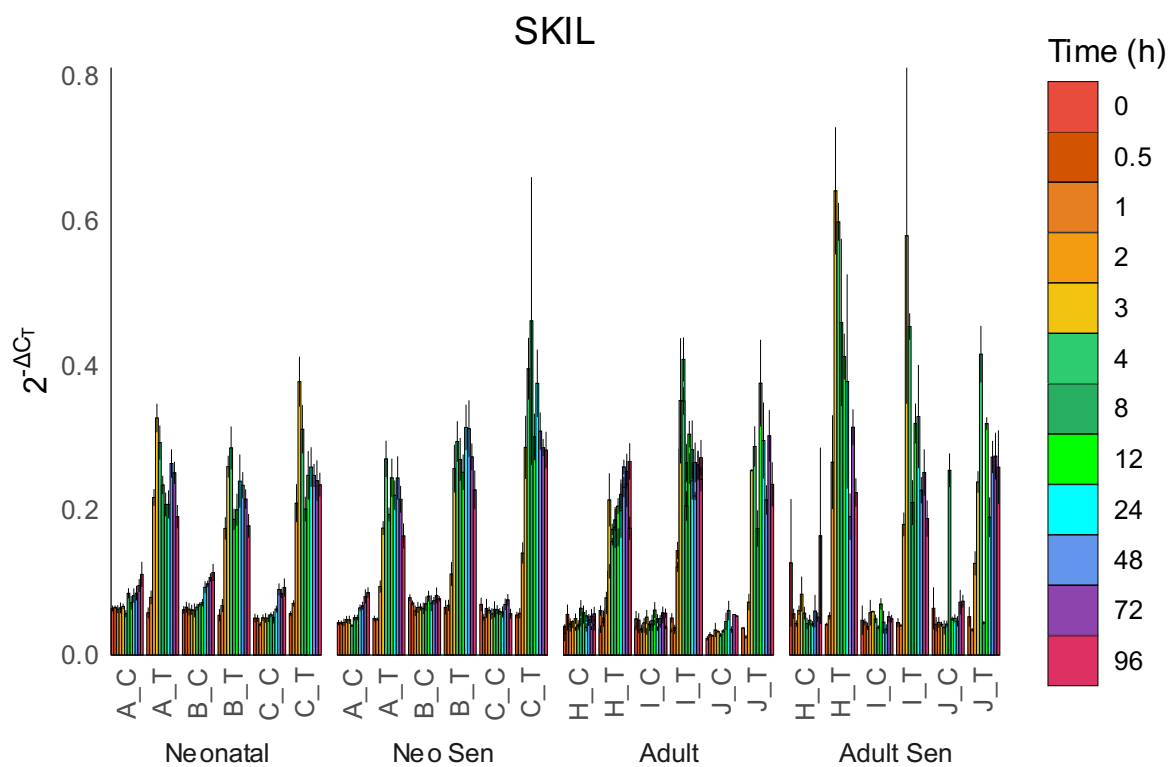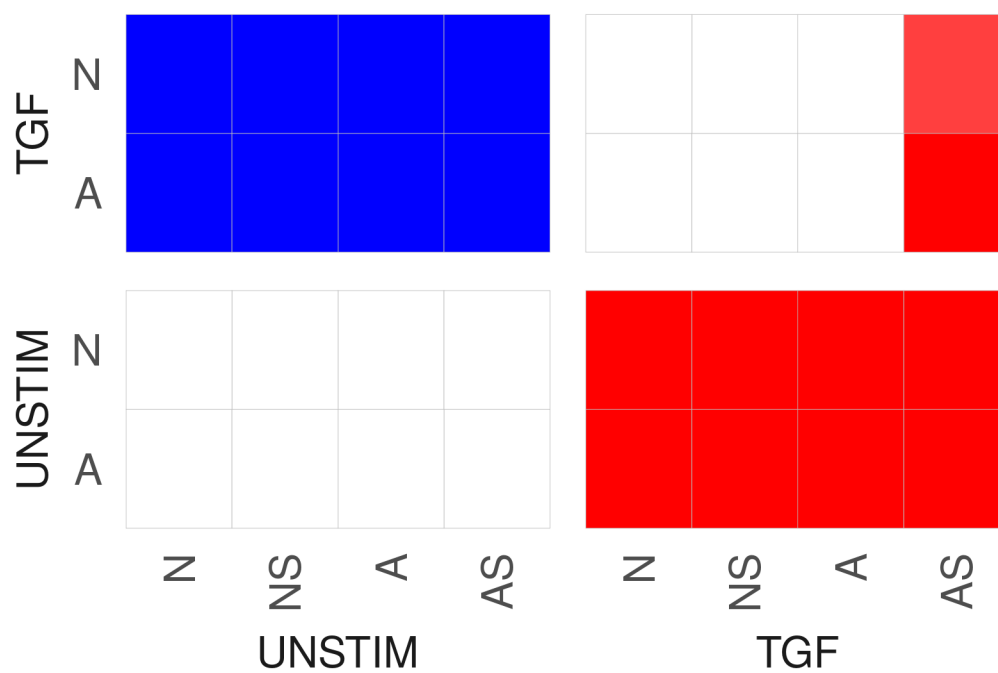

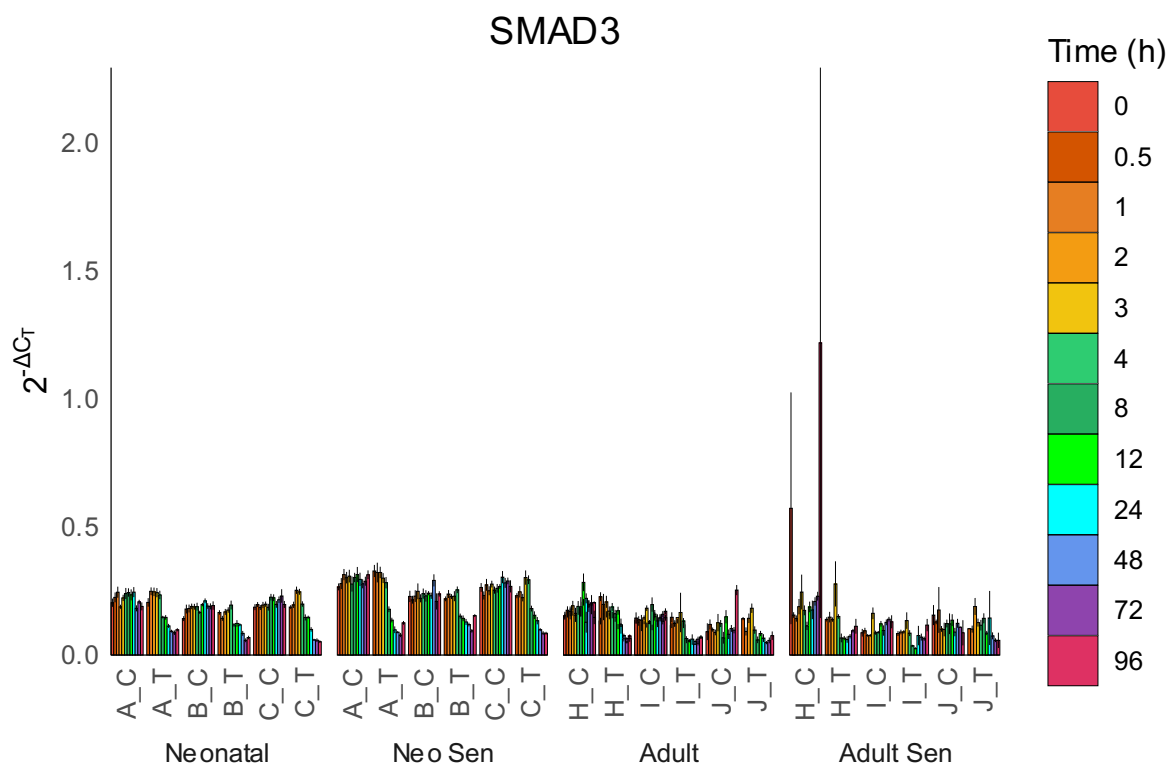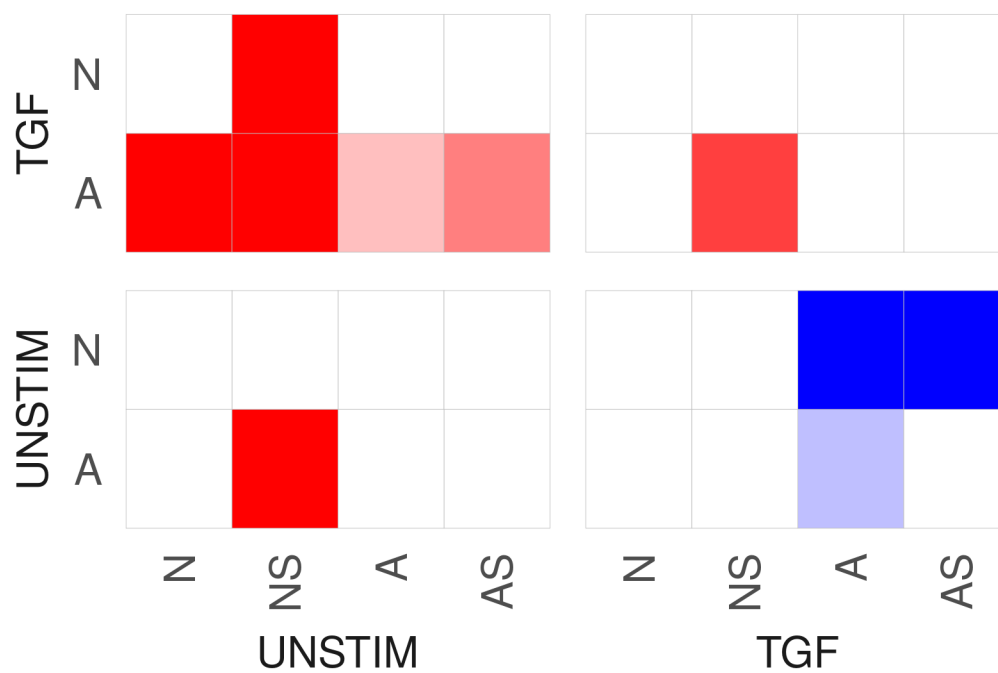

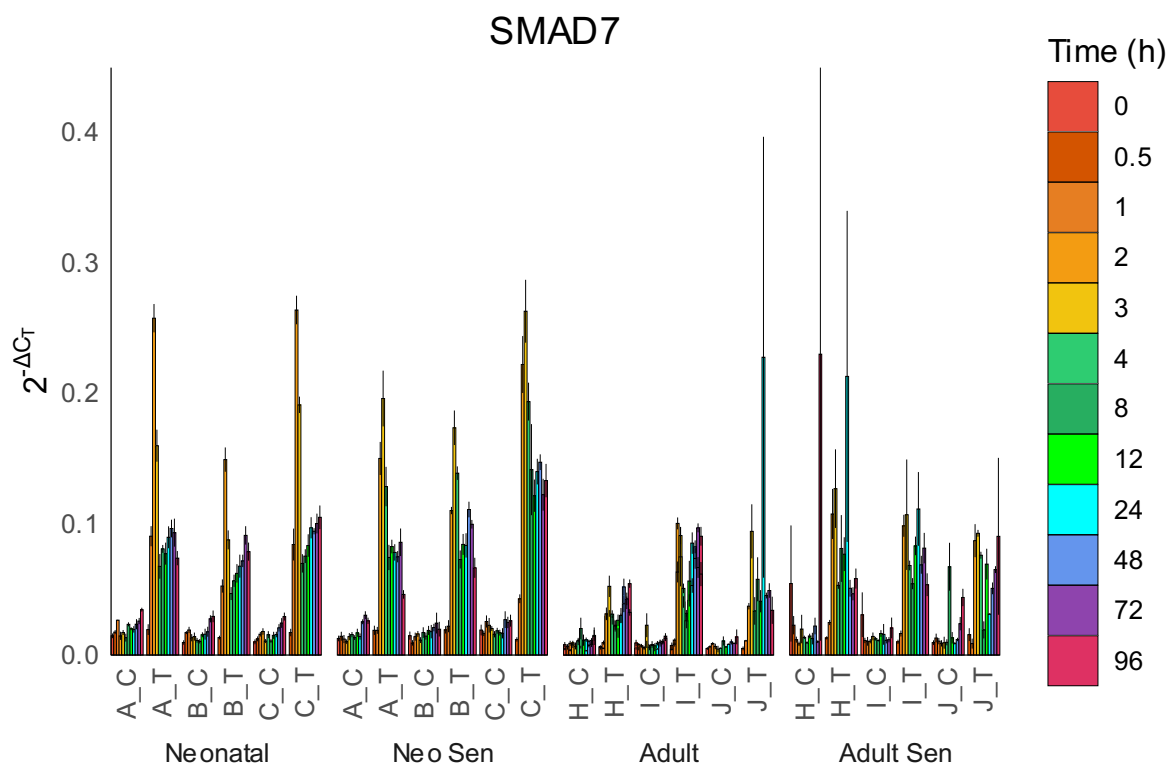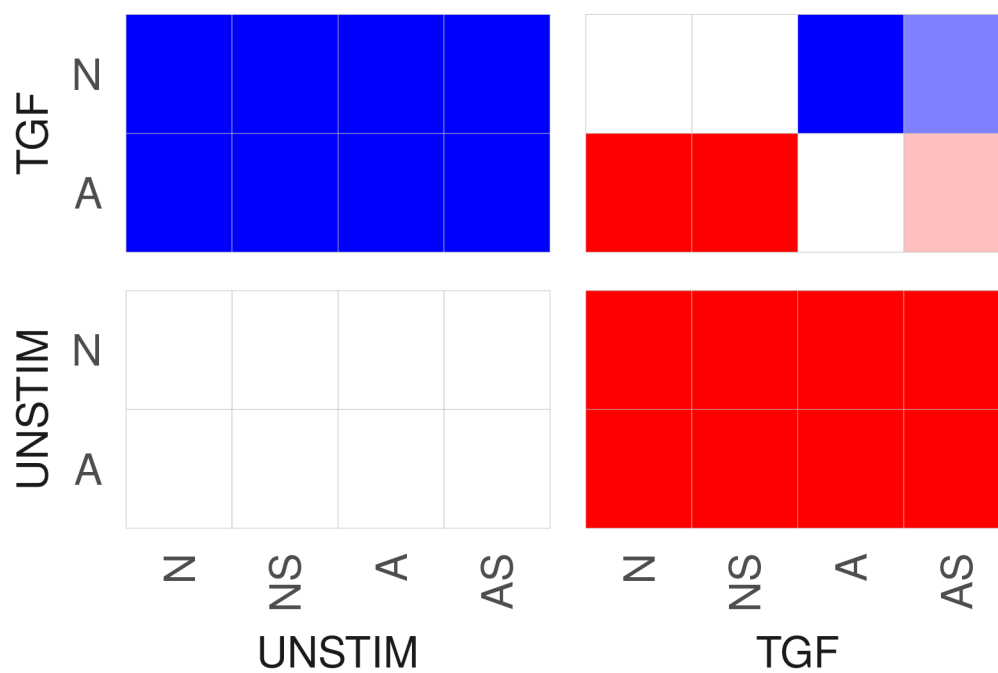

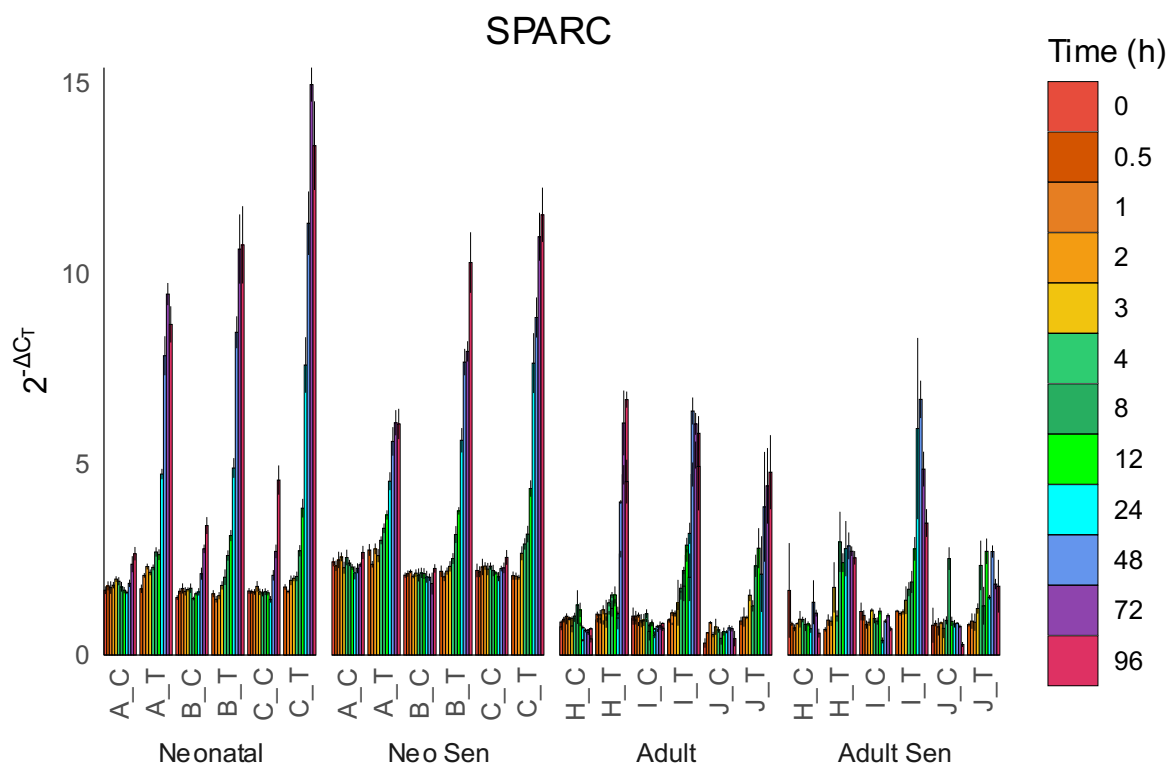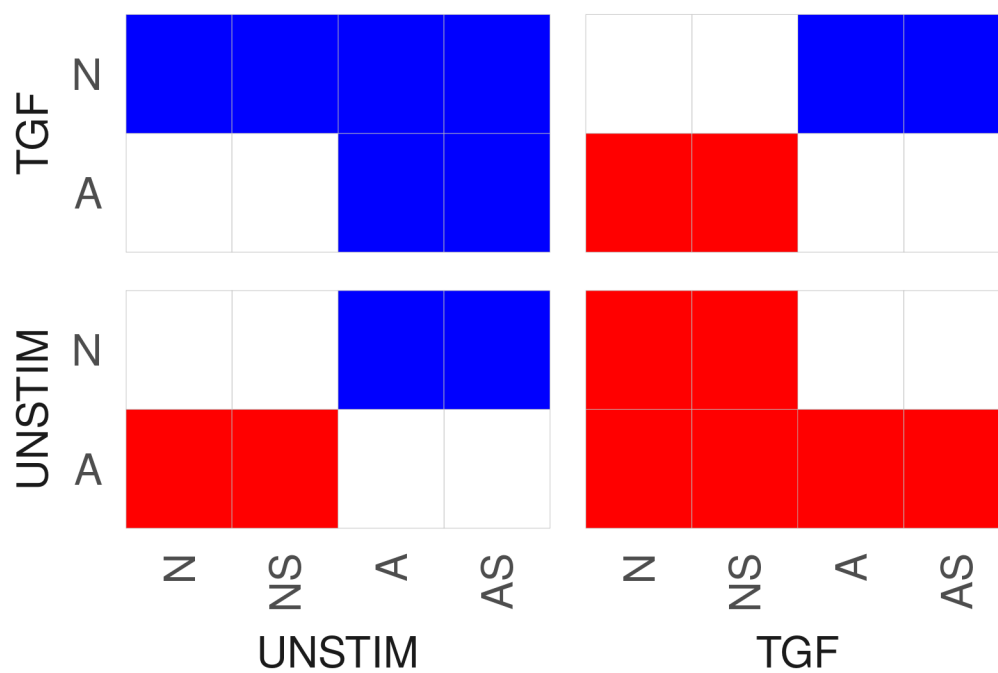

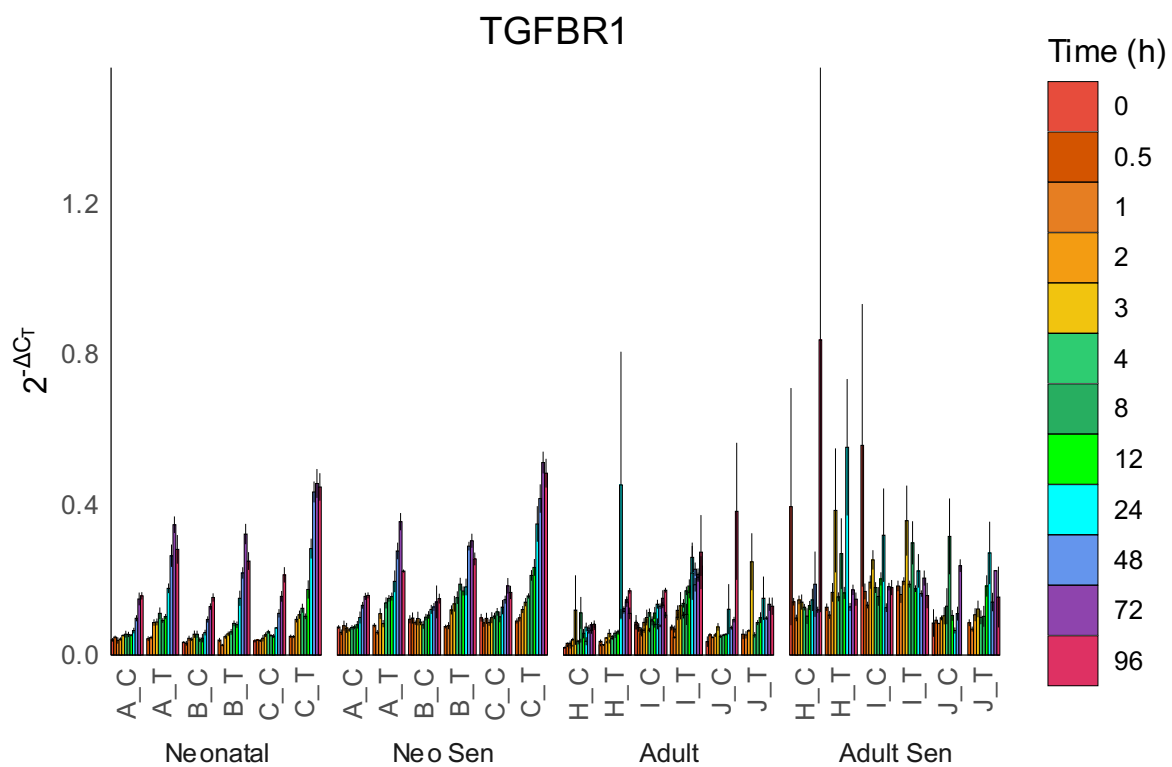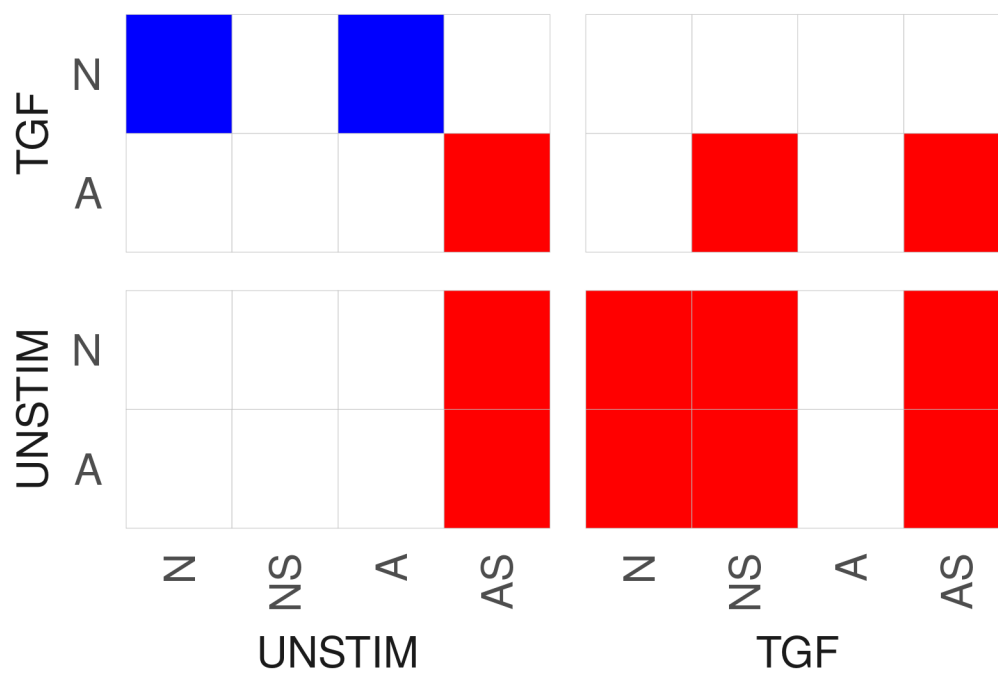



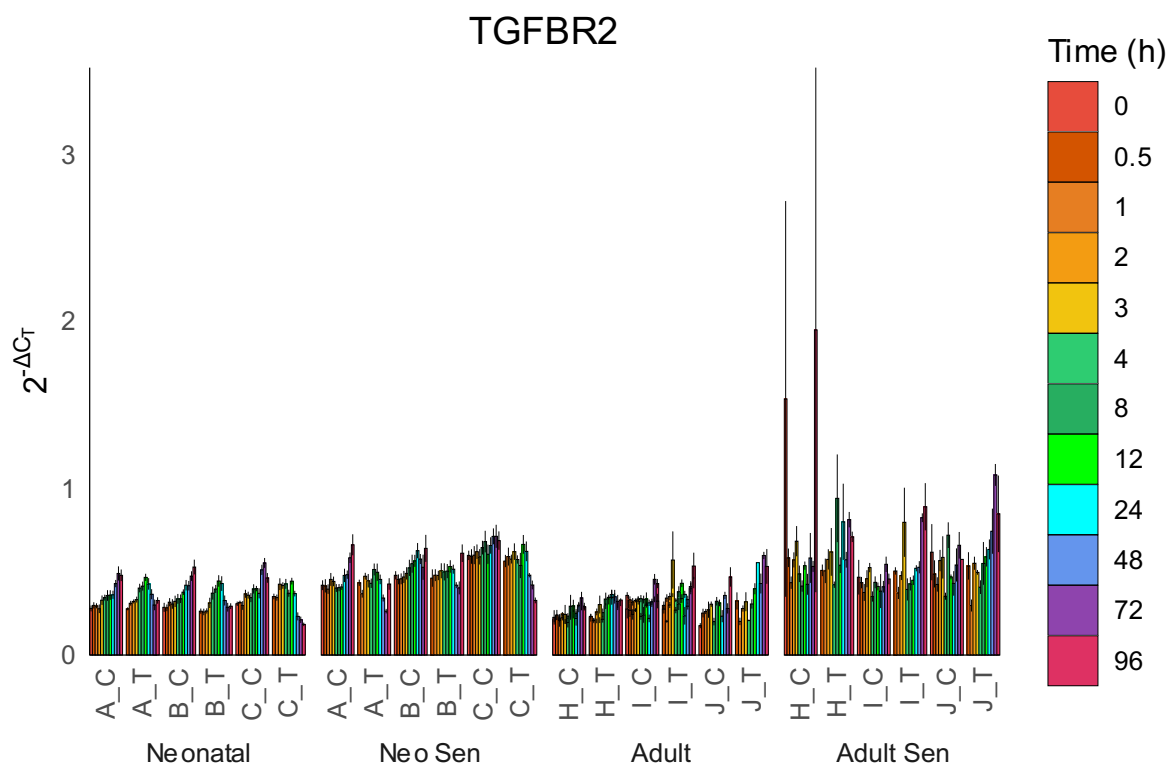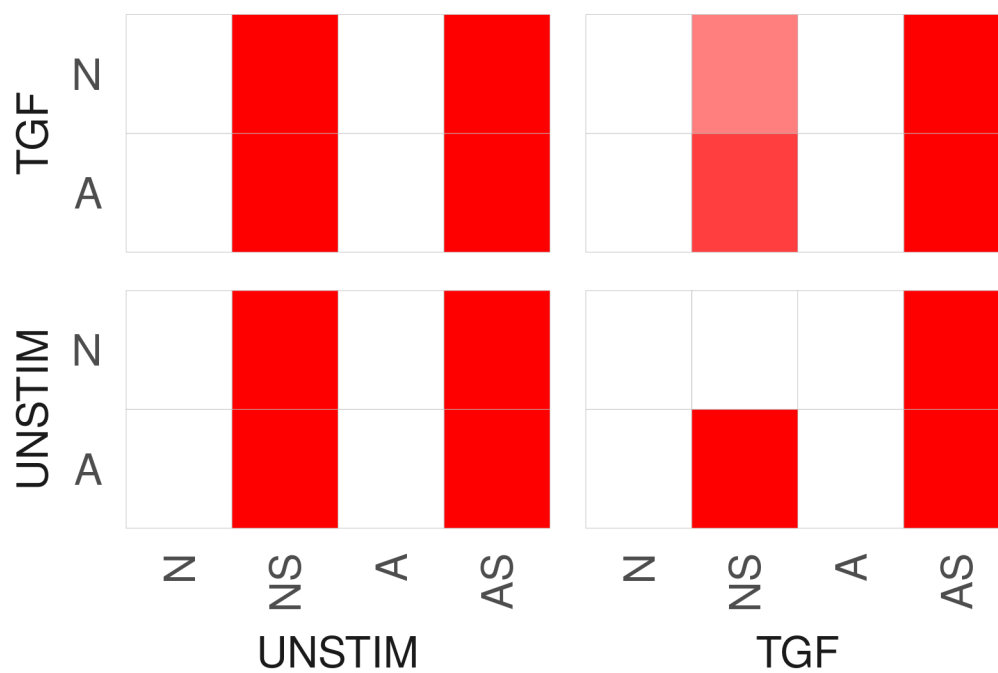

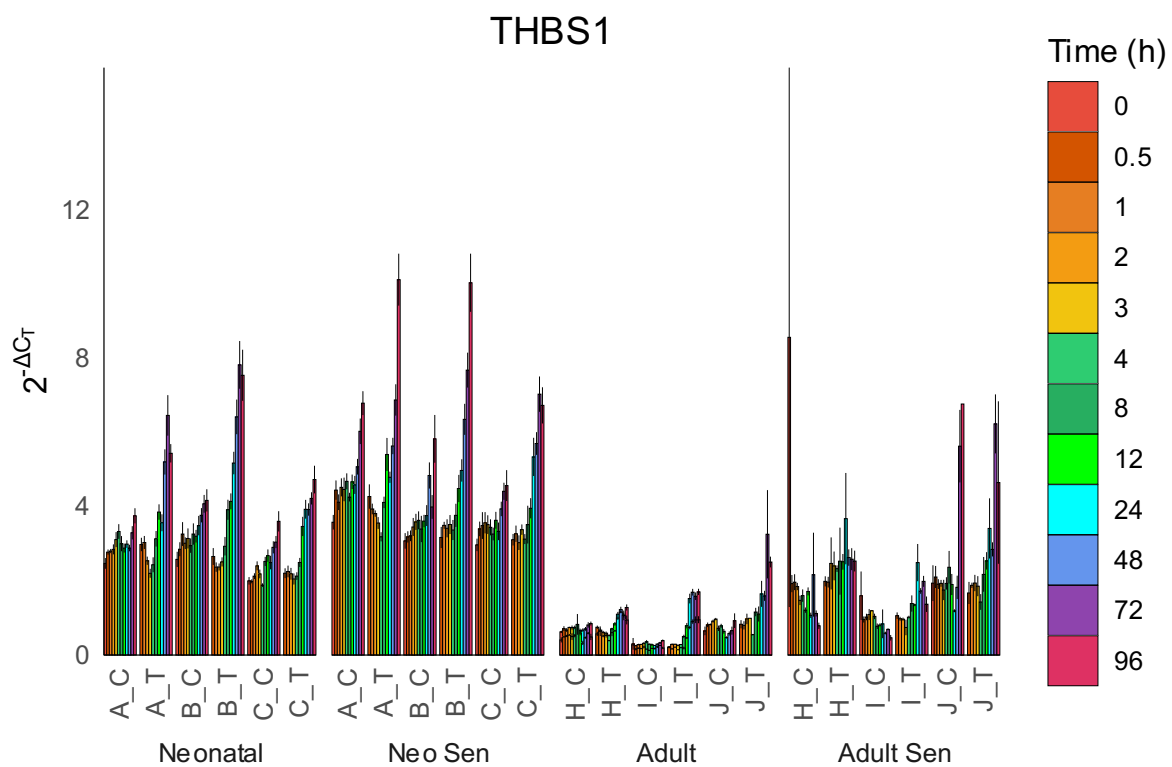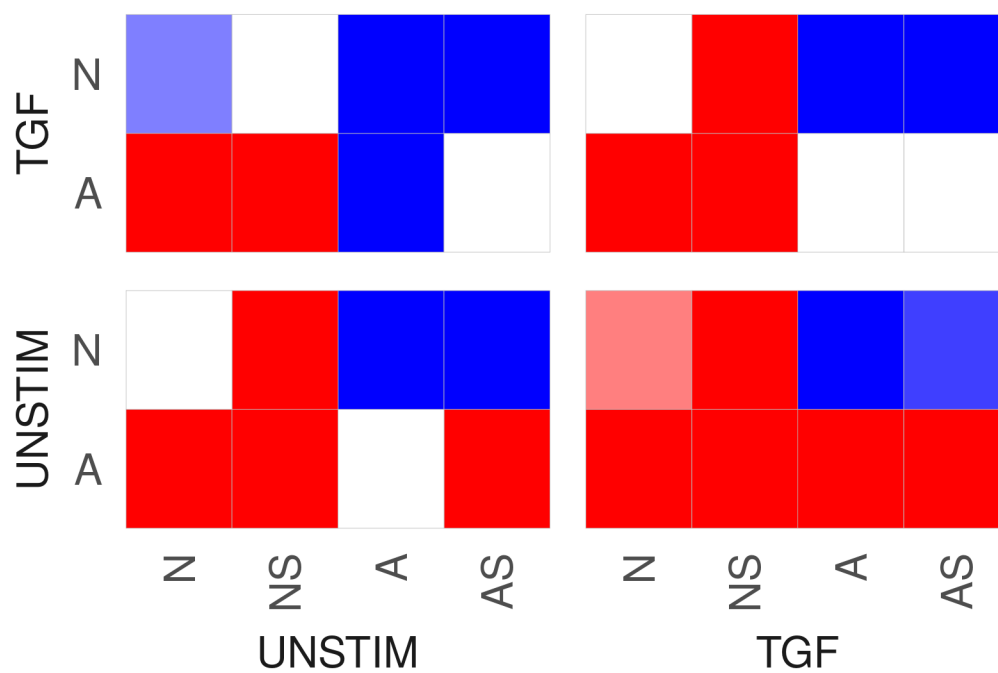

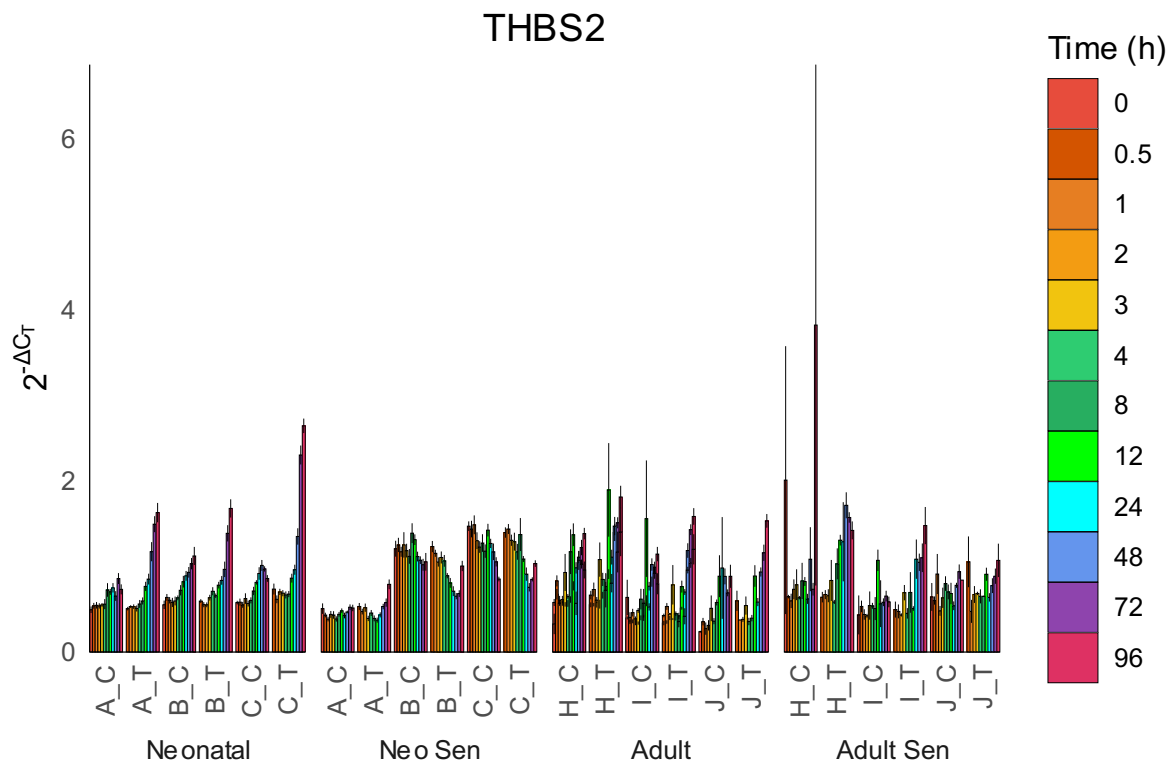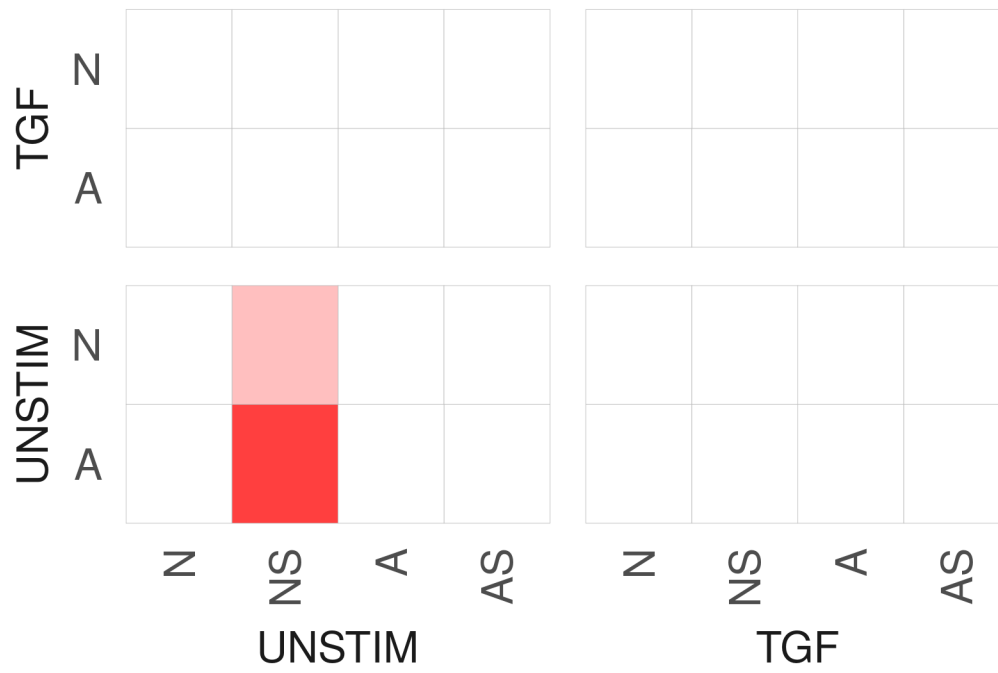

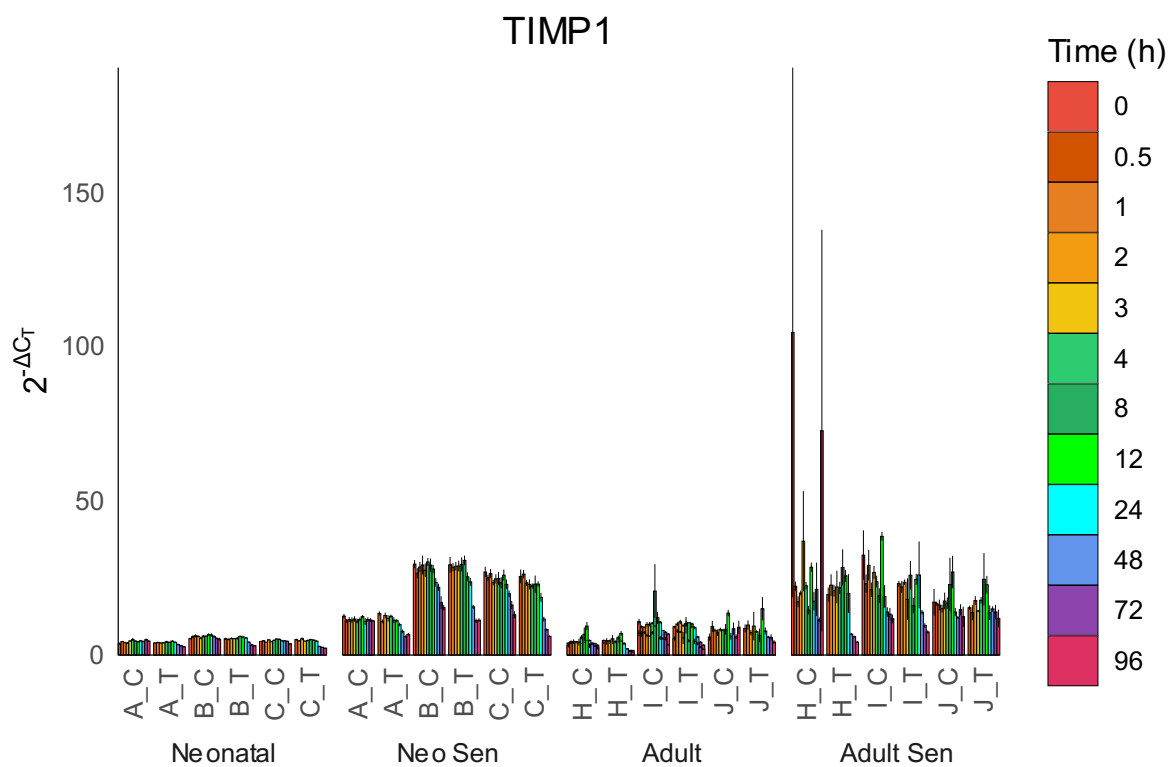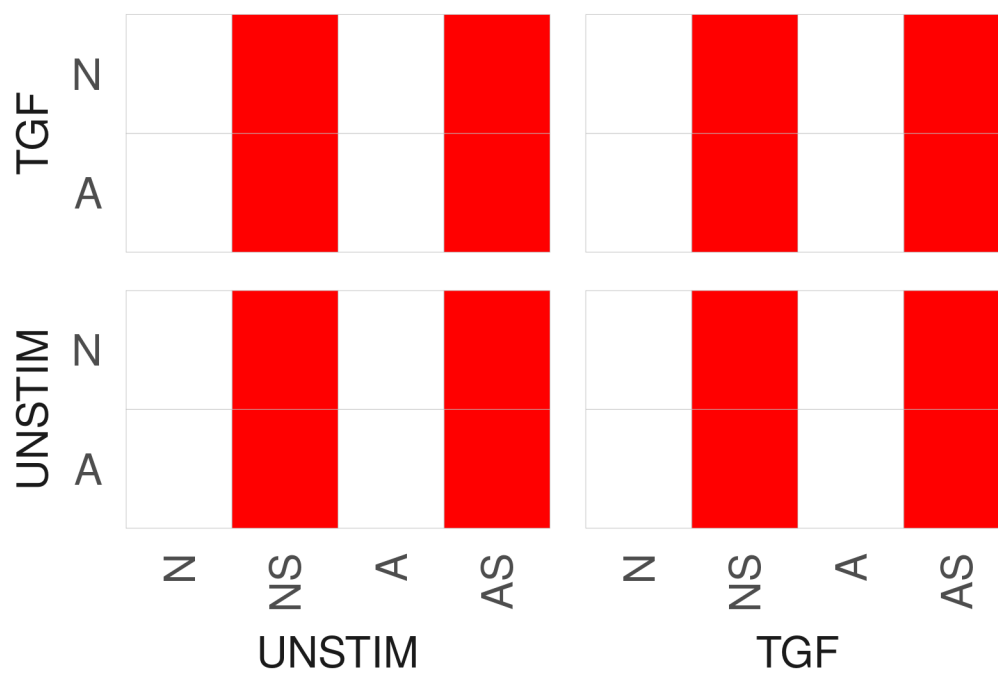

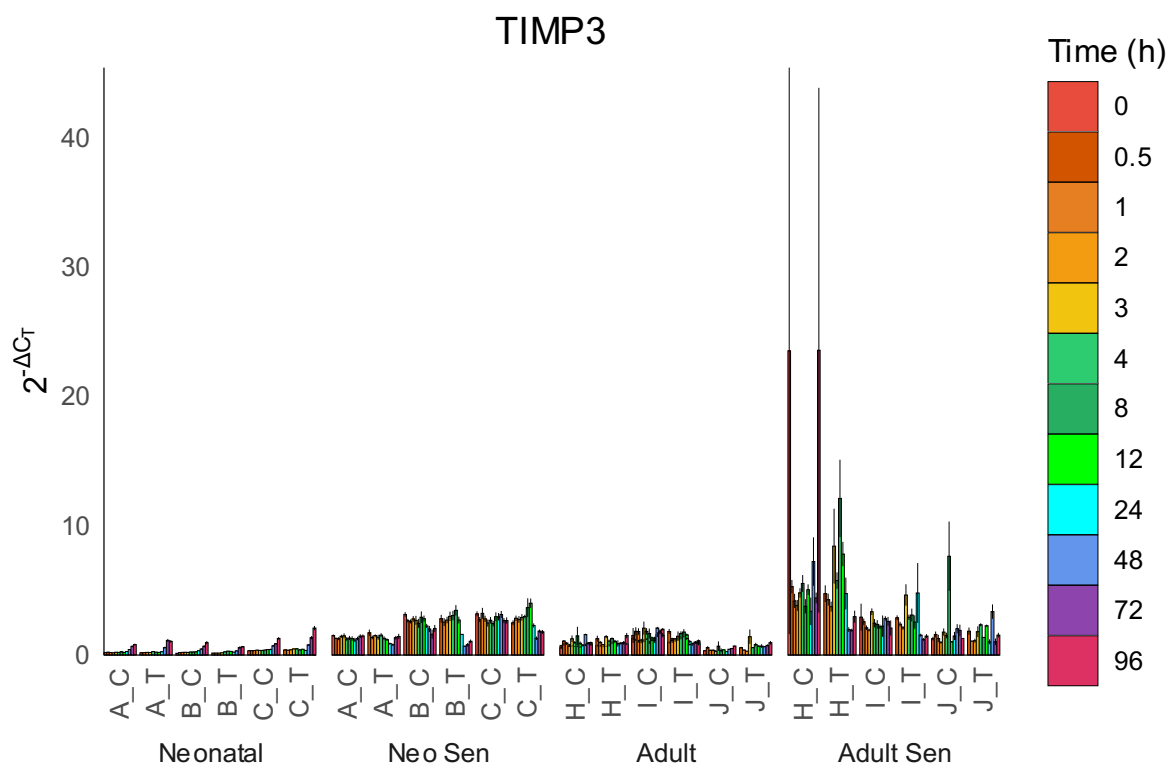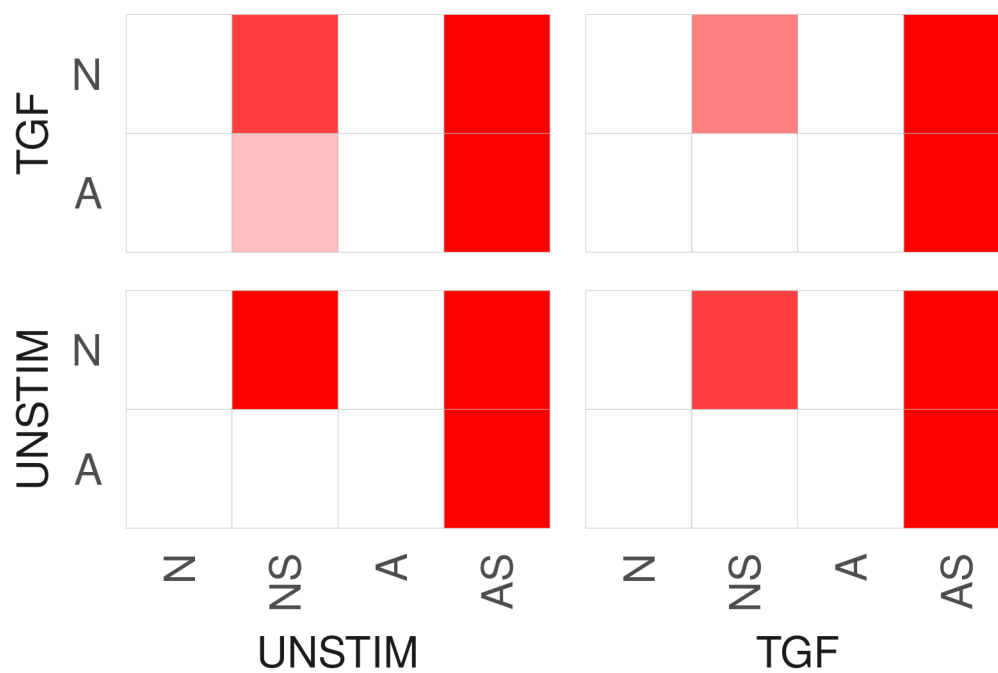

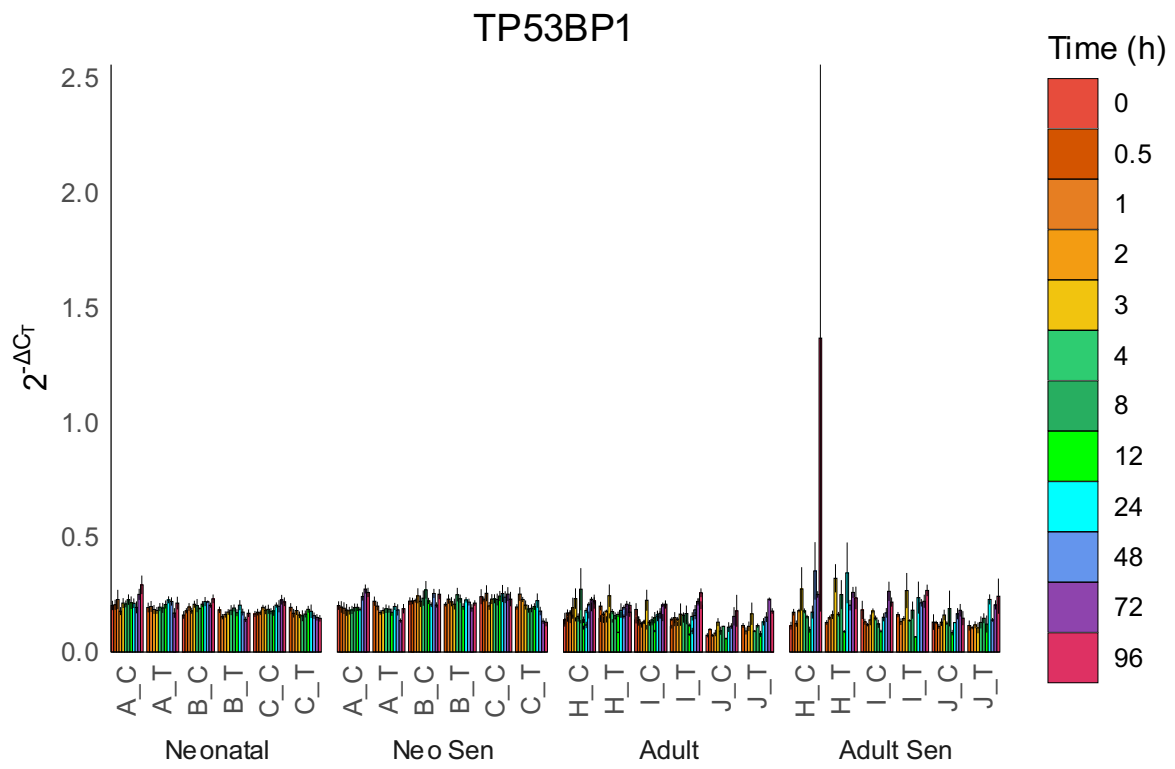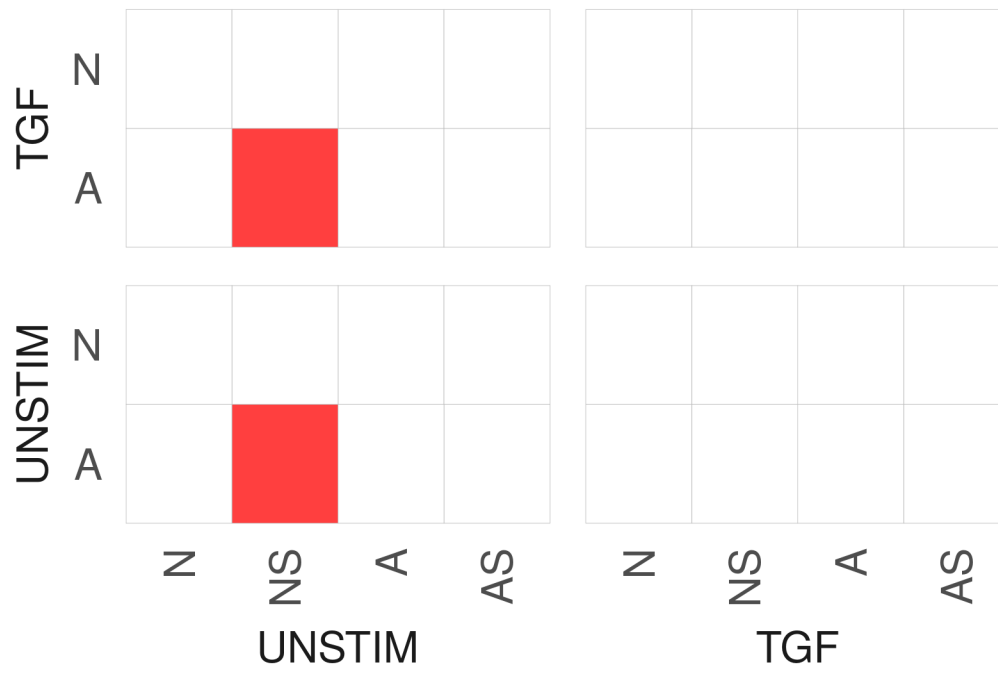

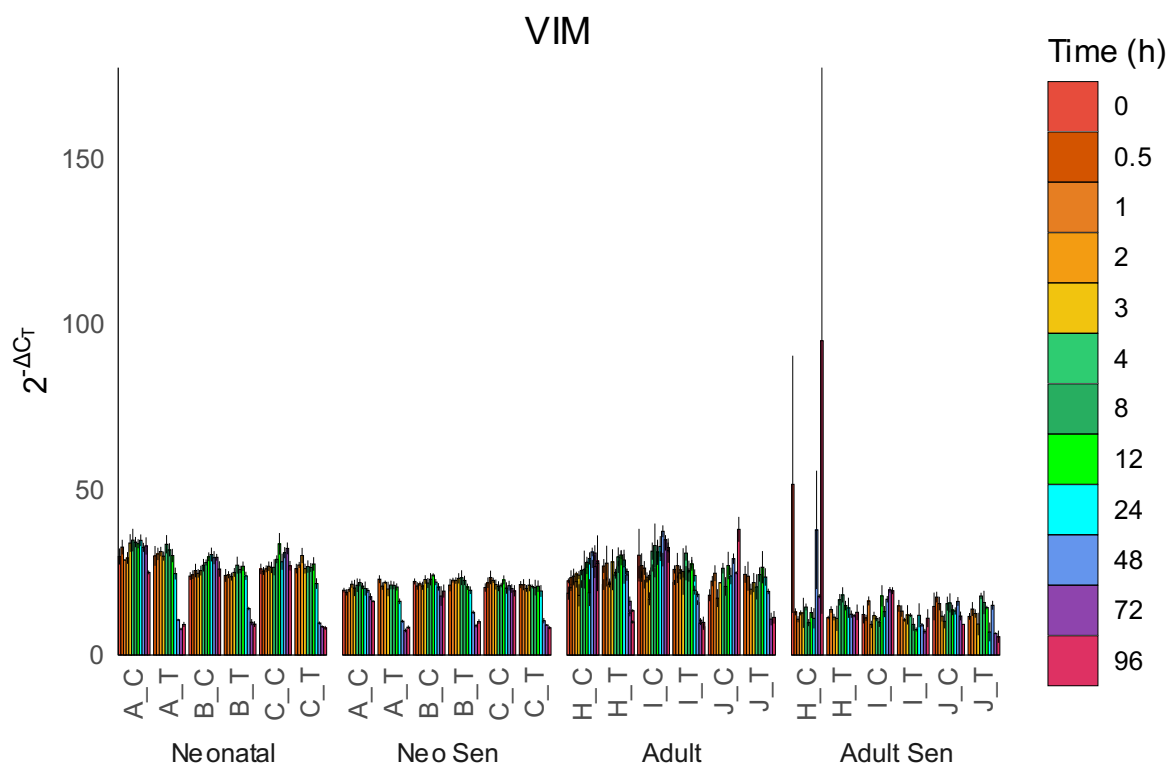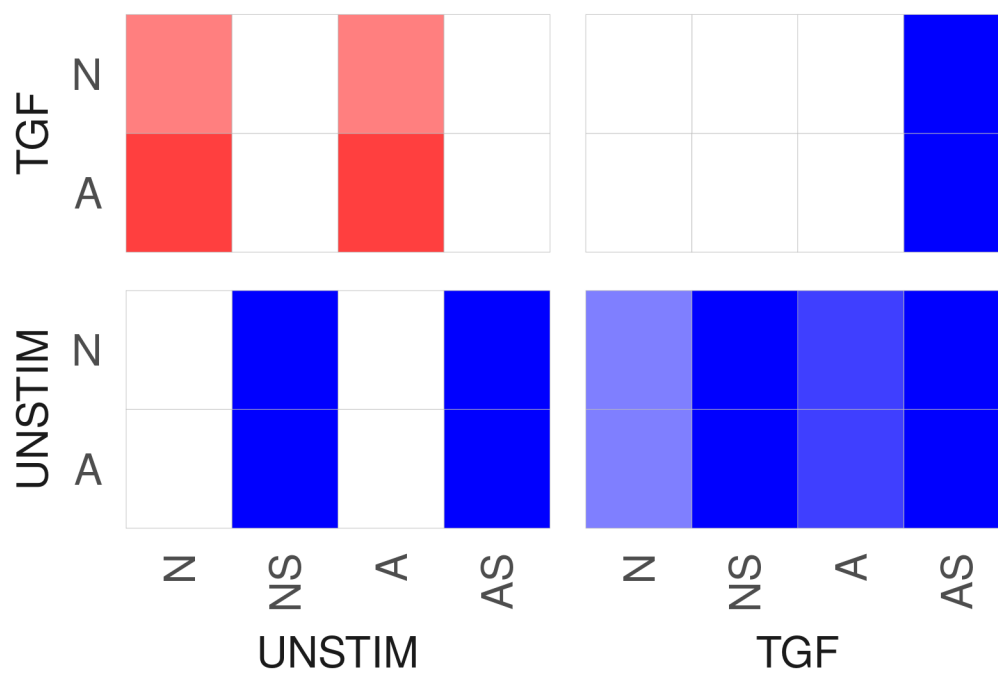

Supplement: s1 [file s1]
