# Supplementary material for: Cell Senescence-Independent Changes of Human Skin Fibroblasts with Age
Source: MDPI journal article supplement (doi:10.3390/cells13080659), 2024-04-09

# ACTA2

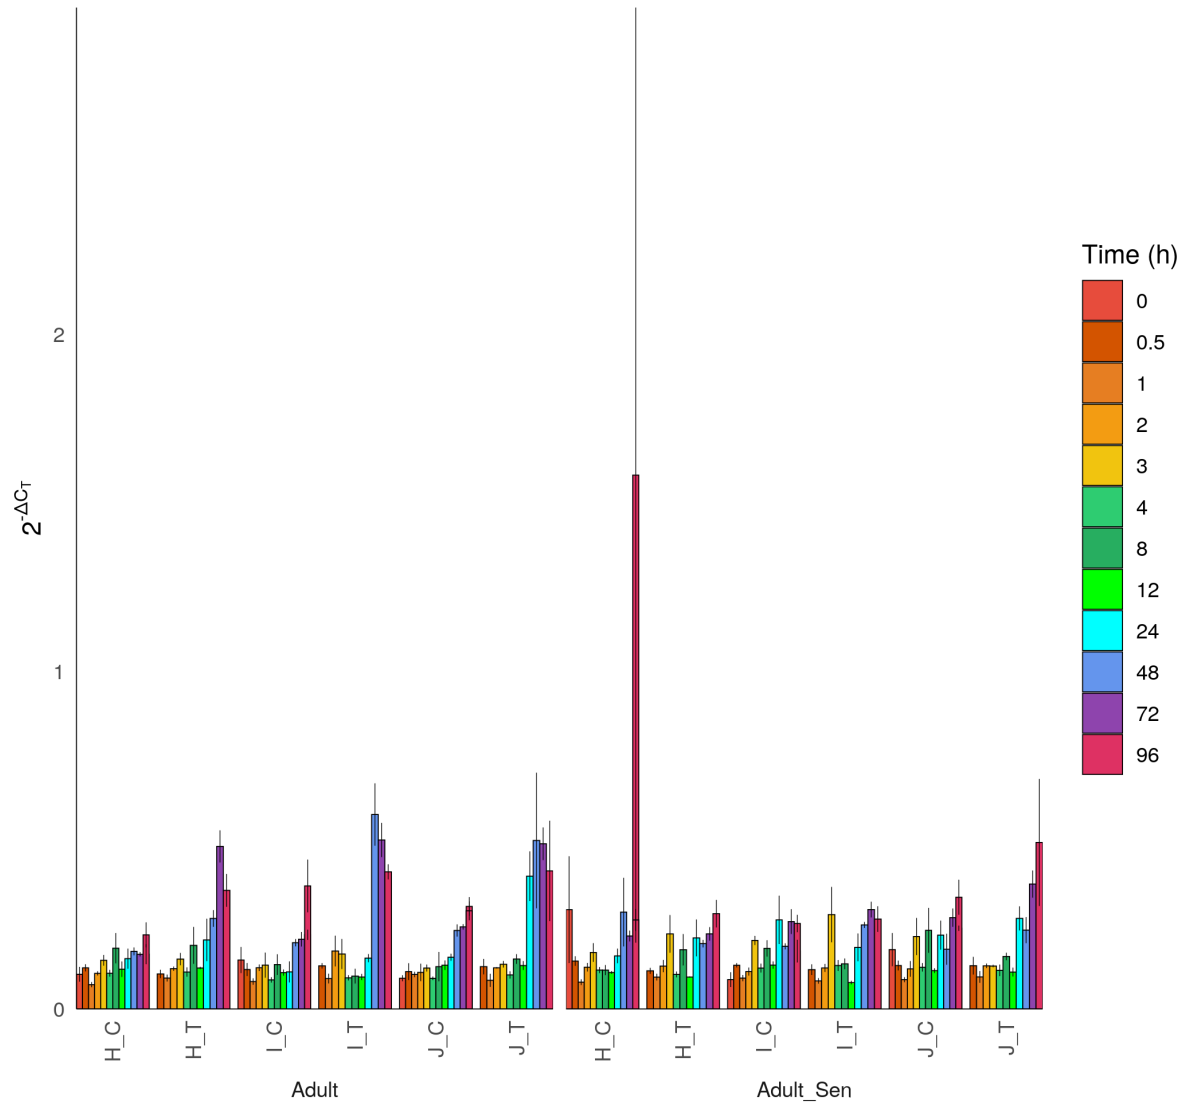

# ADAMTS1

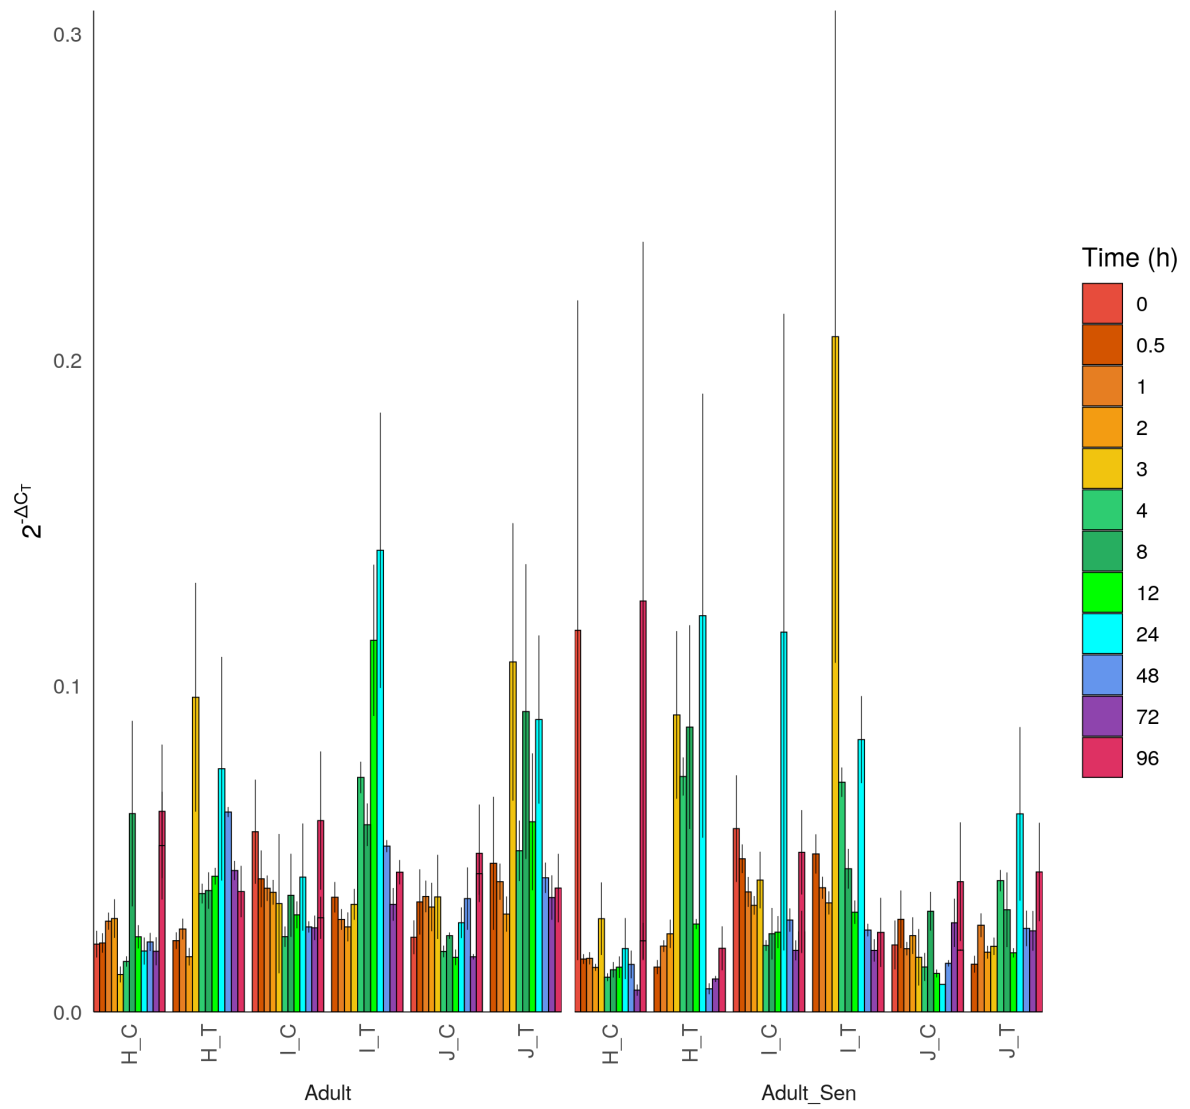

# ATP6AP1

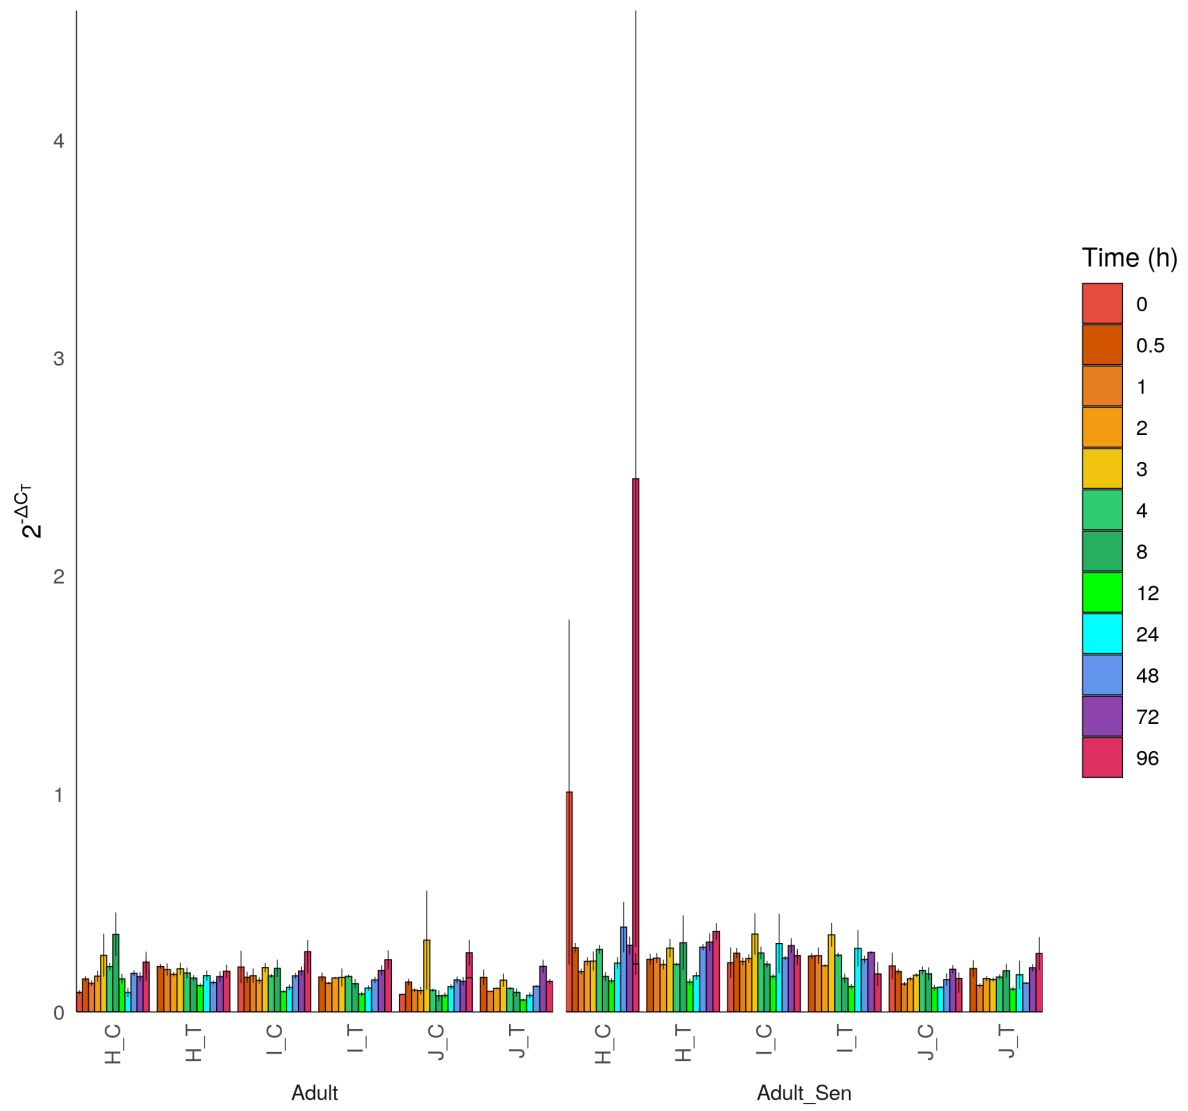

B2M

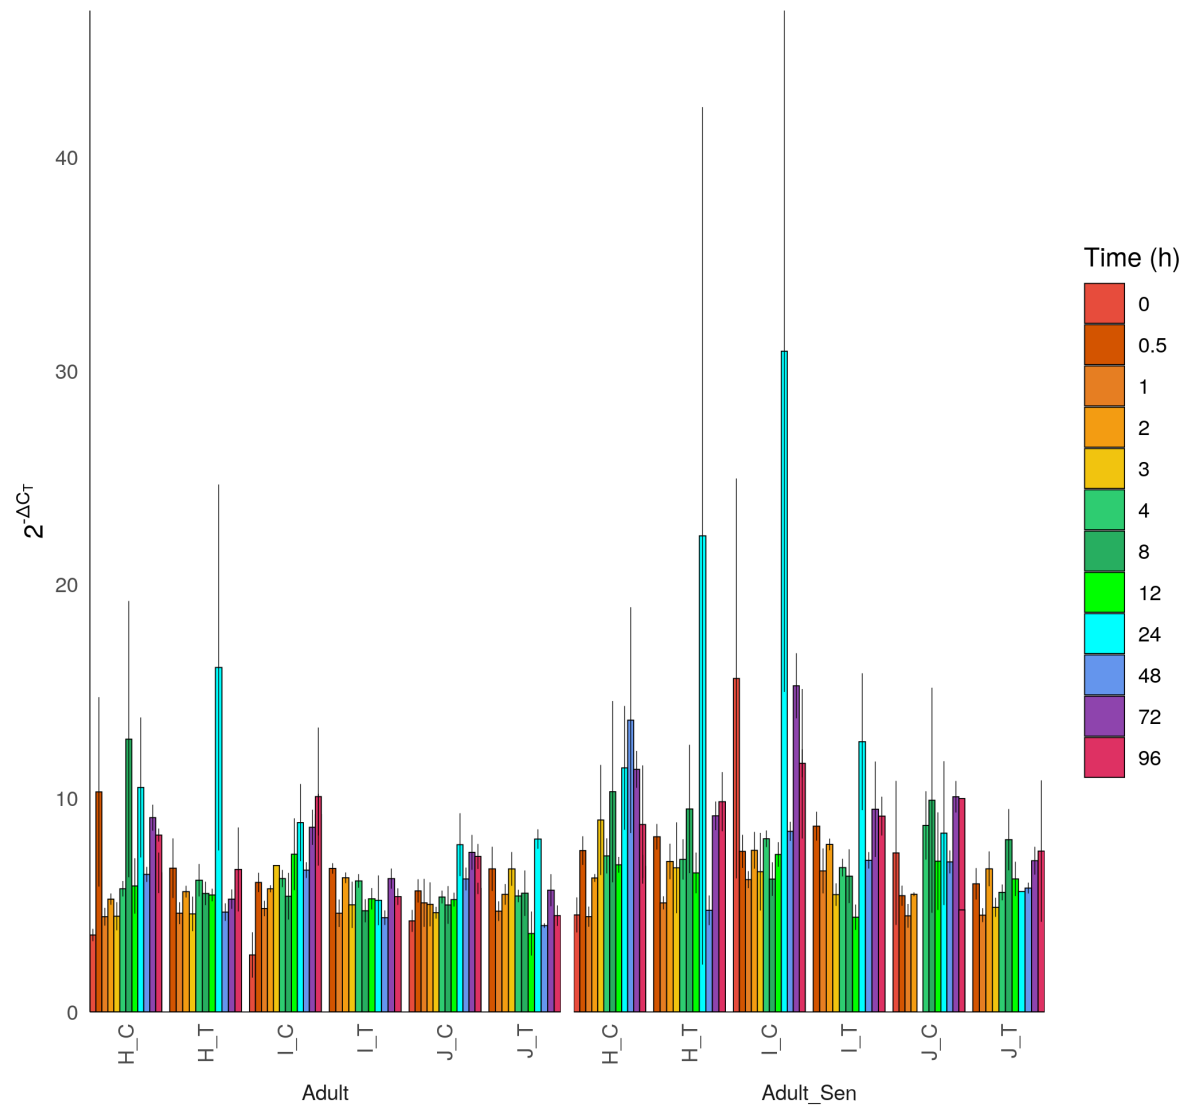



# BGN

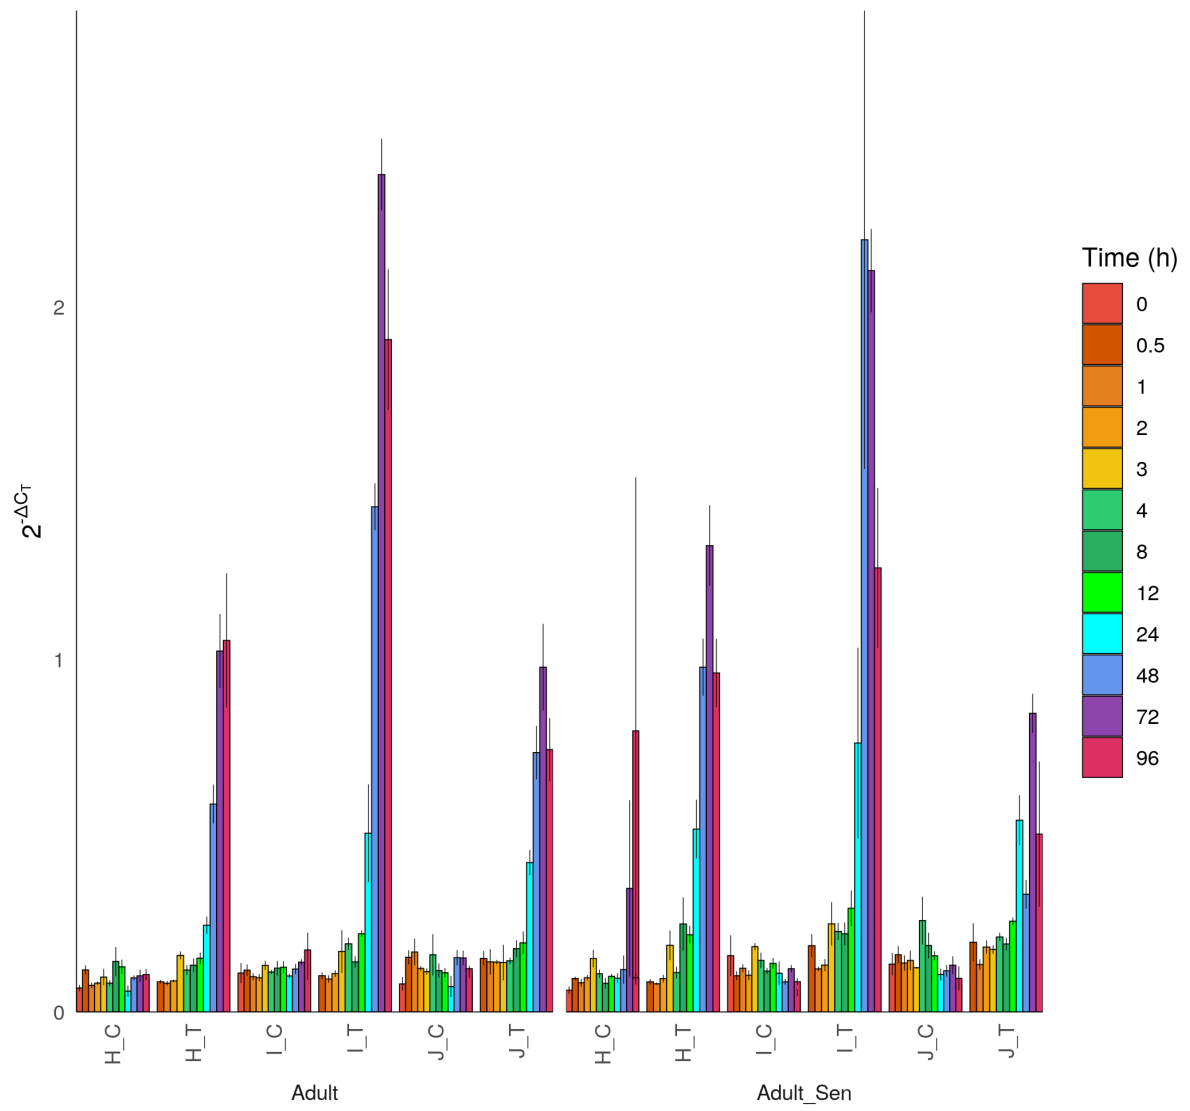

BHLHE40

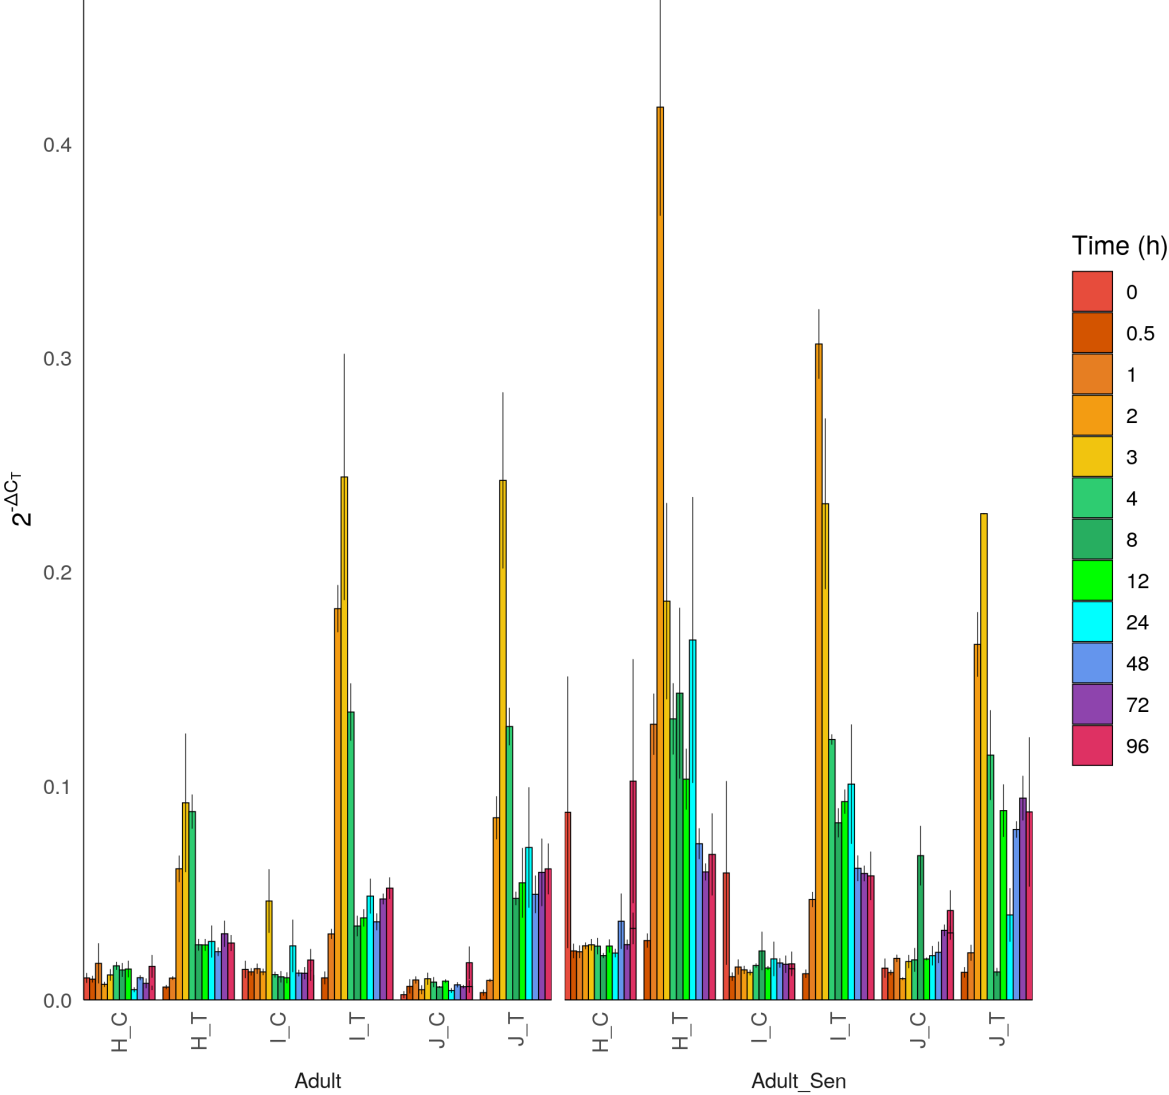

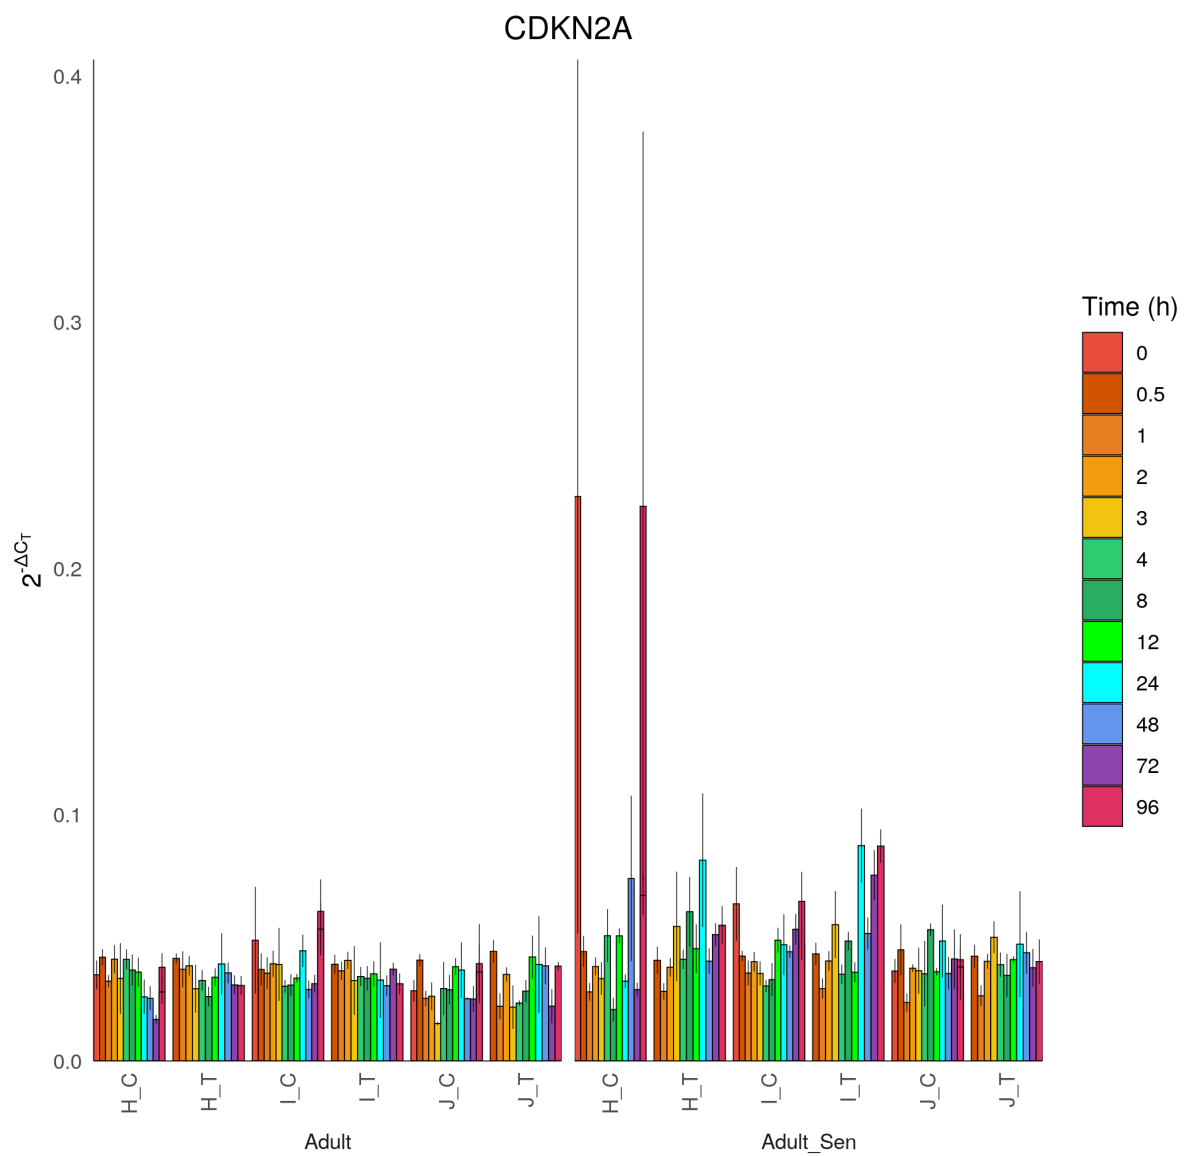

# COL1A1

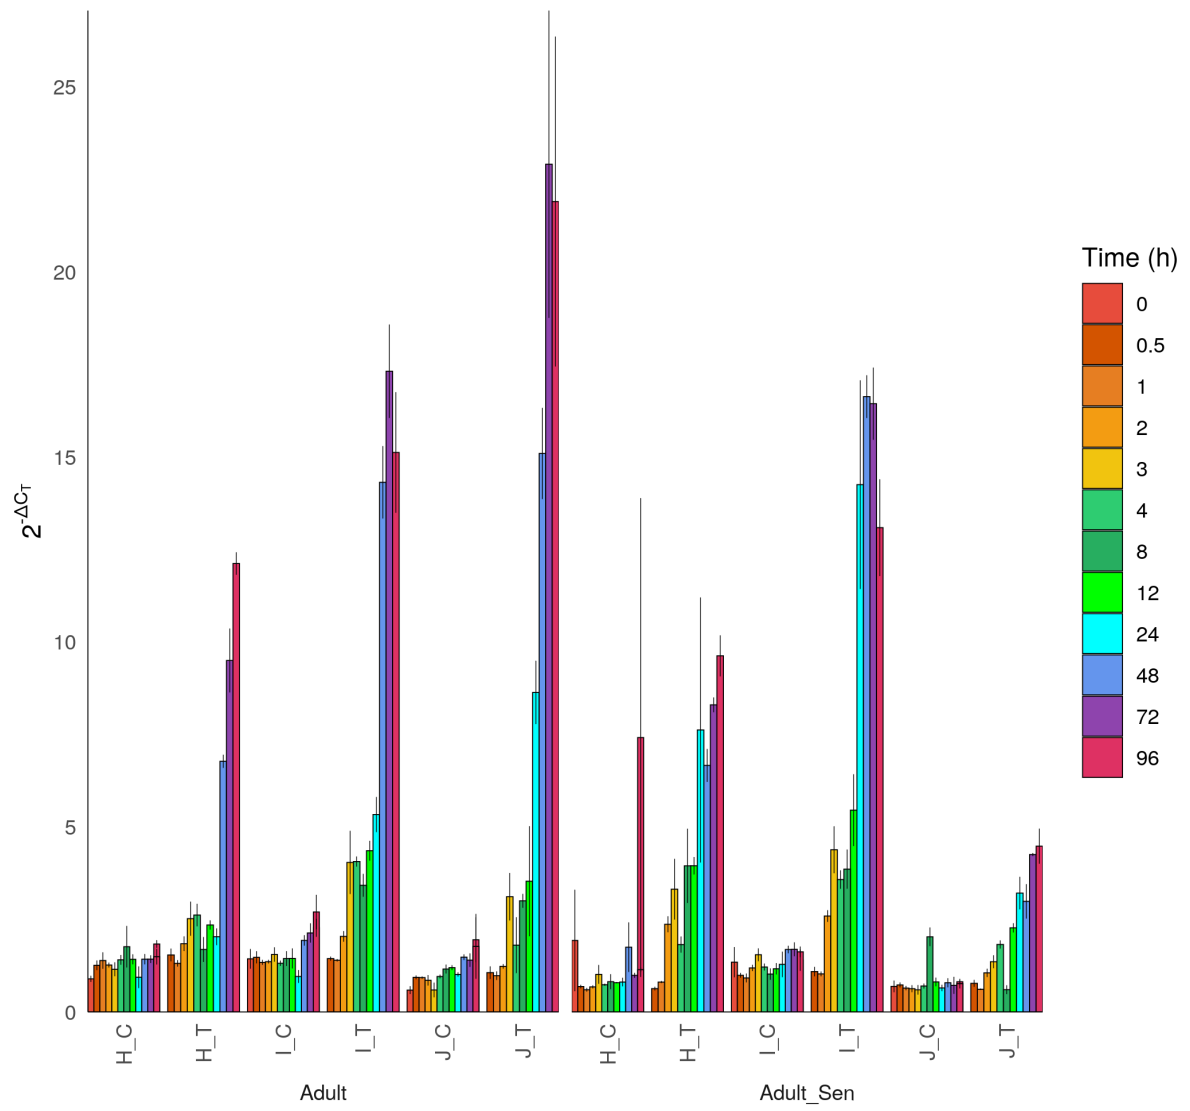

COL1A2

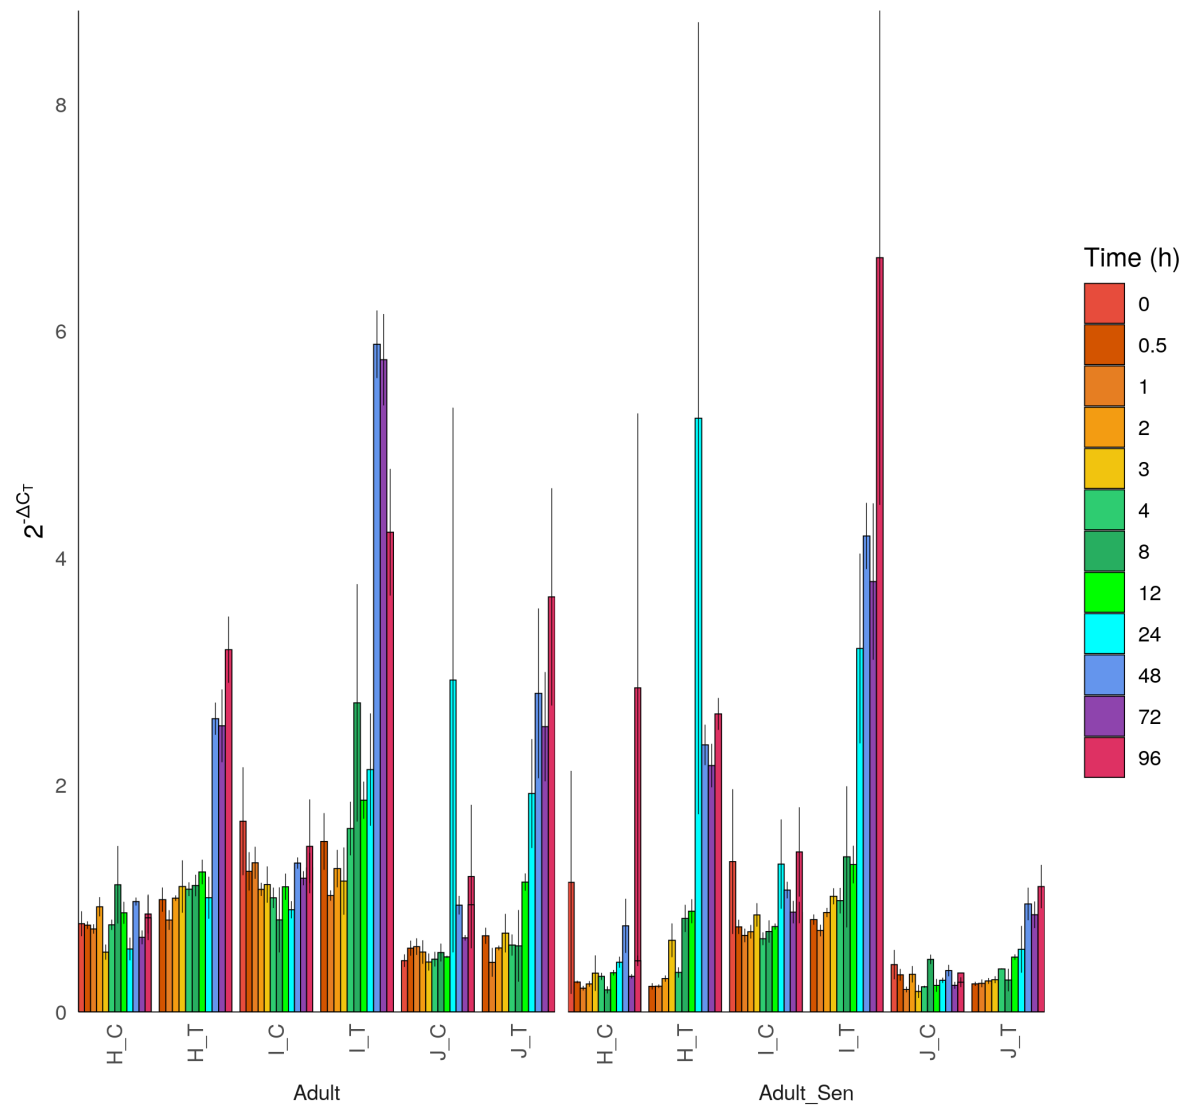

# COL4A1

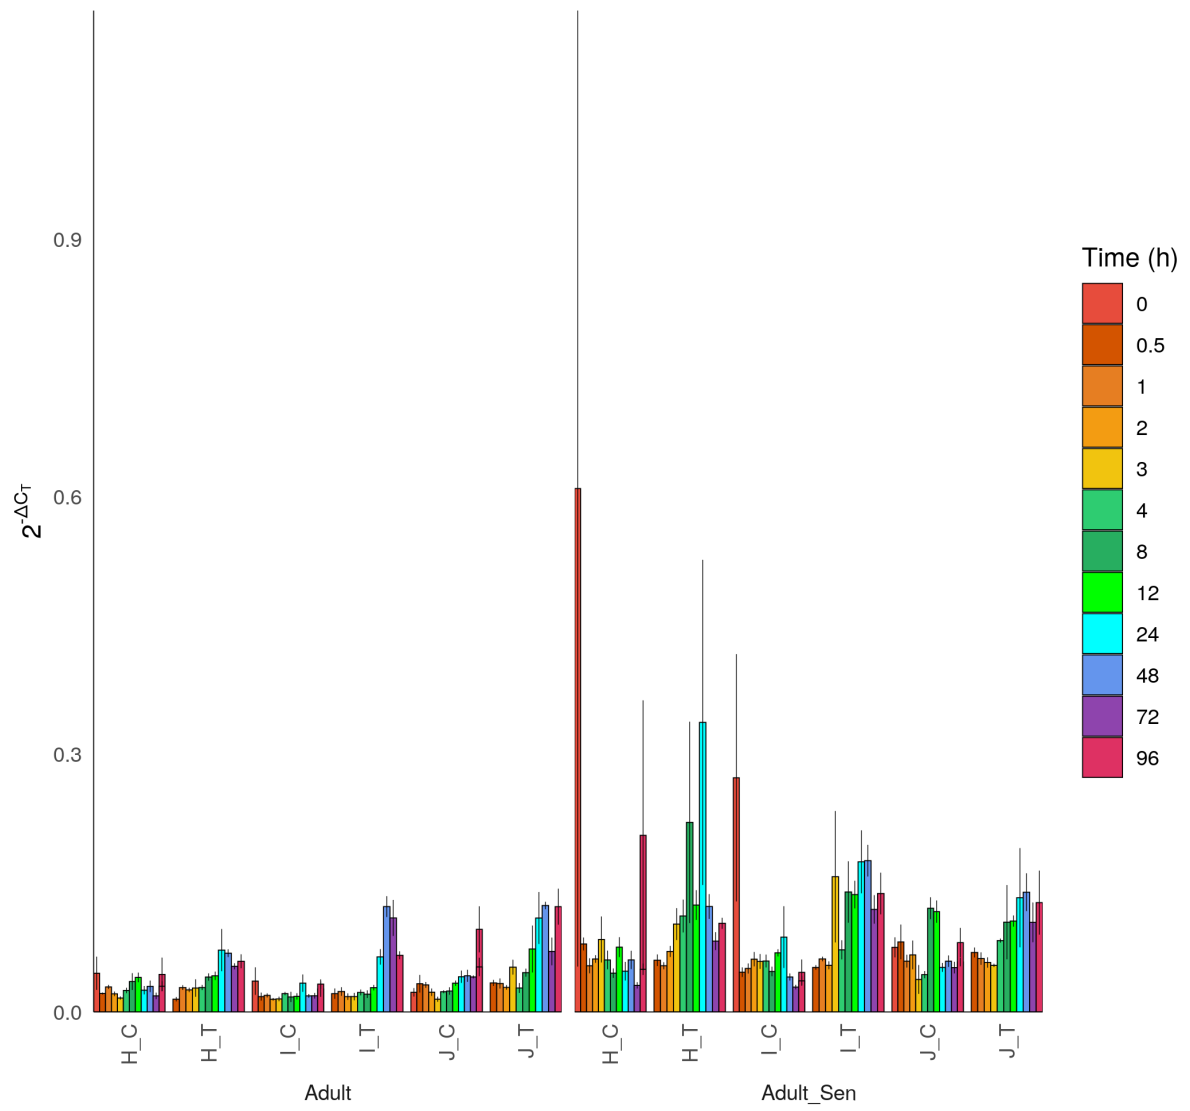

COL5A1

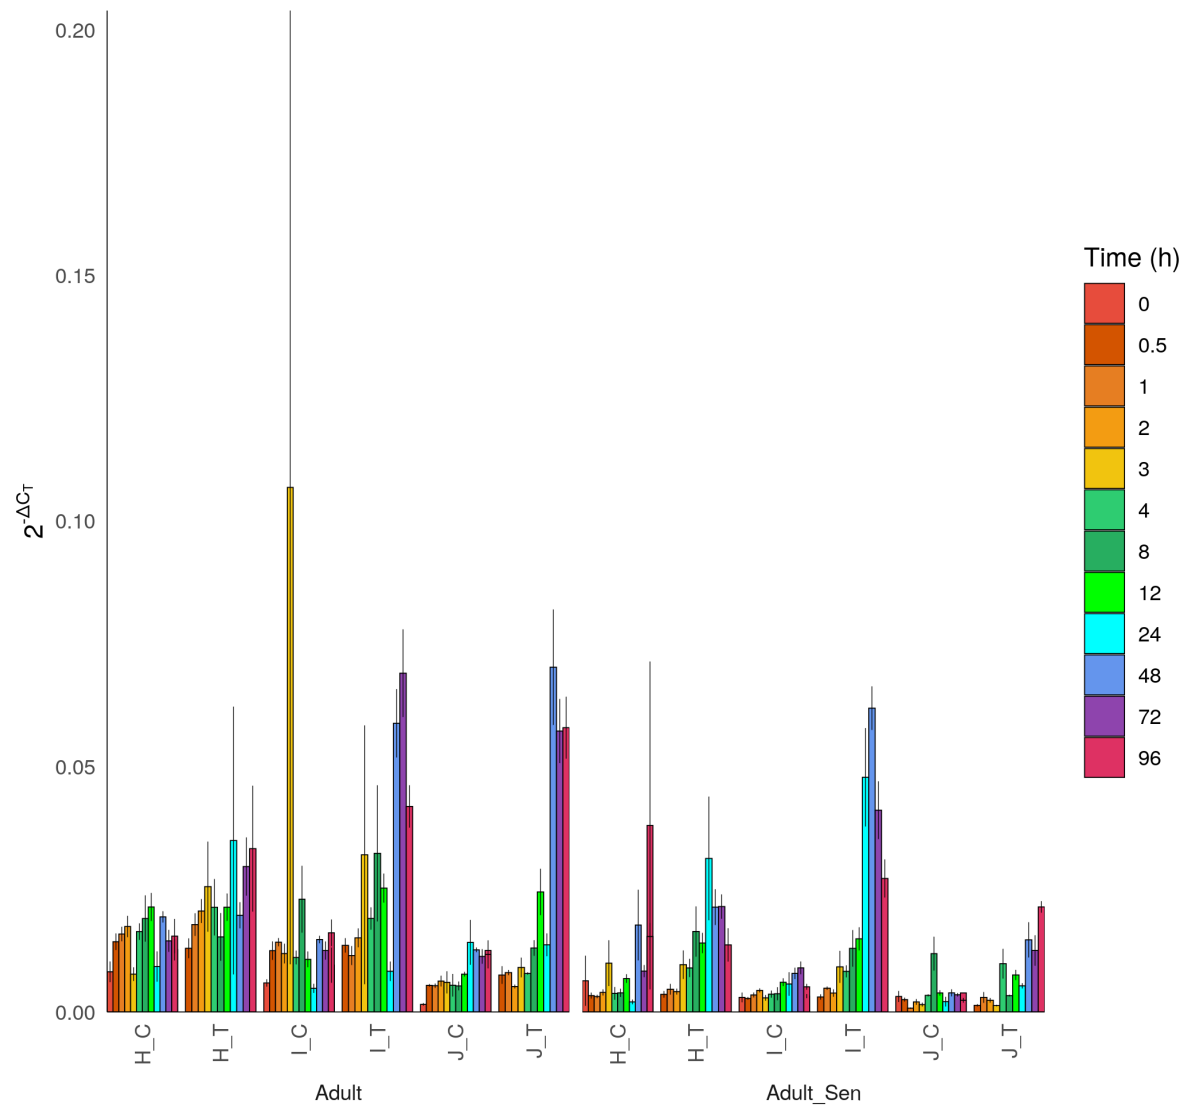

CTGF

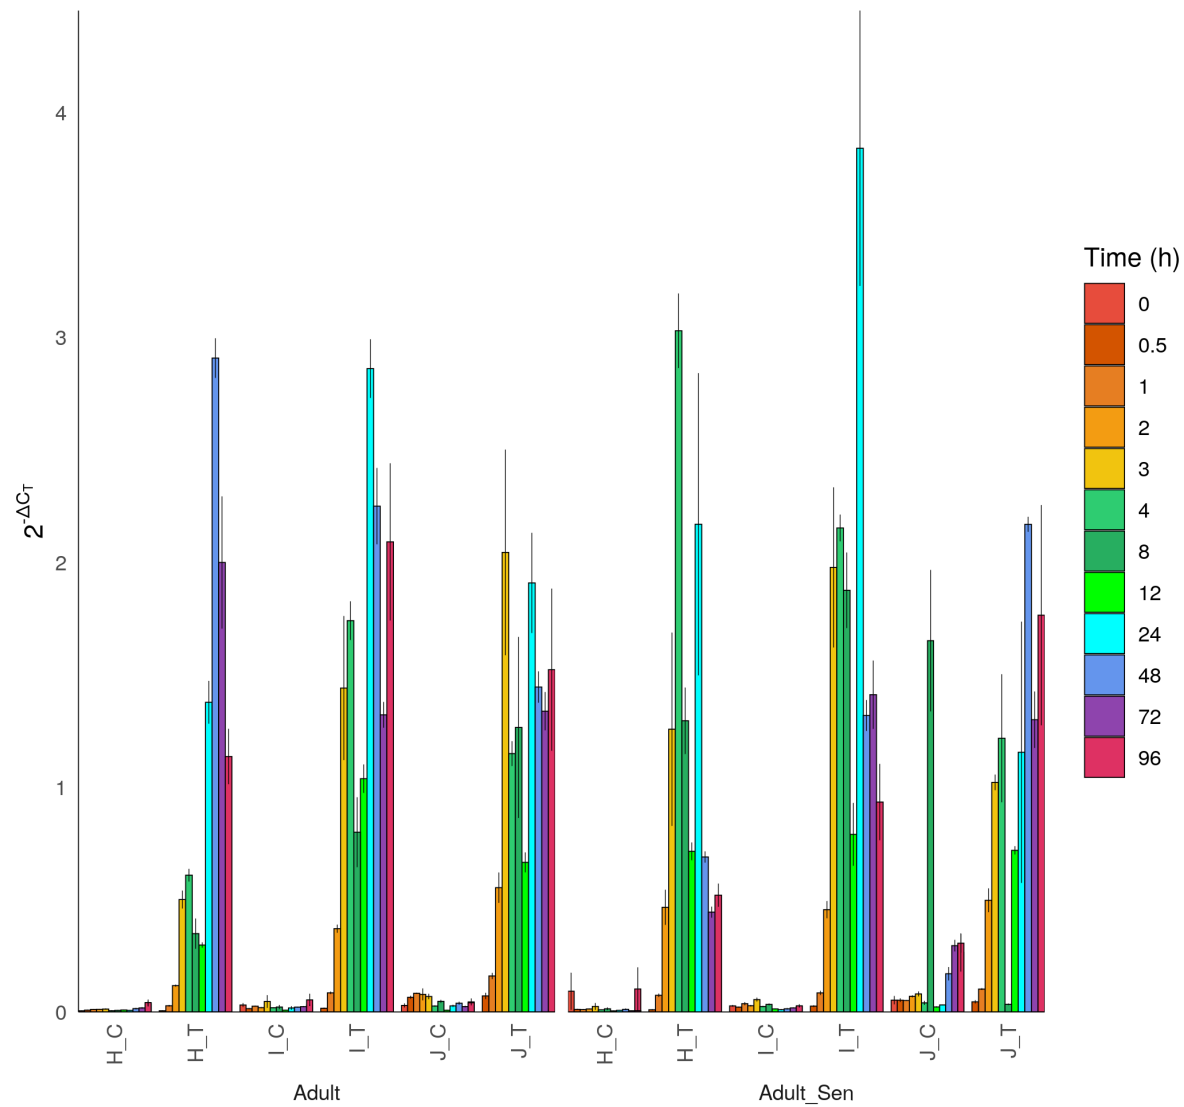



# DCN

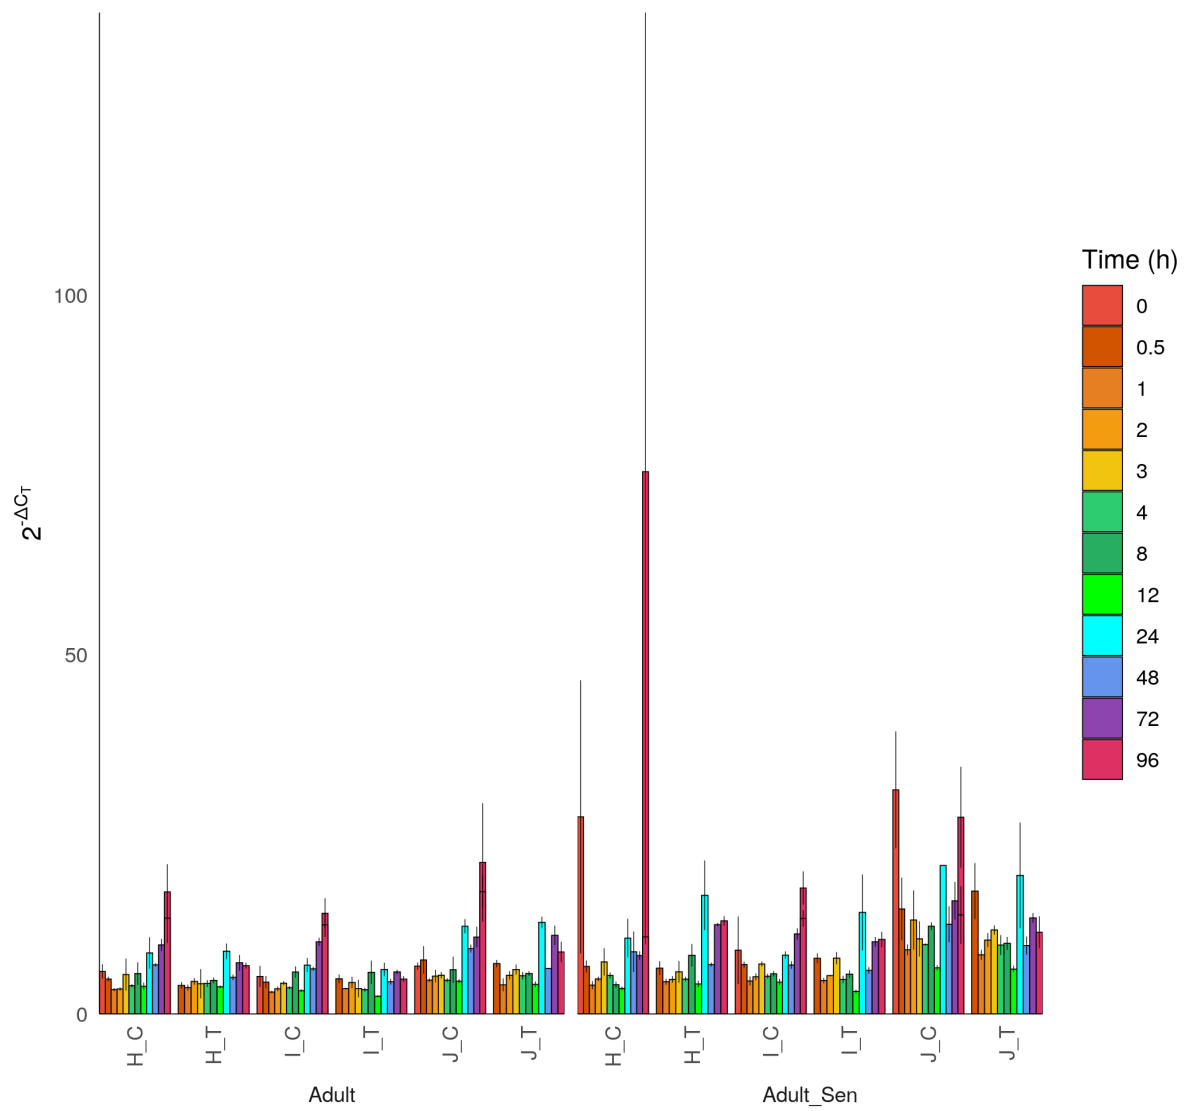

ENG

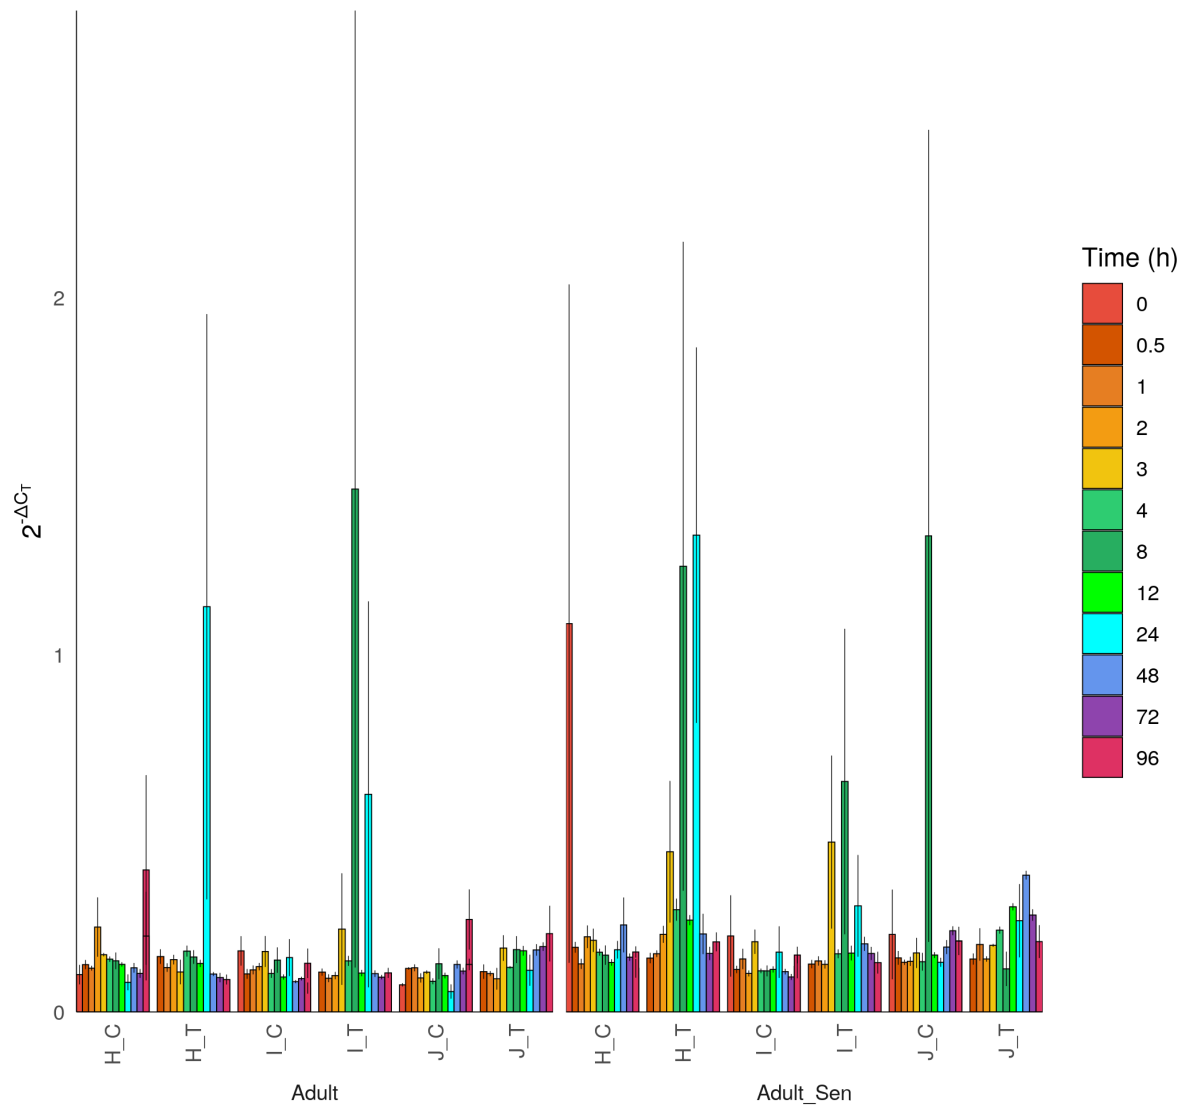

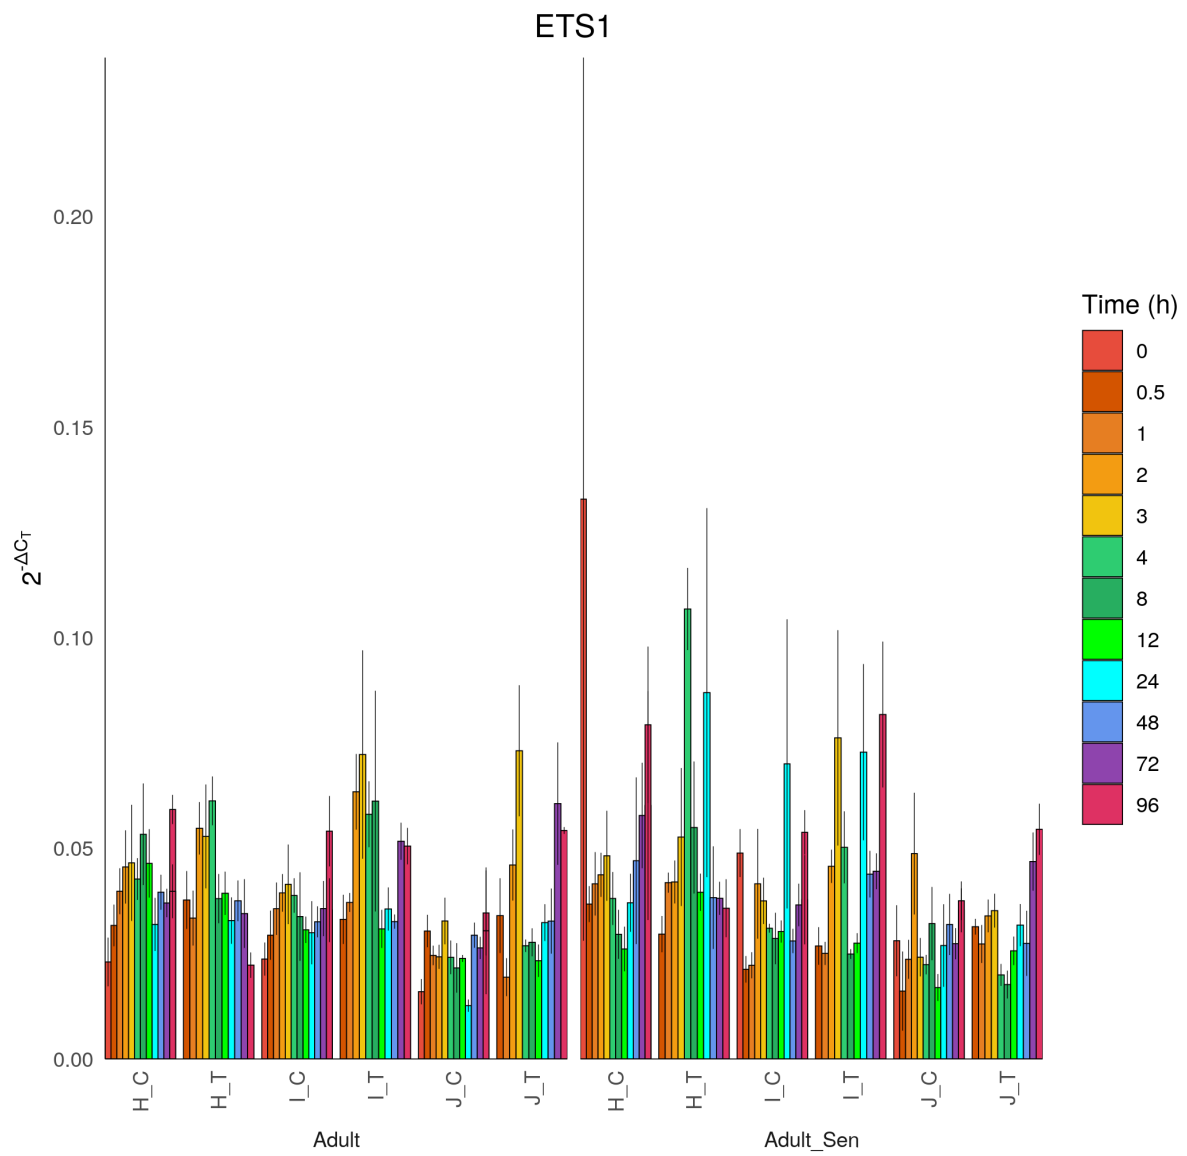

# FBLN1

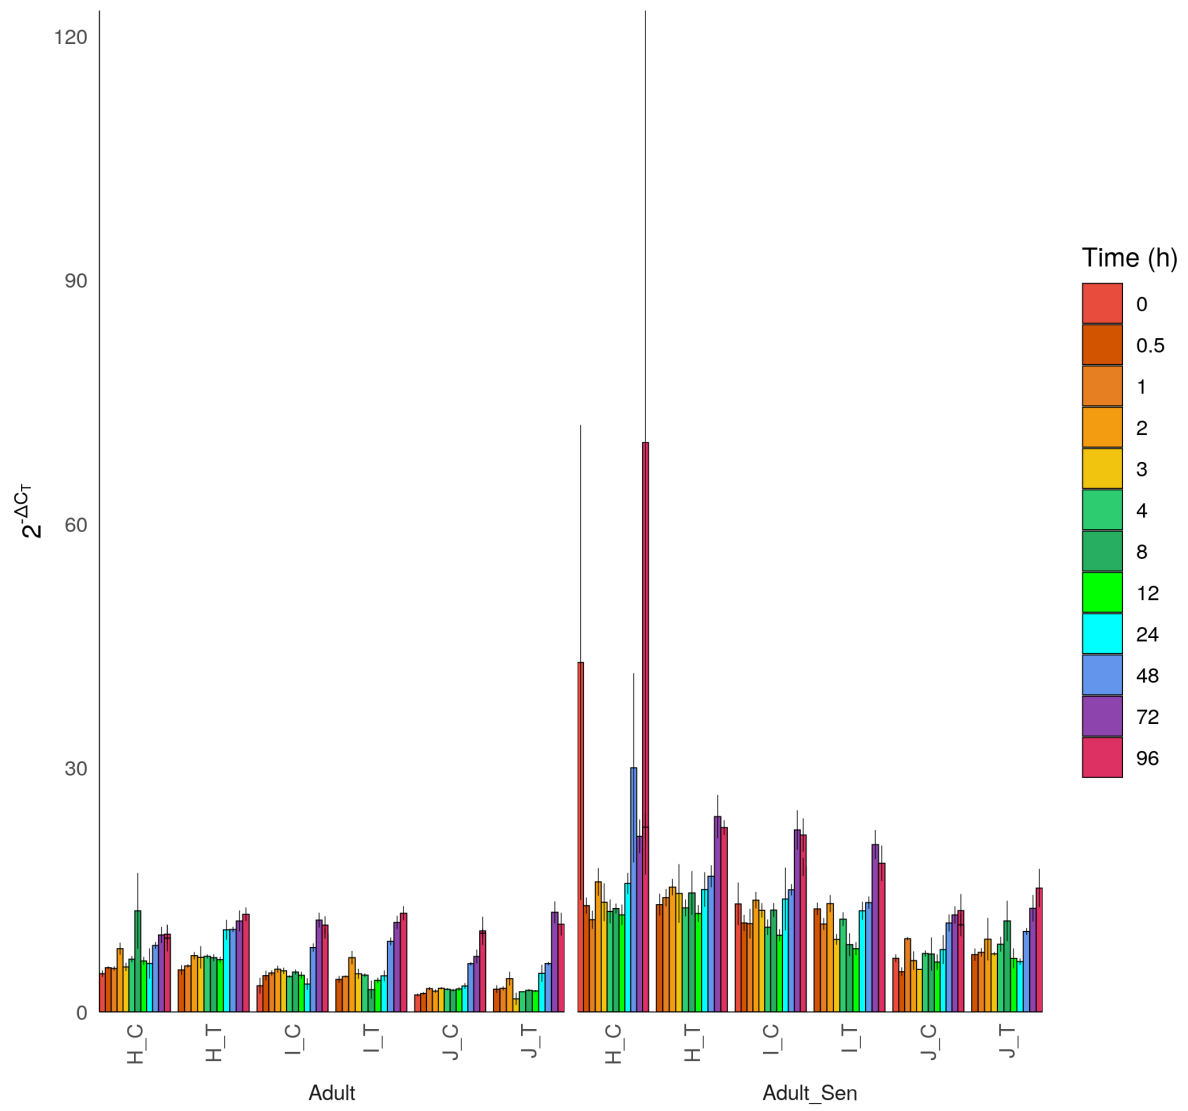

# FBN1

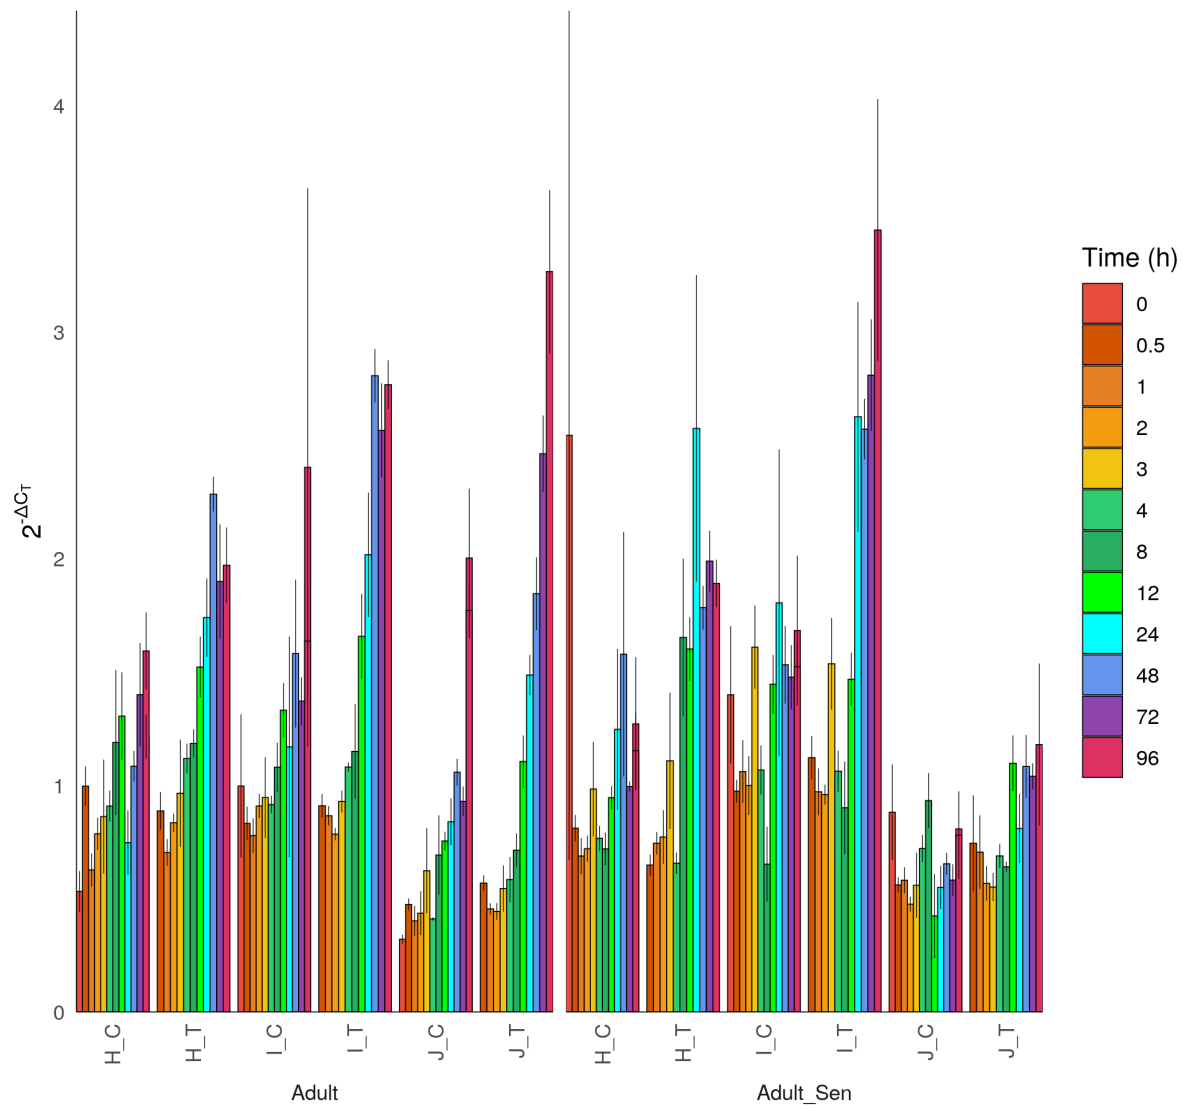

FN1

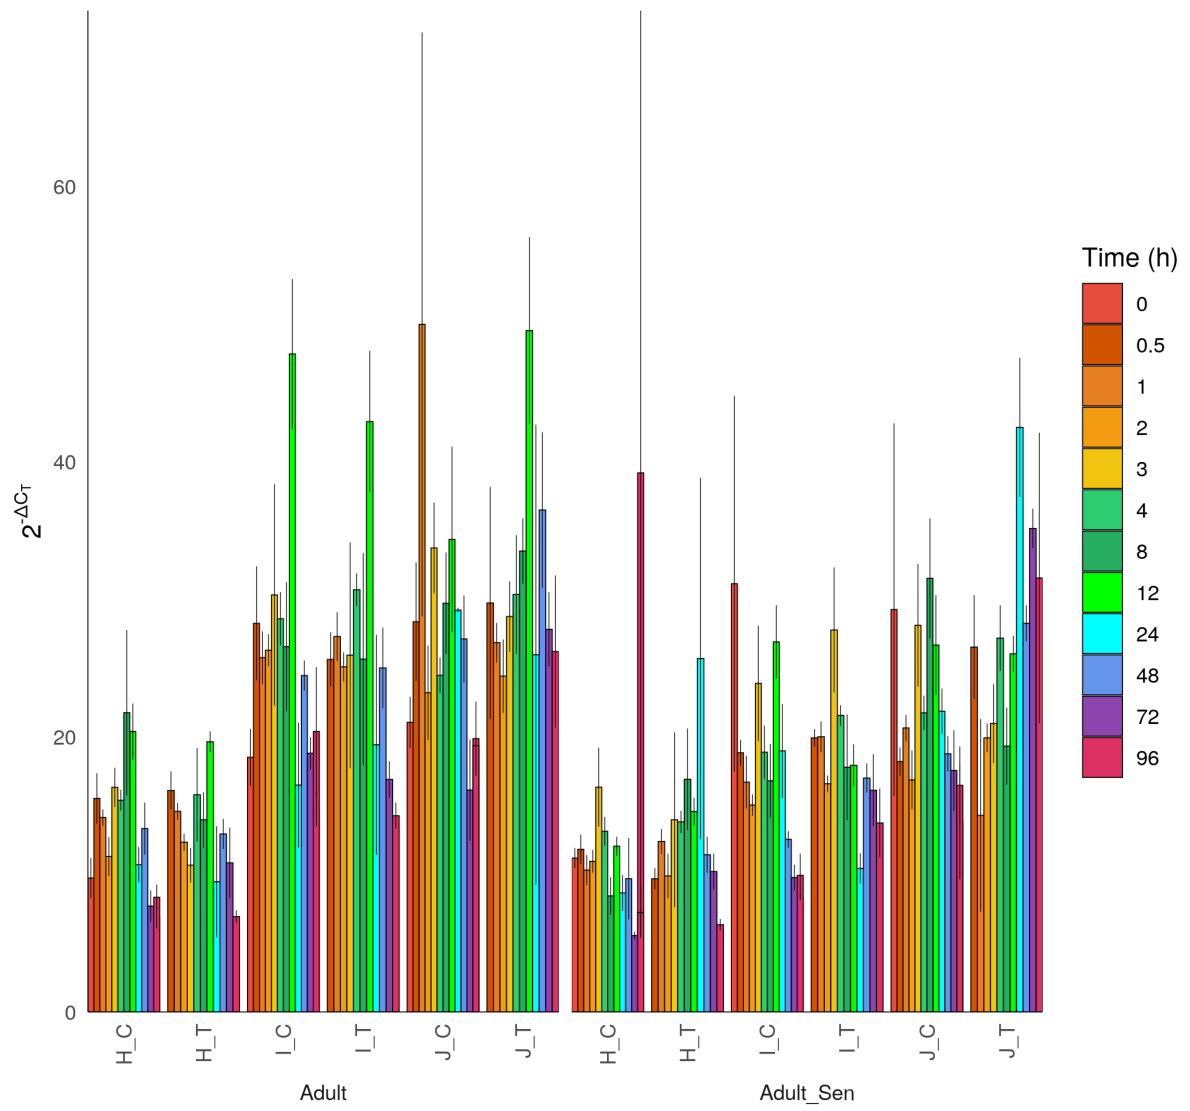

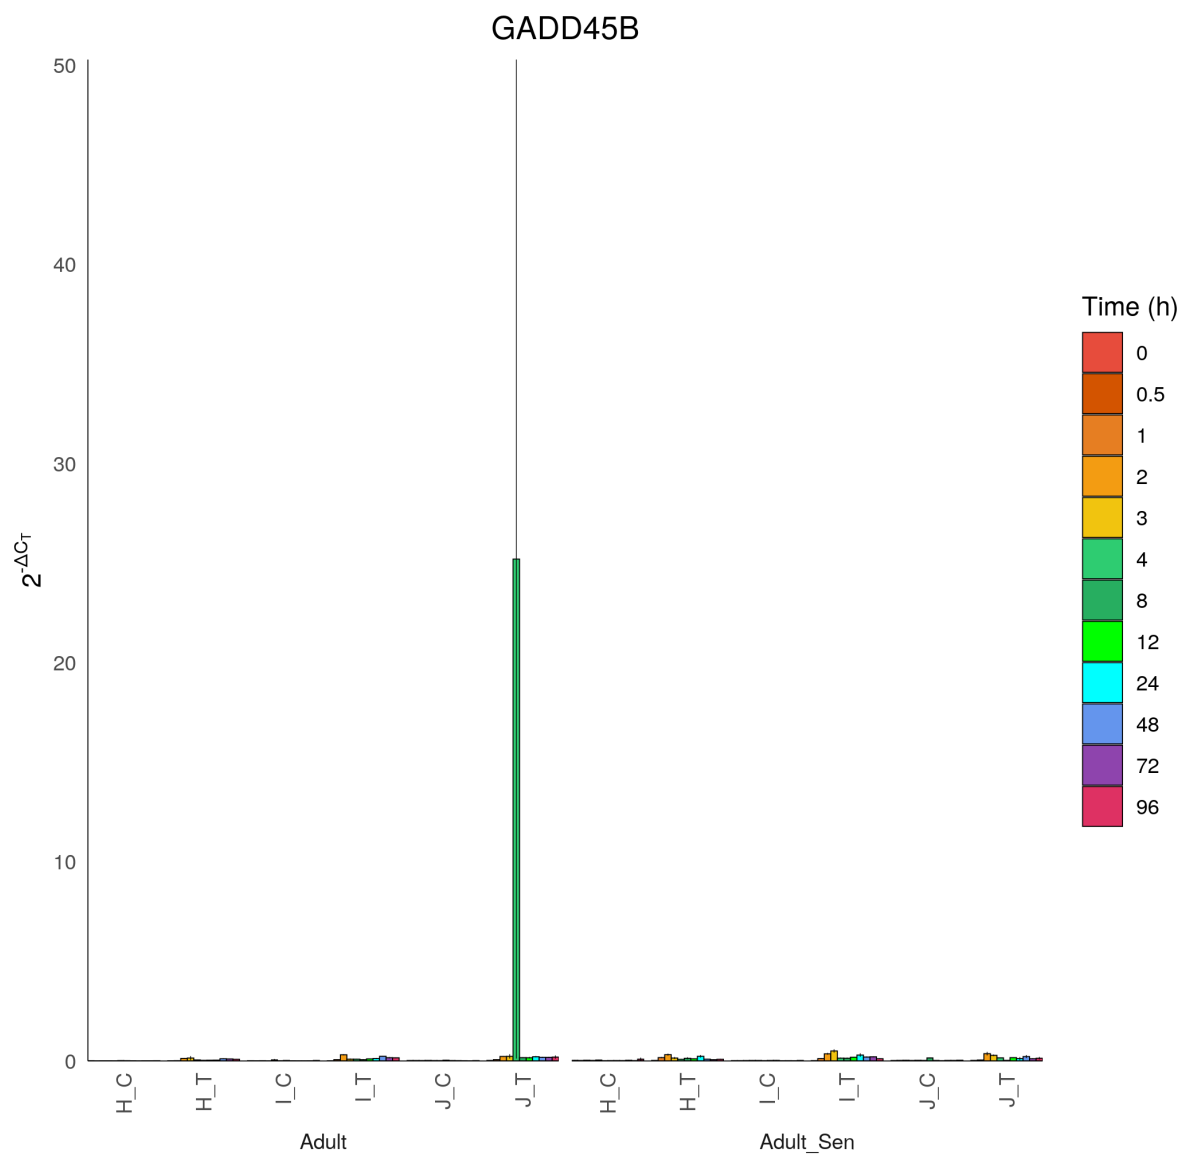

HAS2

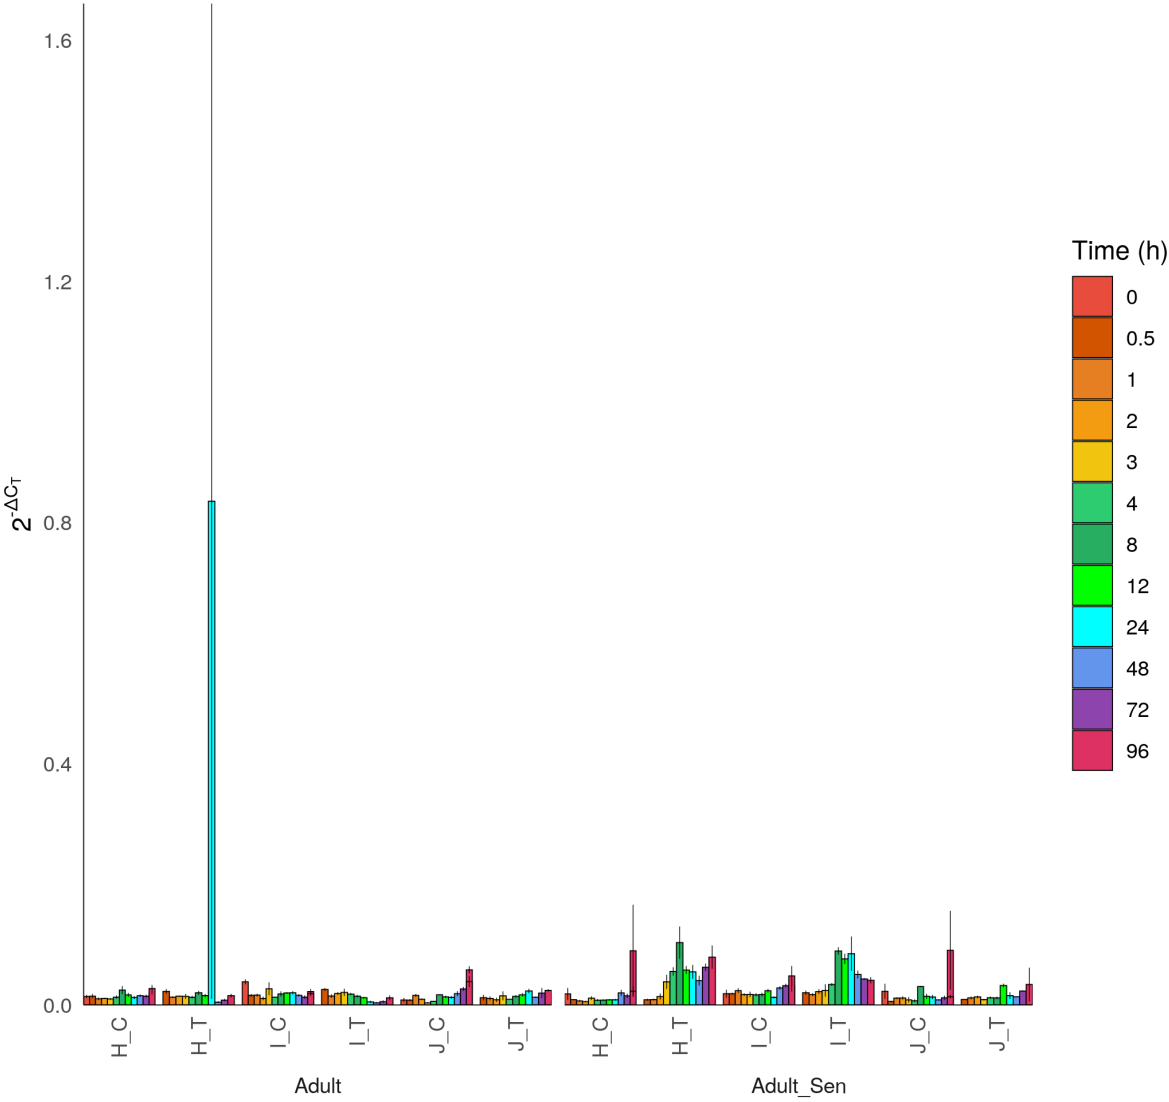



ID1

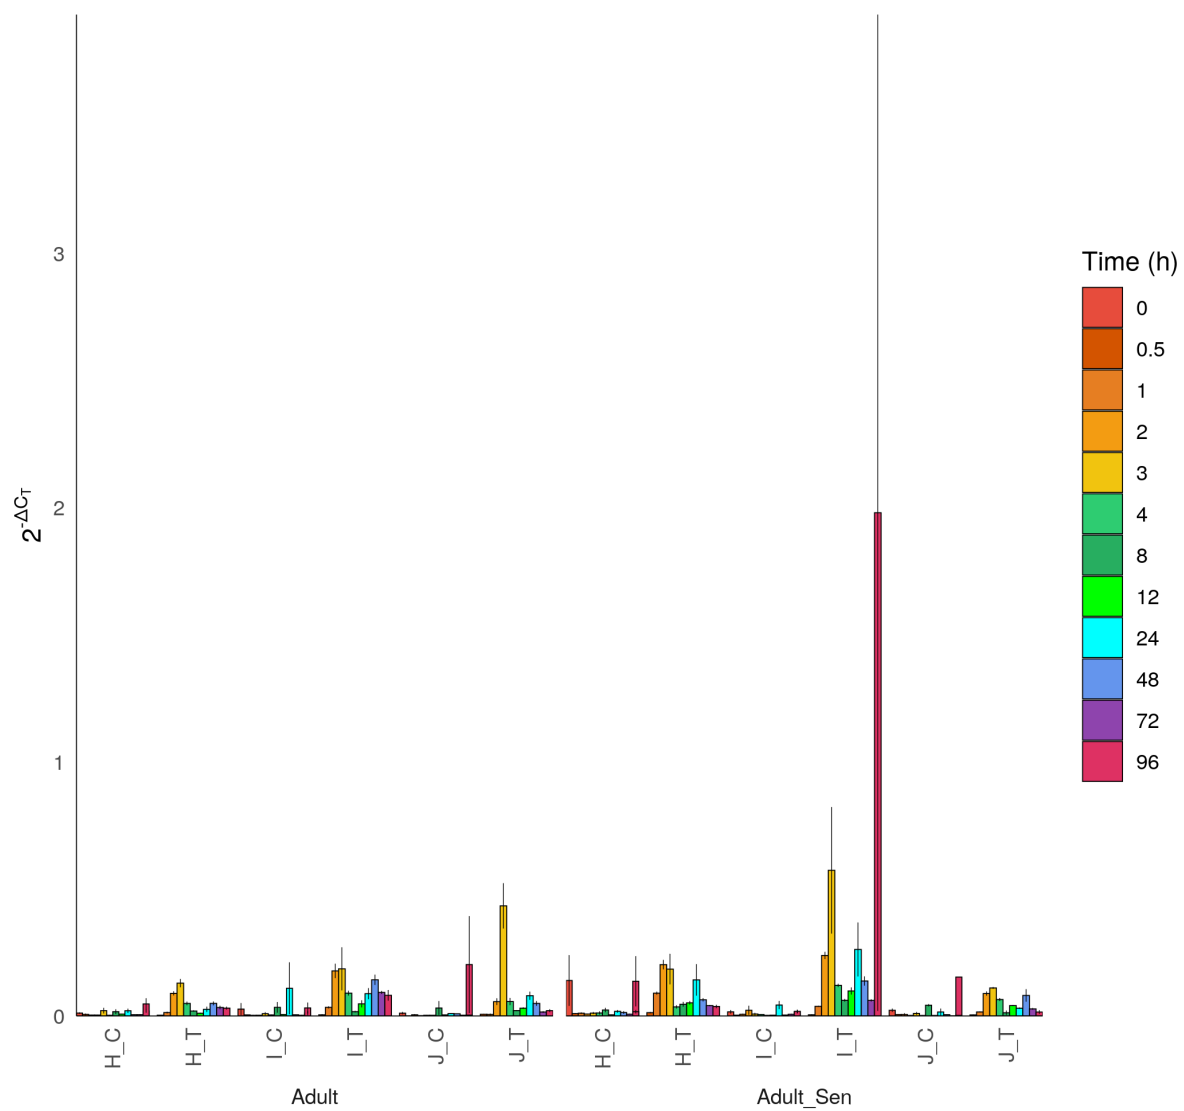

IL6

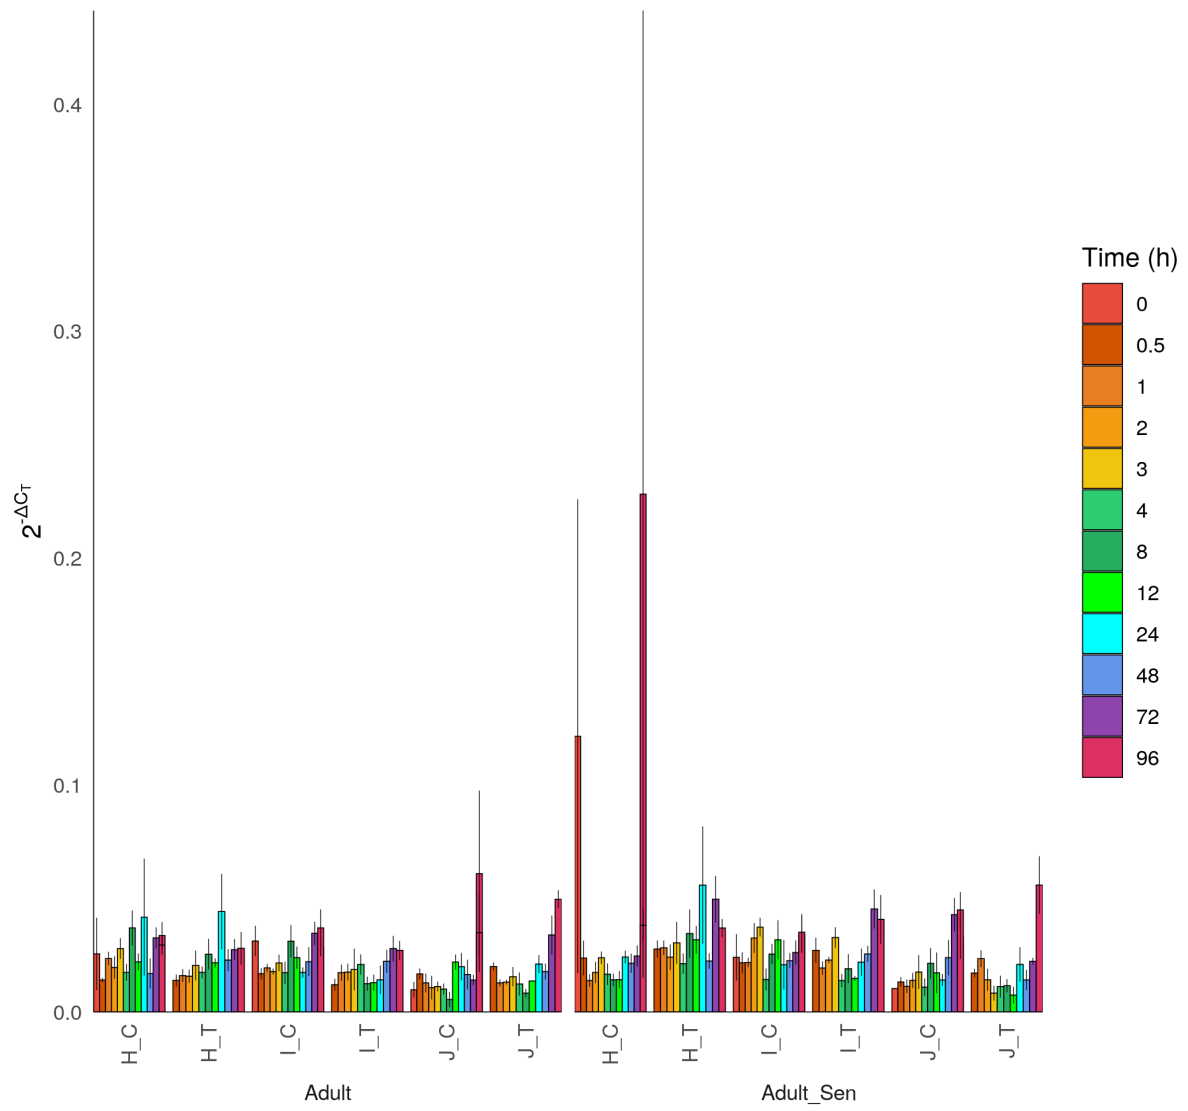

# ITGA1

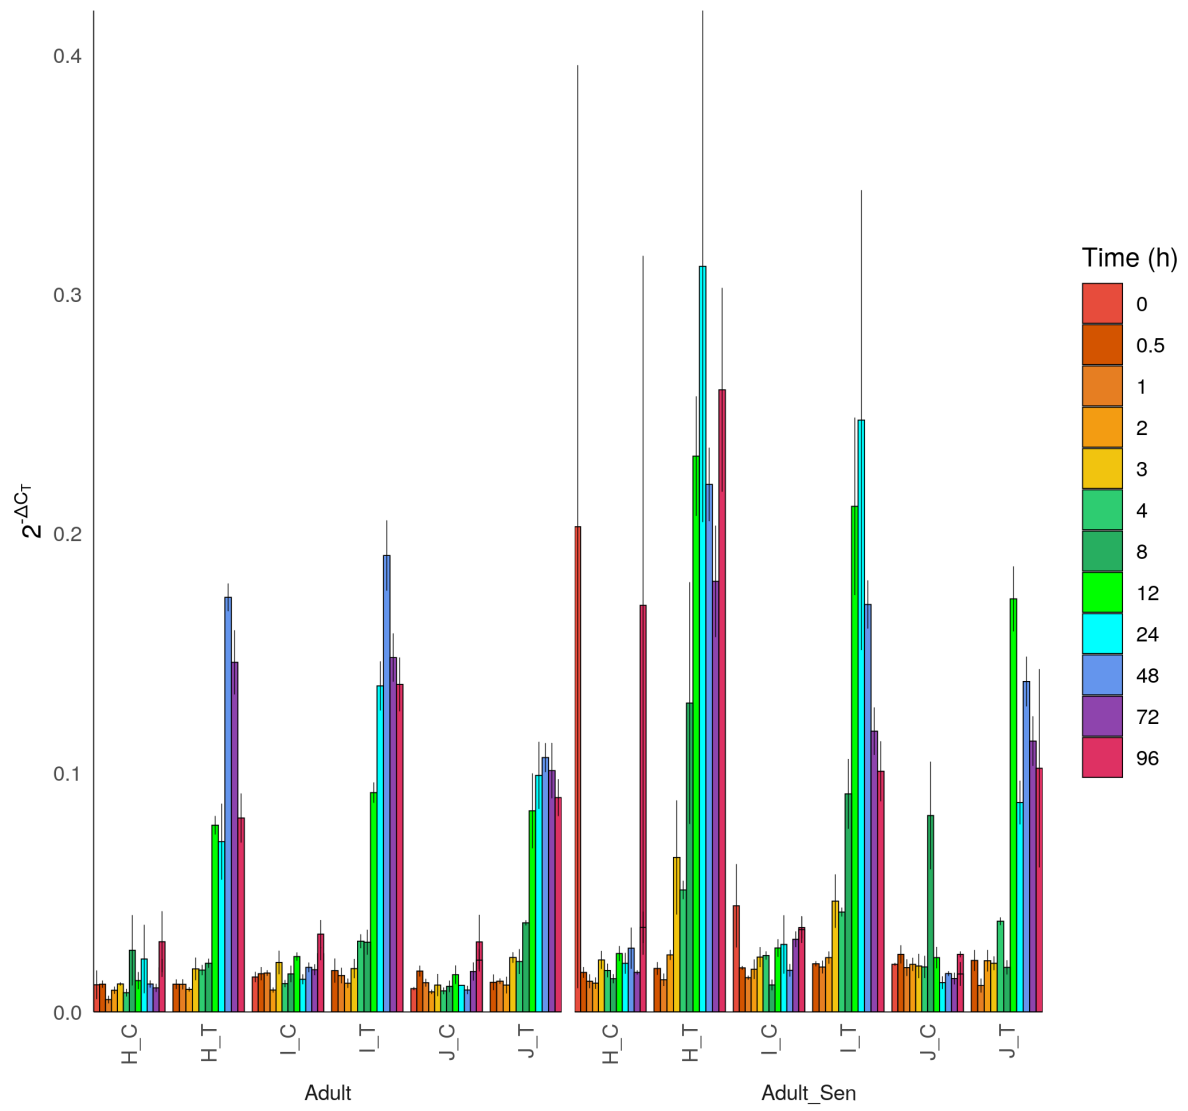

## ITGA2

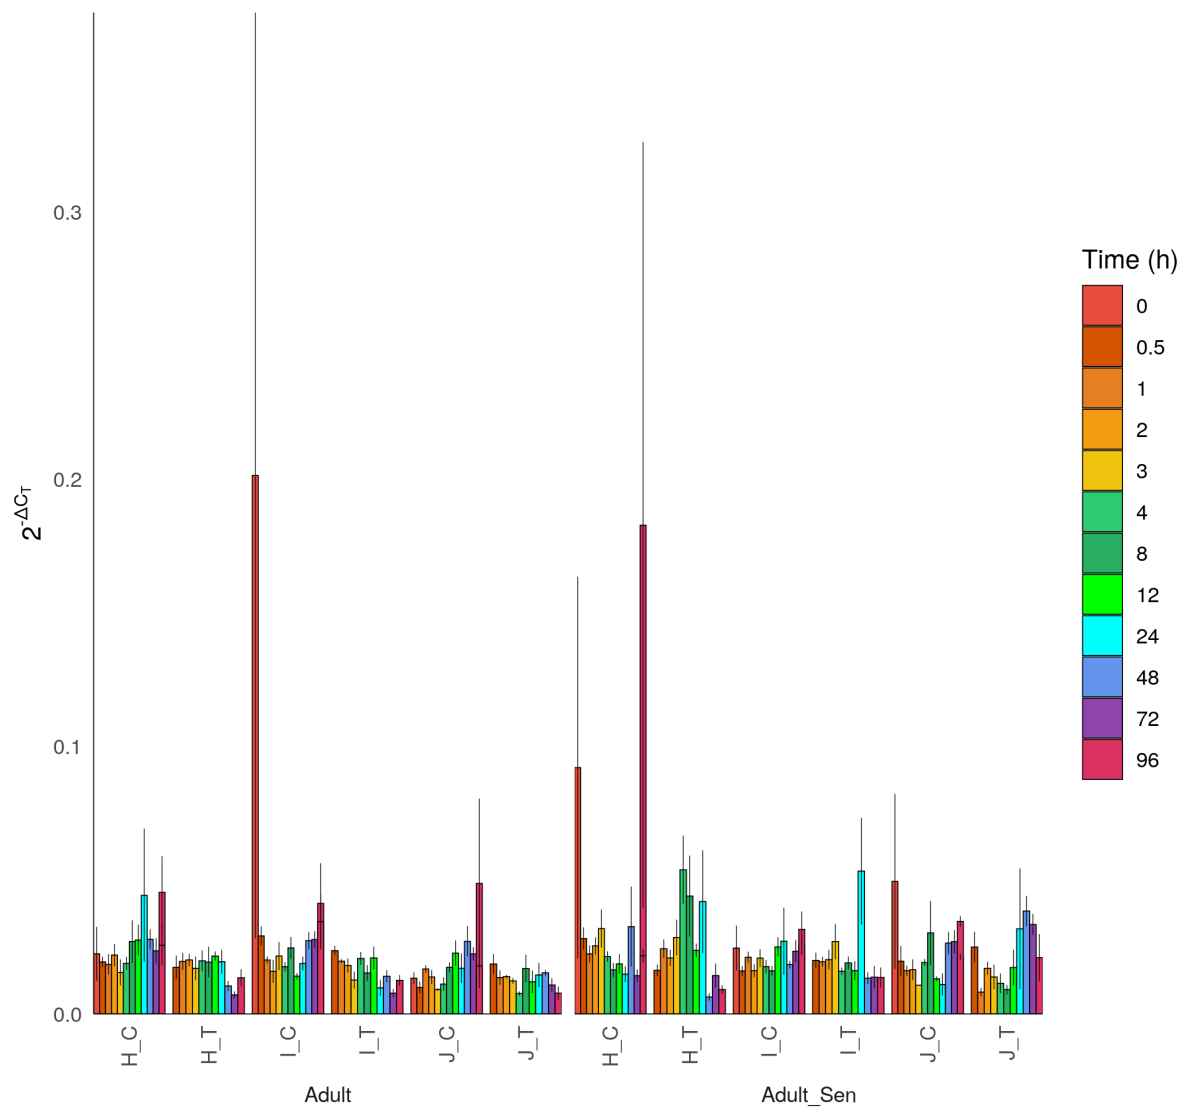

JUN

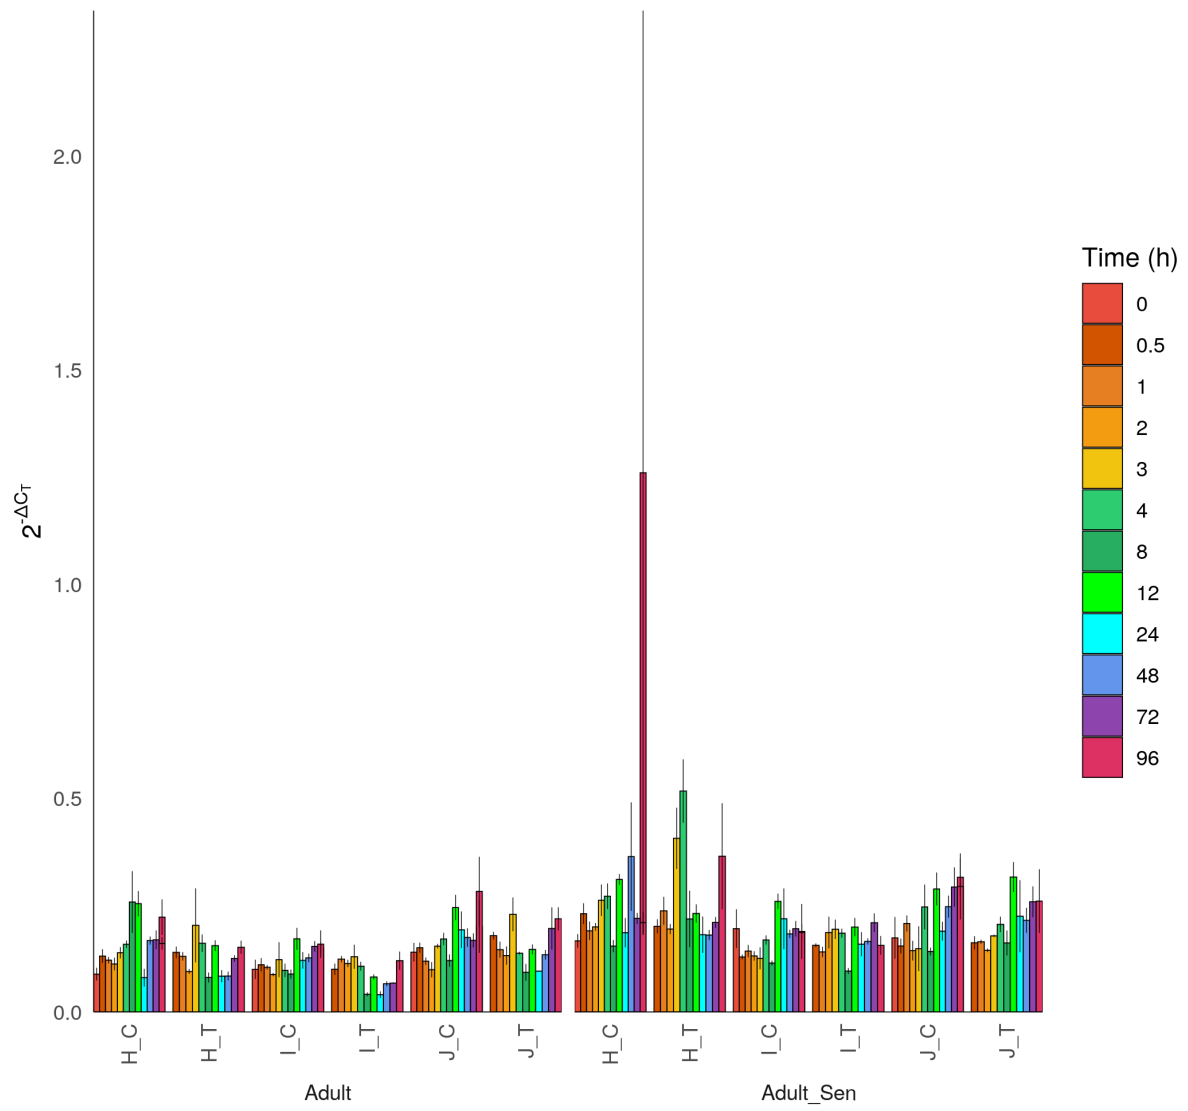

# JUNB

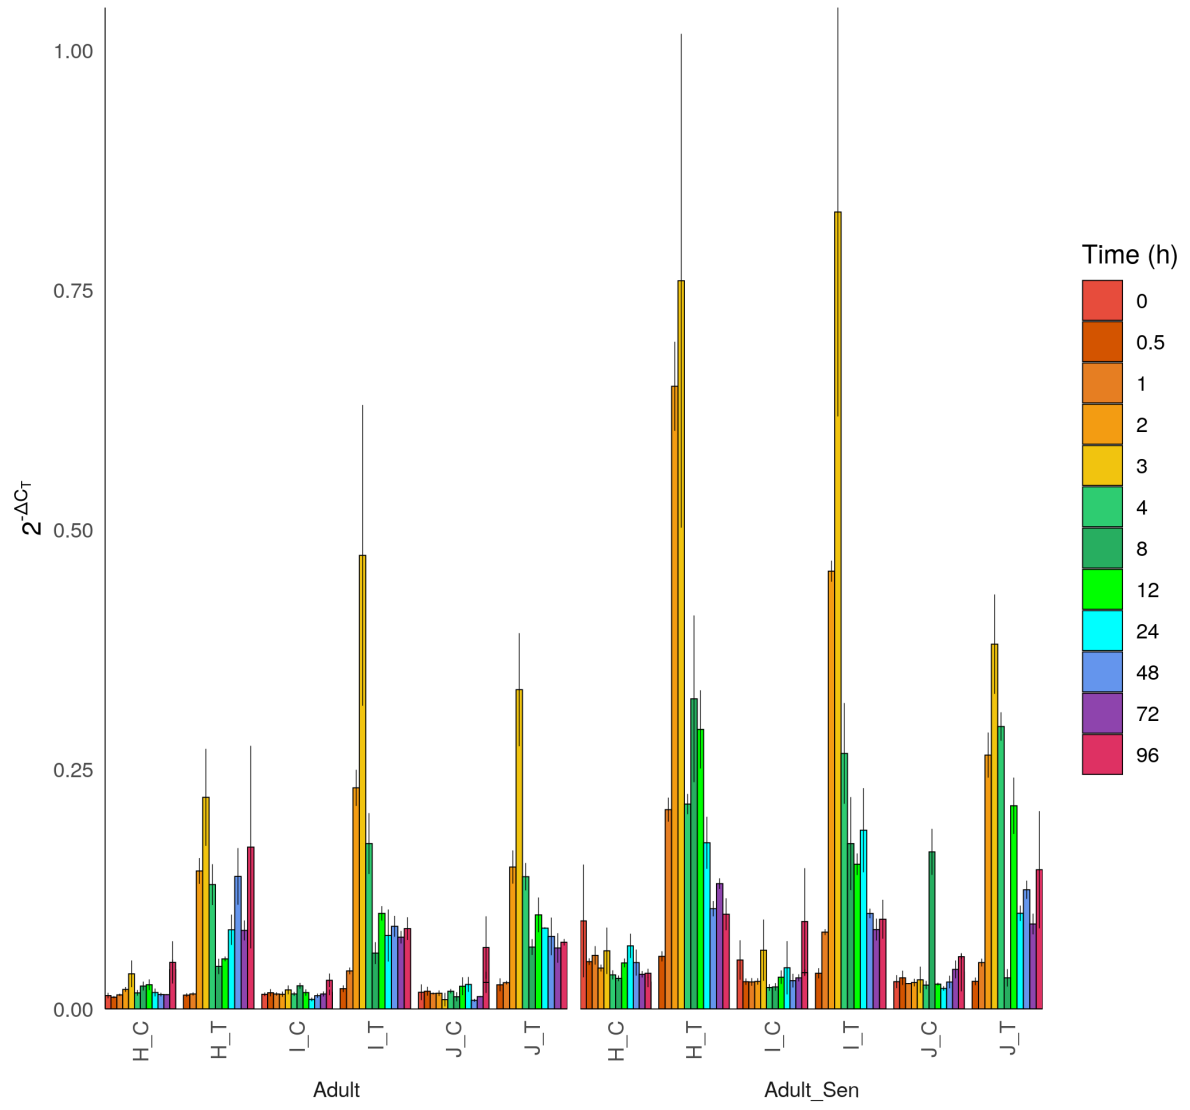

# LARP6

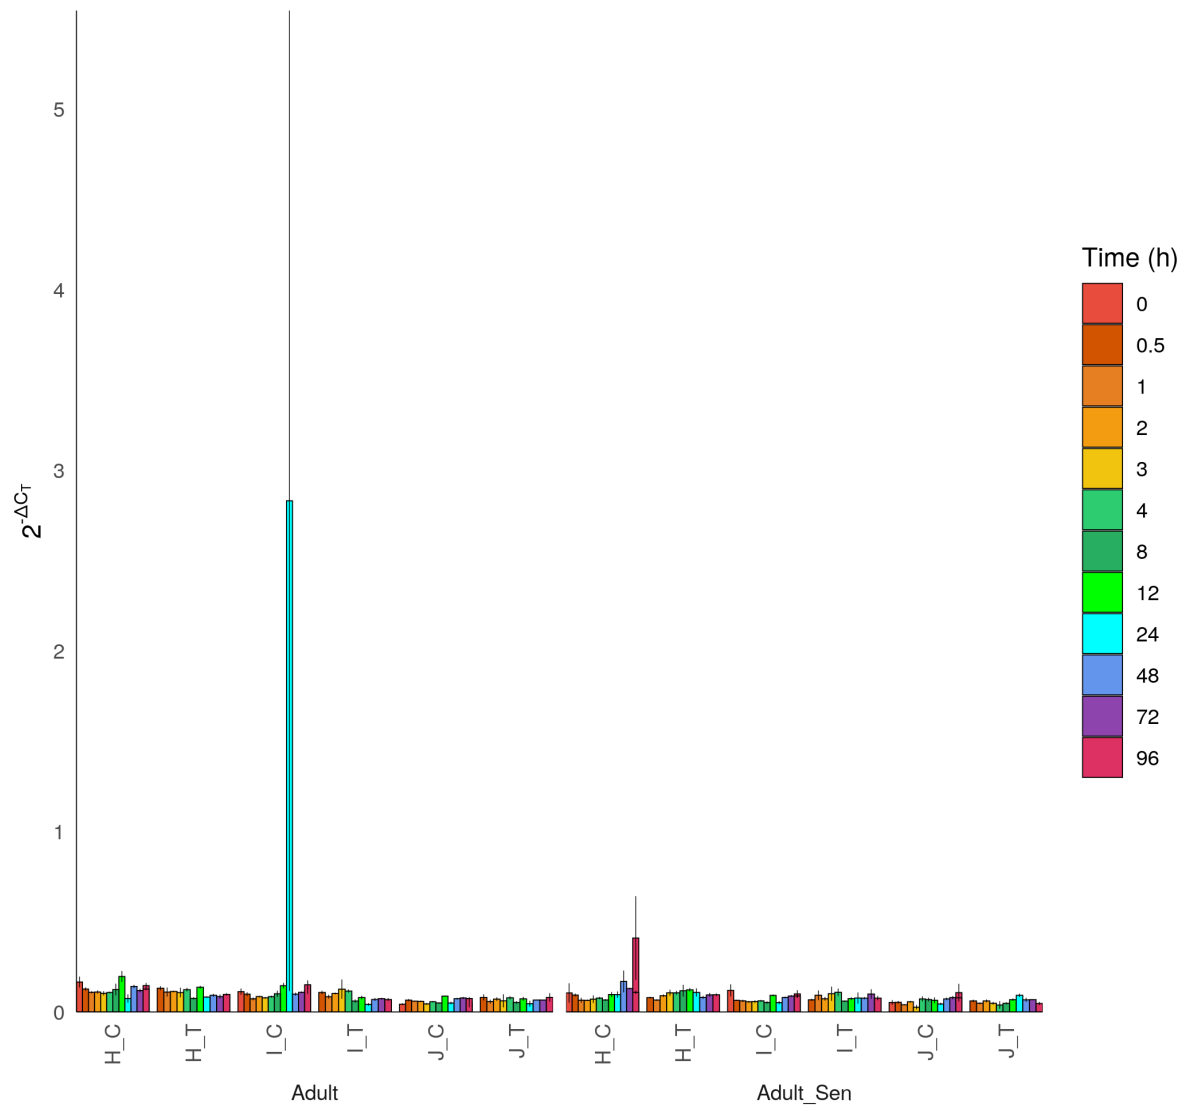

# LOXL1

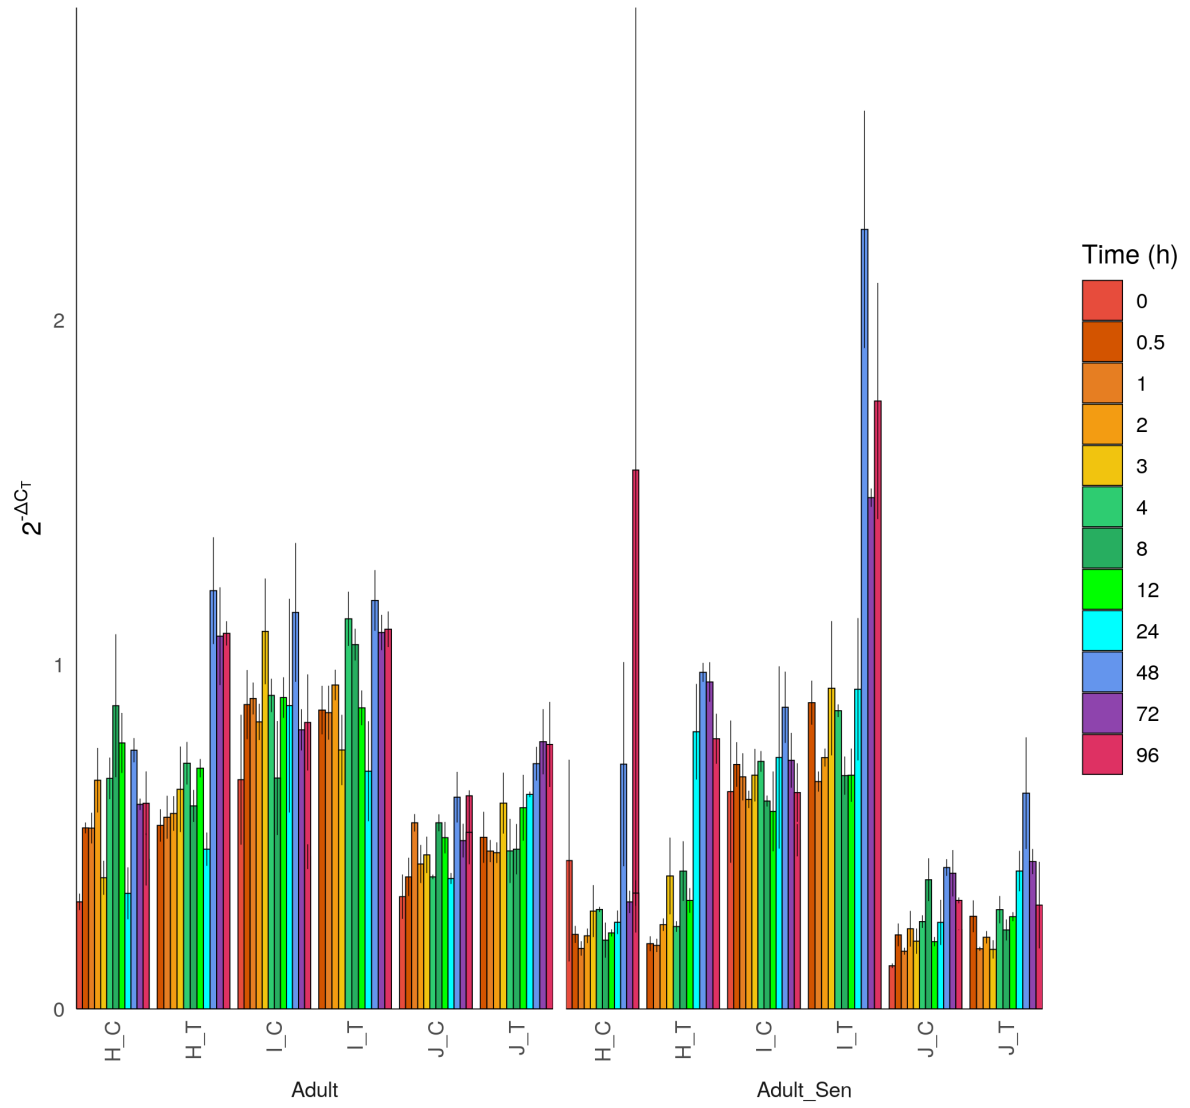



LOXL2

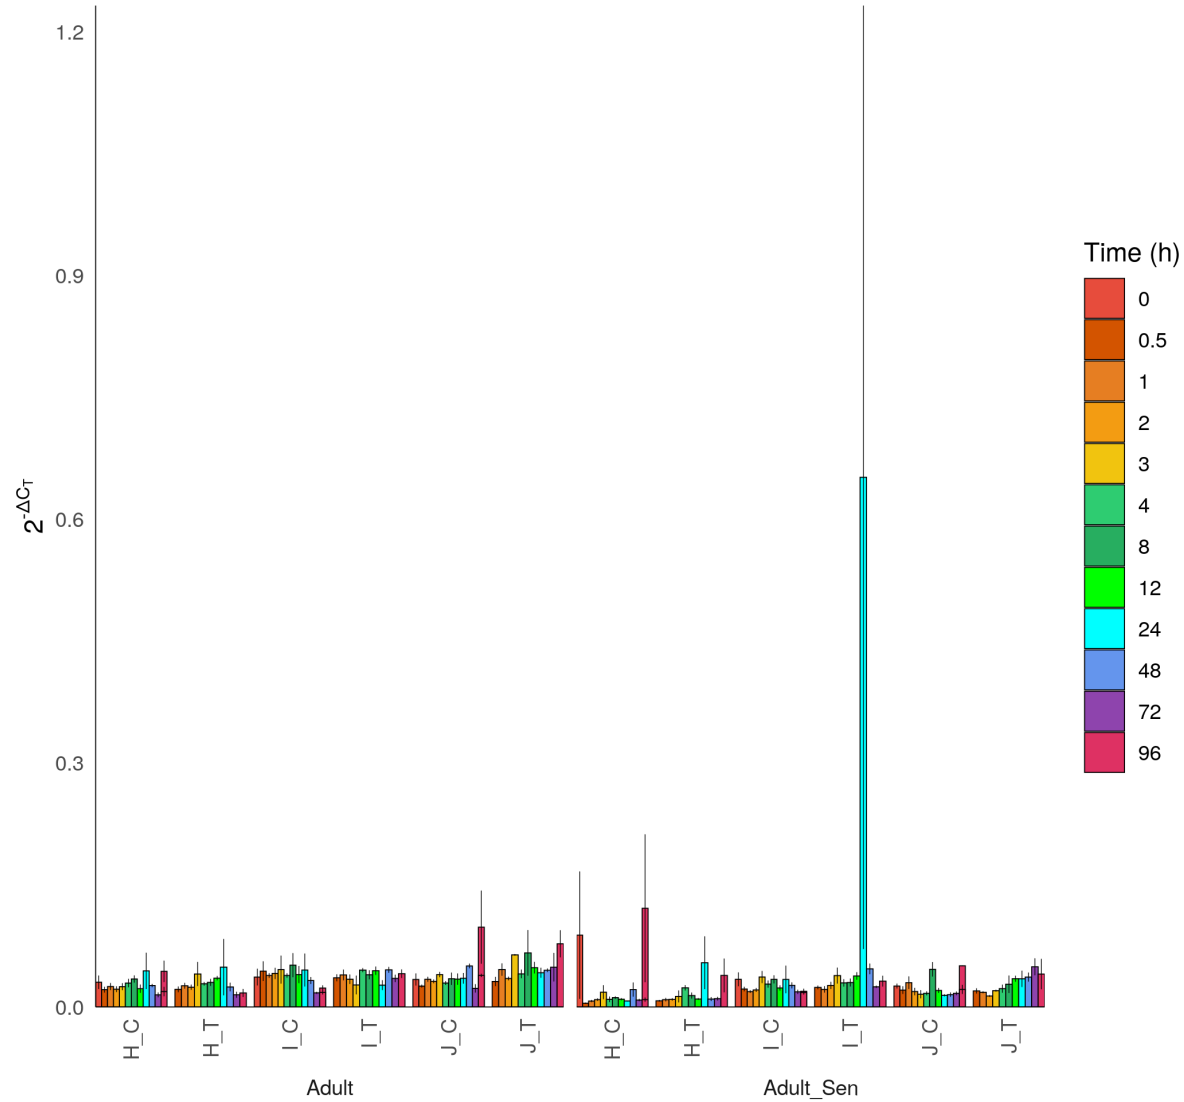

LTBP2

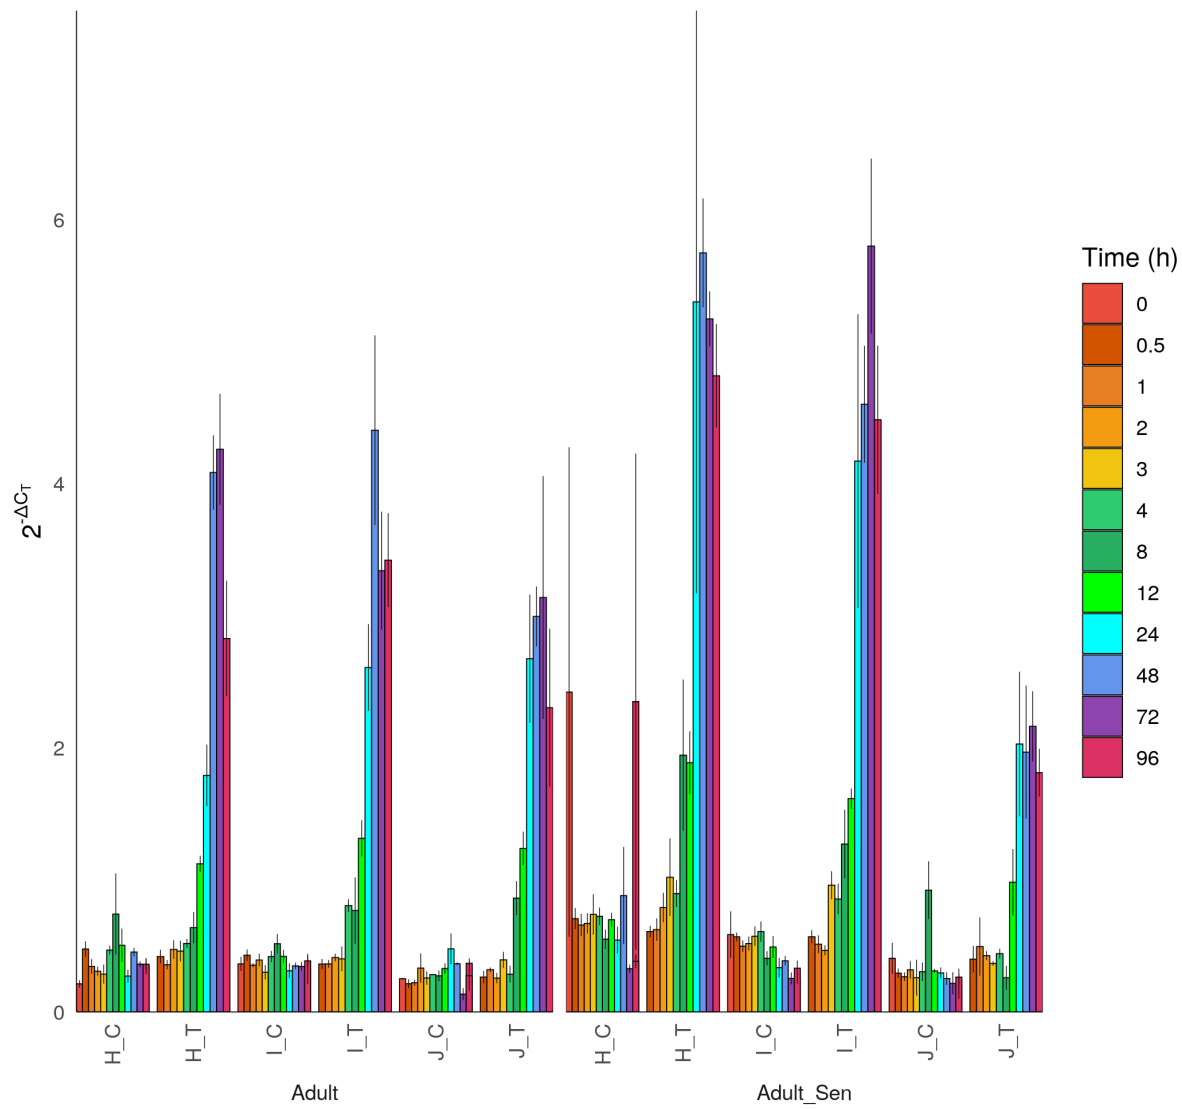

MMP1

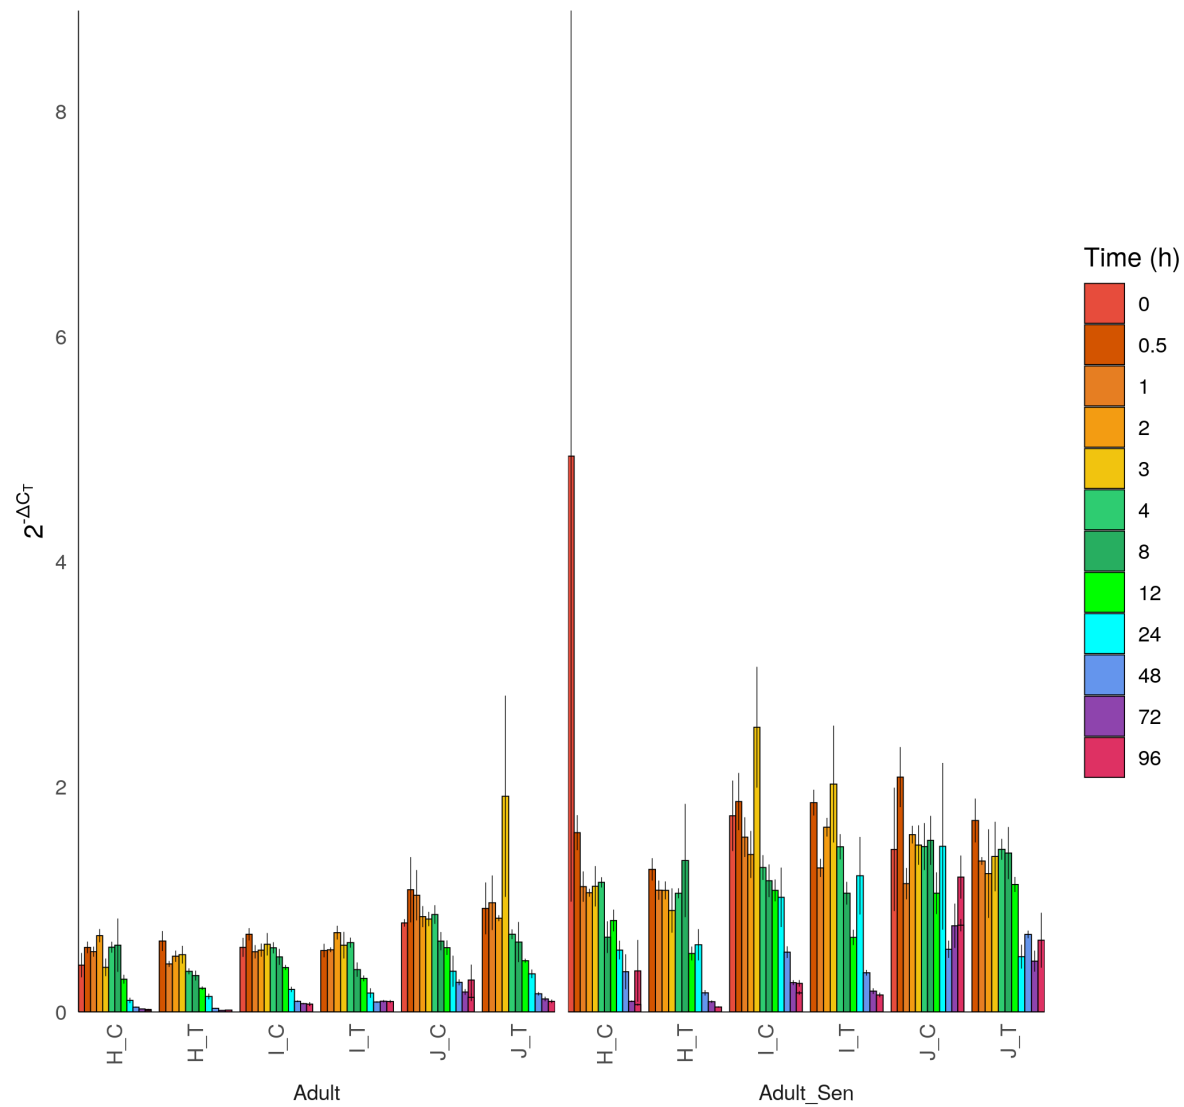

MMP2

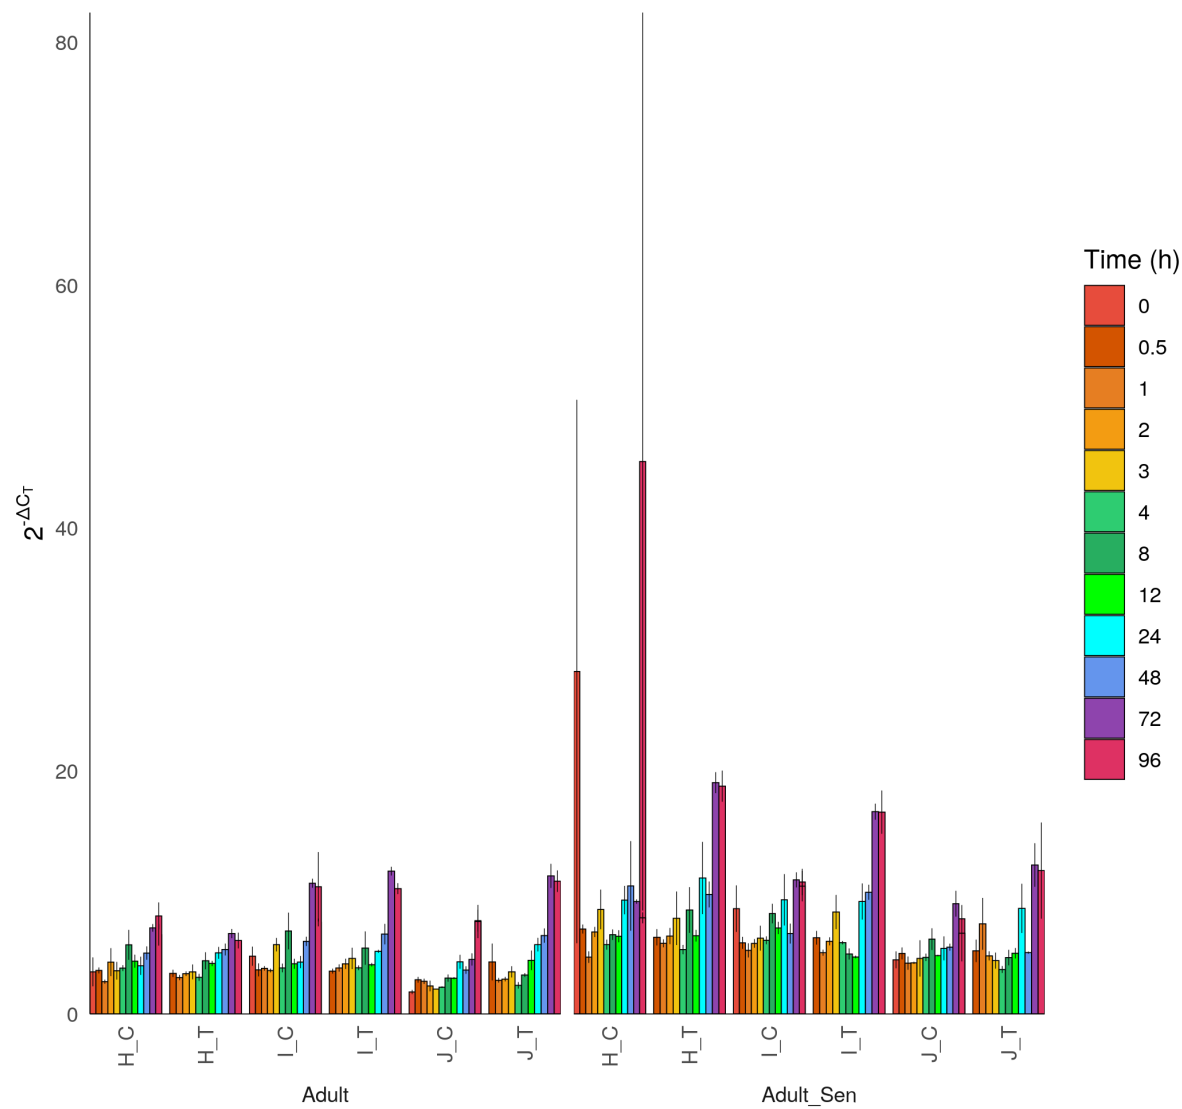

# MMP14

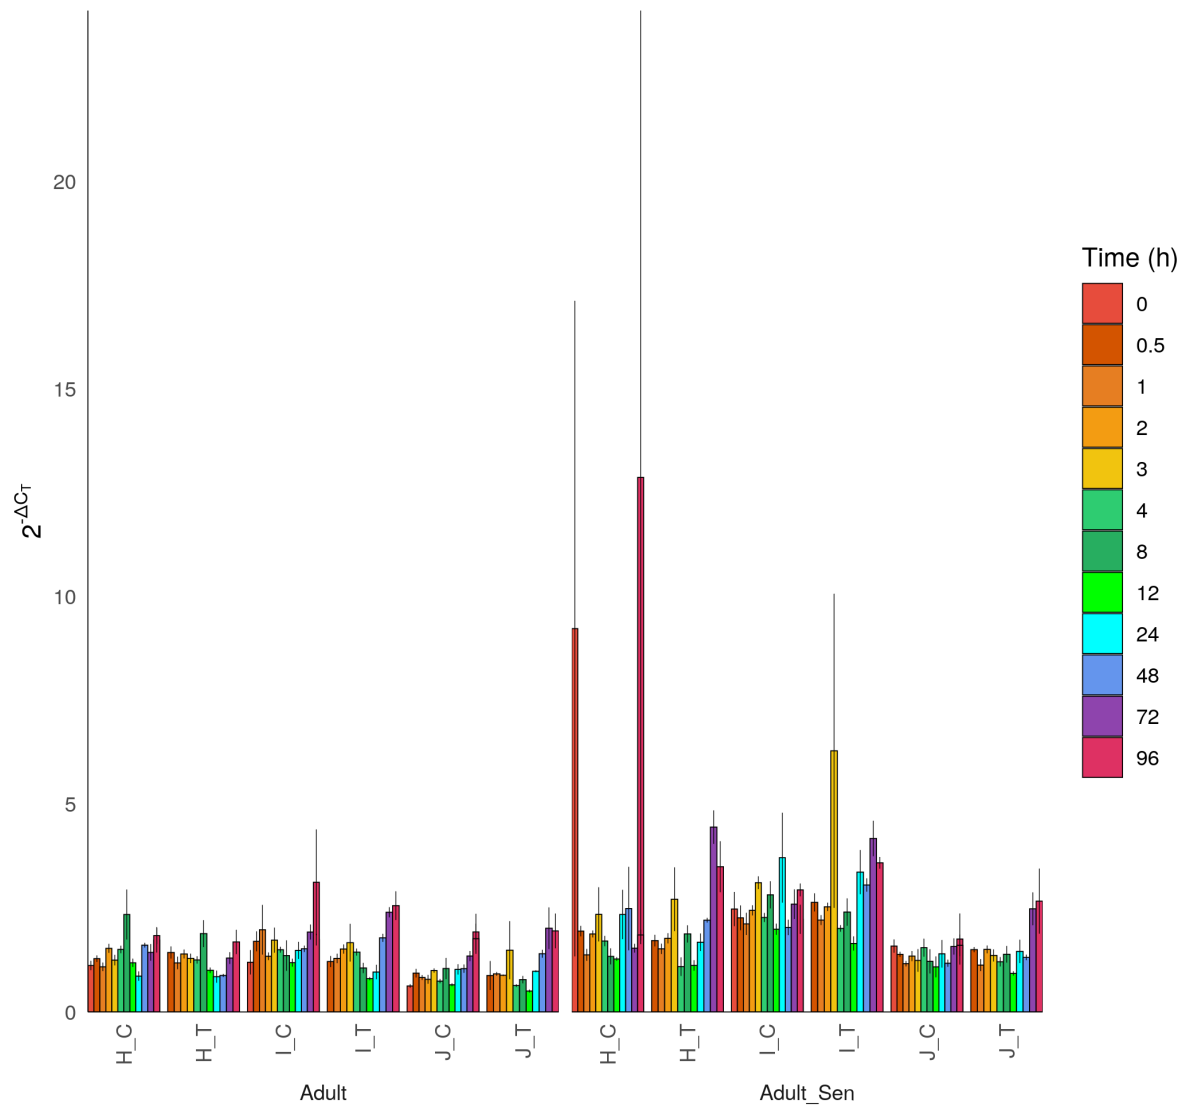

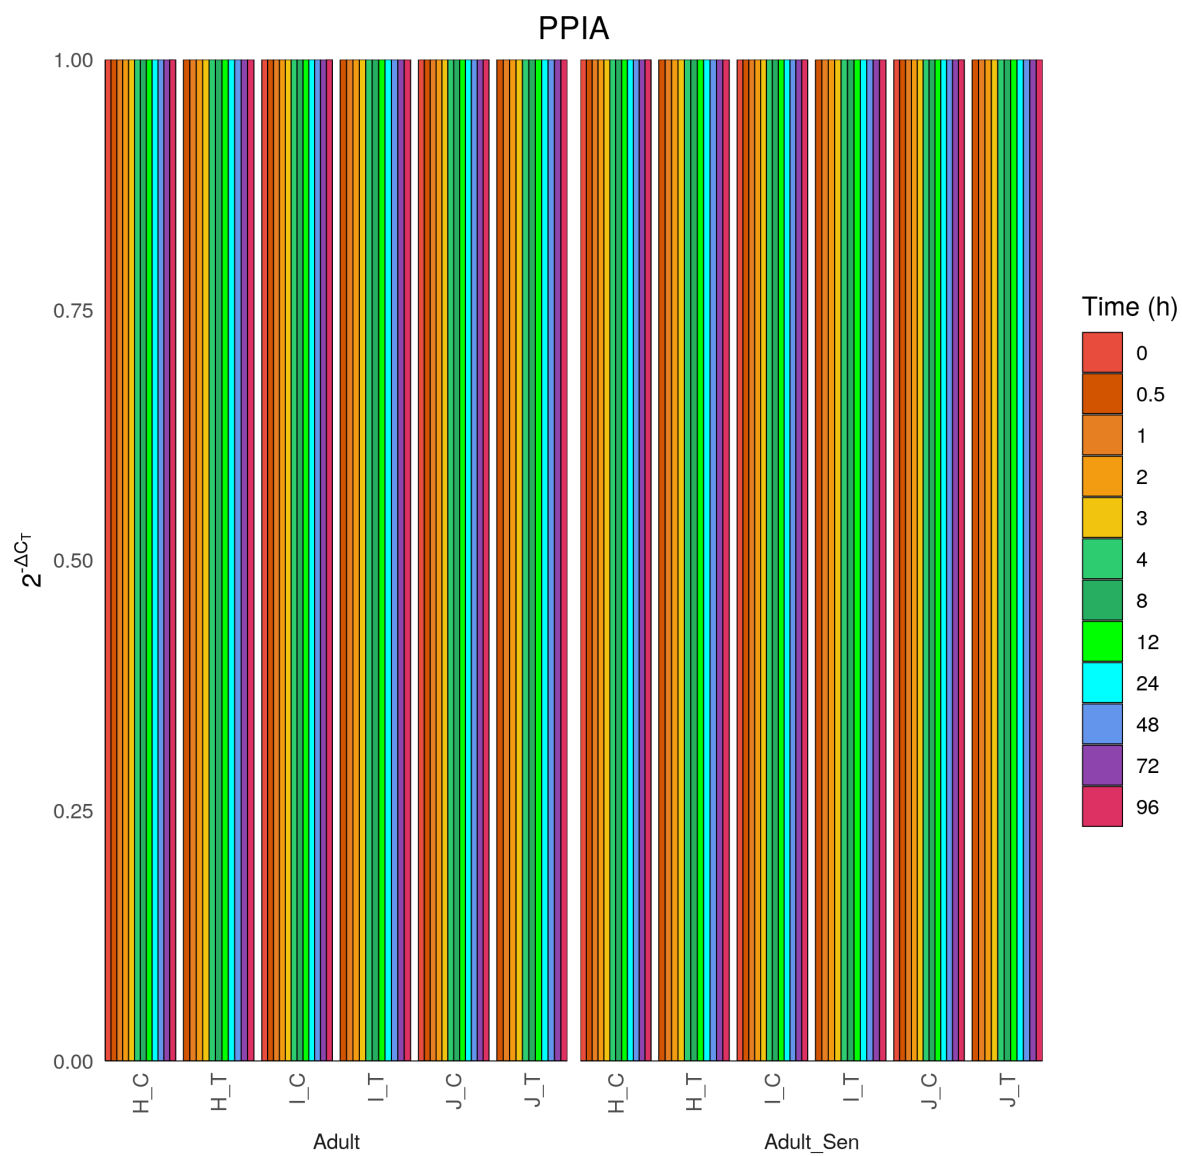

PPP3CA

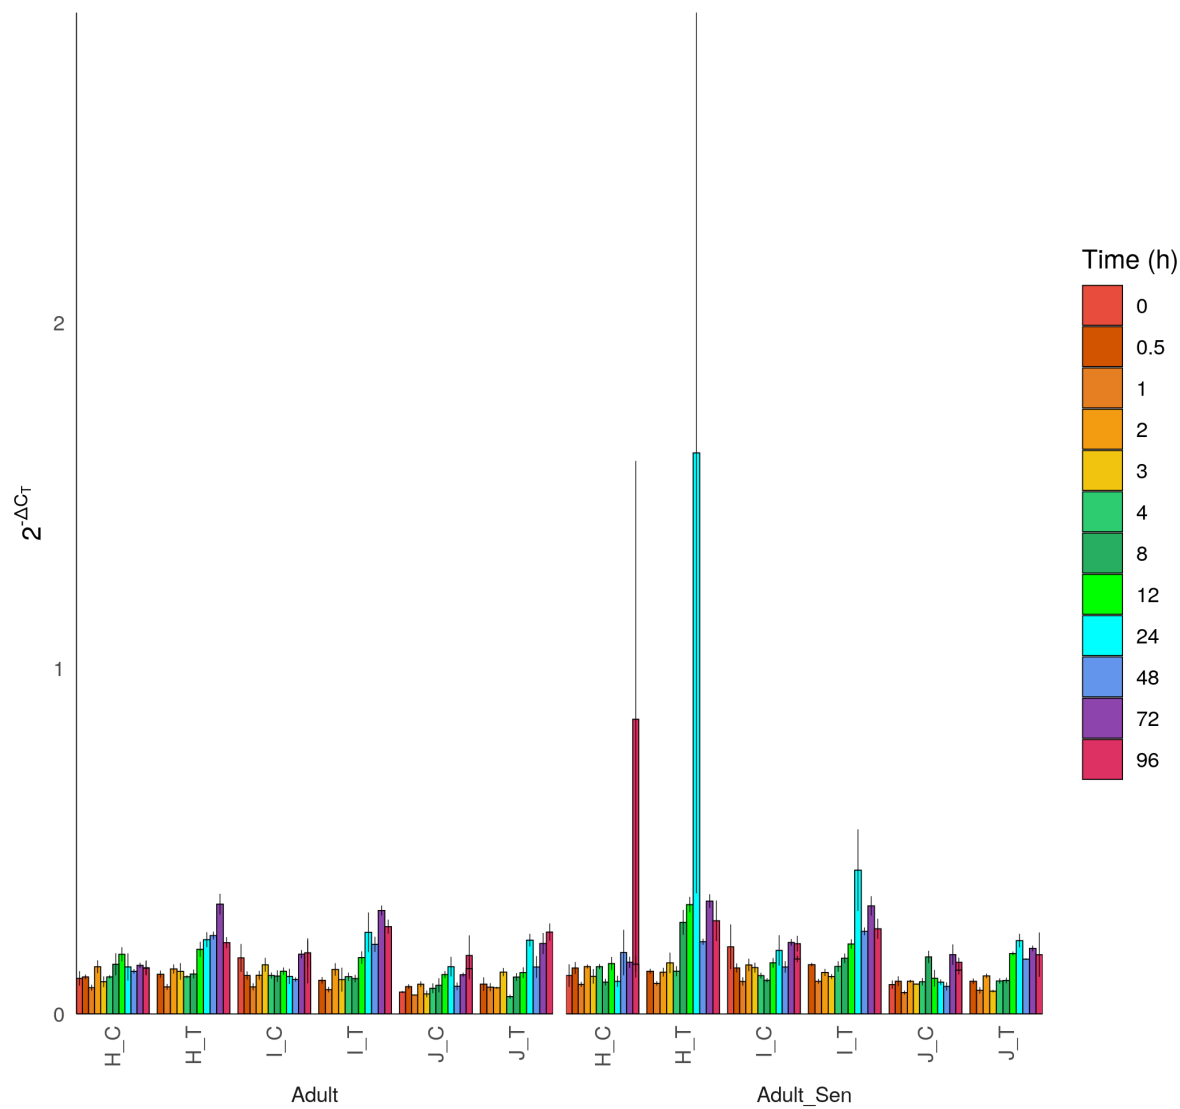

# PSMD14

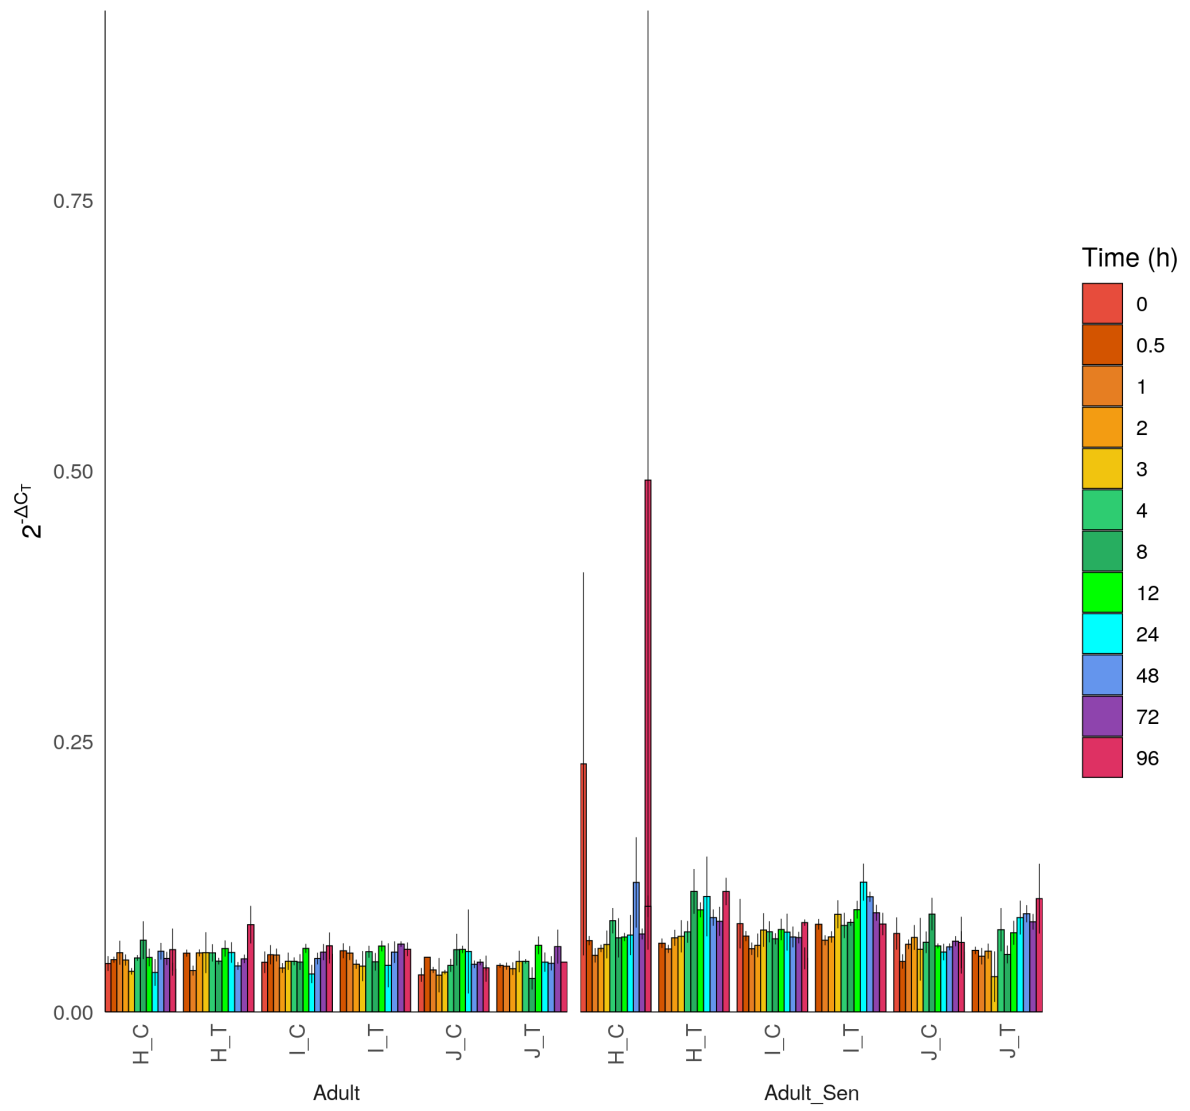



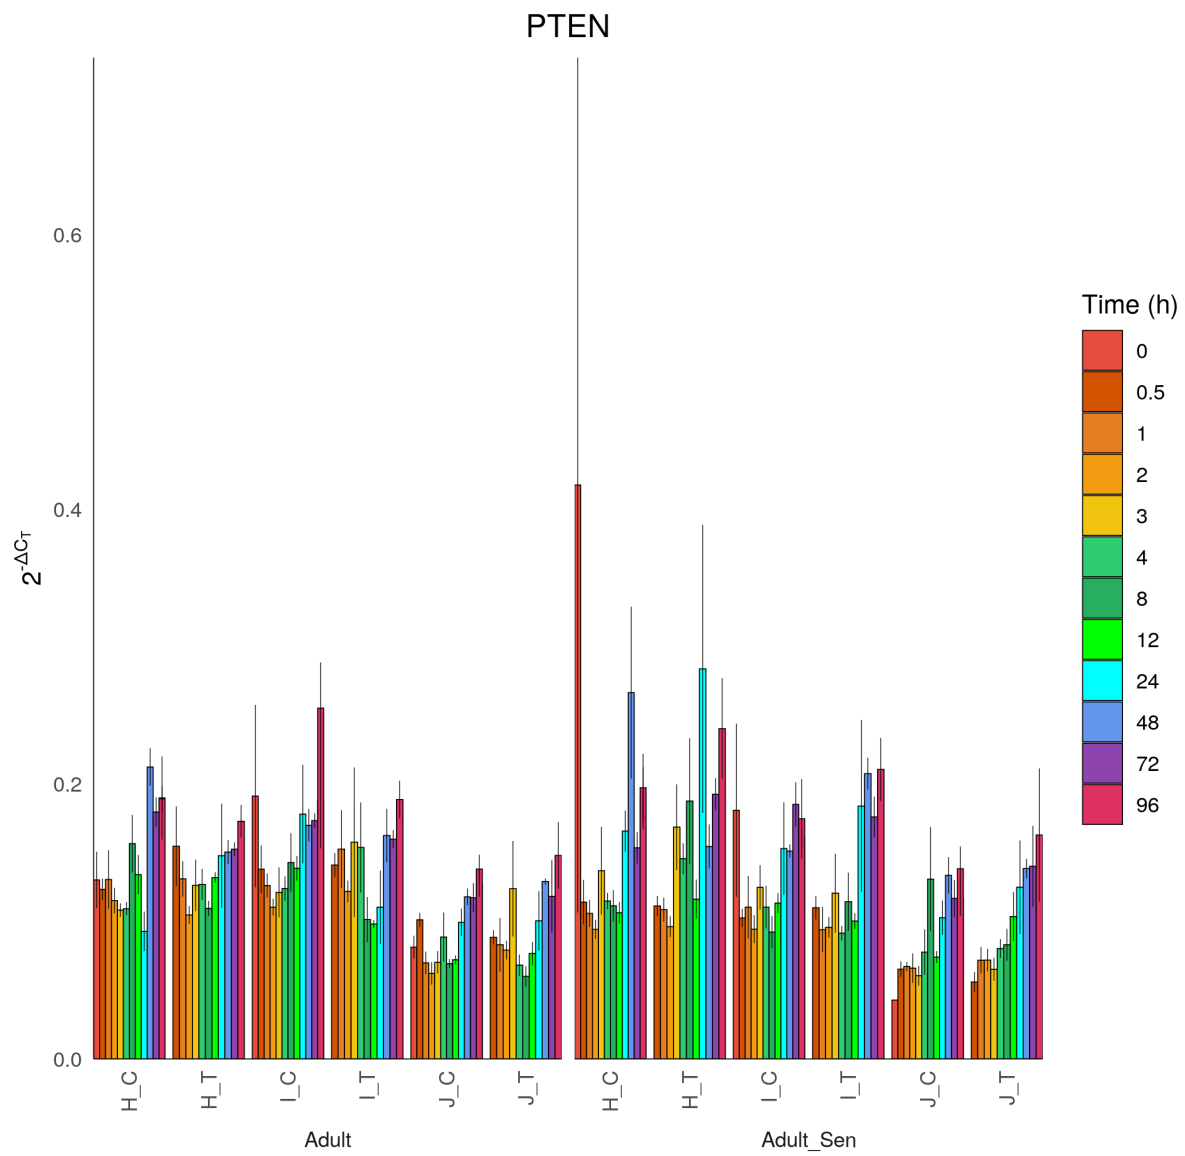

RARA

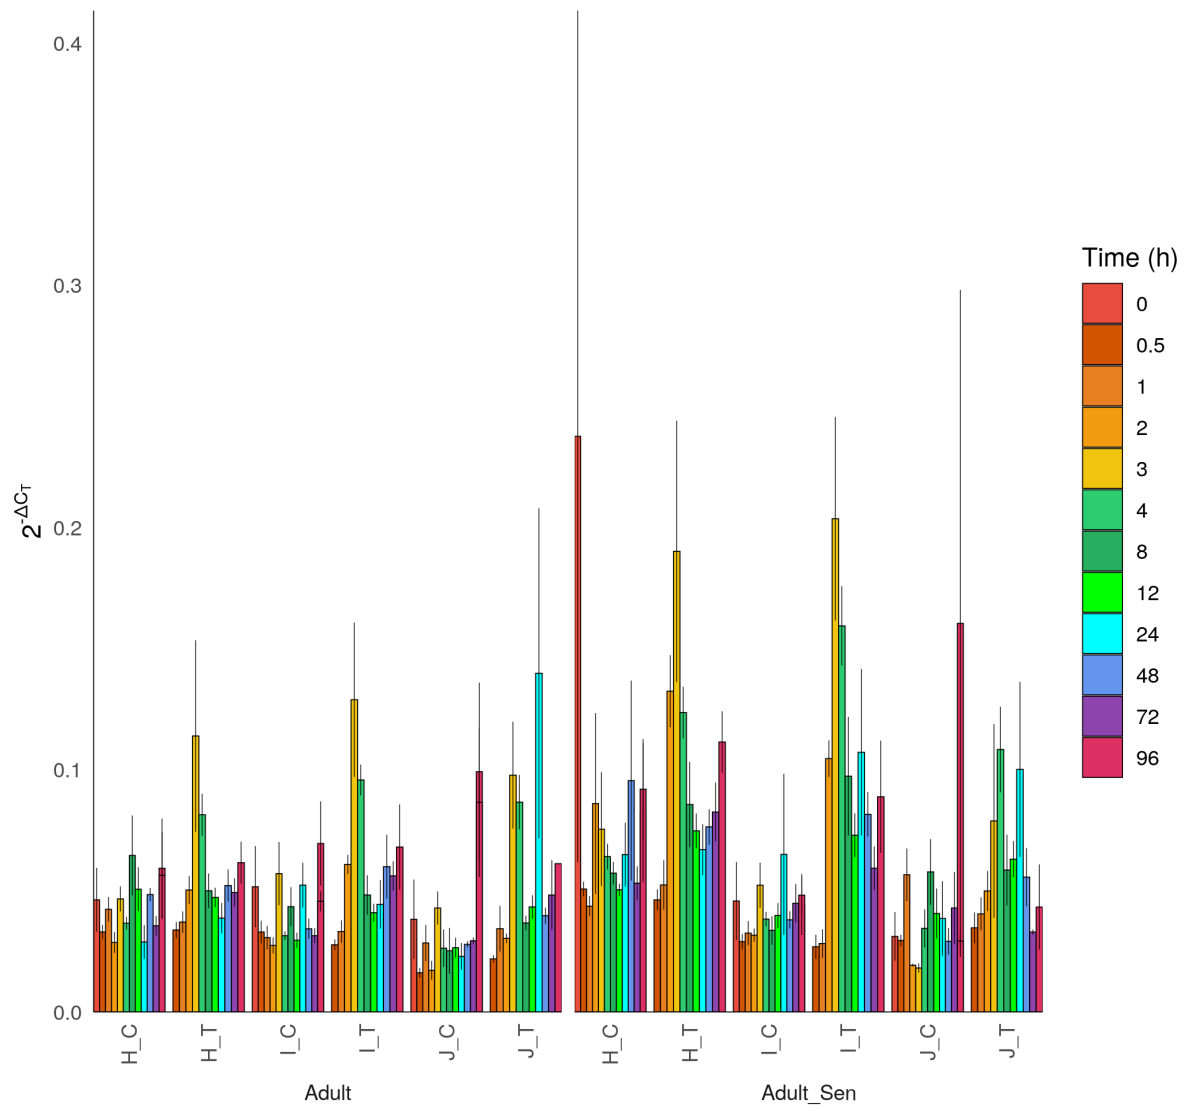

# RARG

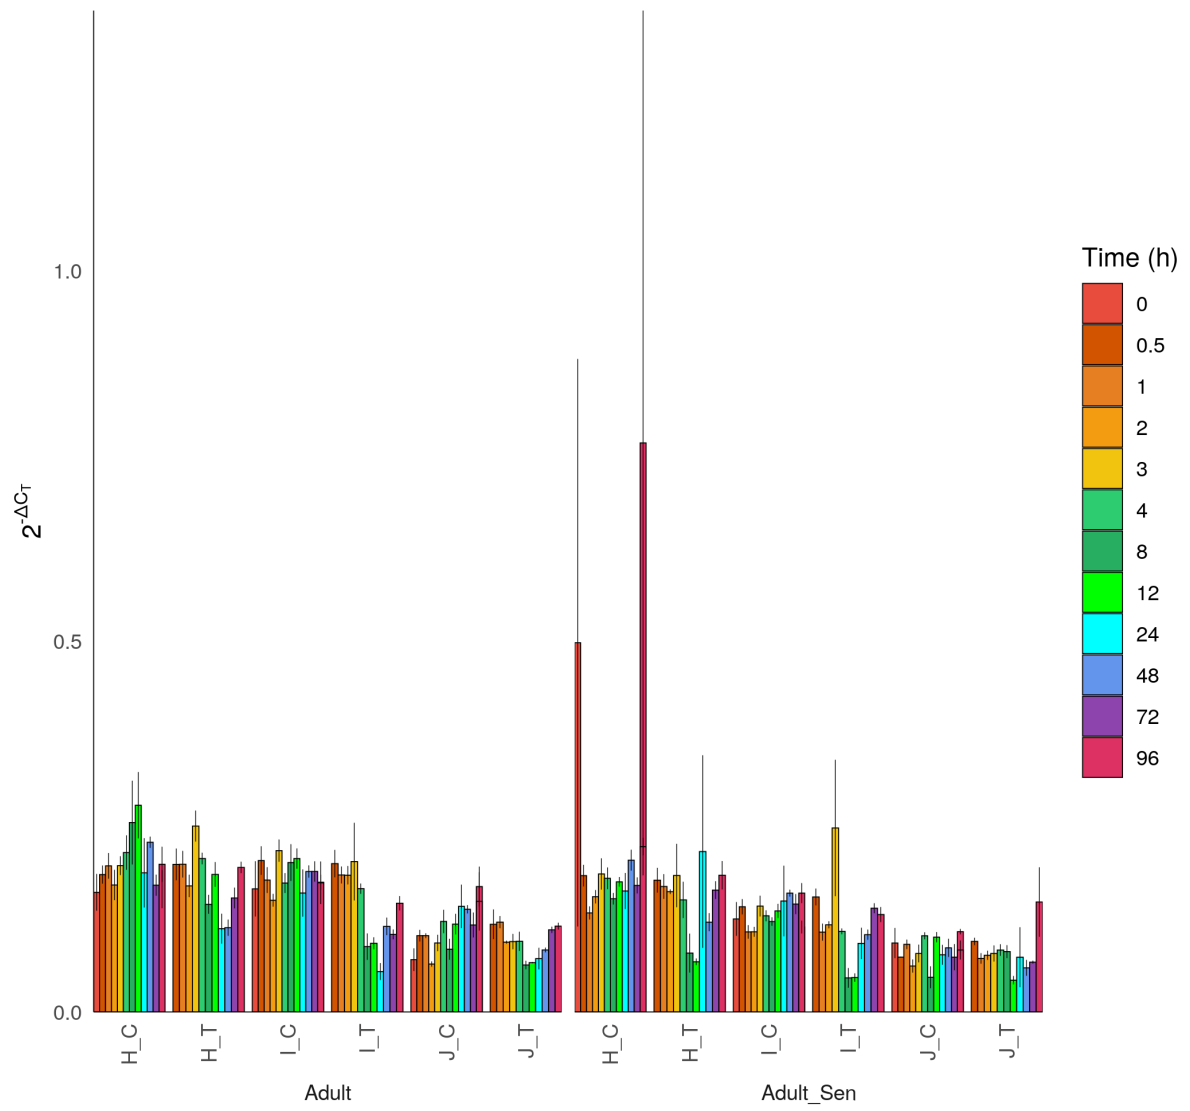

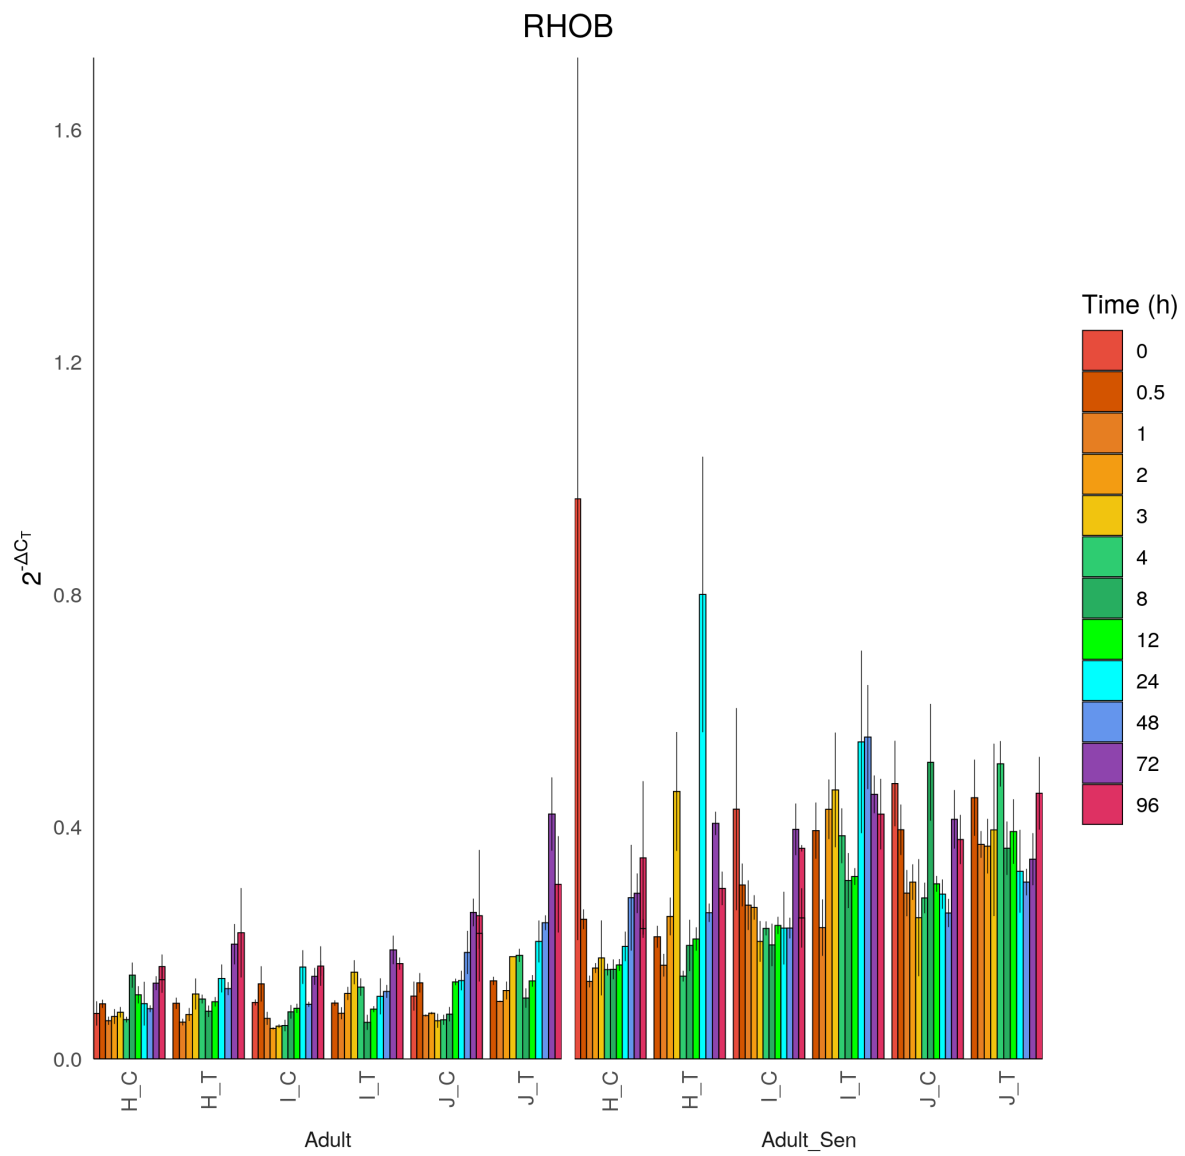

SERPINE1

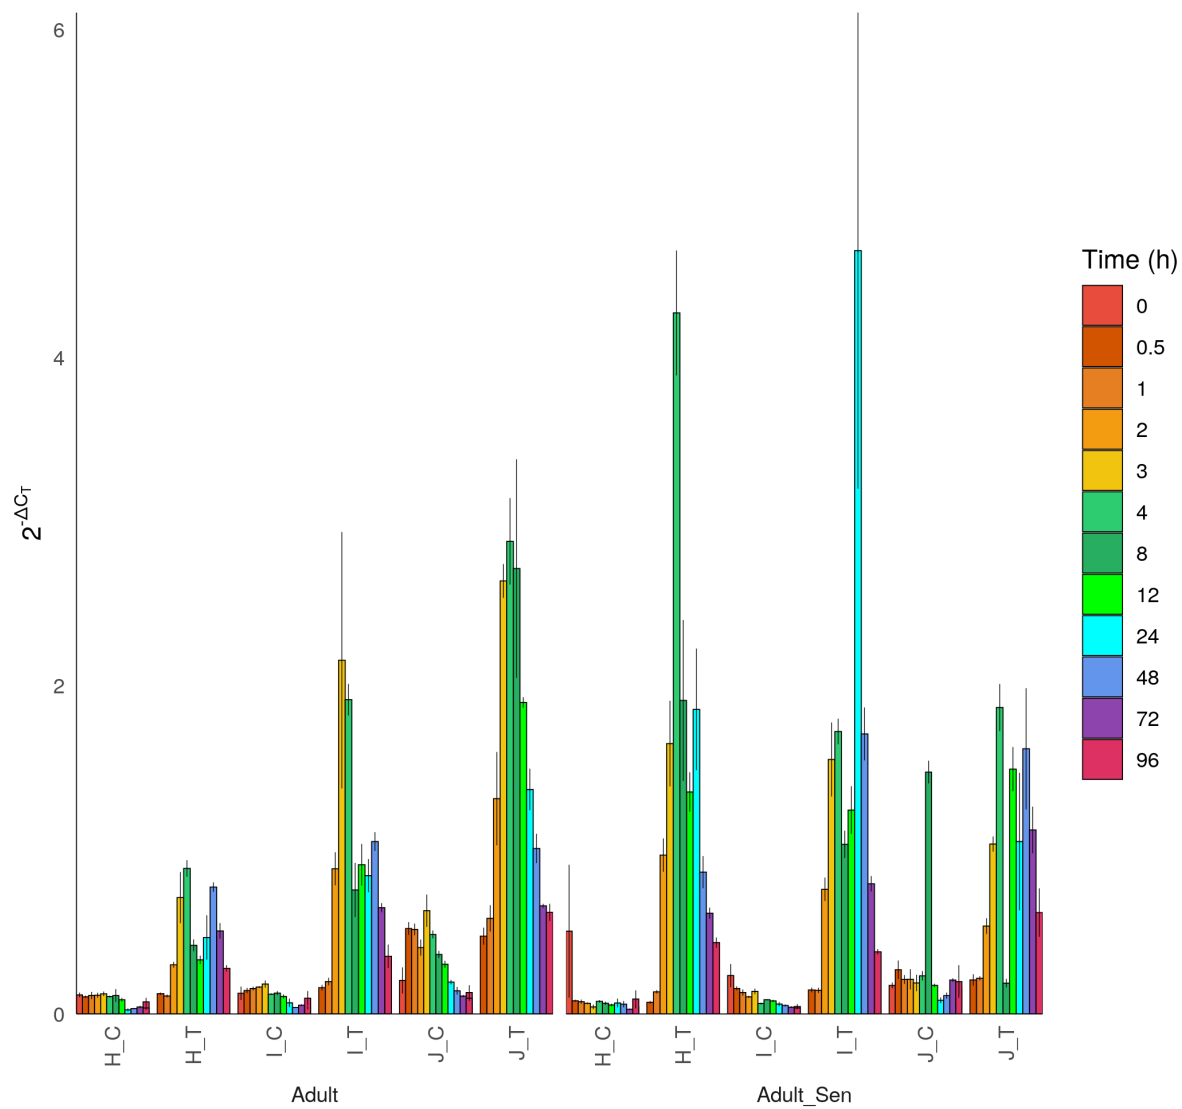

# SERPINE2

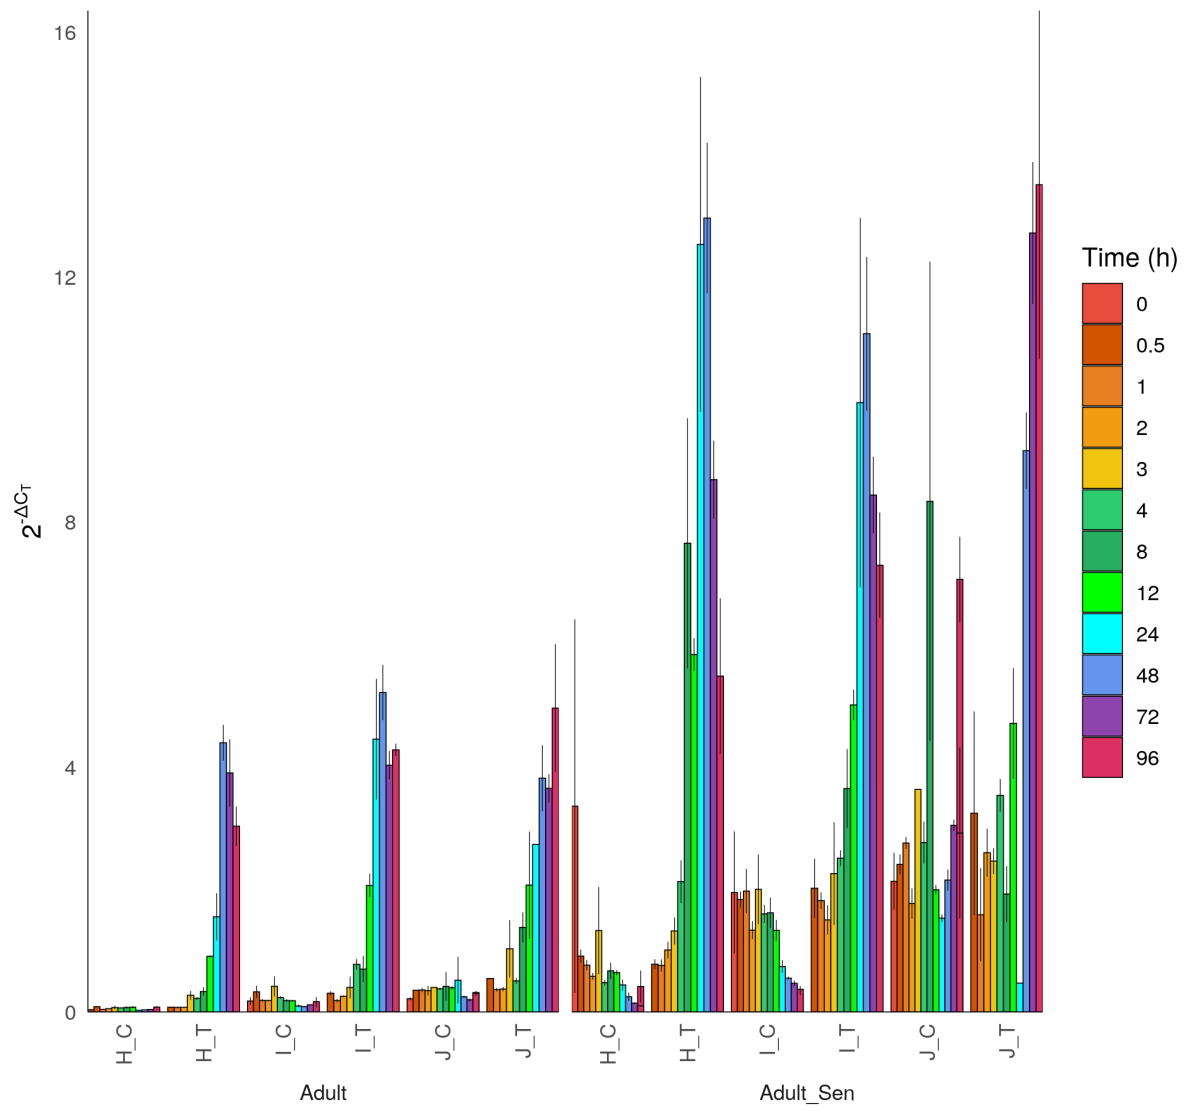

SKI

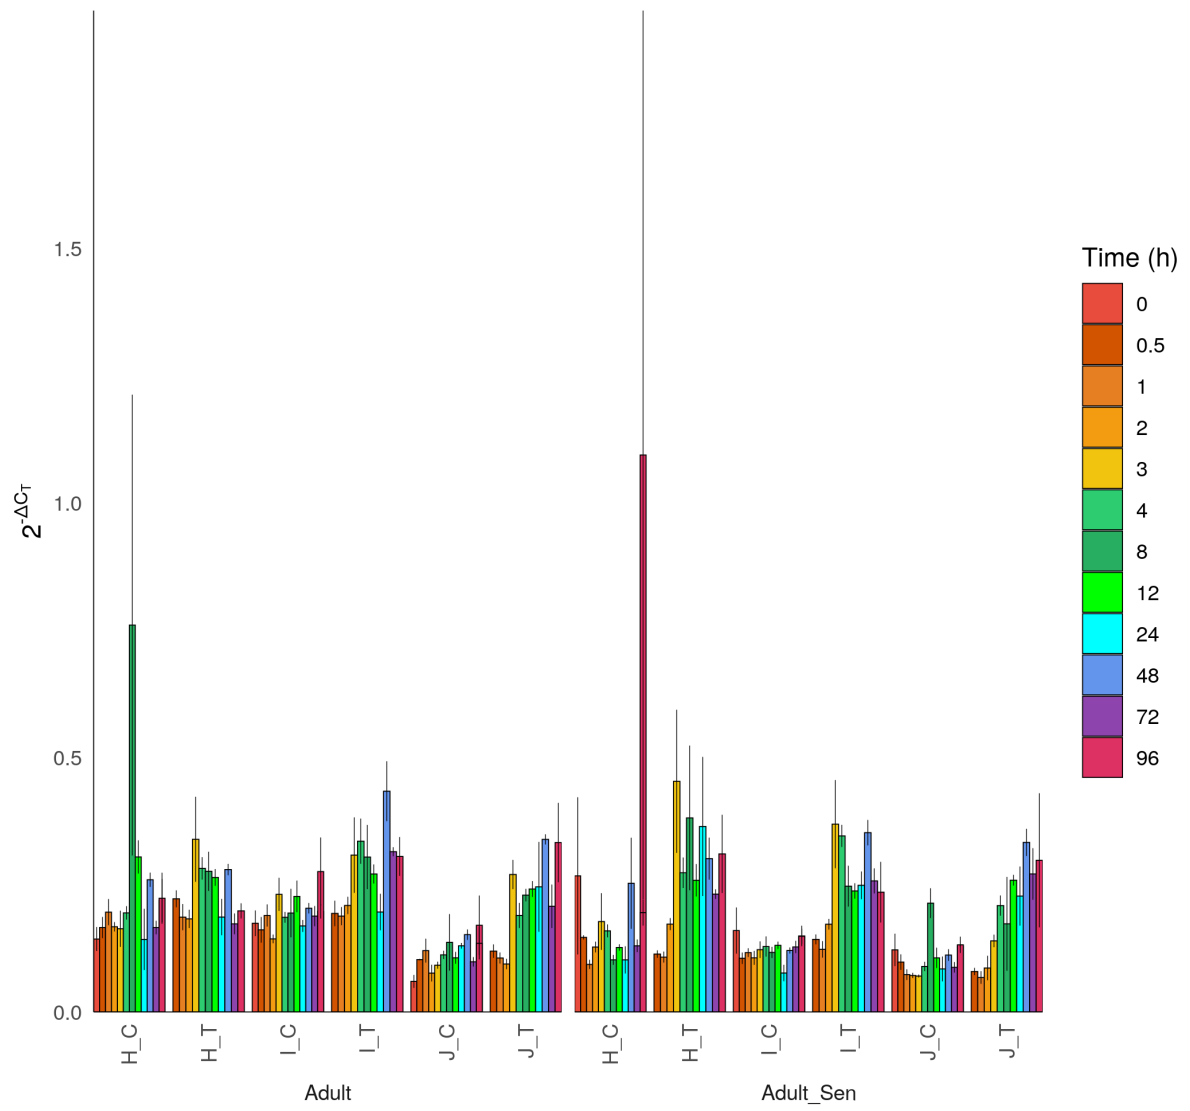

# SKIL

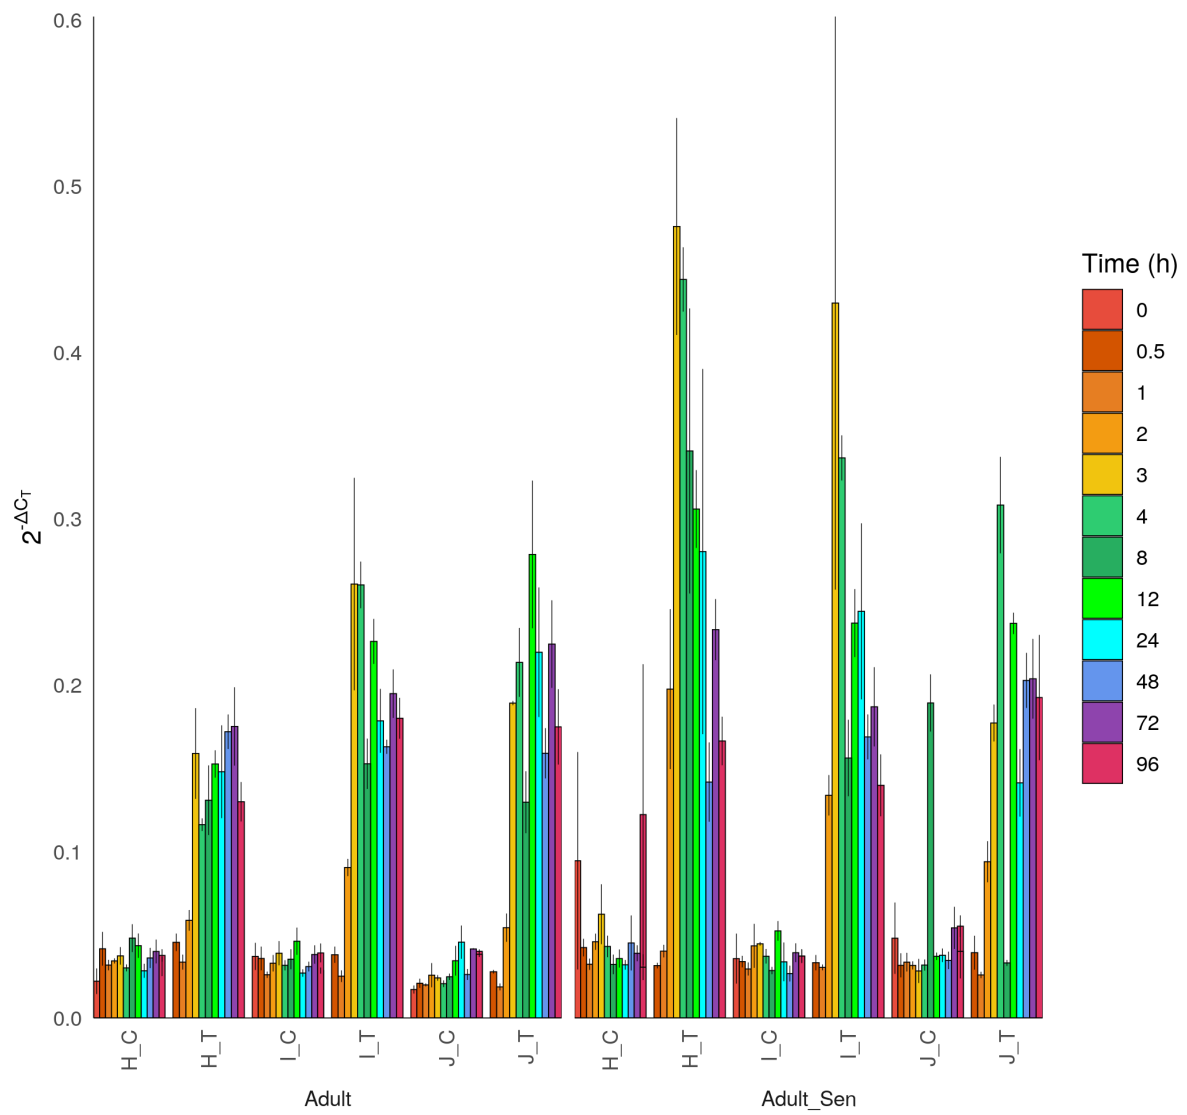



SMAD3

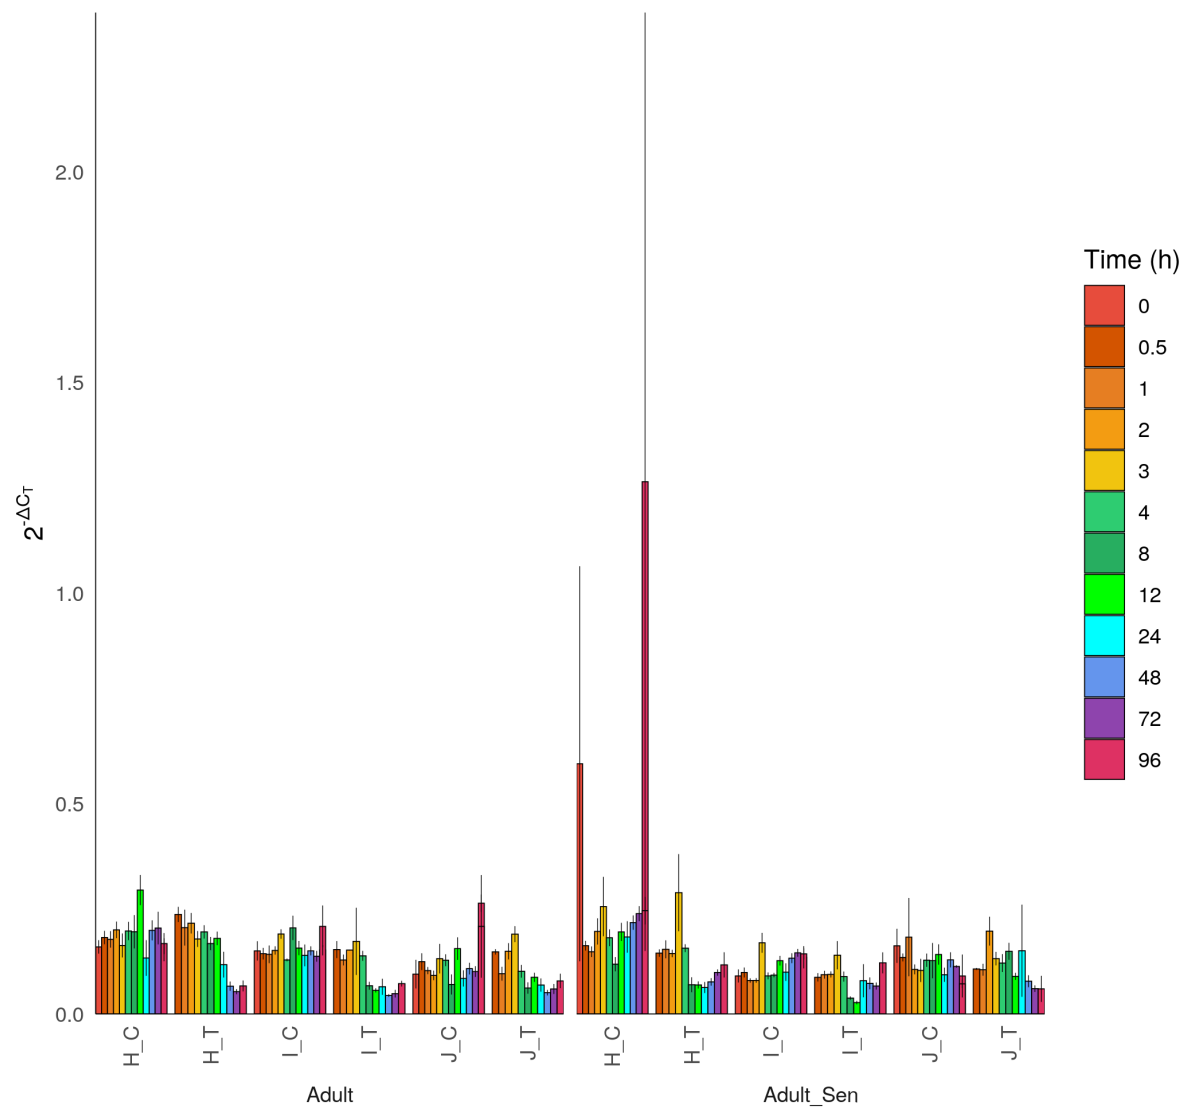

SMAD7

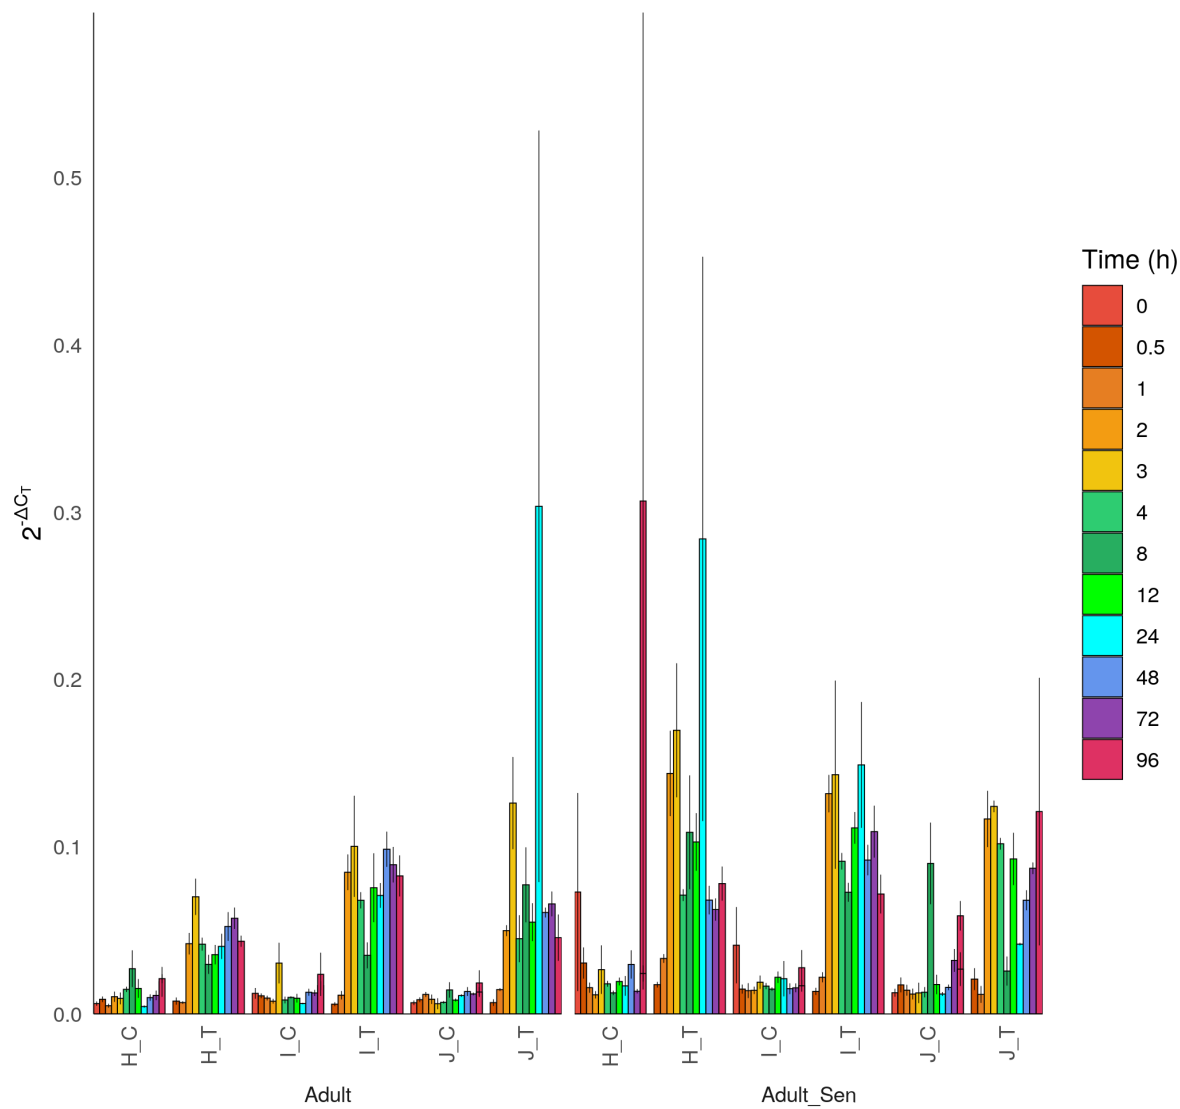

# SPARC

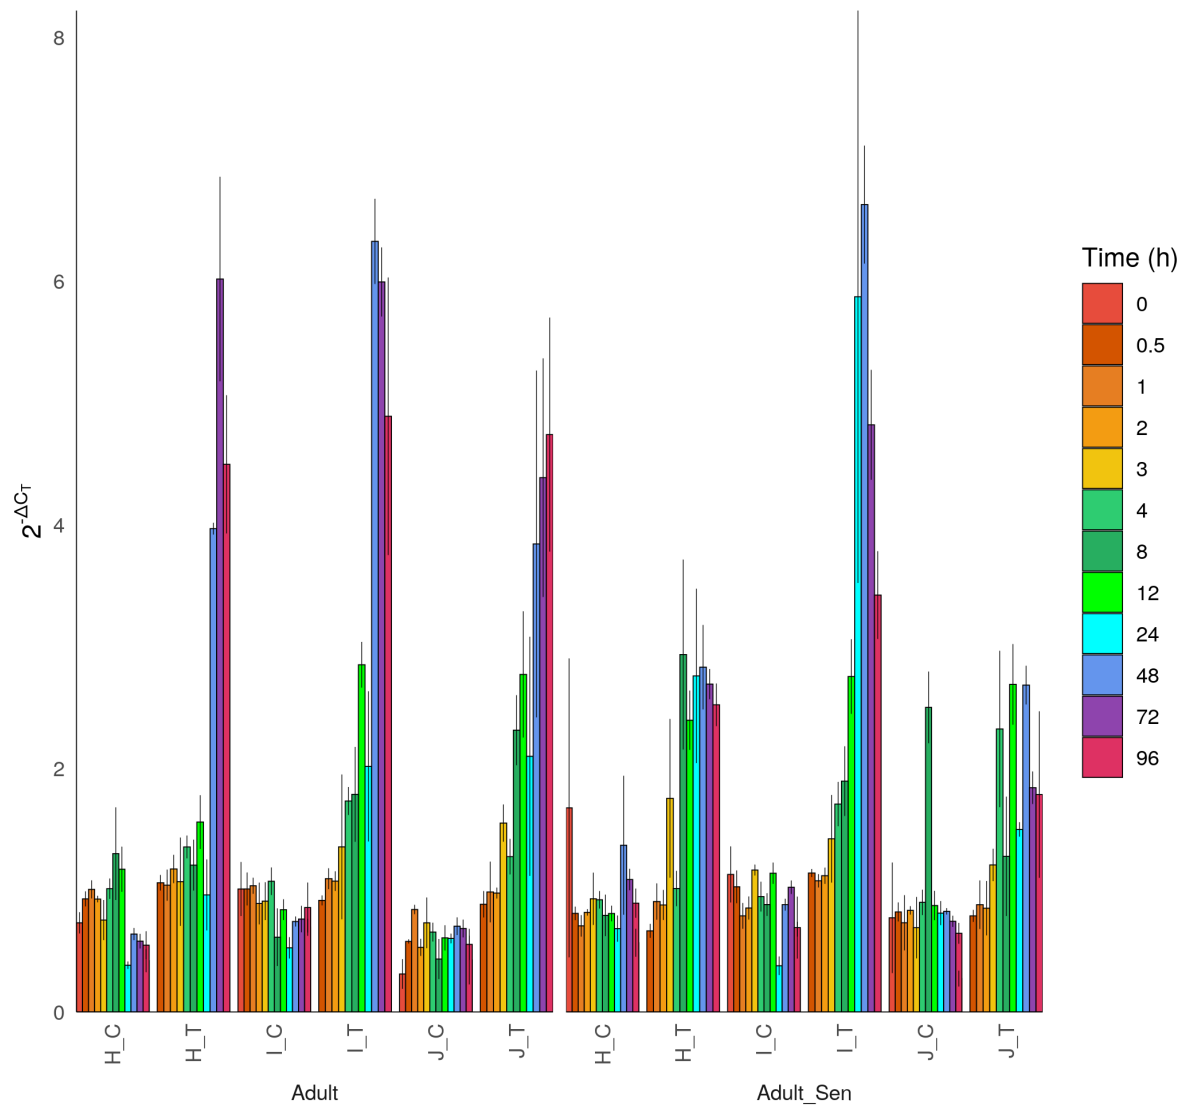

# TGFBR1

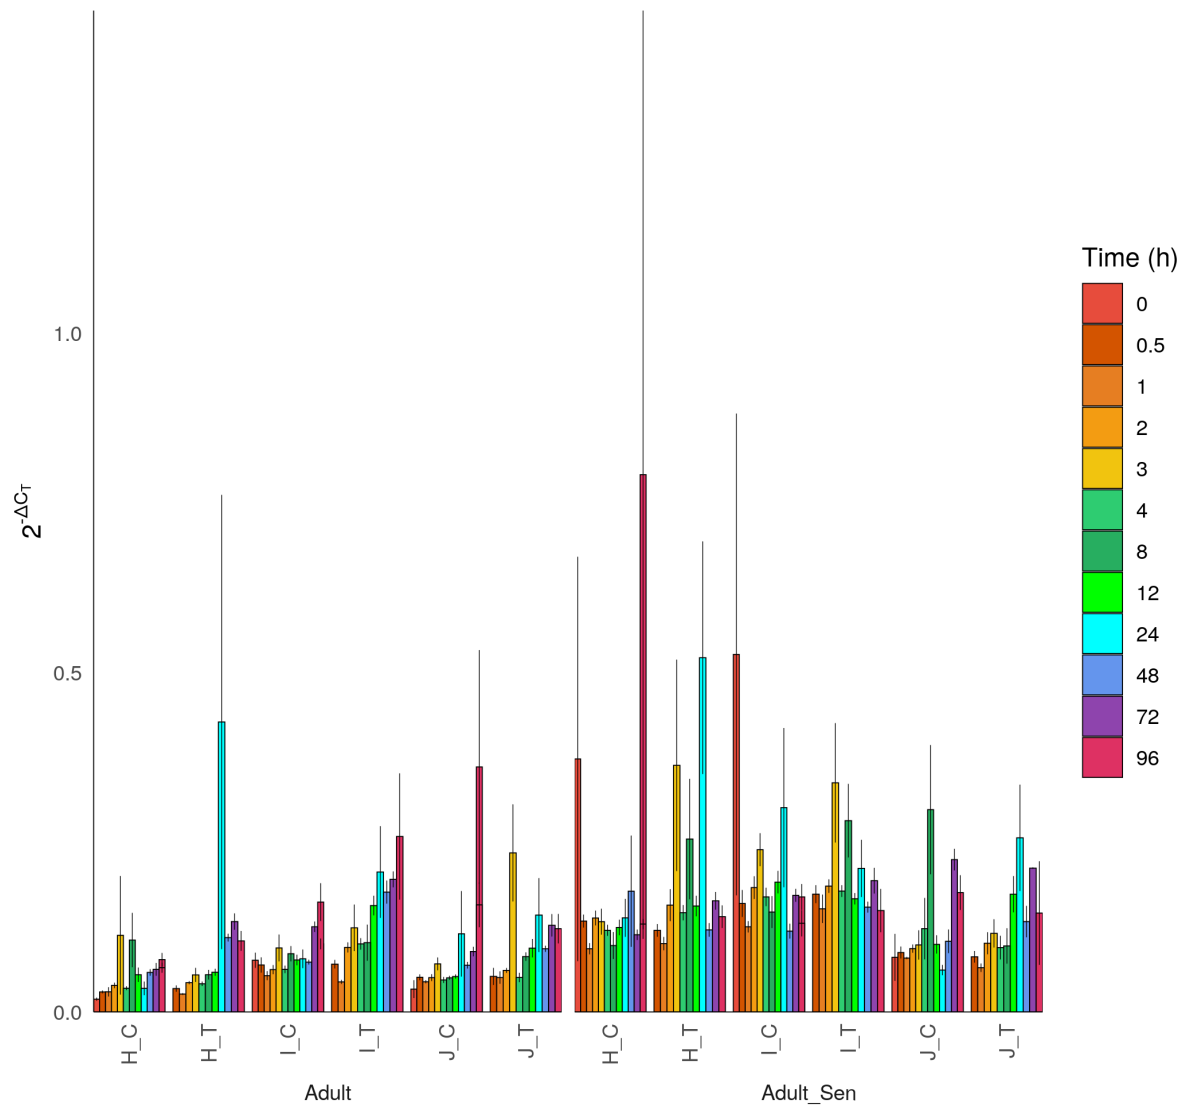

TGFBR2

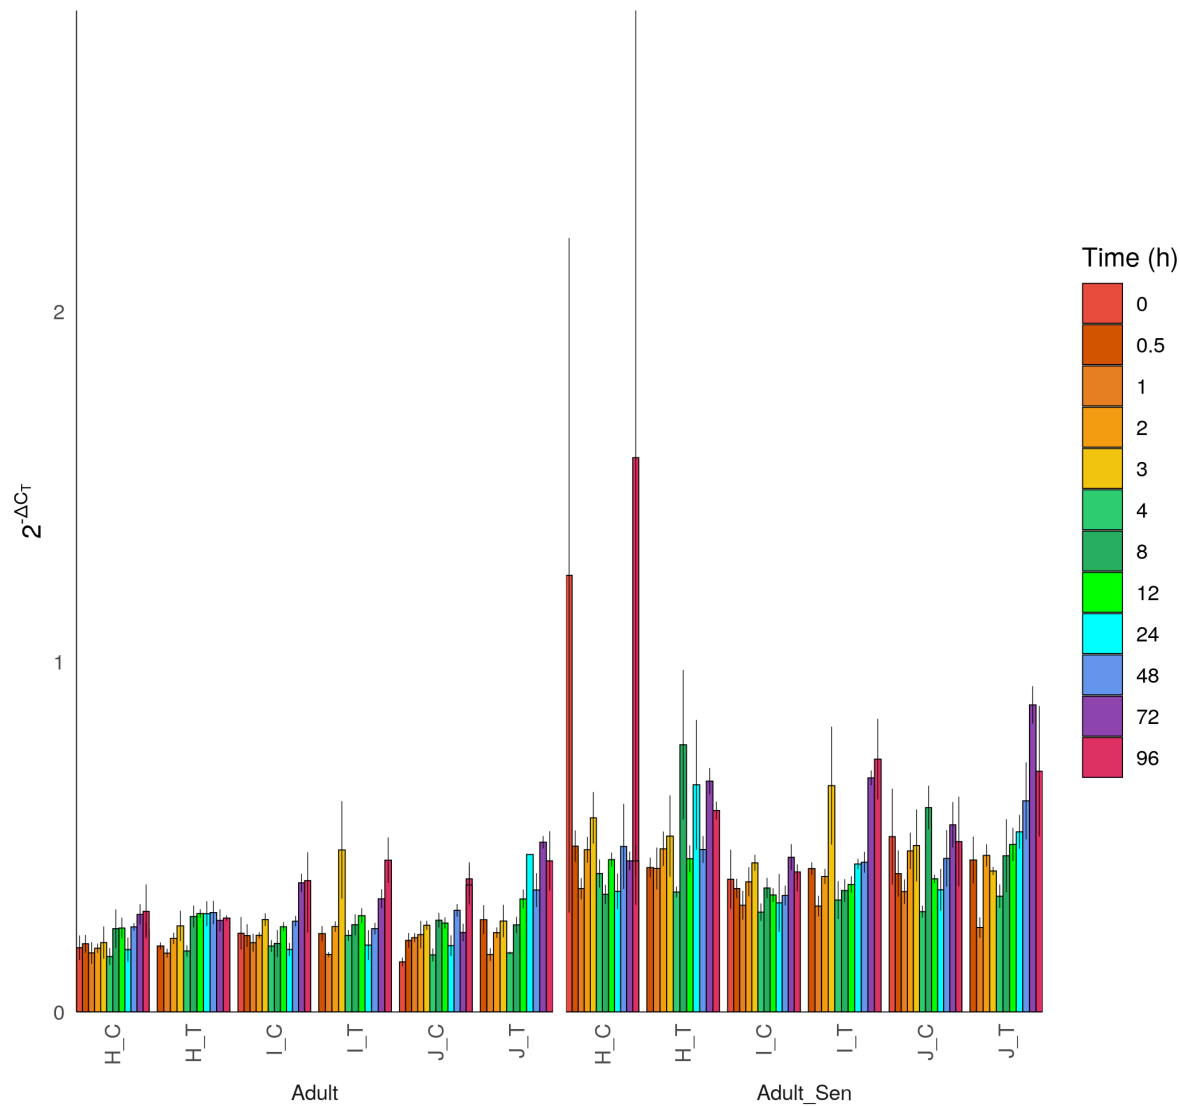

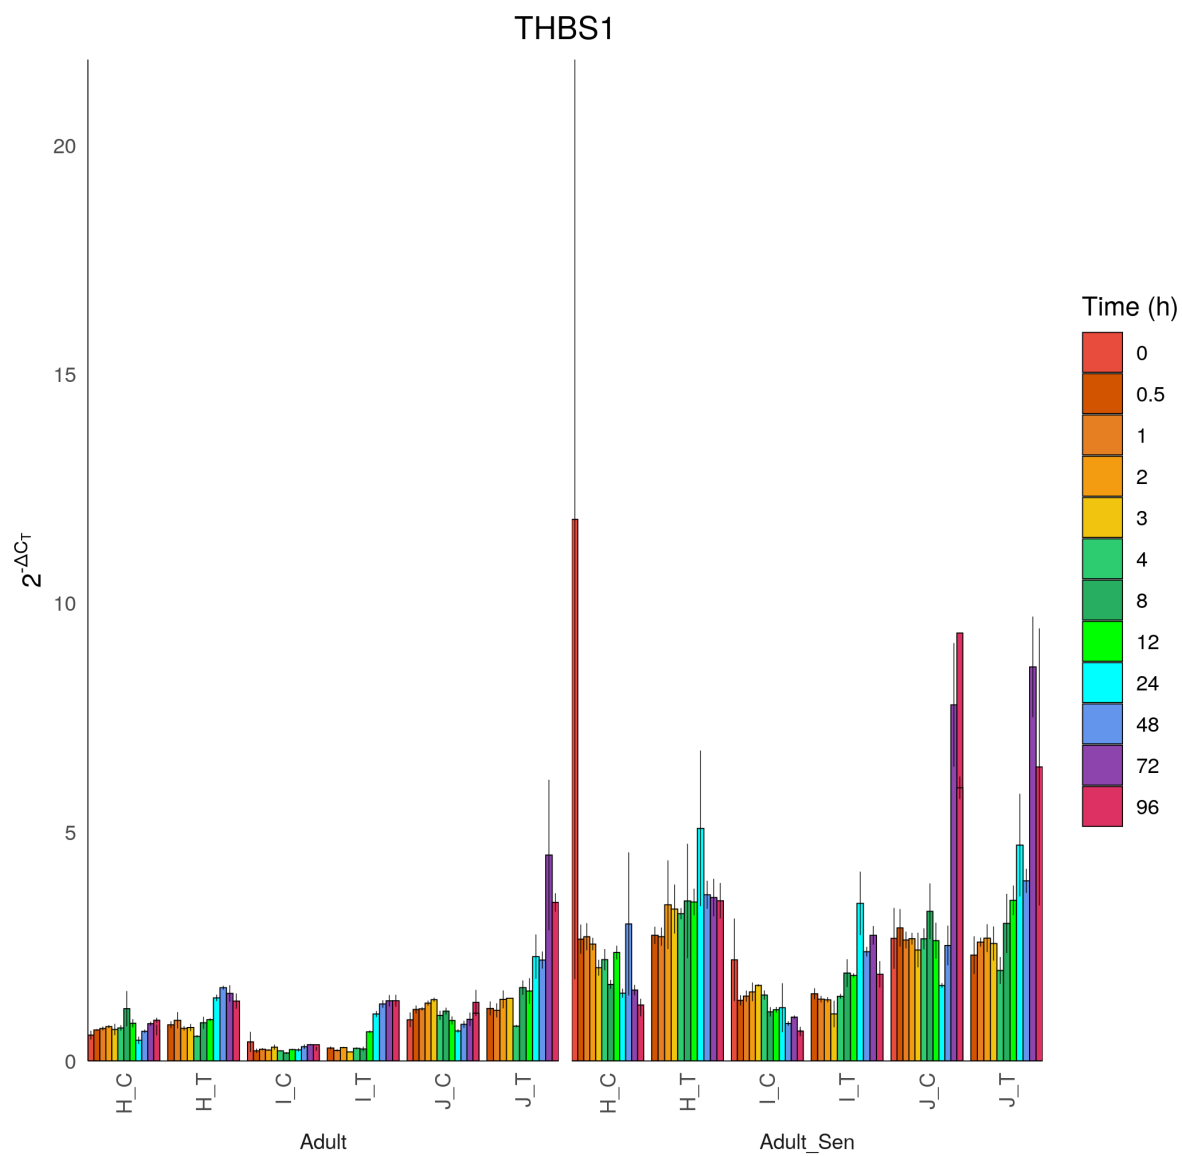

# THBS2

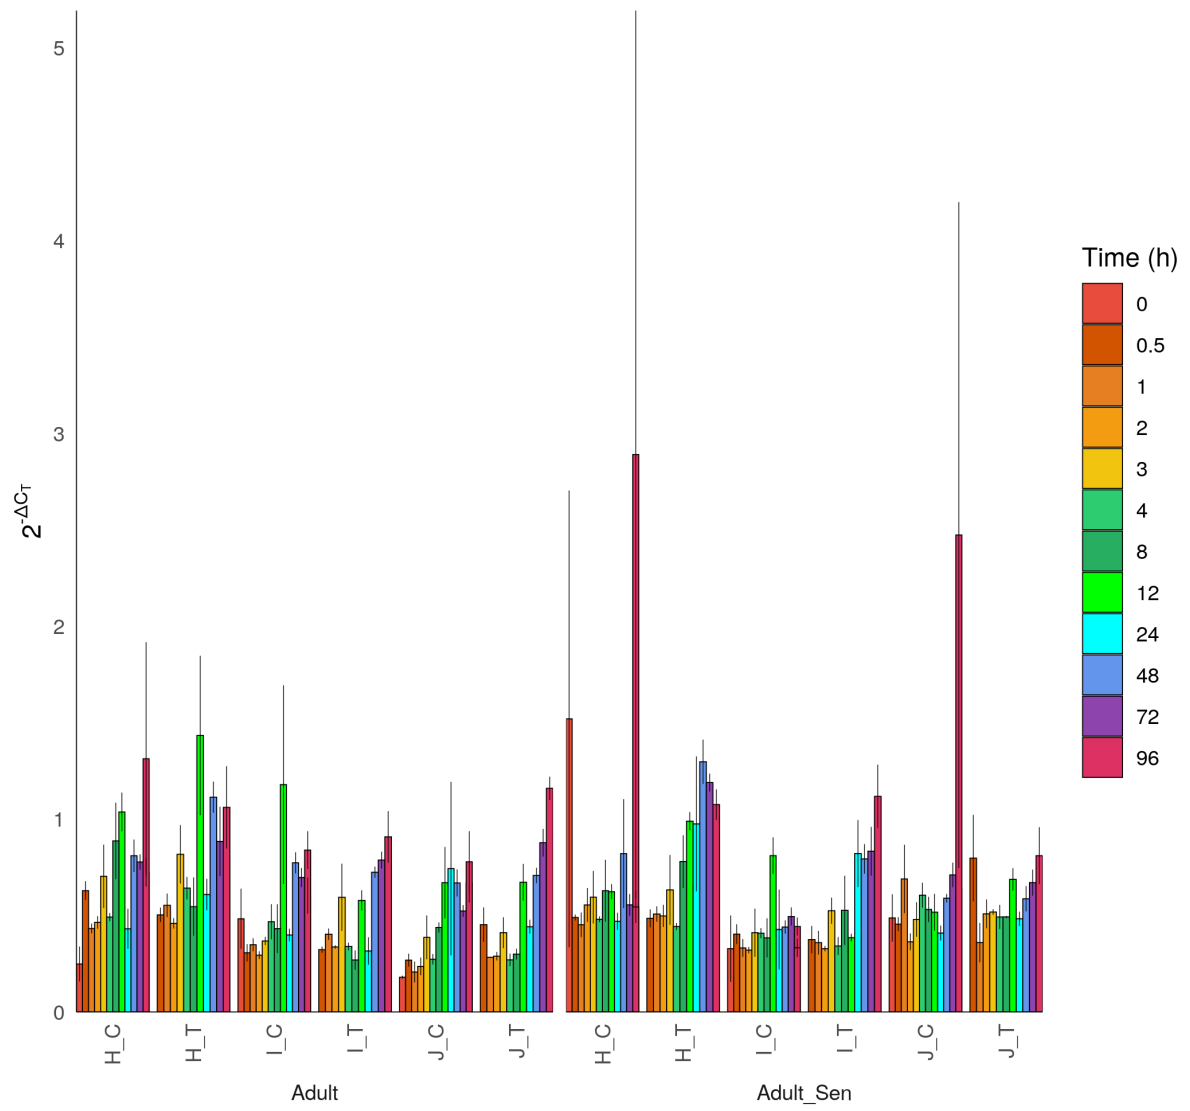

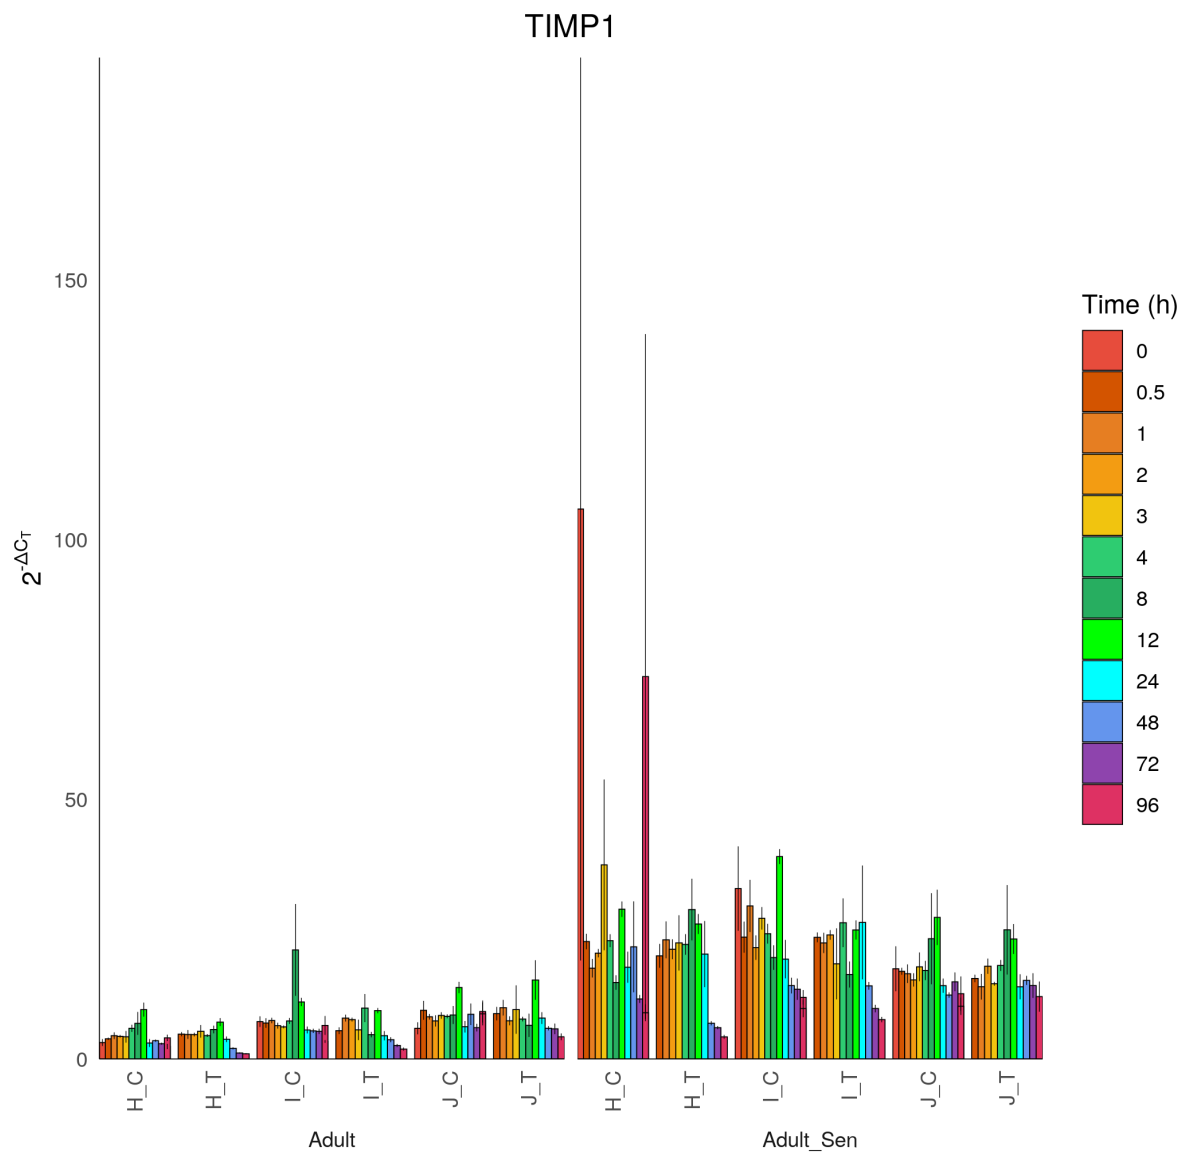



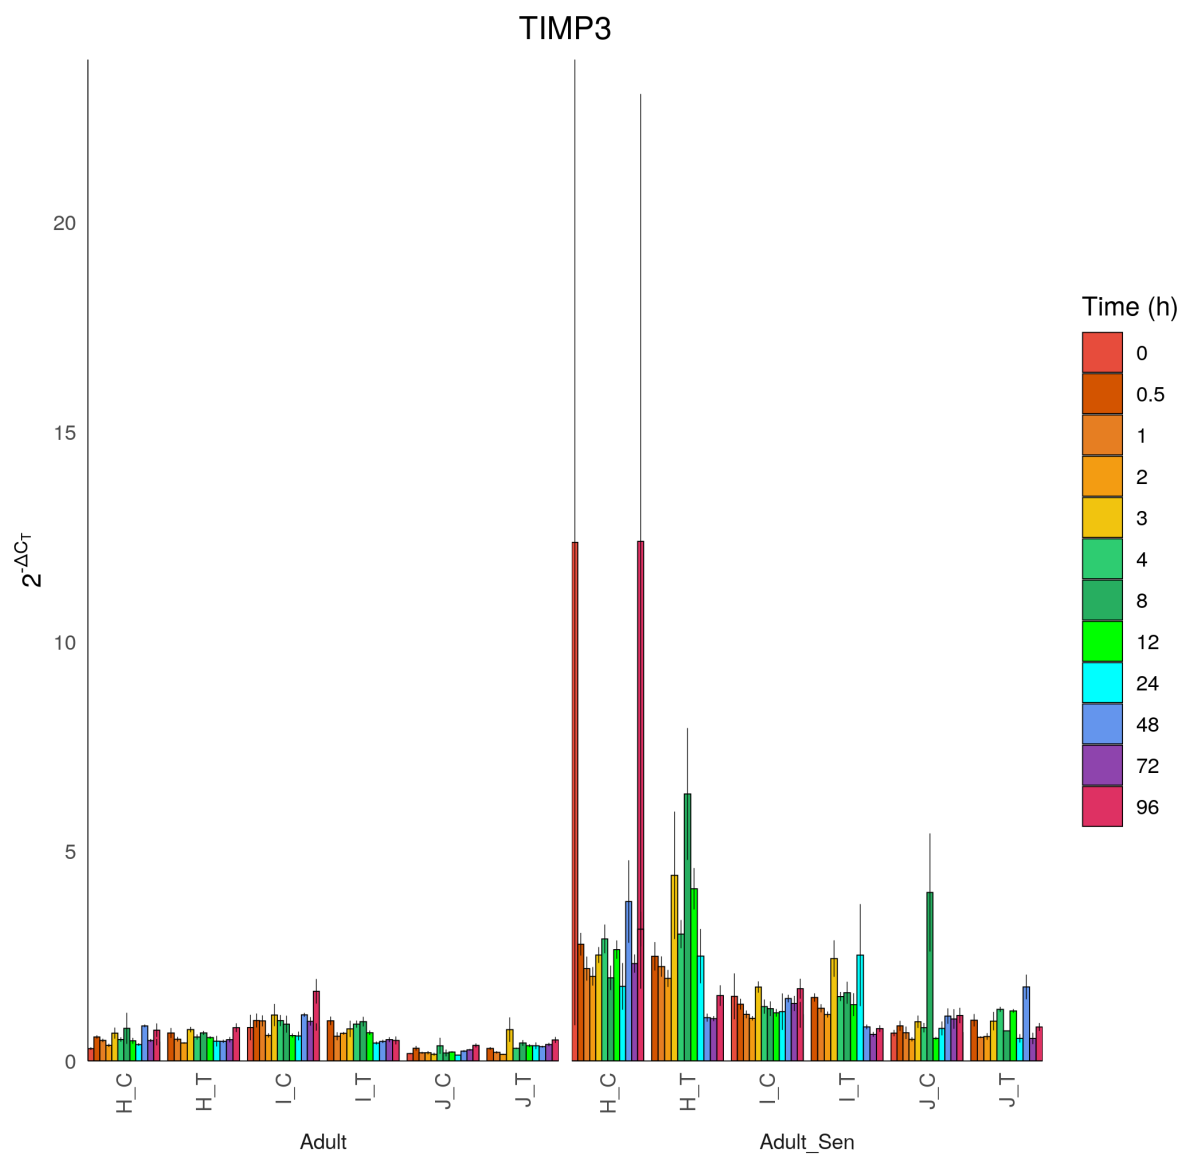

# TP53BP1

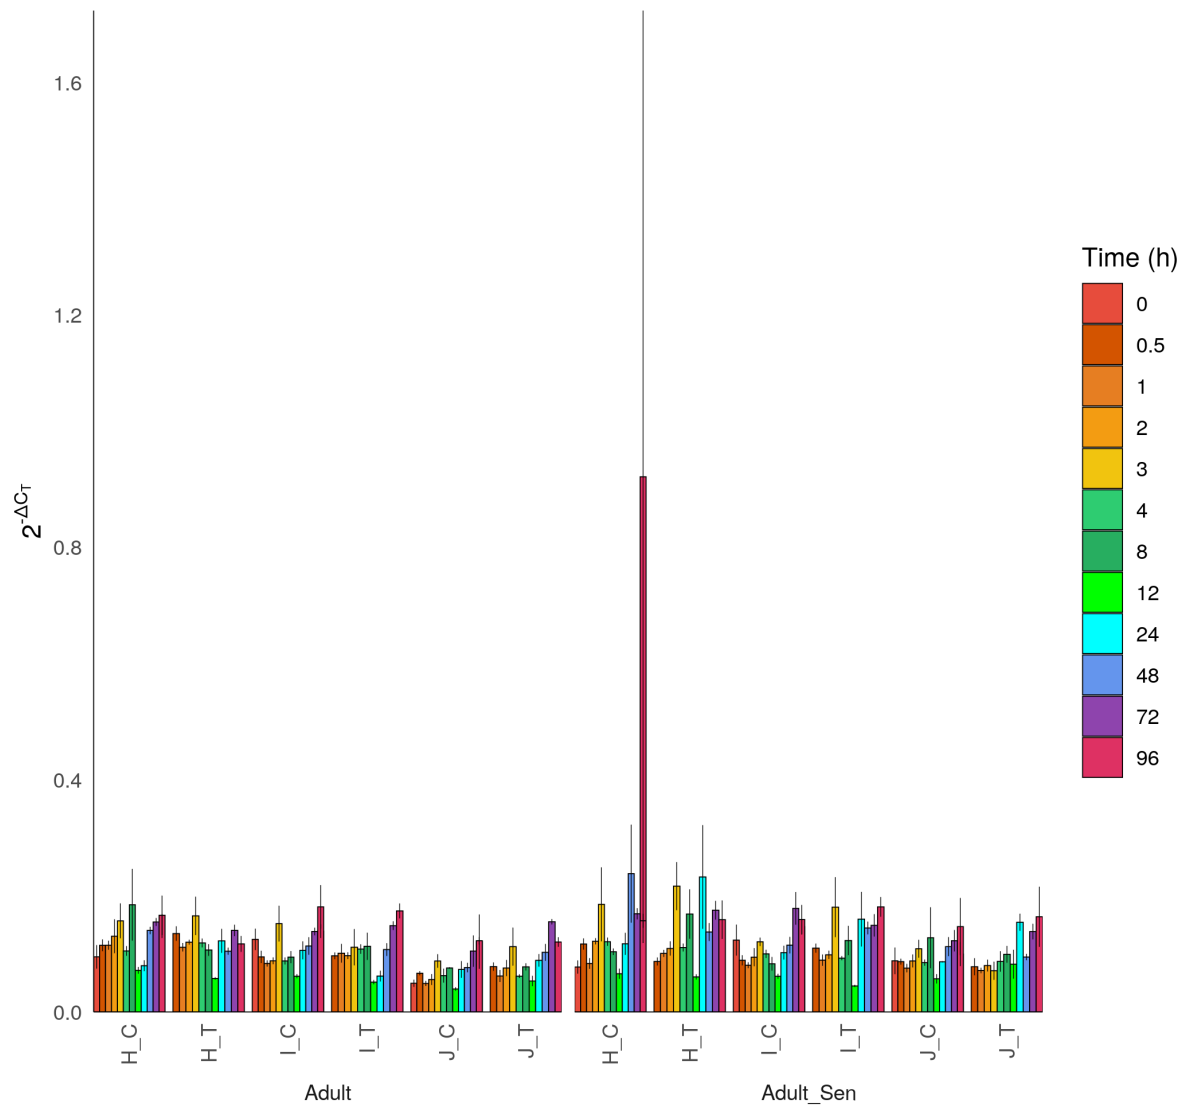

# VIM

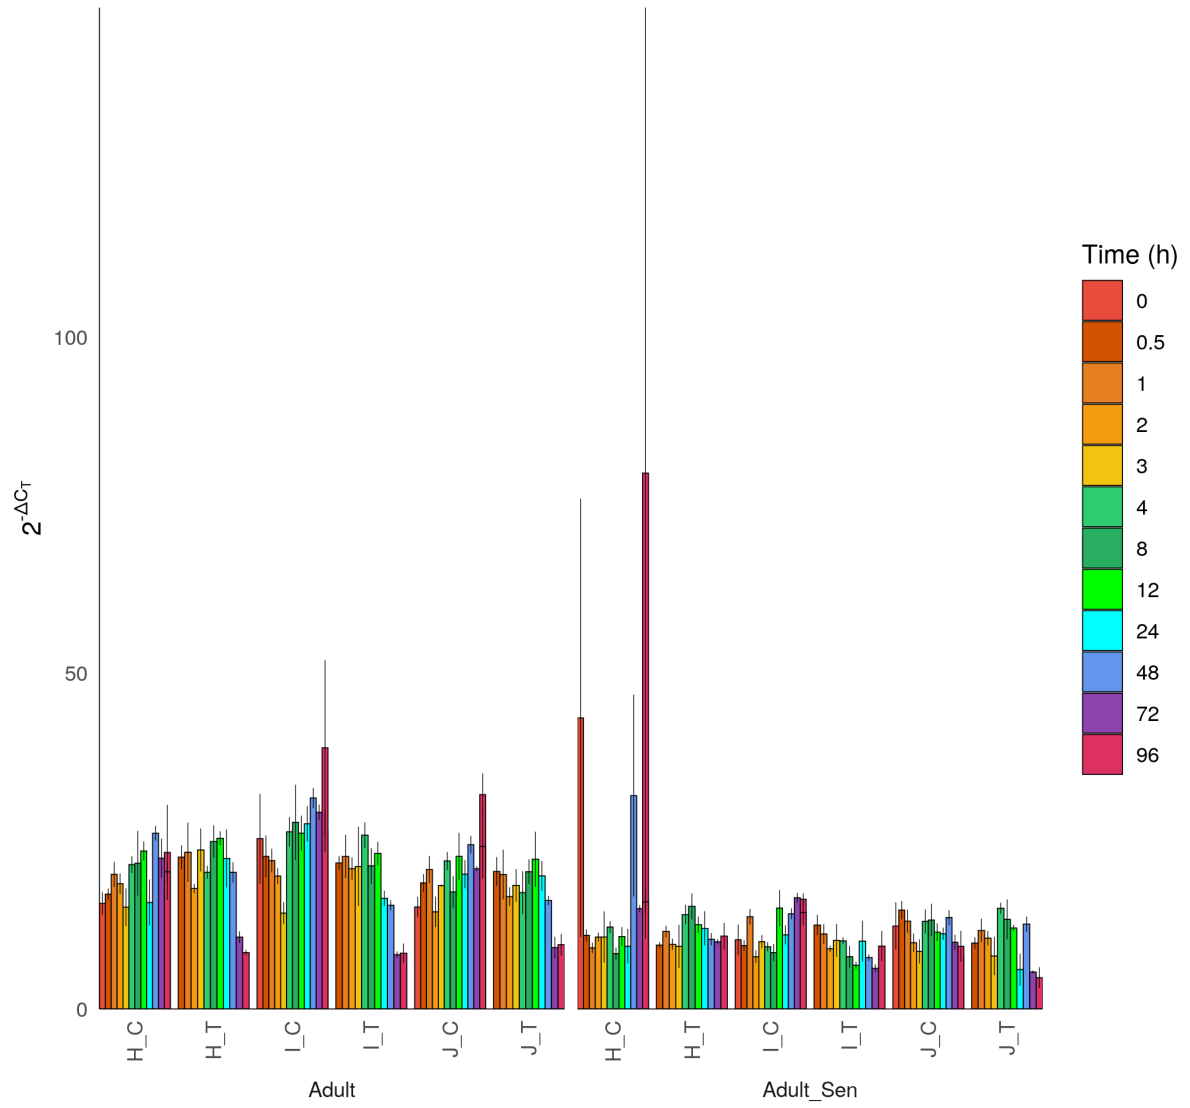

Supplement: s1 [file s1]
