# Supplementary material for: Cell Senescence-Independent Changes of Human Skin Fibroblasts with Age
Source: MDPI journal article supplement (doi:10.3390/cells13080659), 2024-04-09

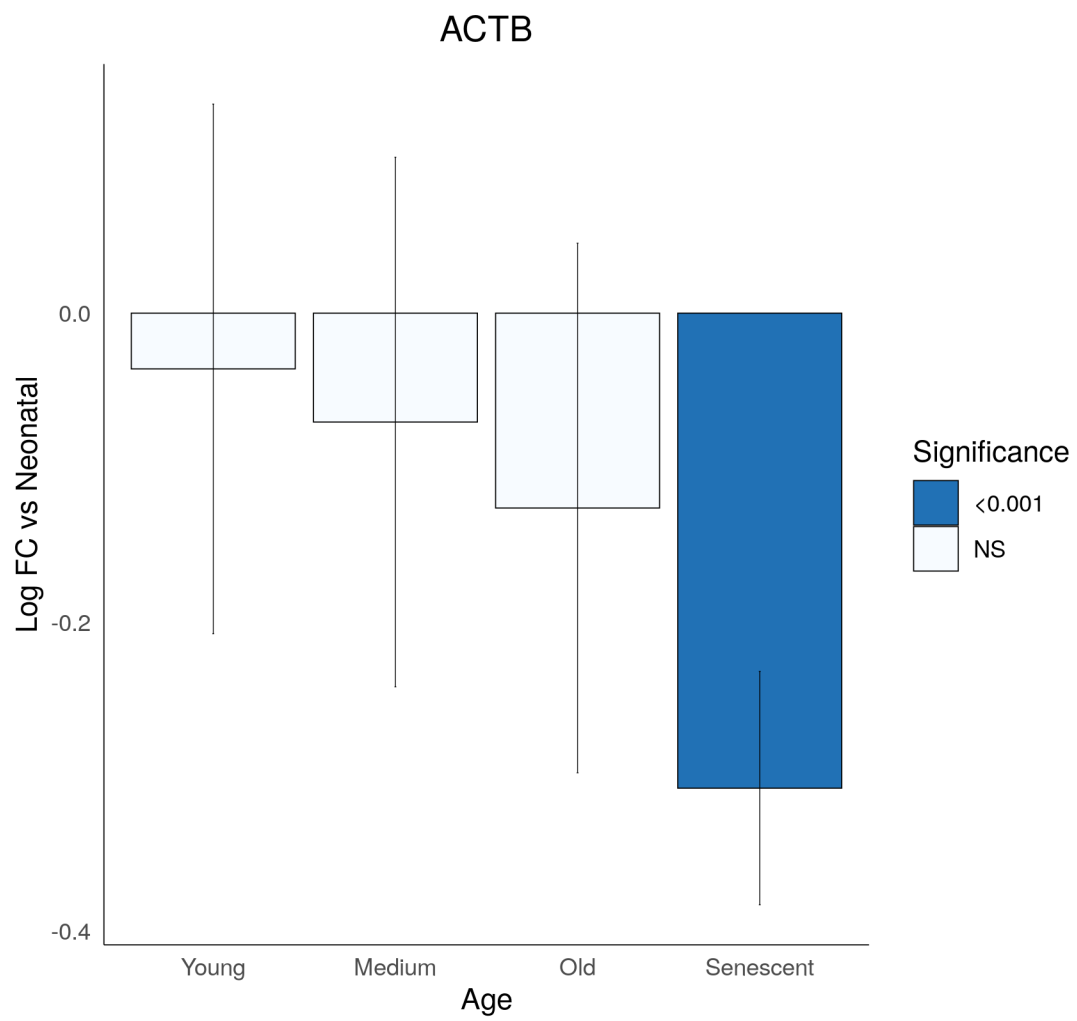

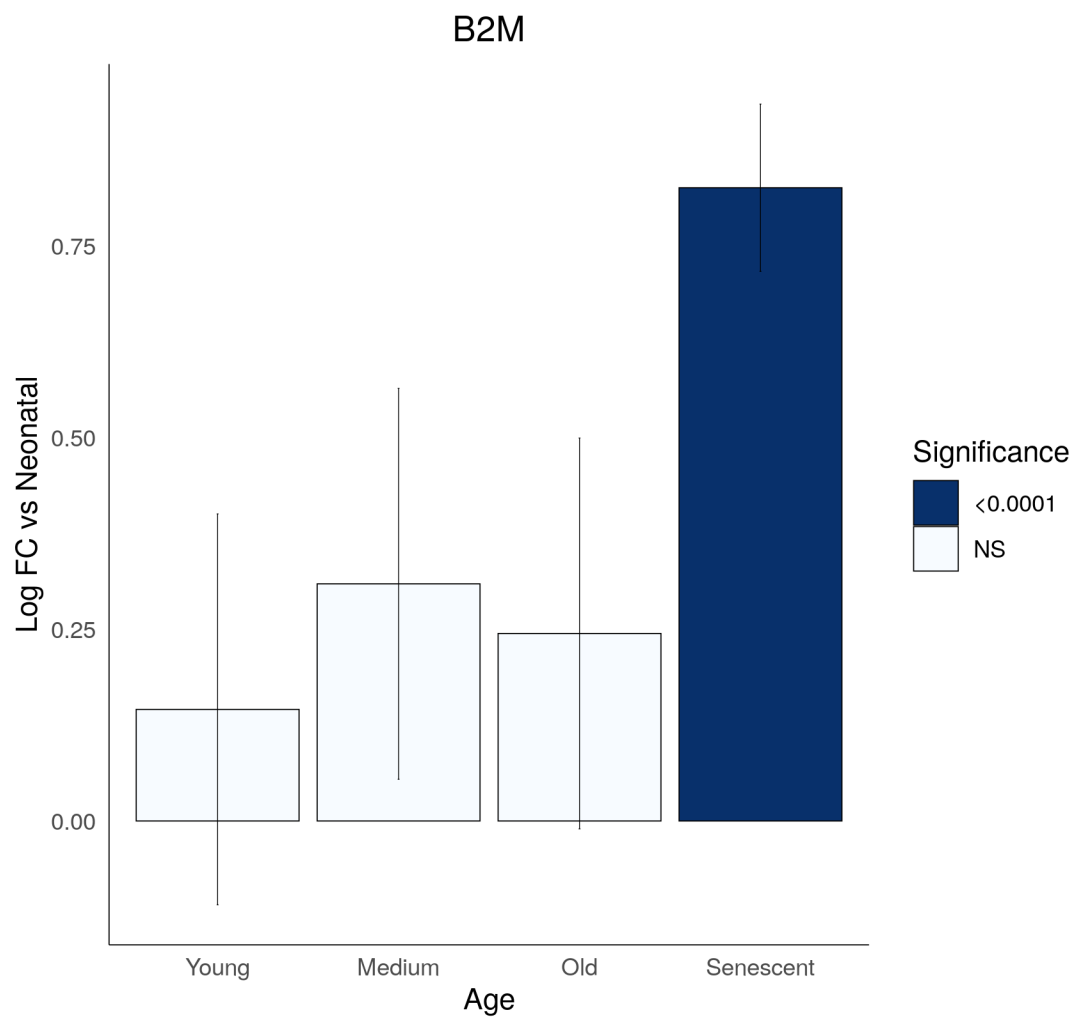

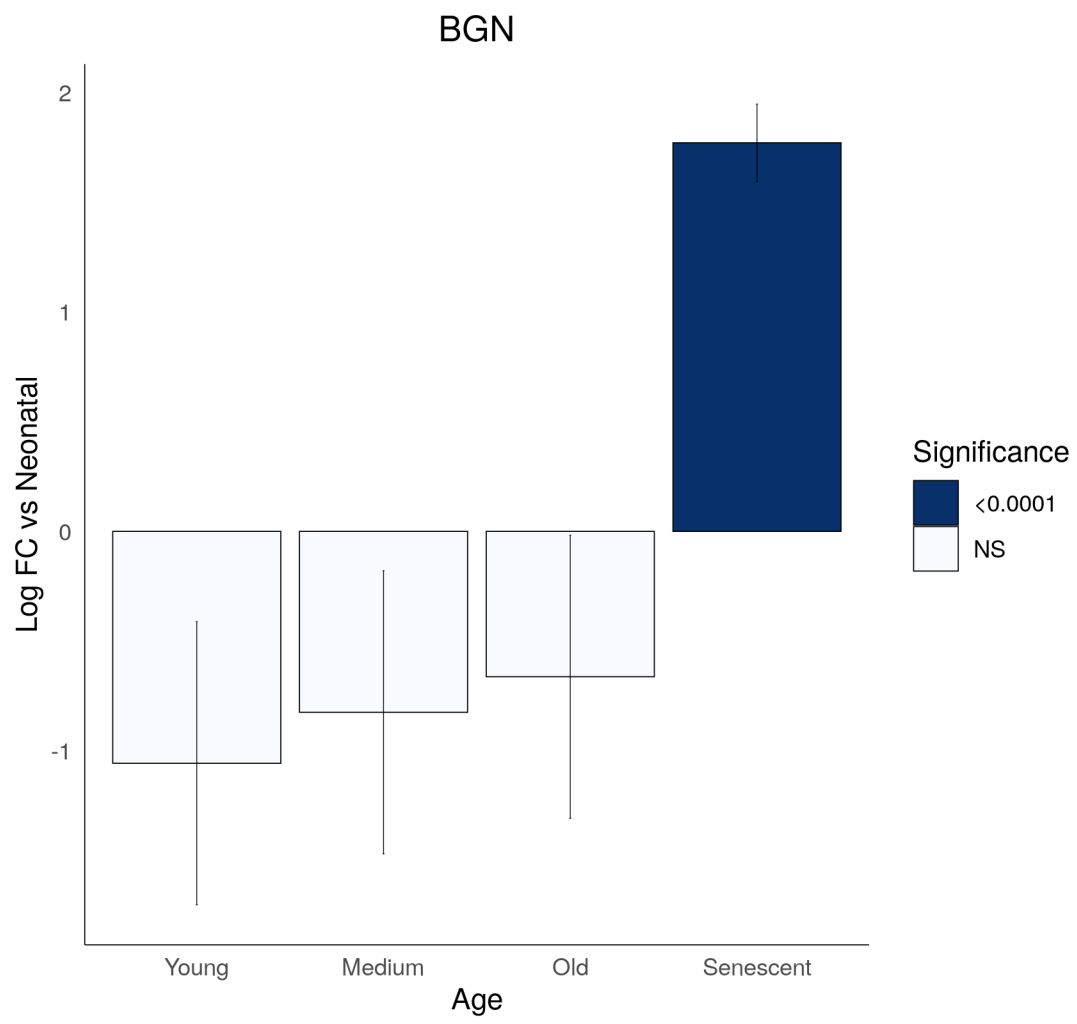

# COL1A1

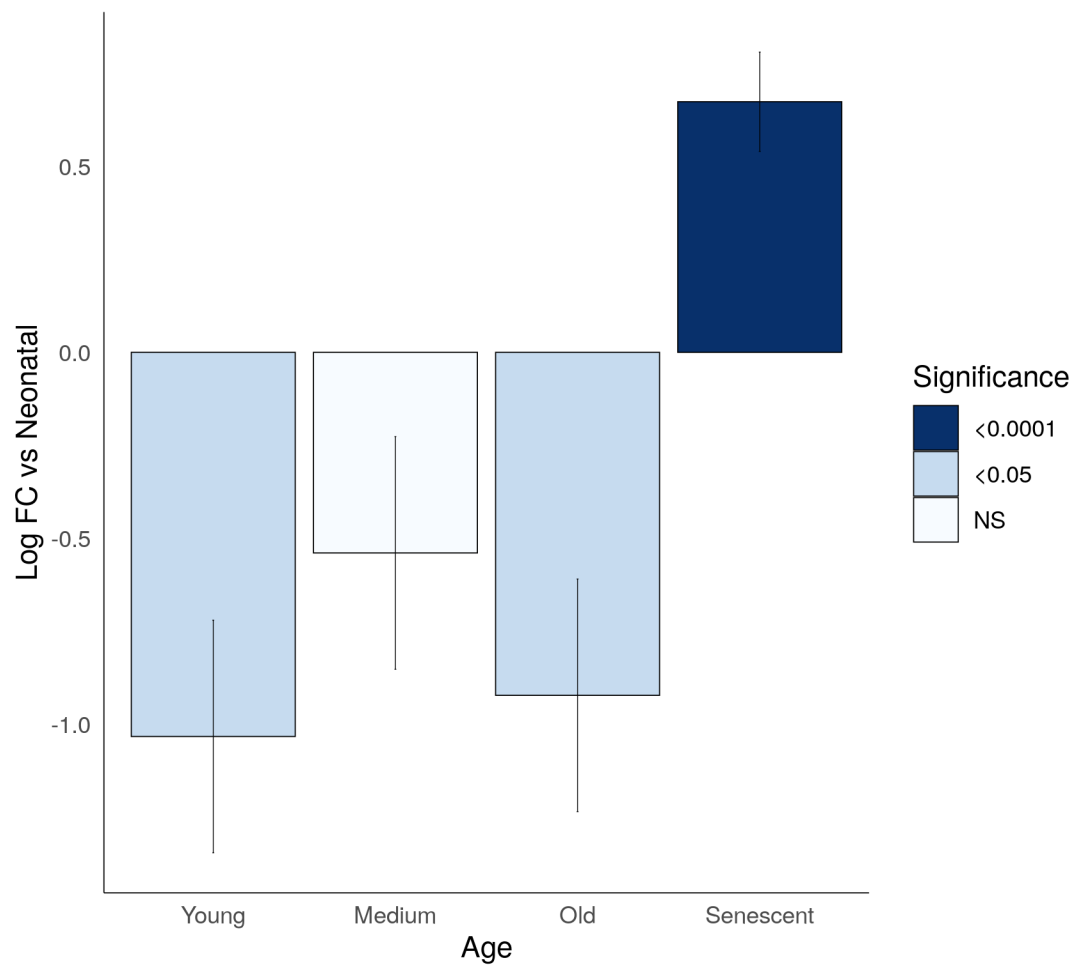

COL1A2

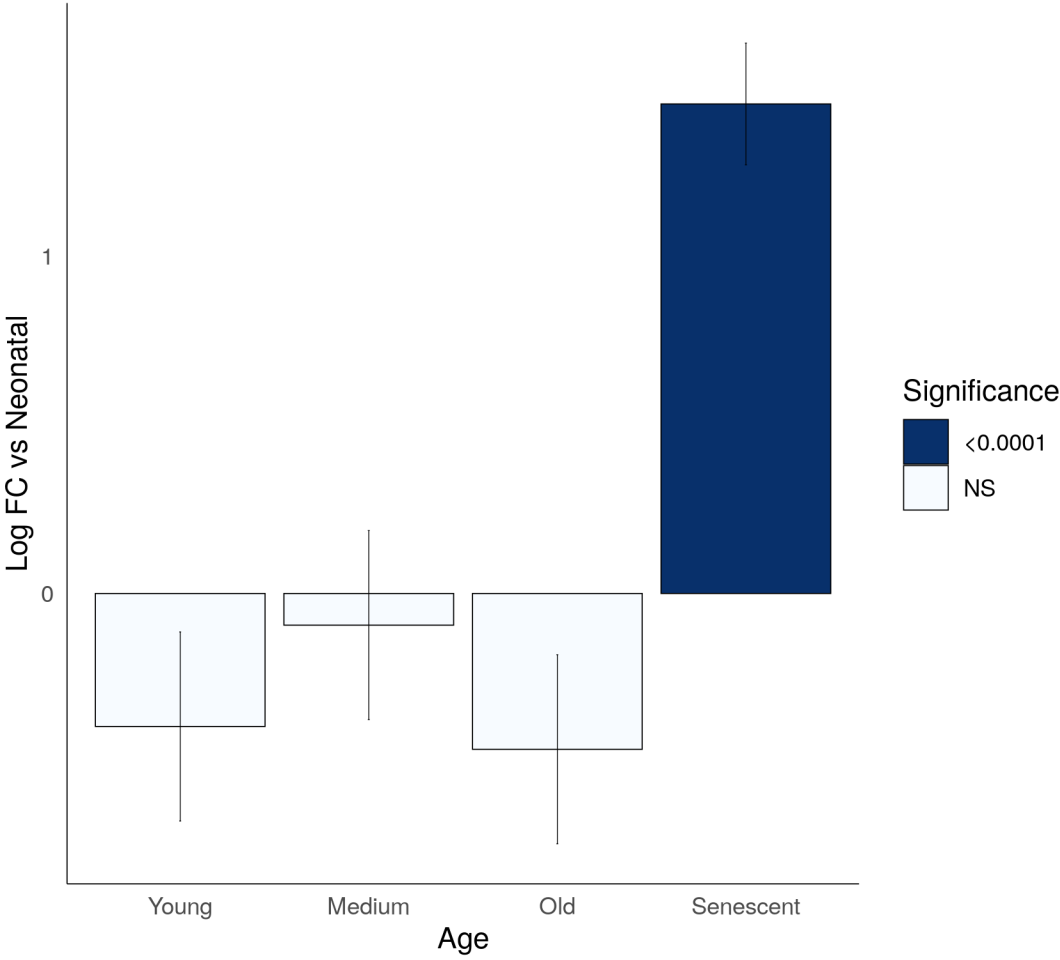

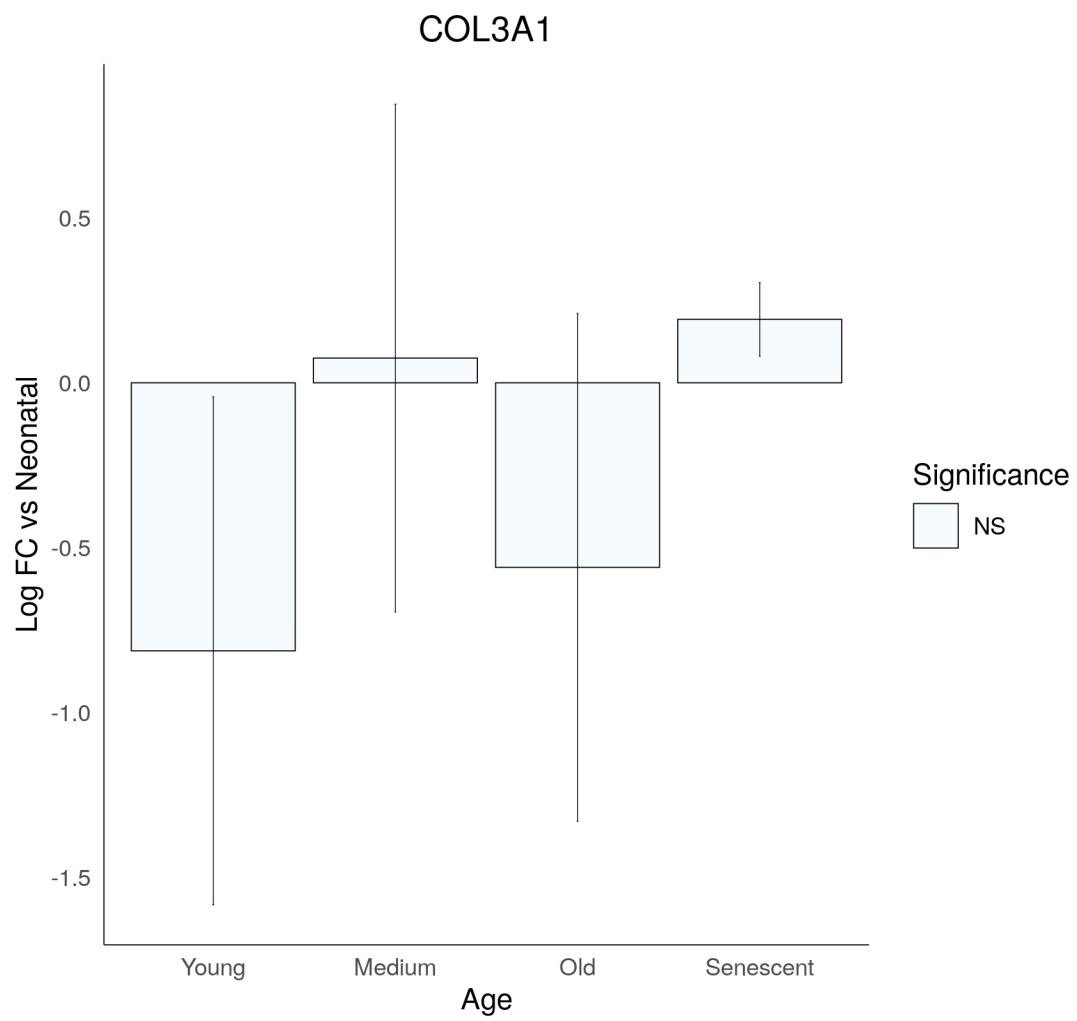

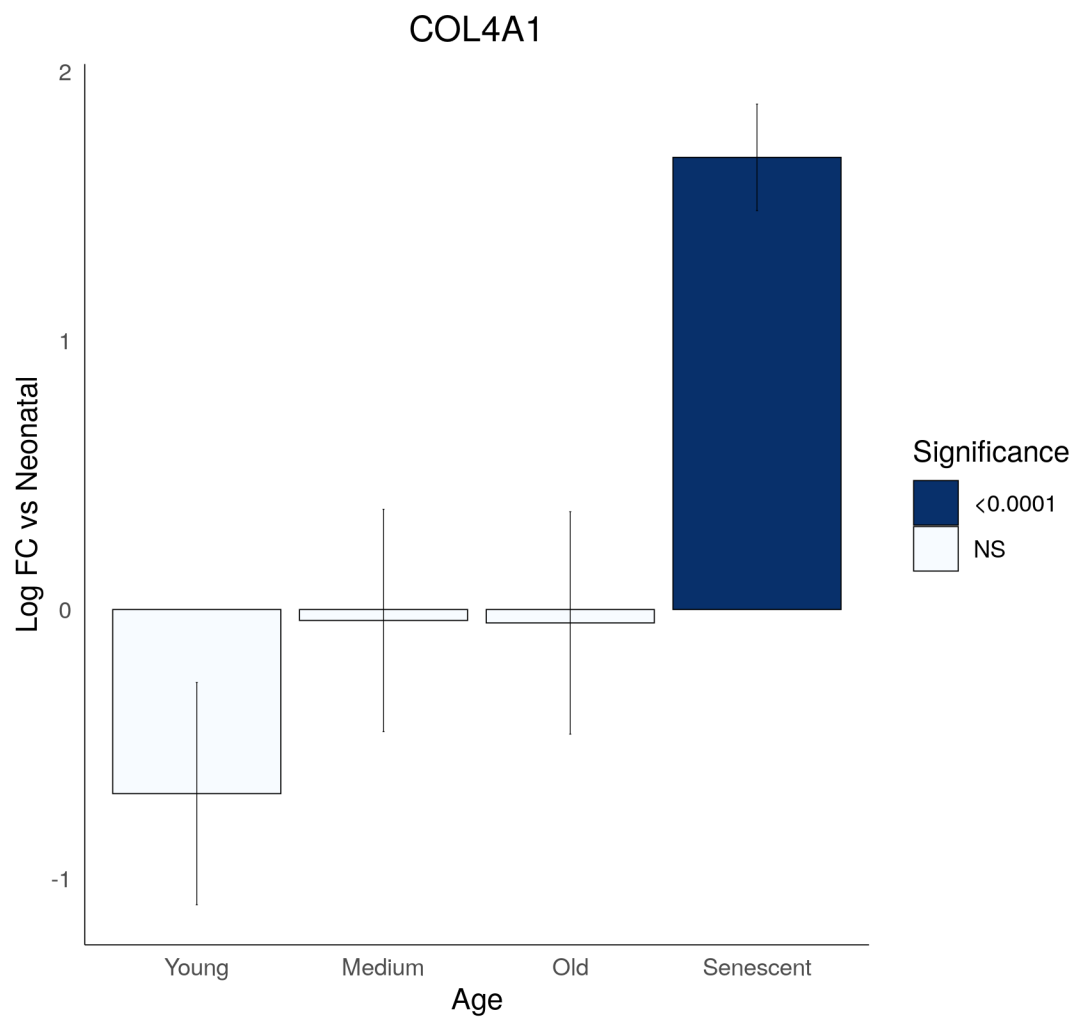

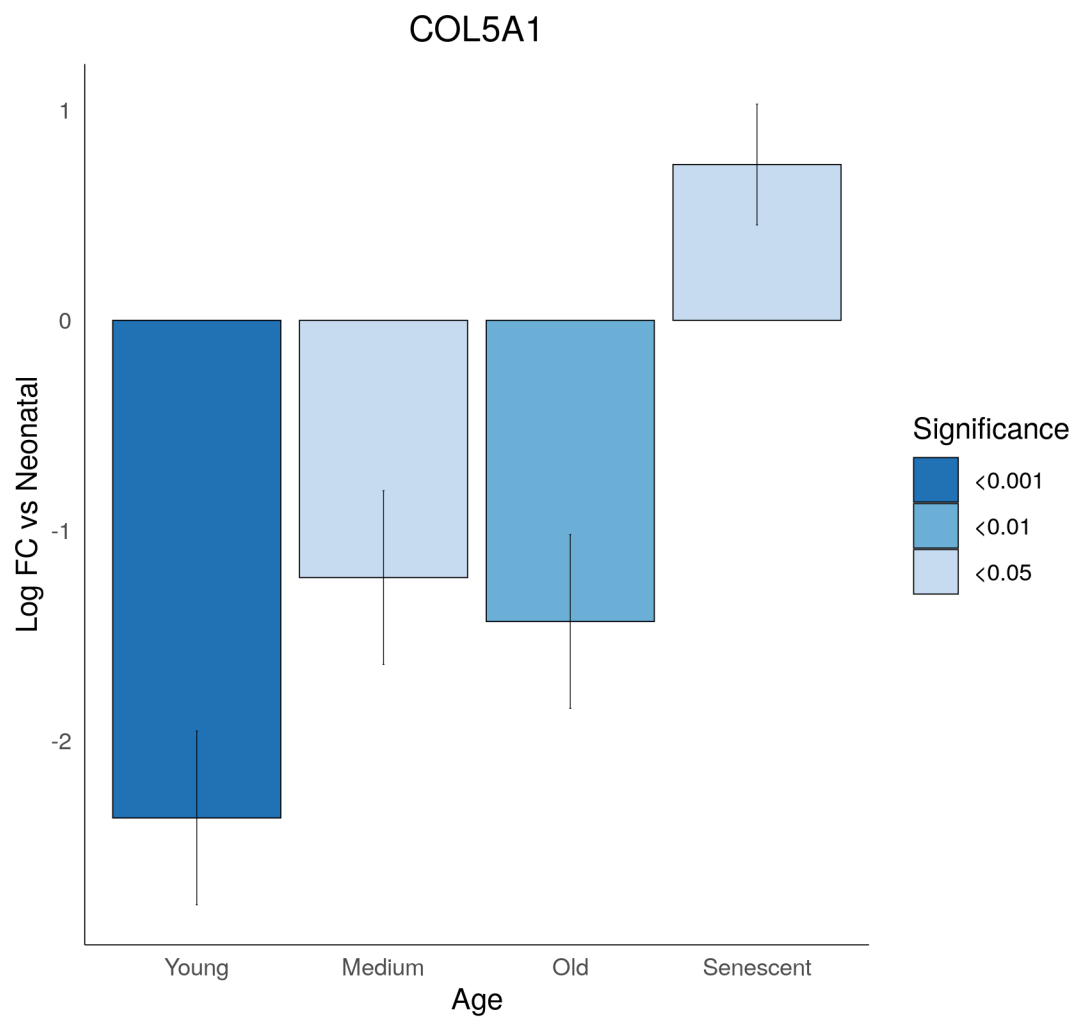



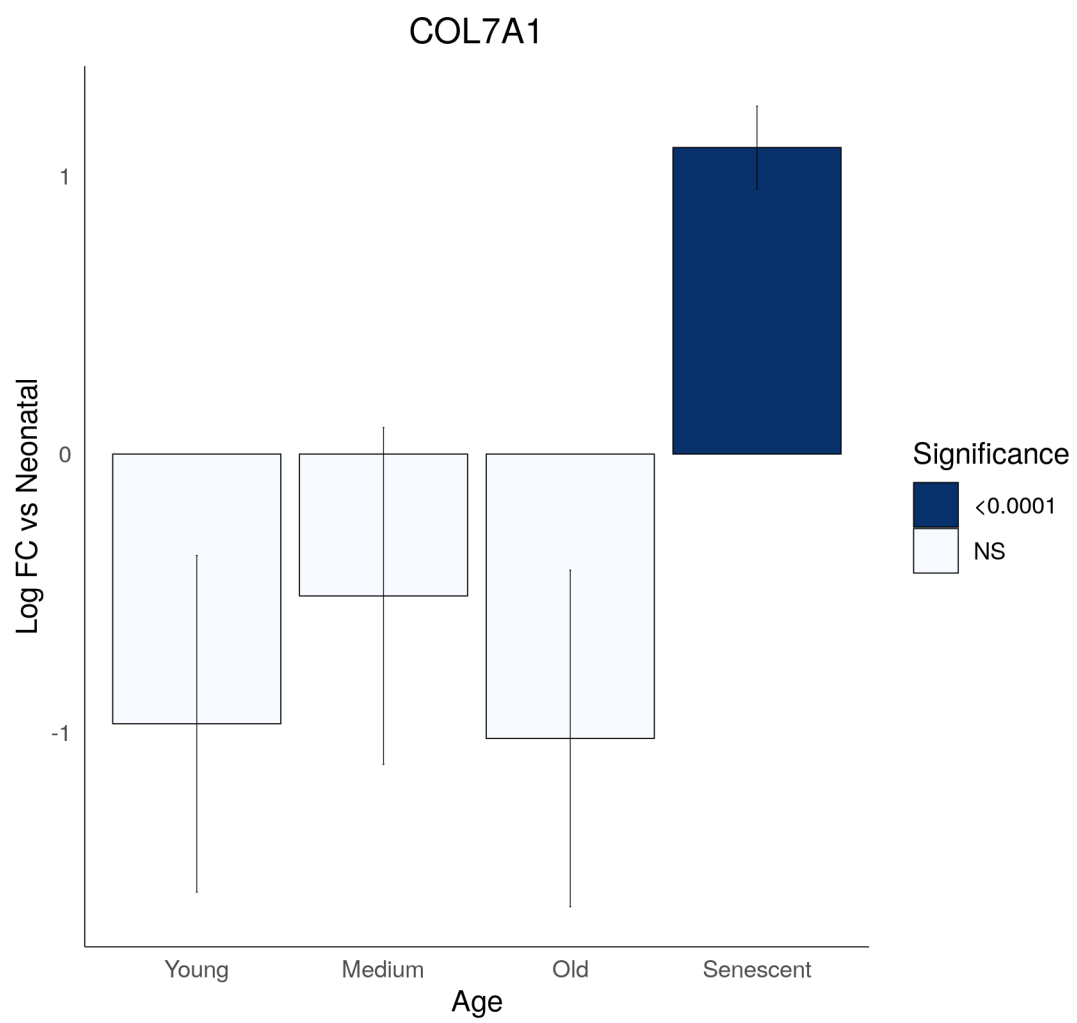

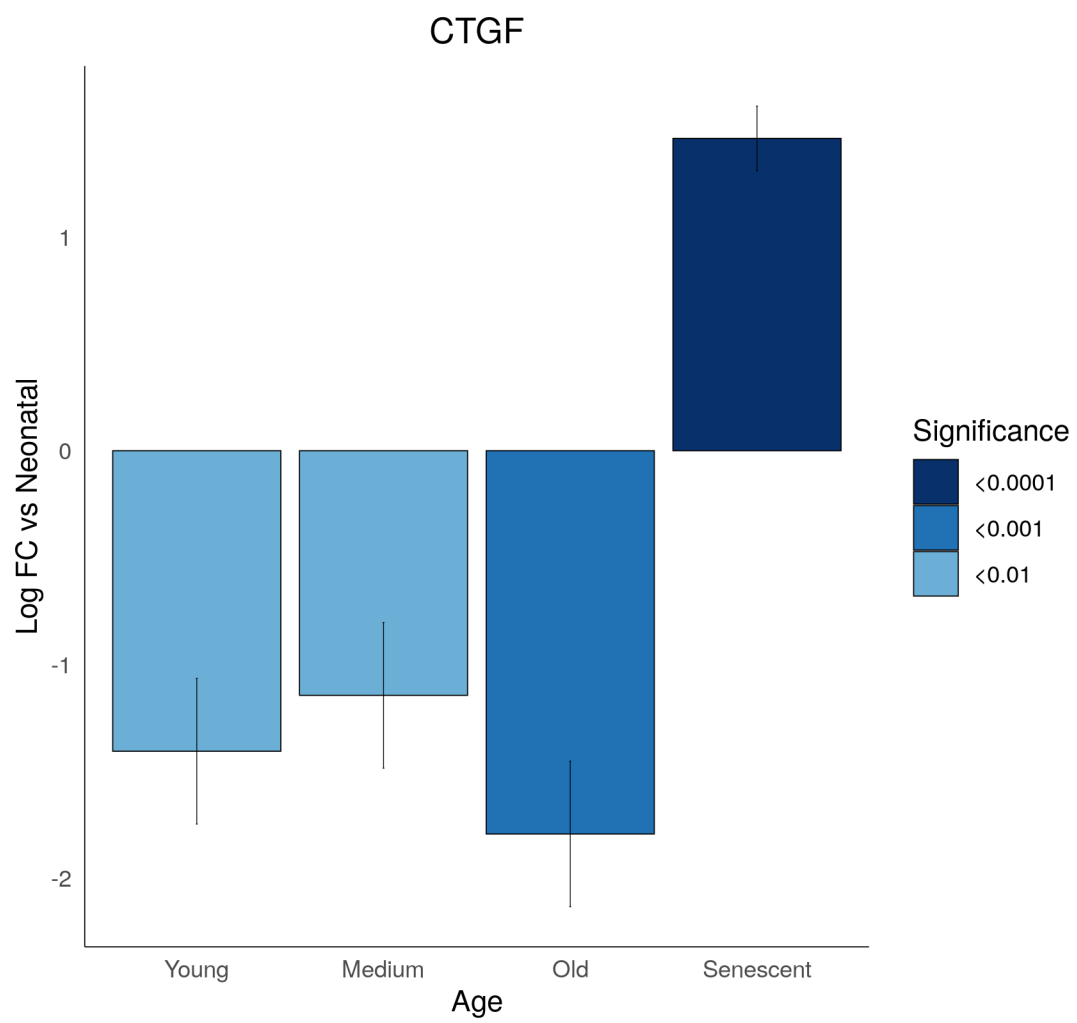

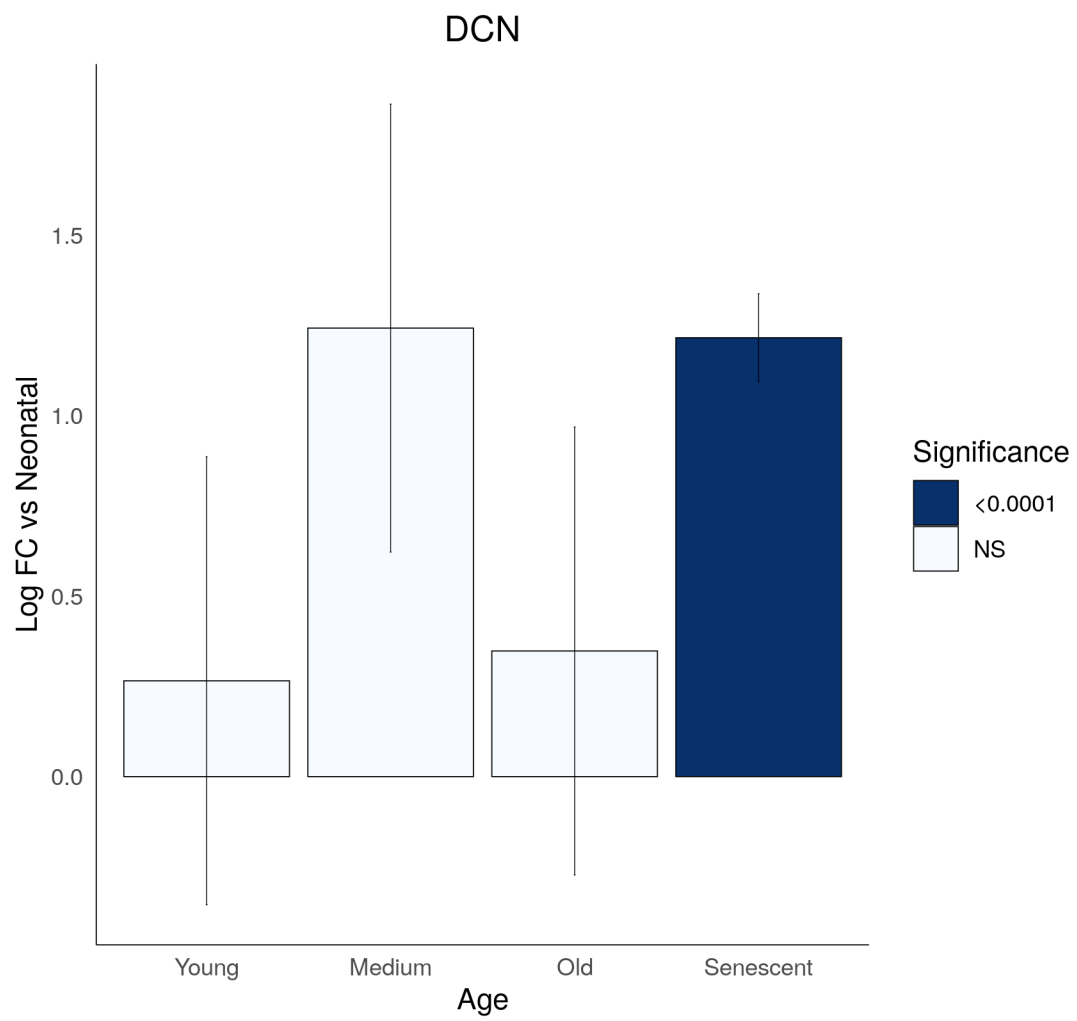

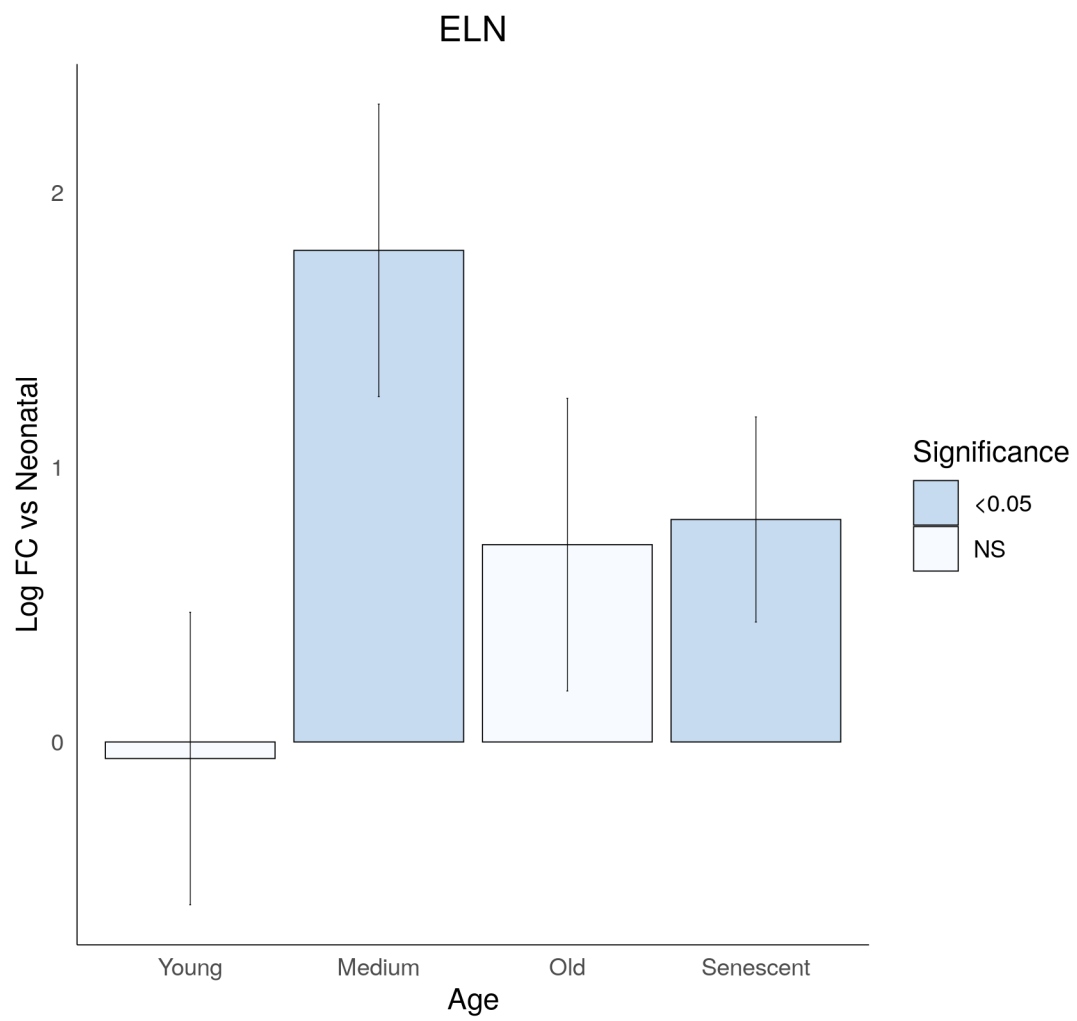

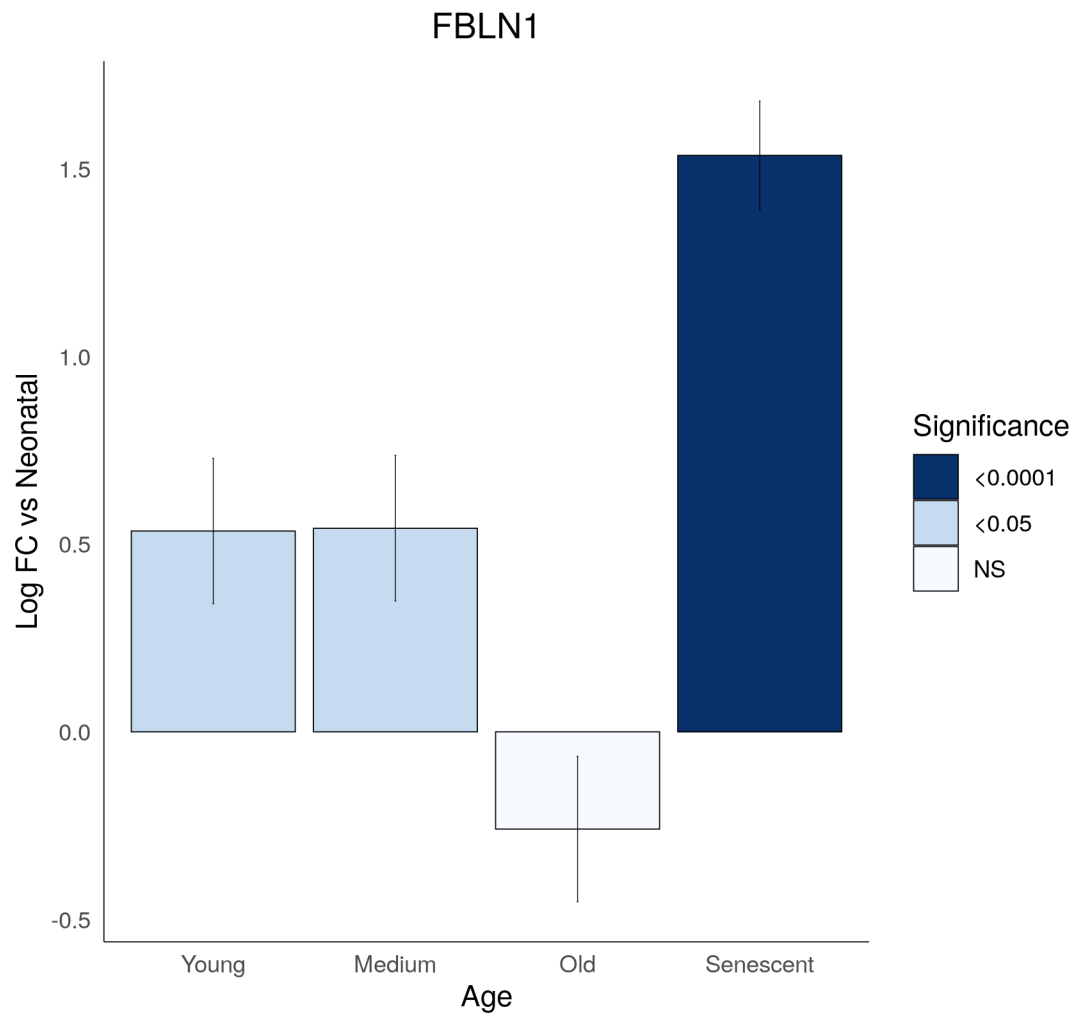

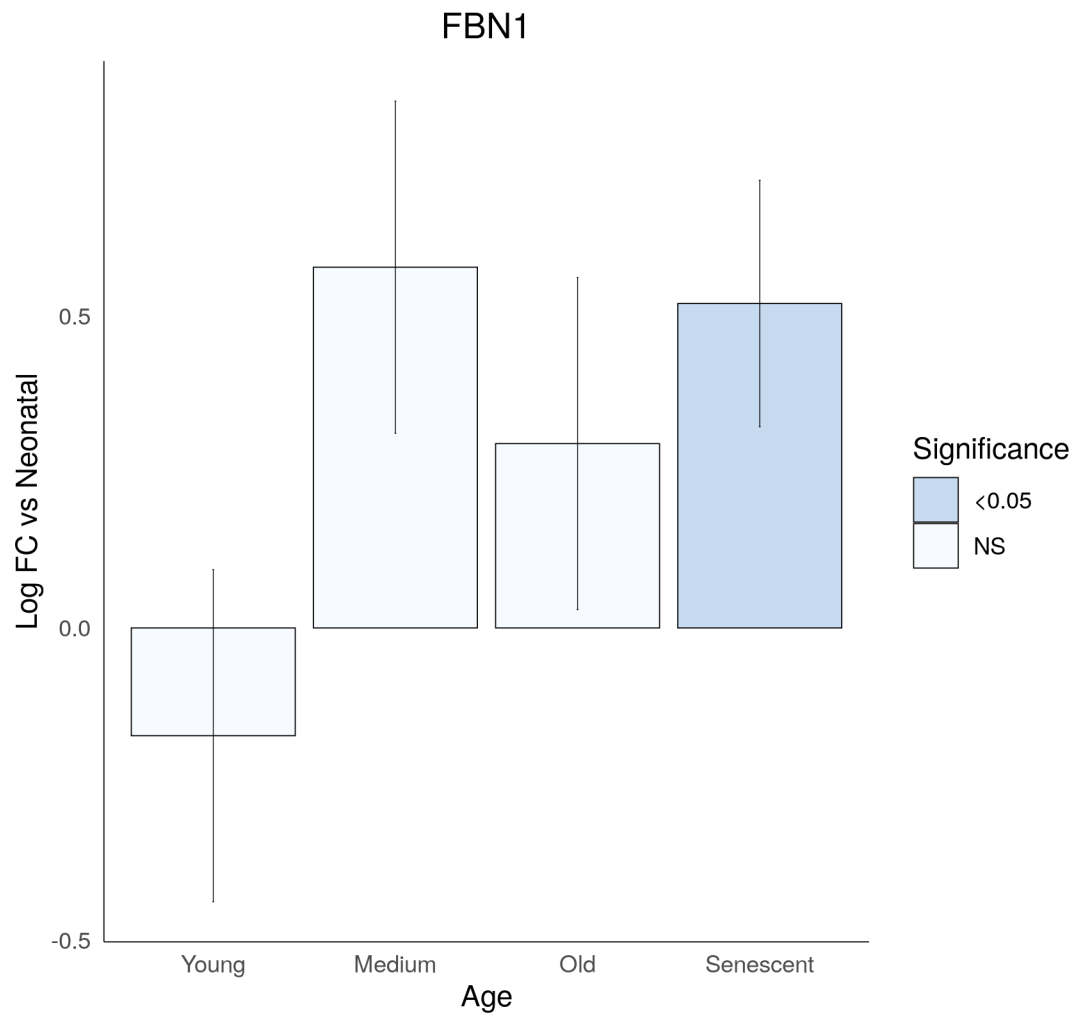

# FGFR3

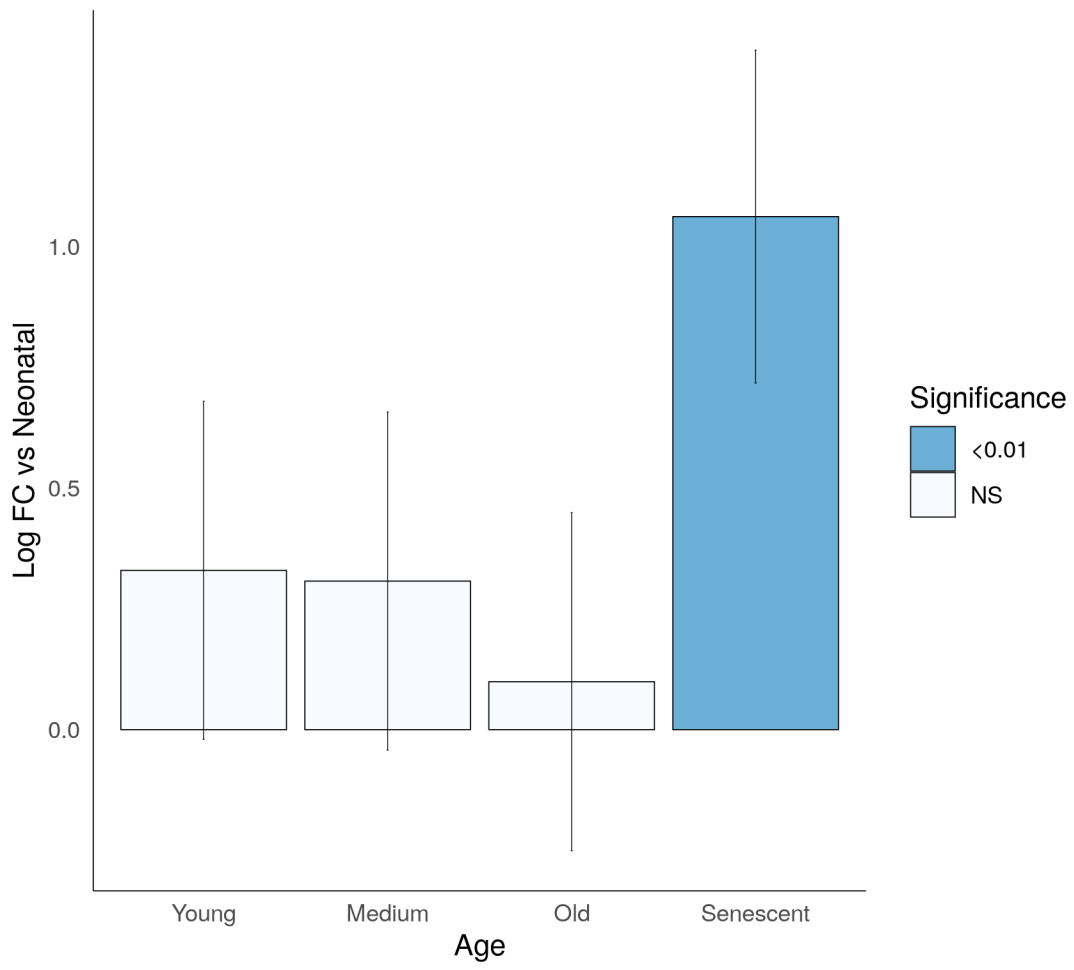

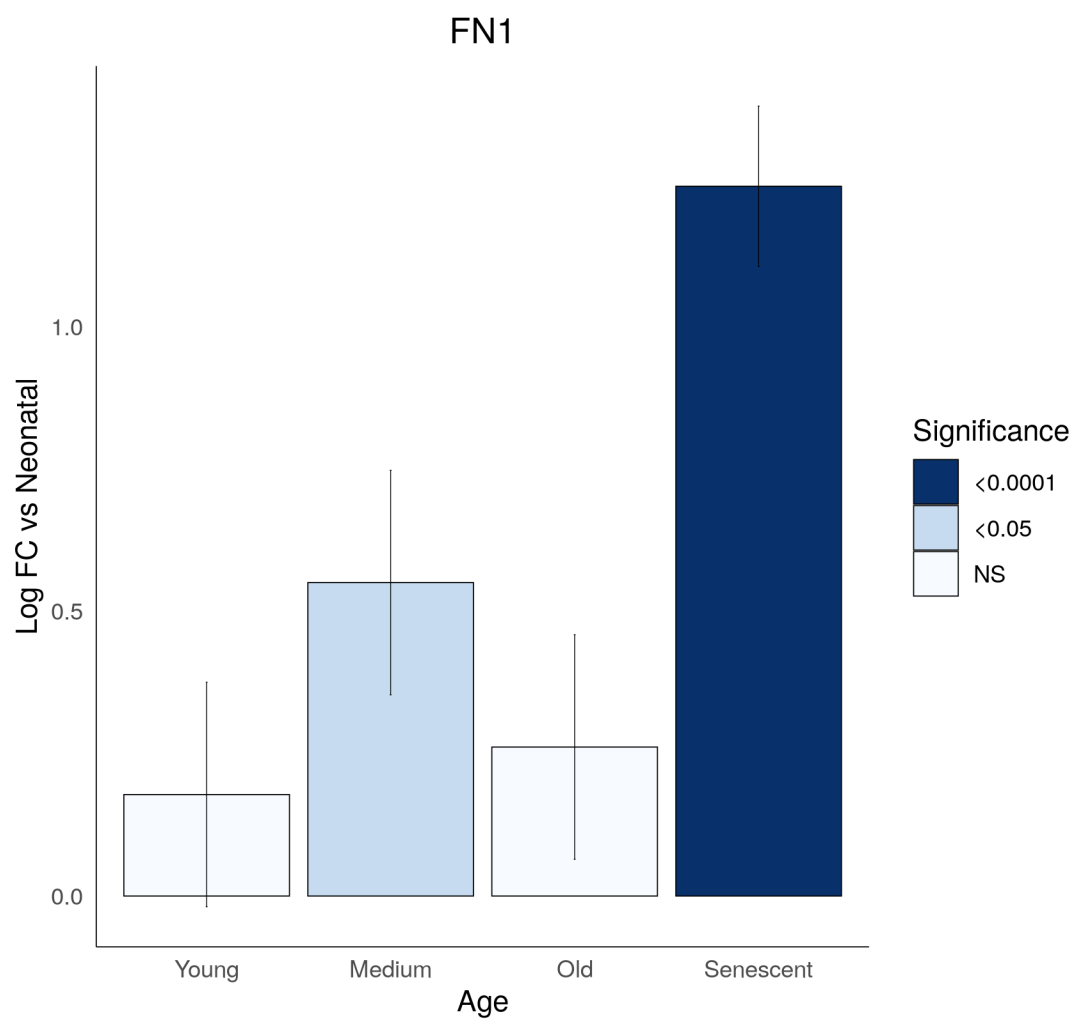



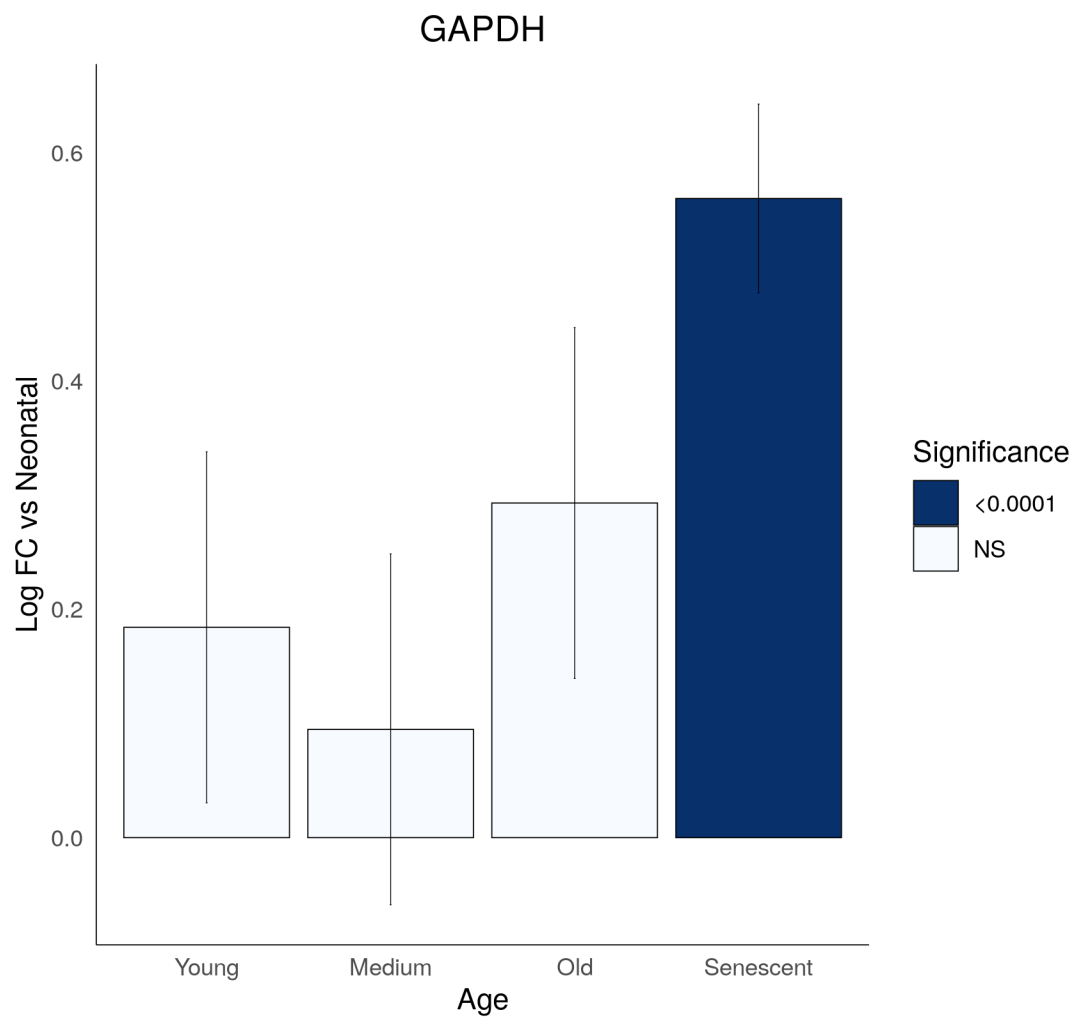

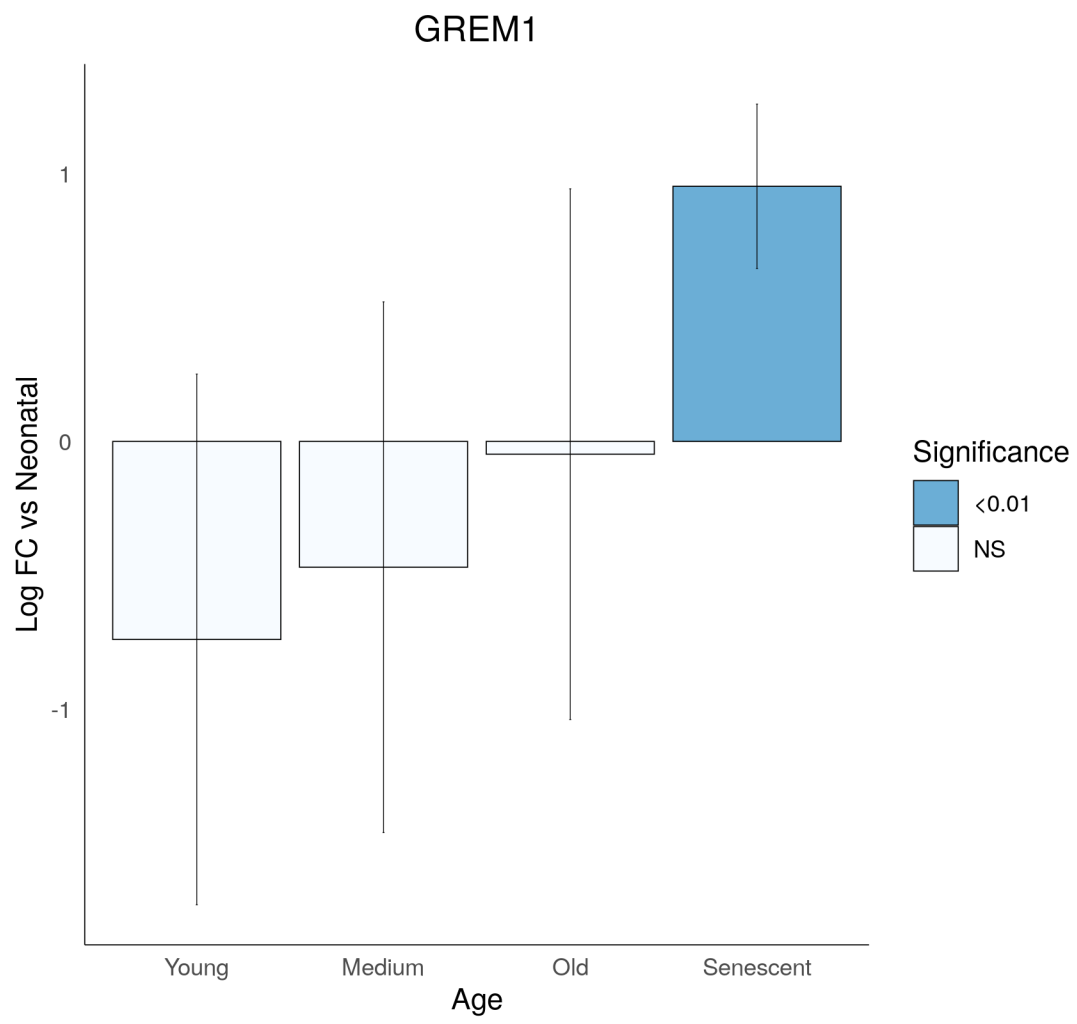

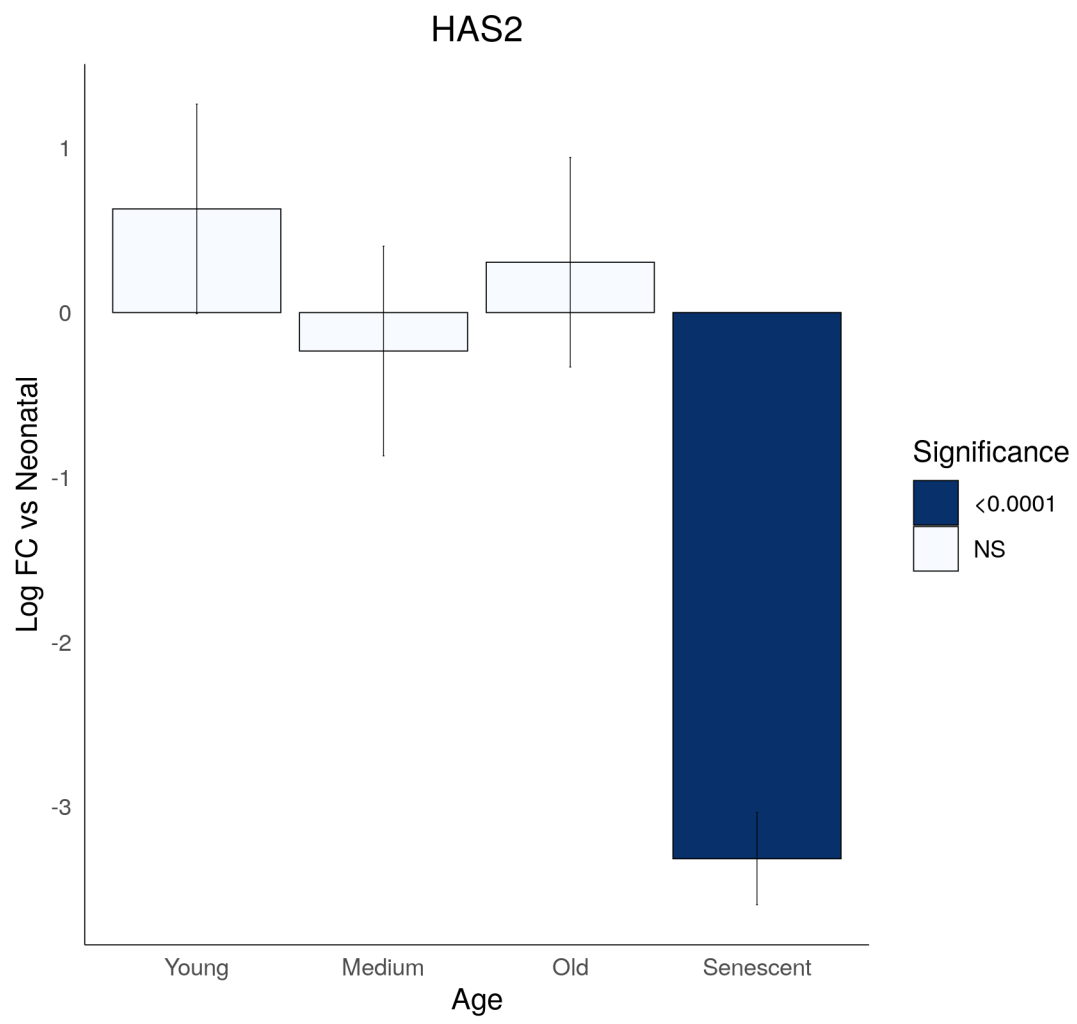

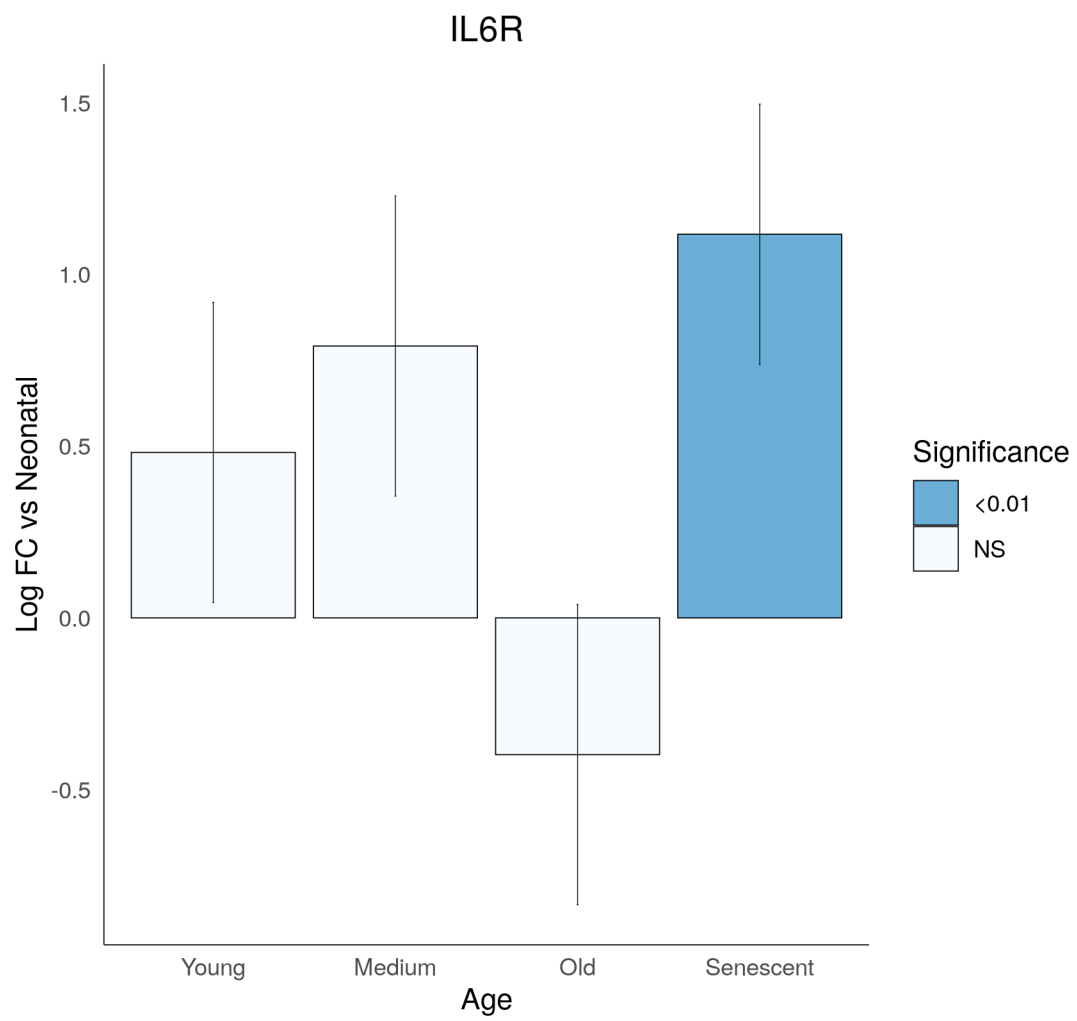

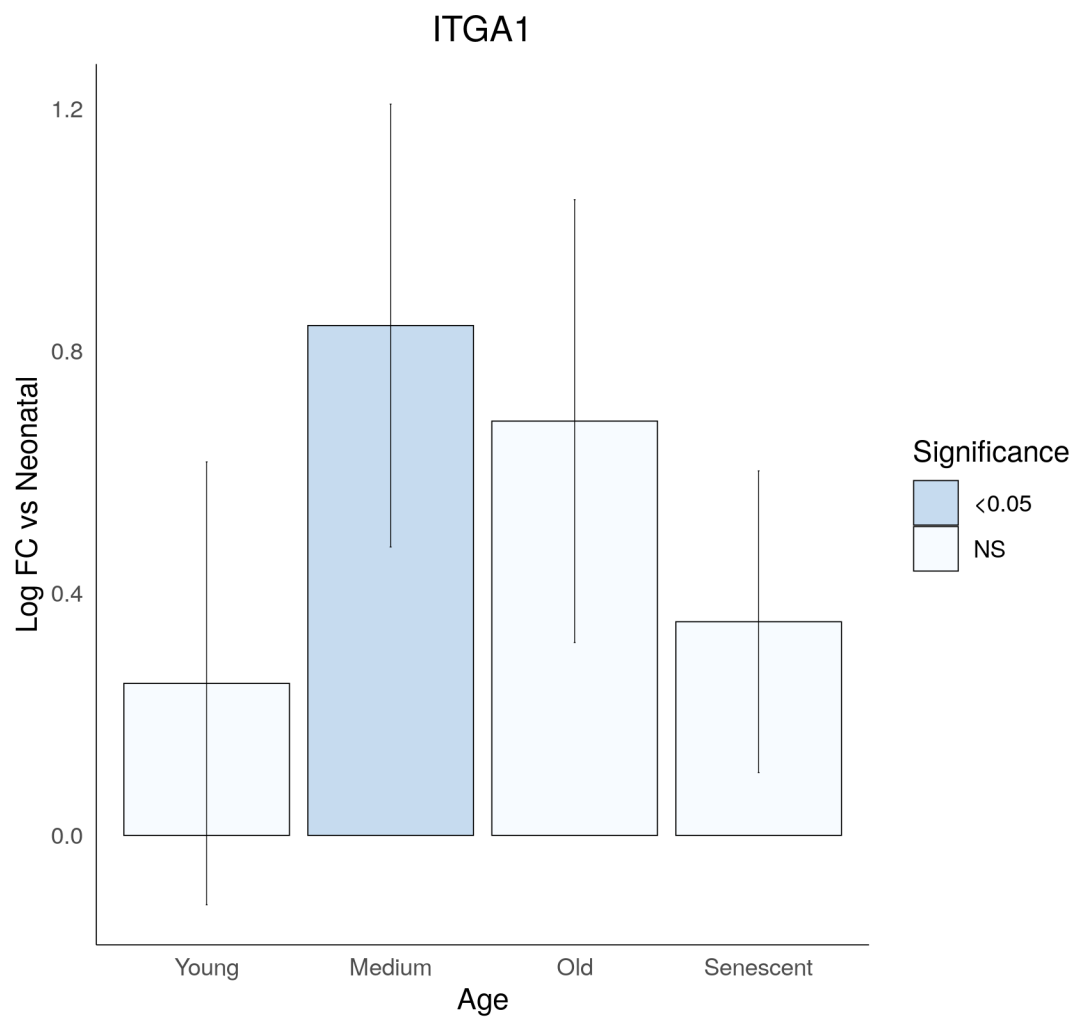

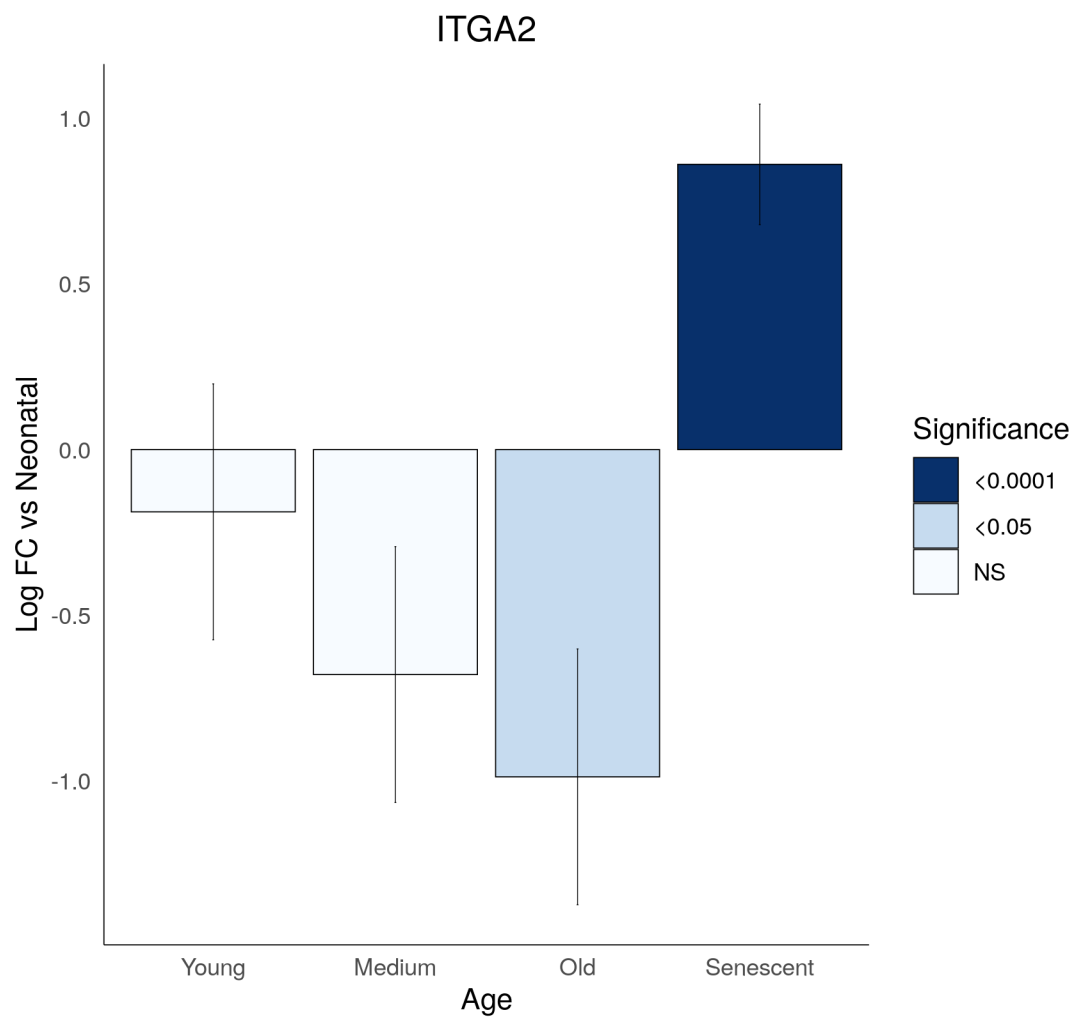

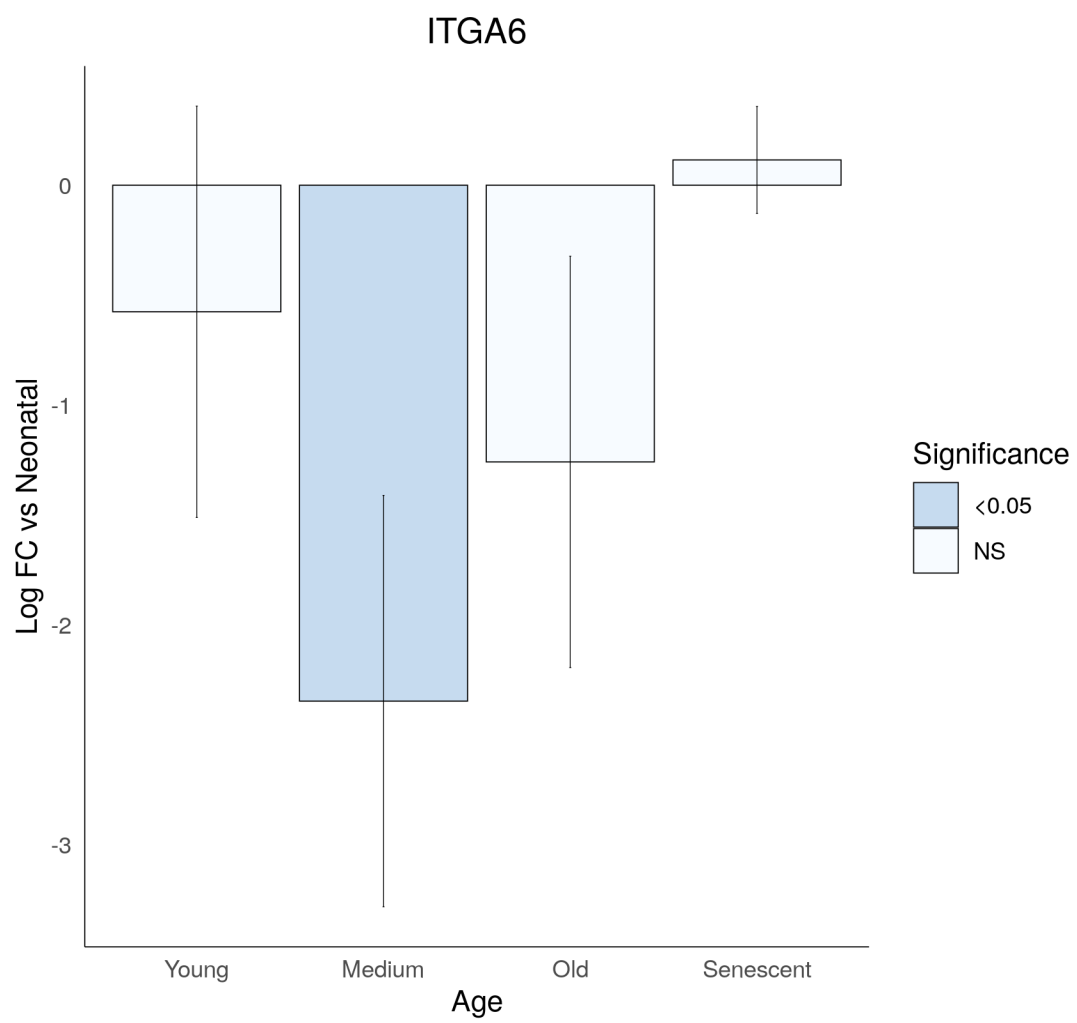

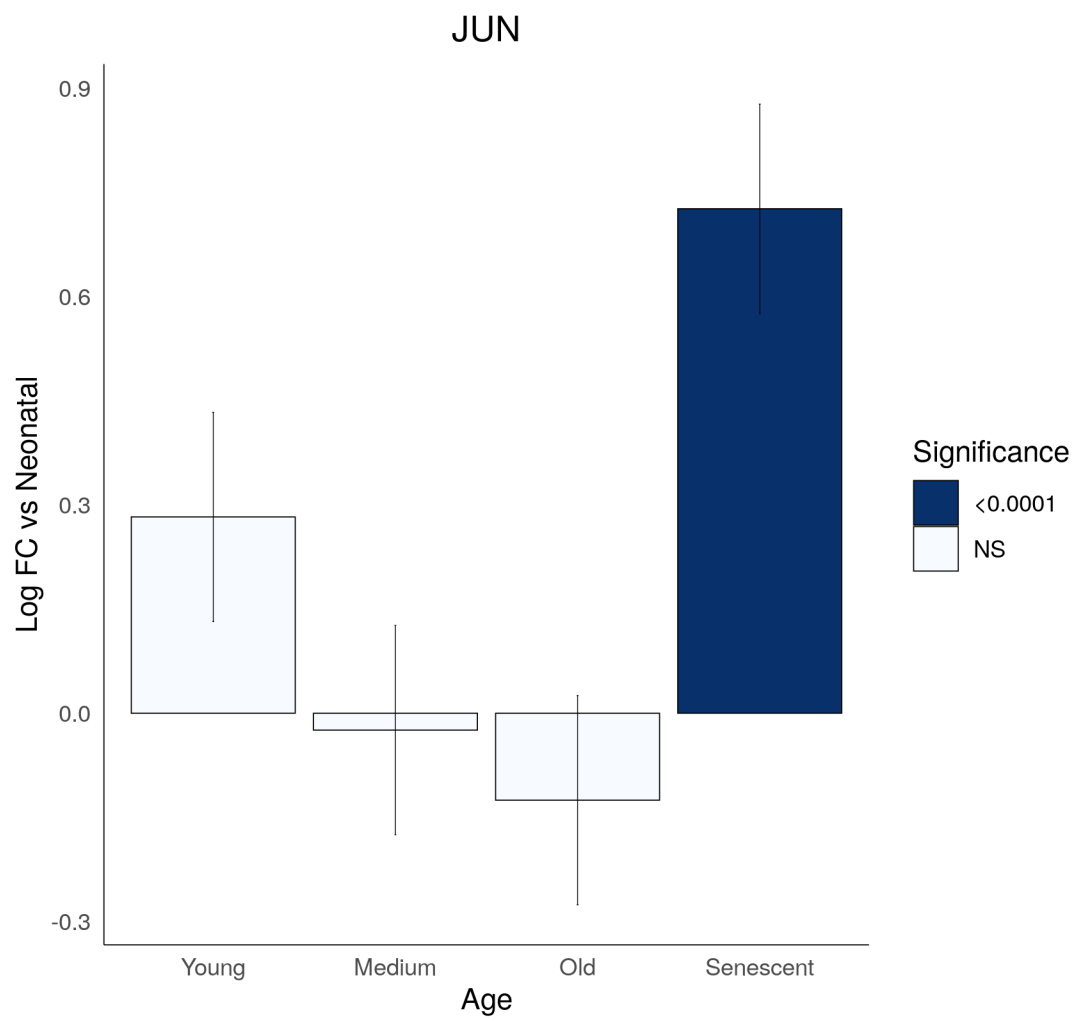



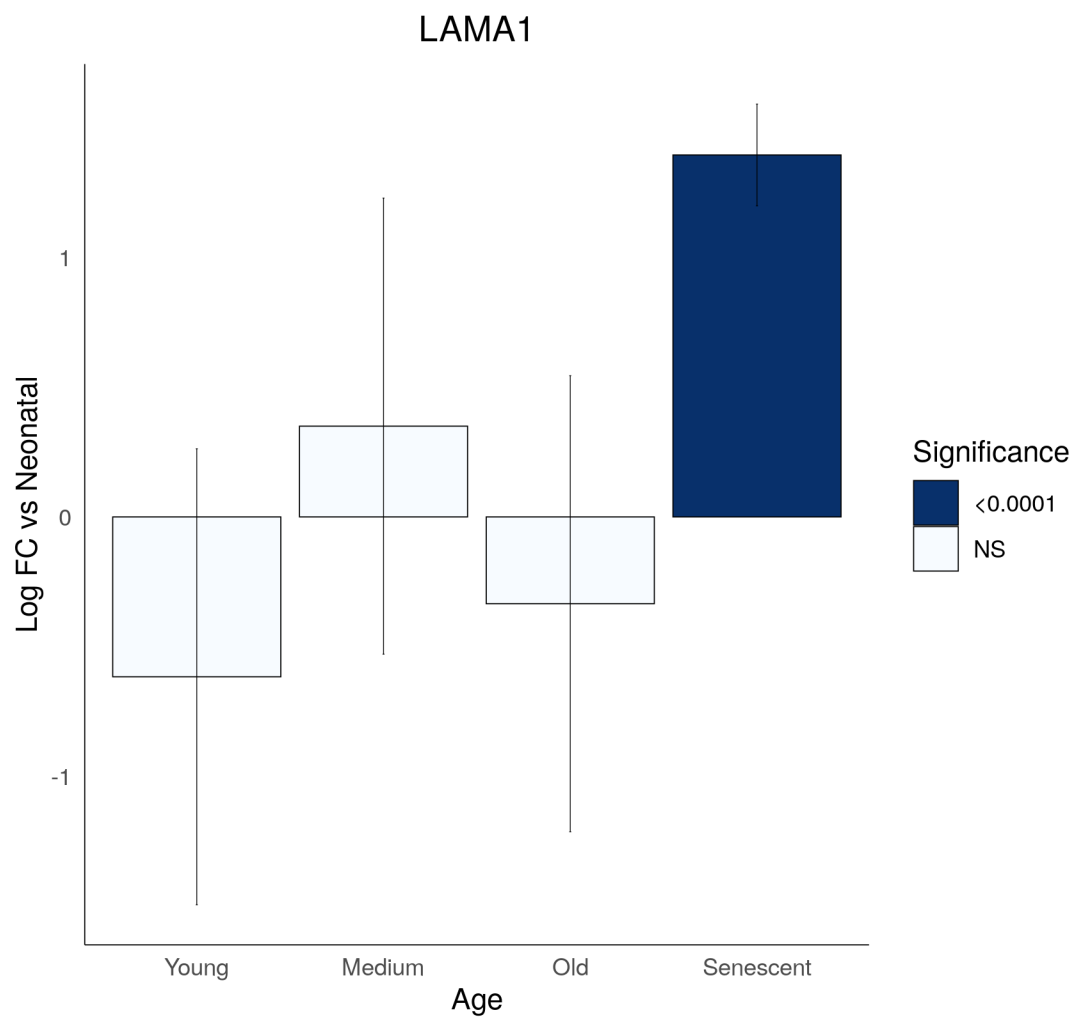

# LAMA3

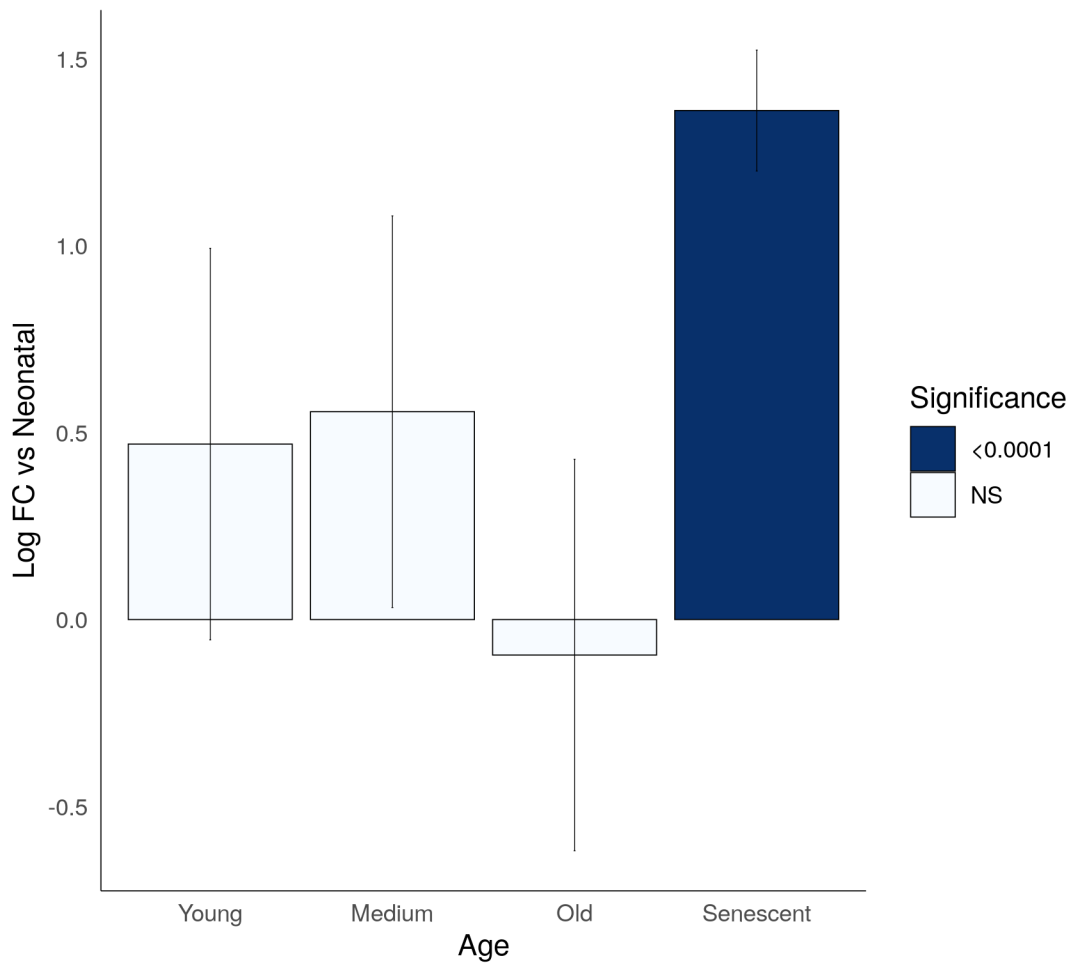

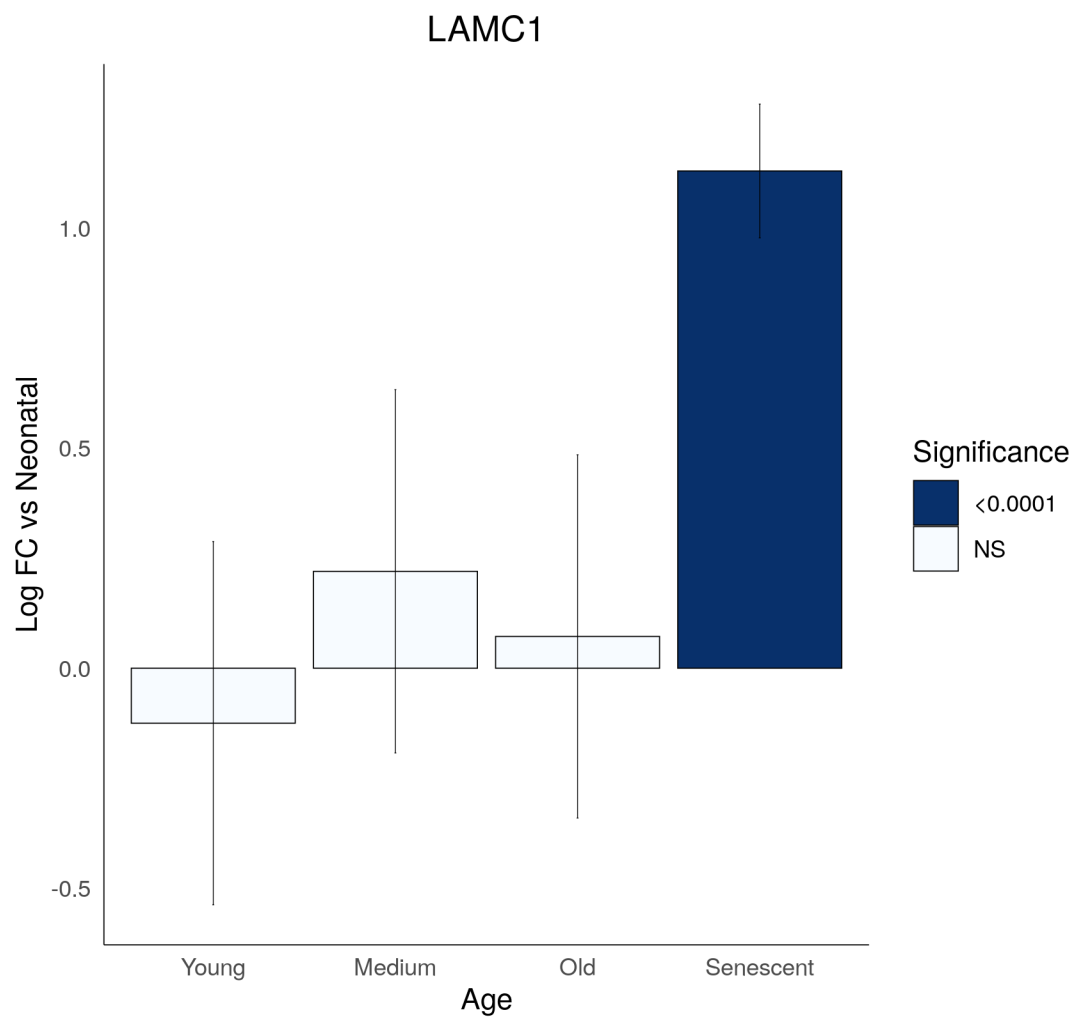

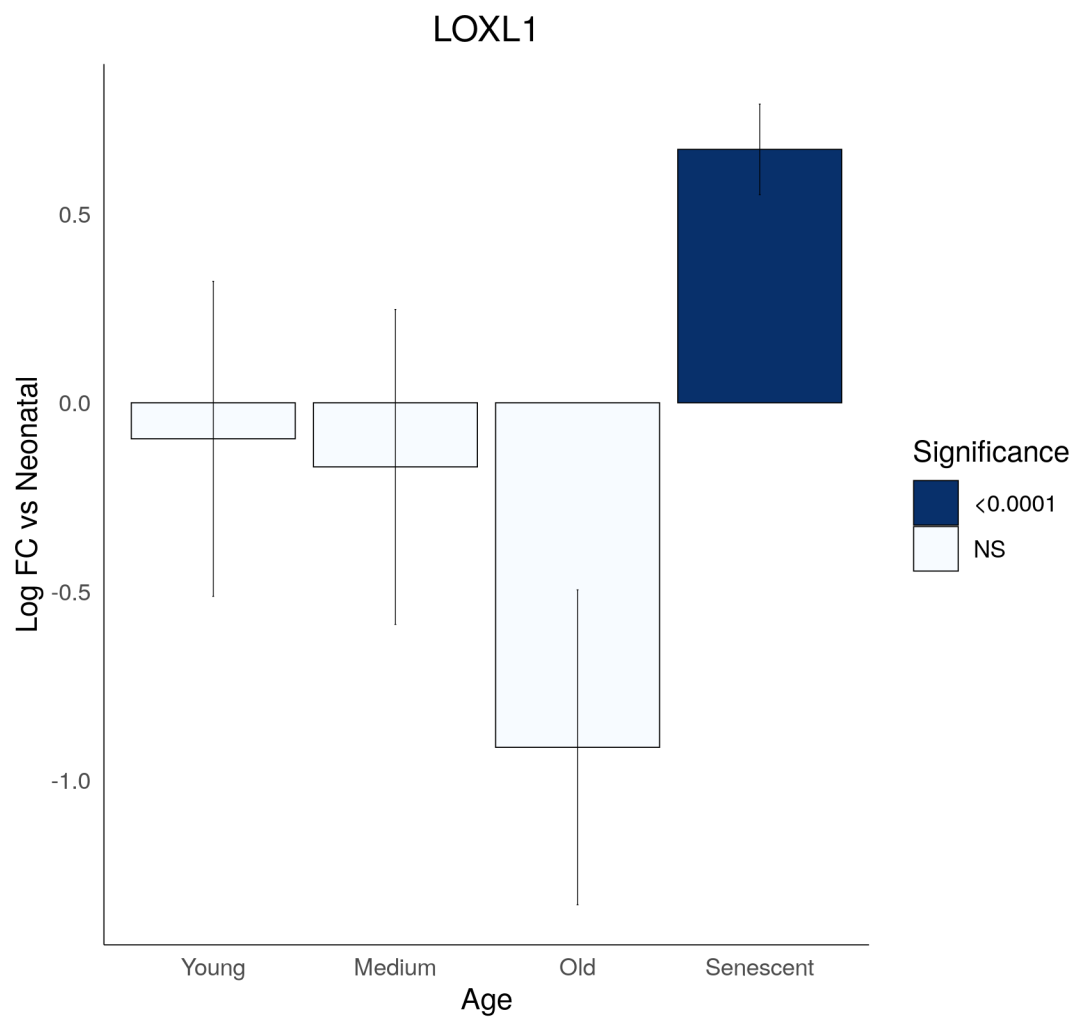

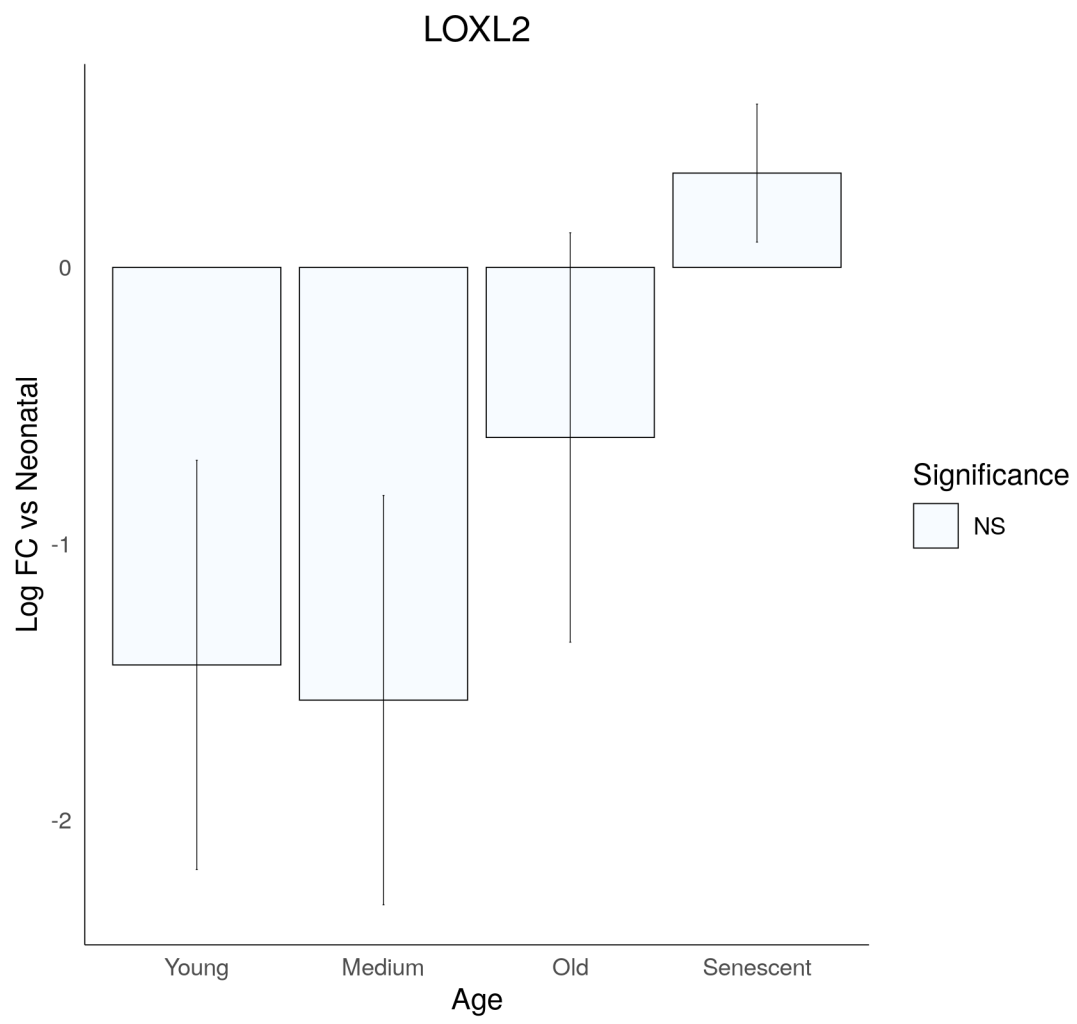

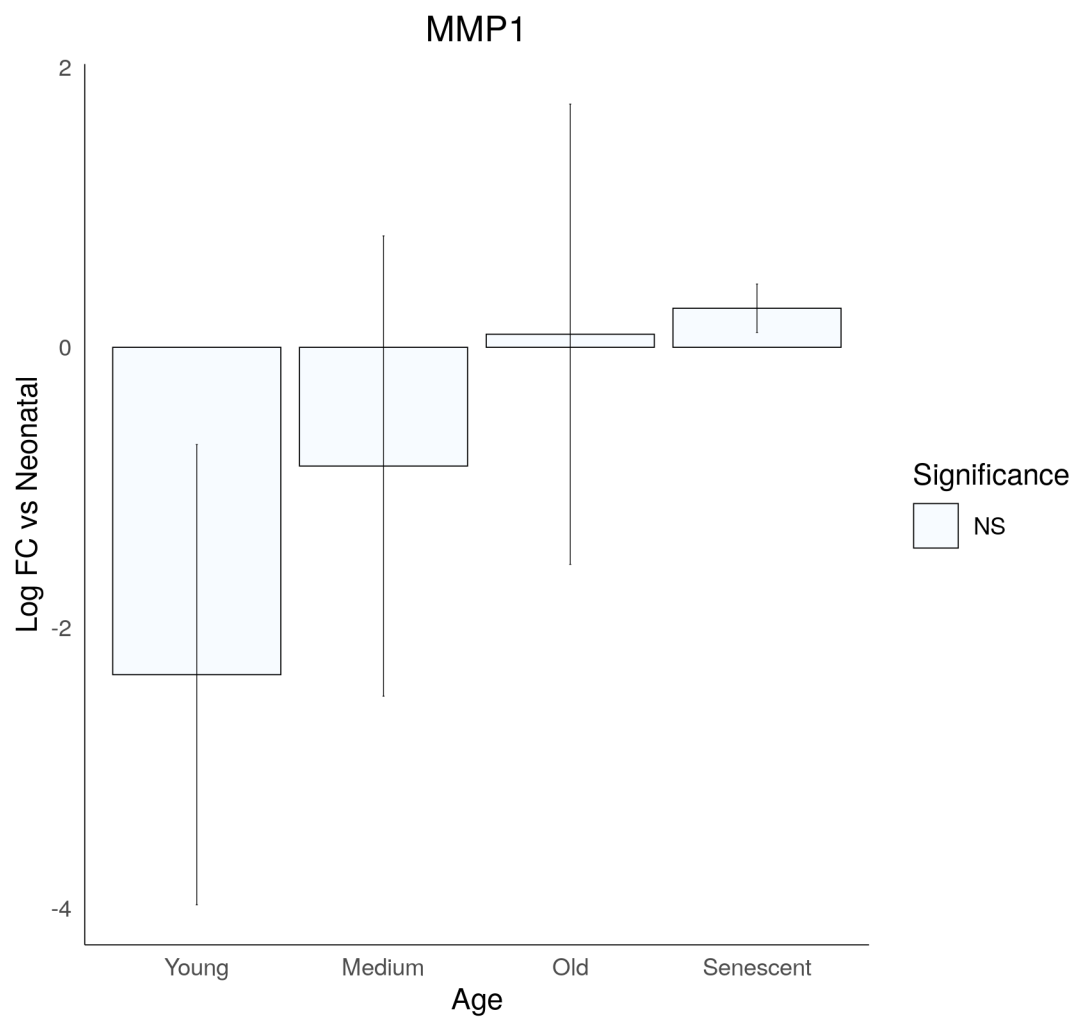

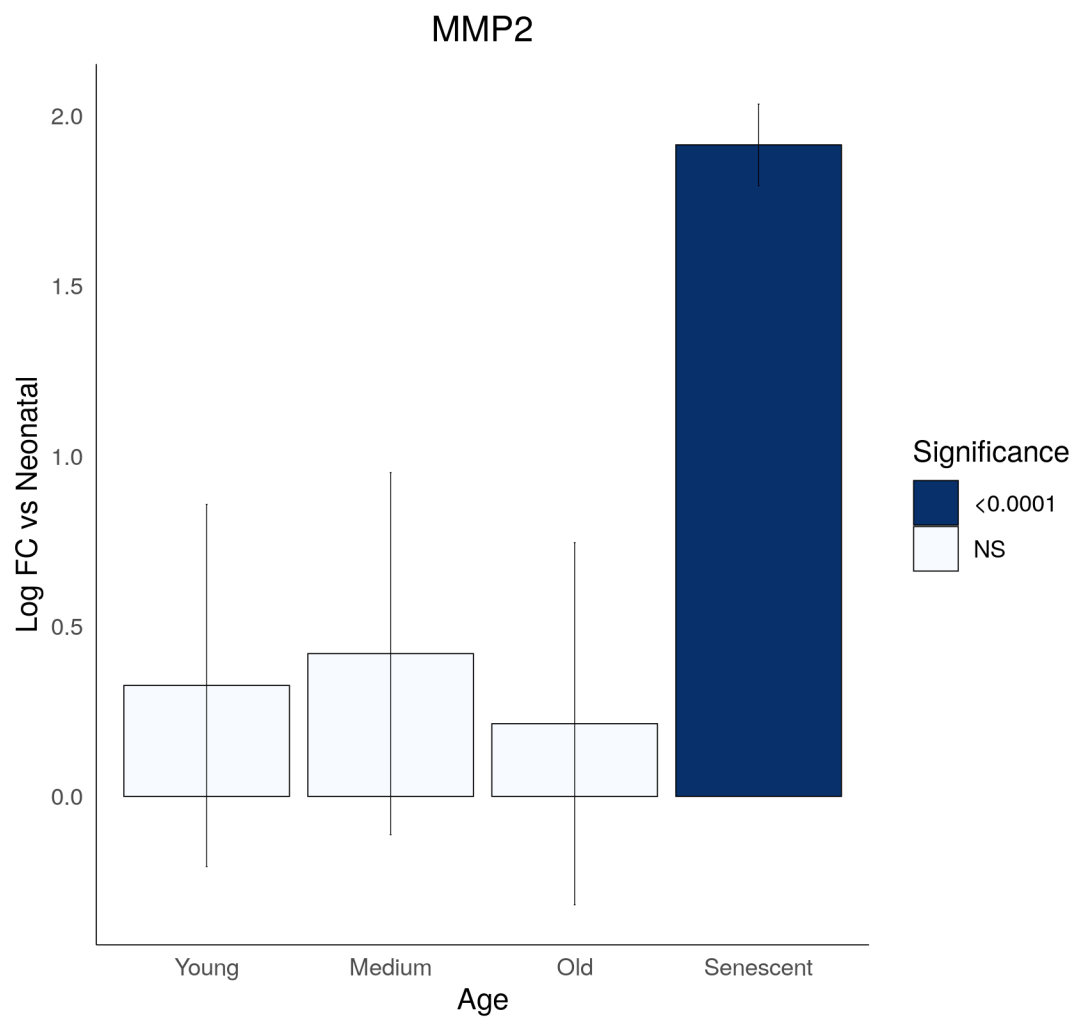

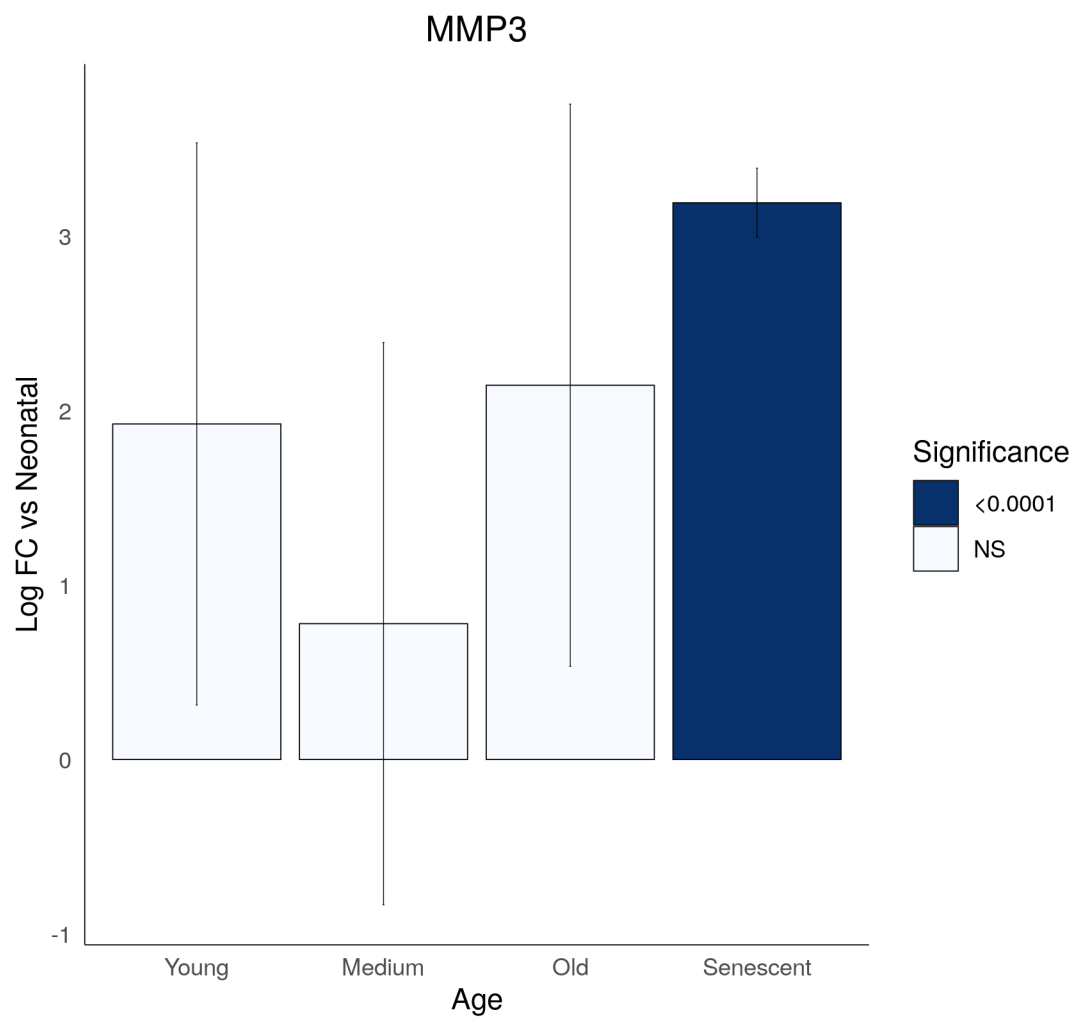



# MMP9

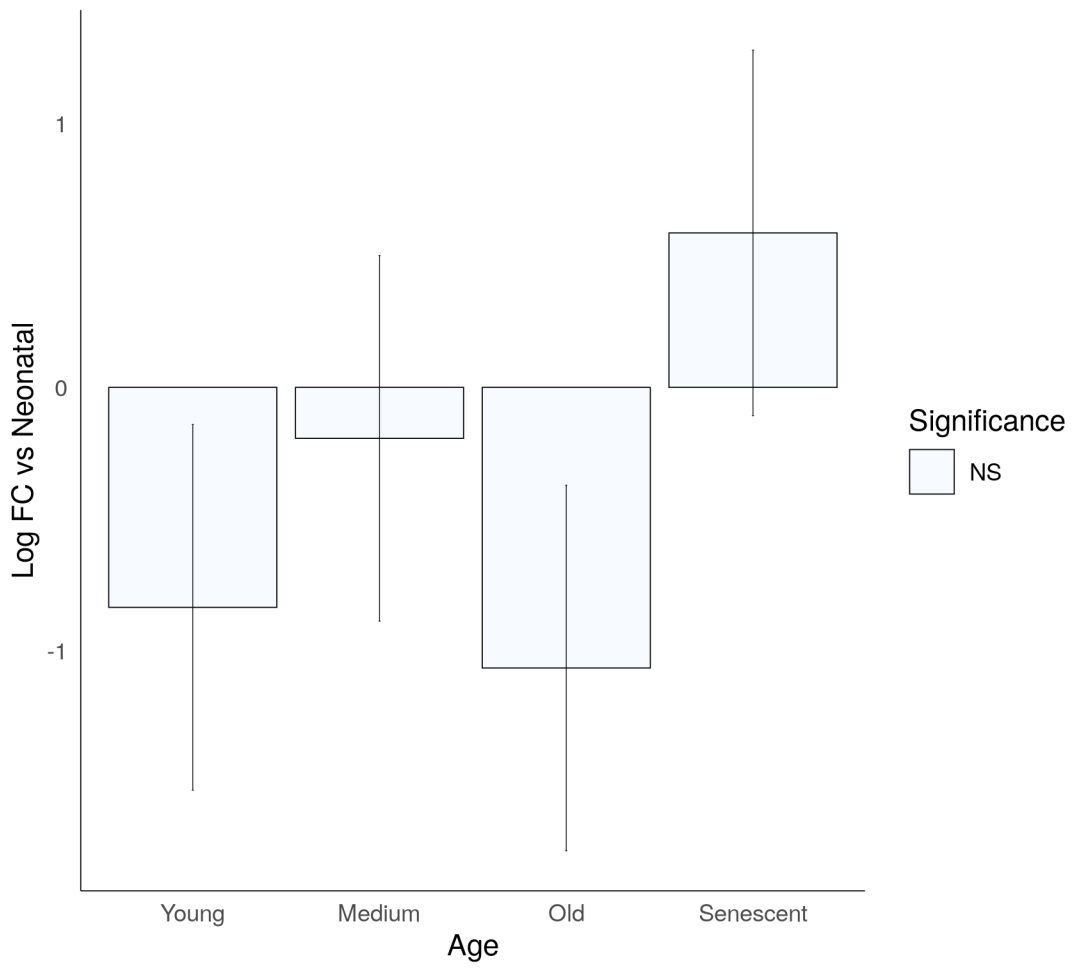

# MMP14

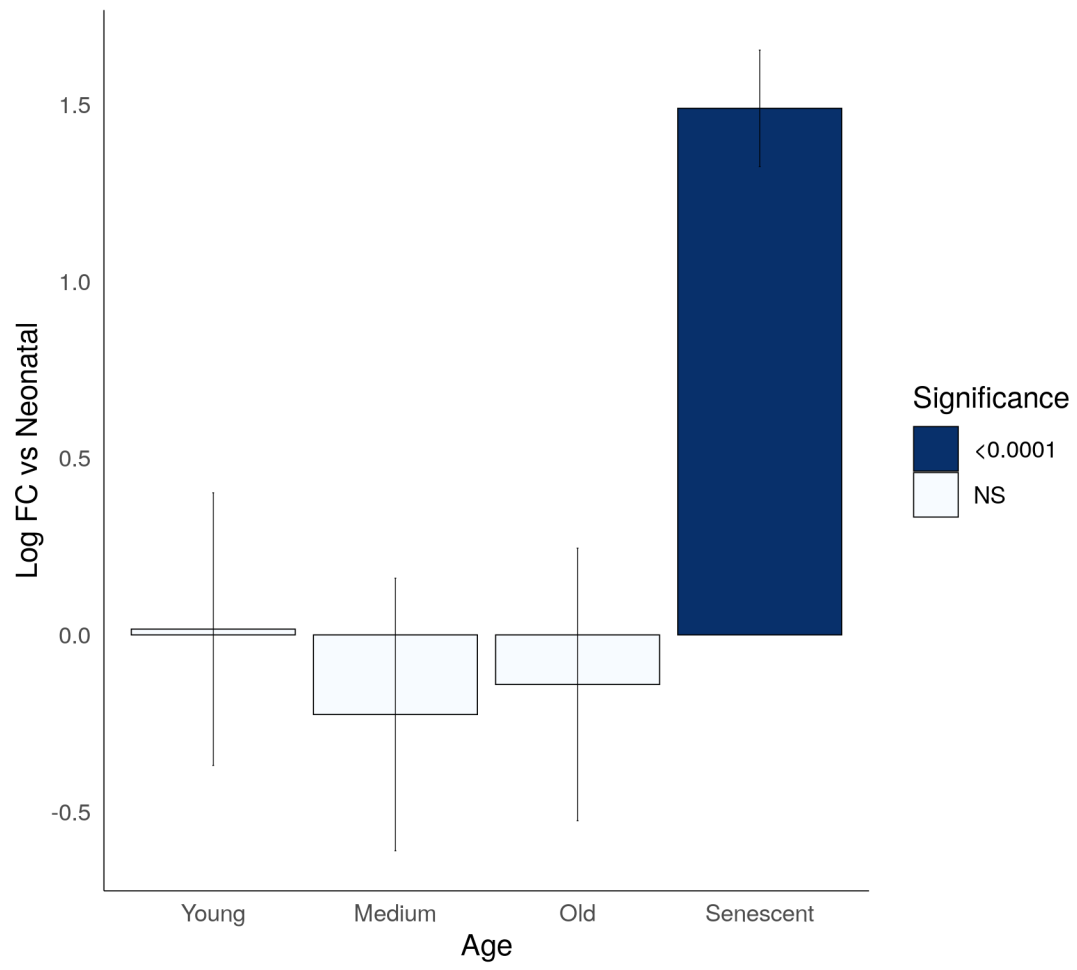

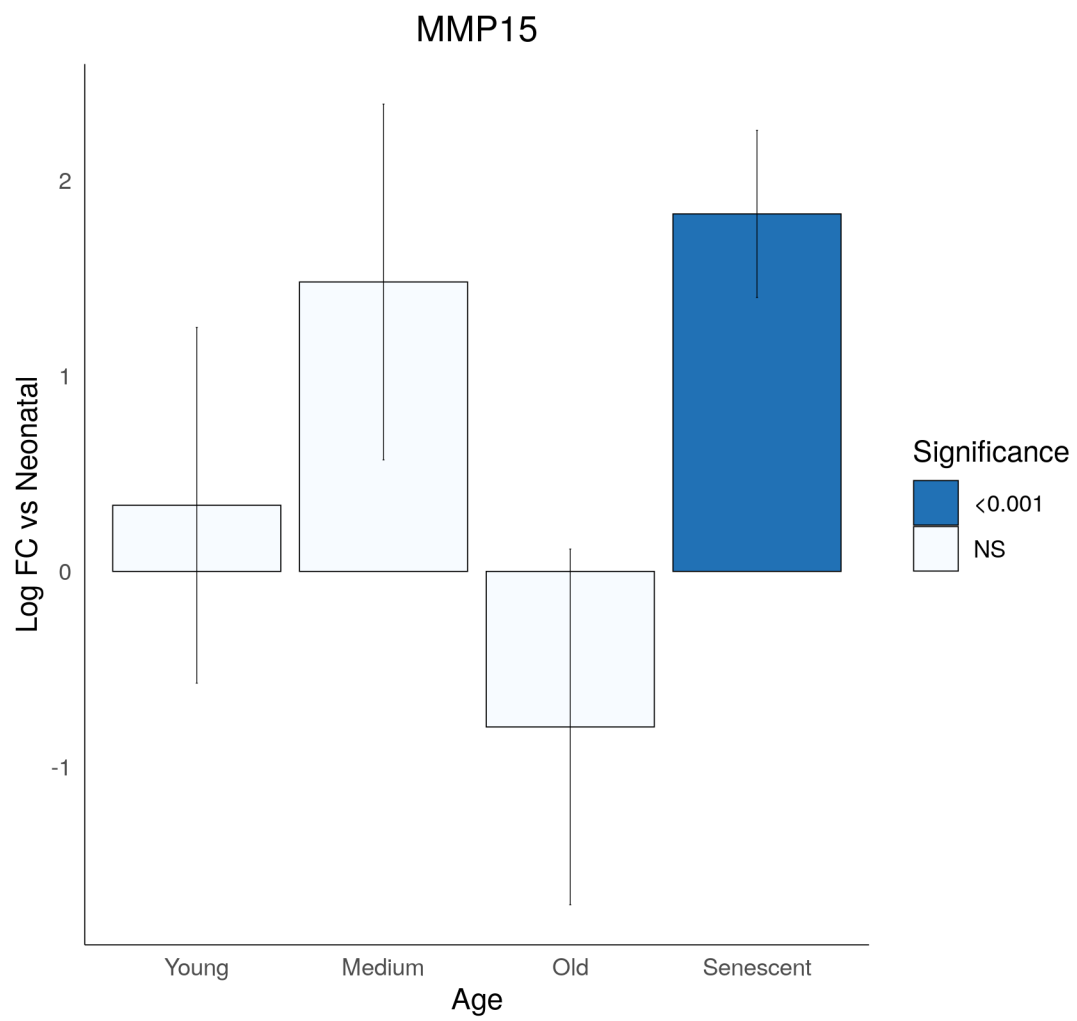

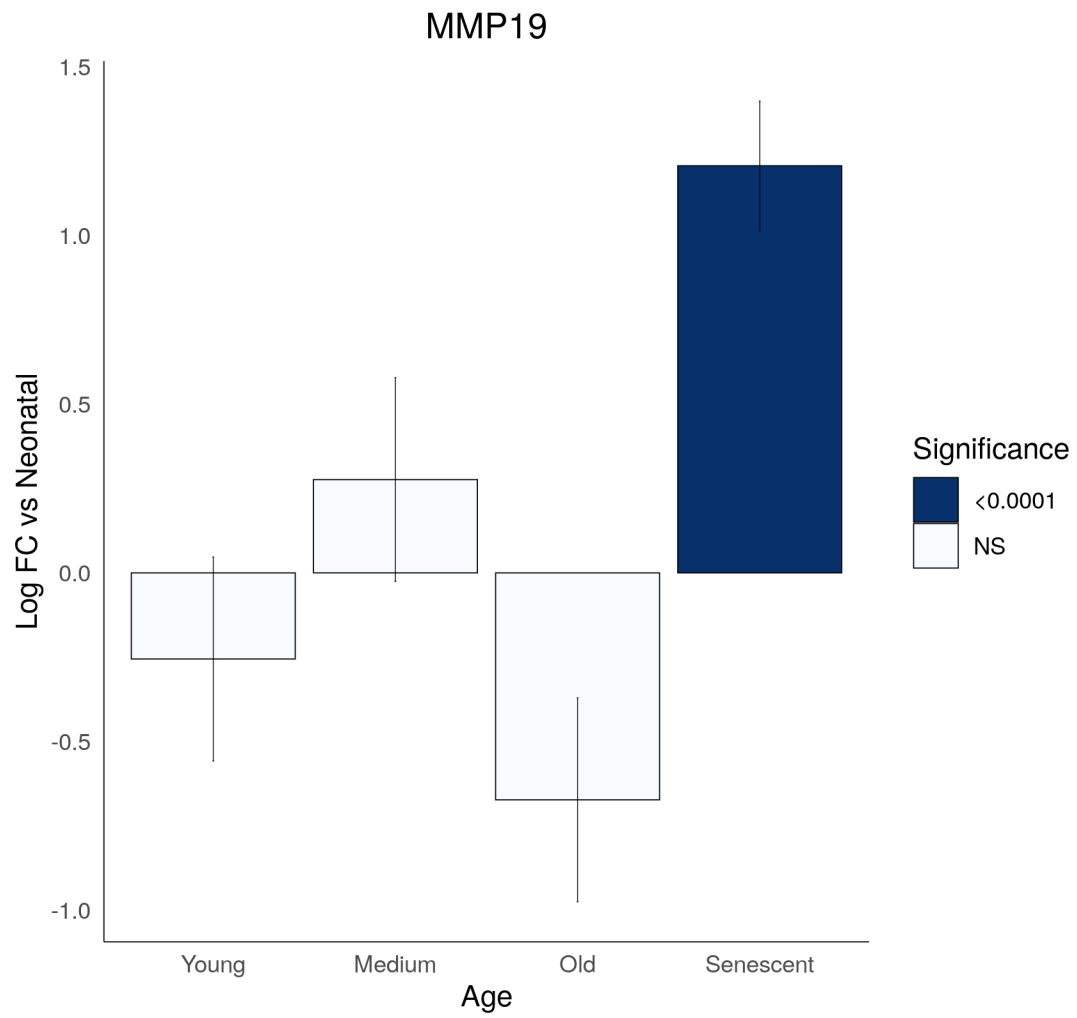

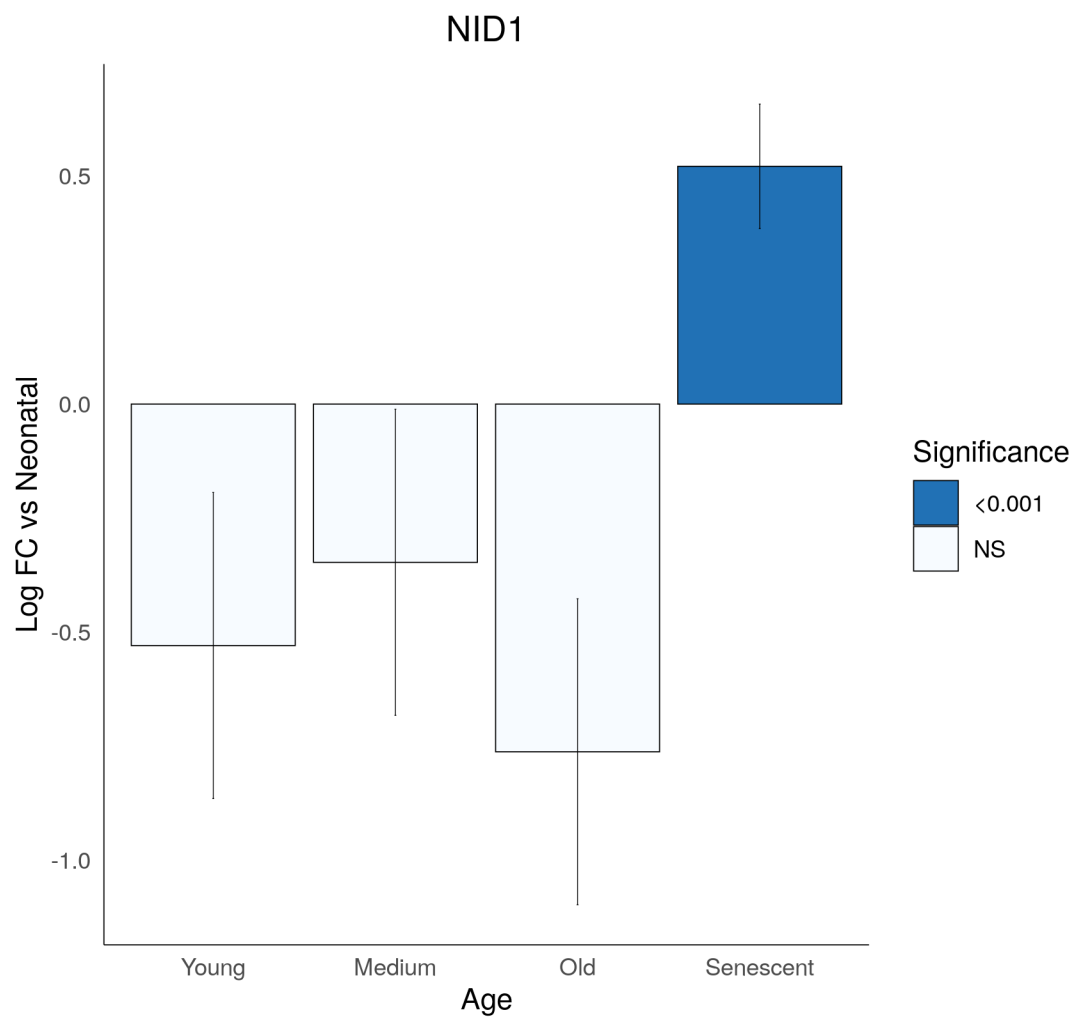

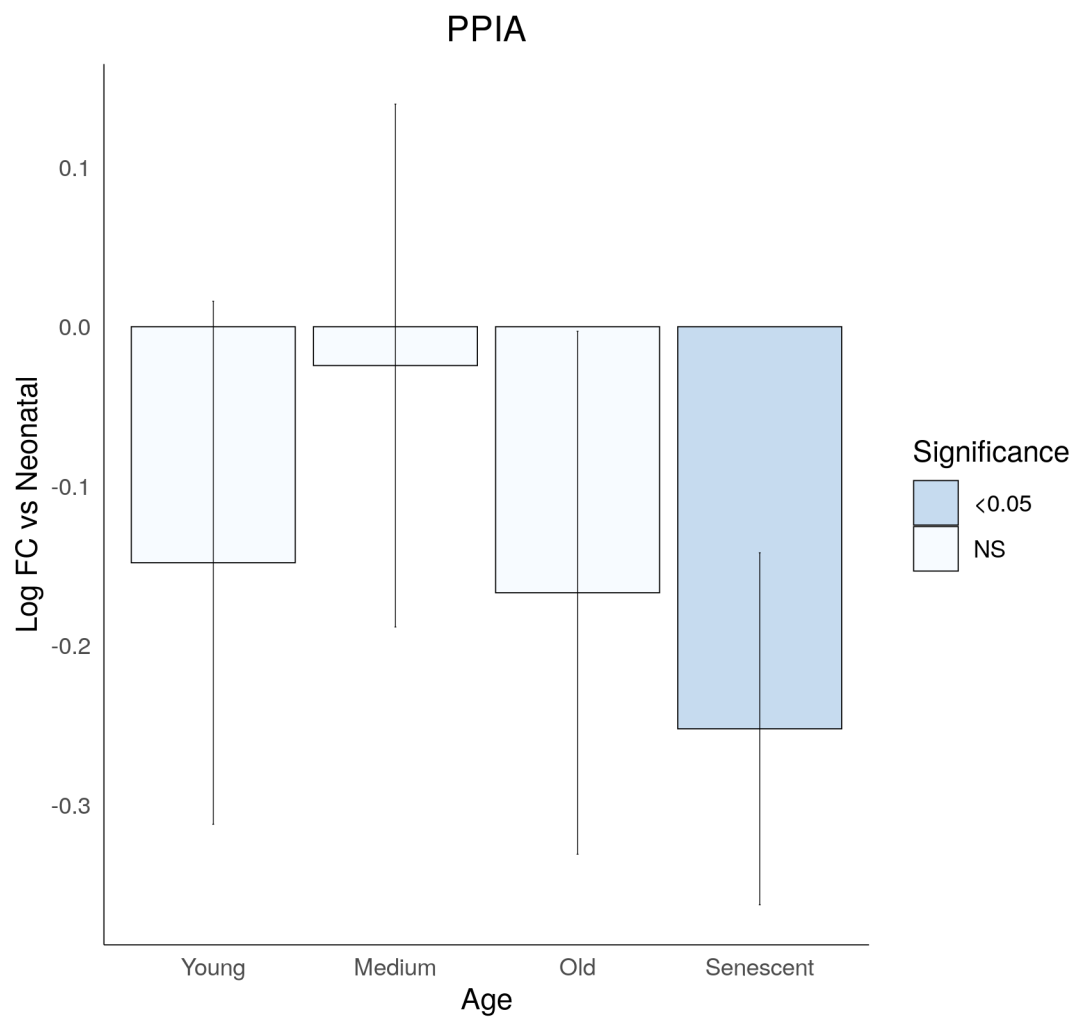

PTGER3

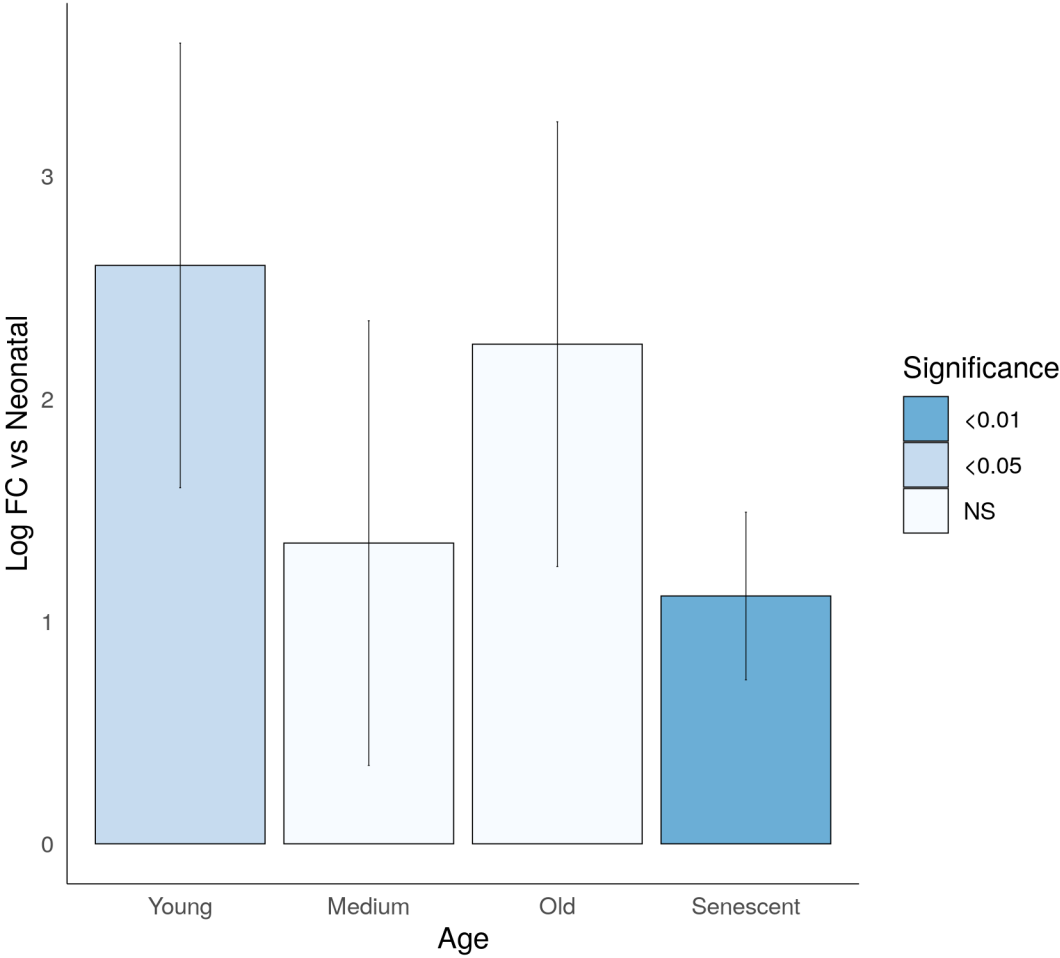

SERPINE1

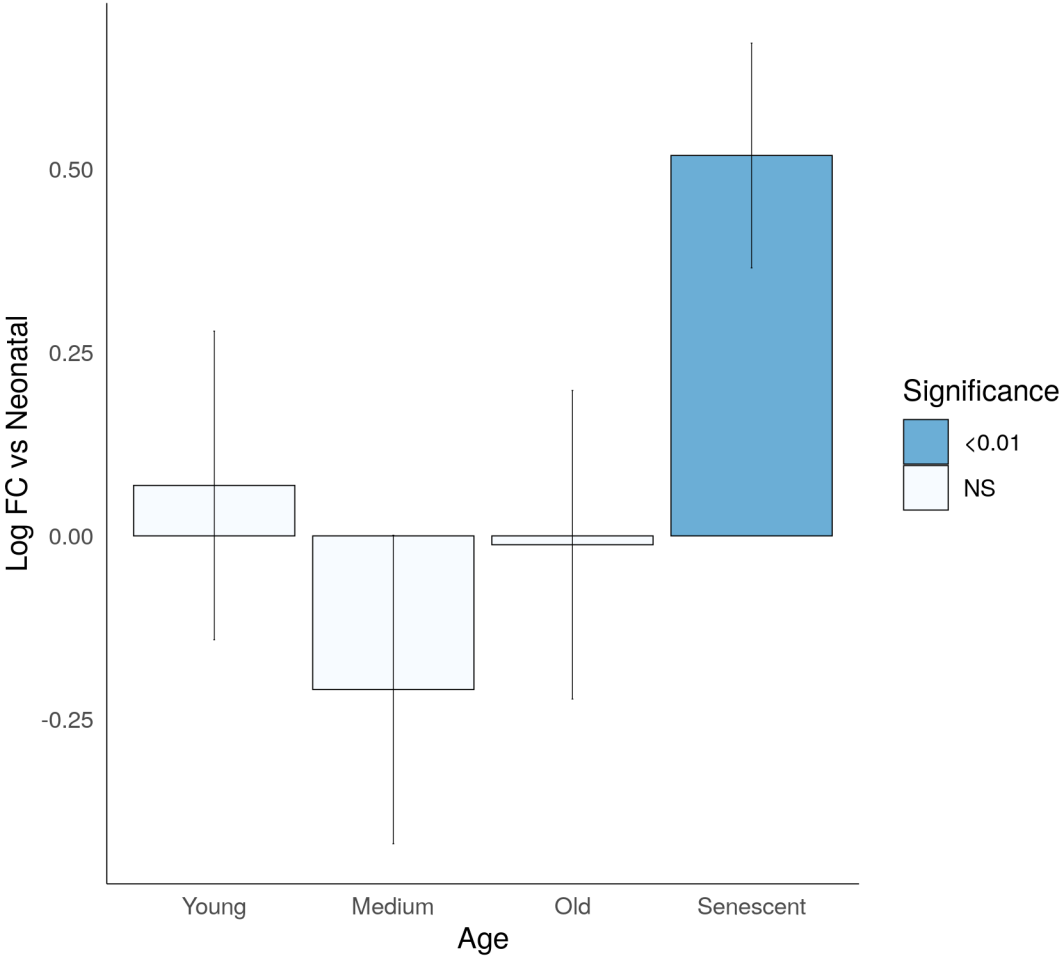



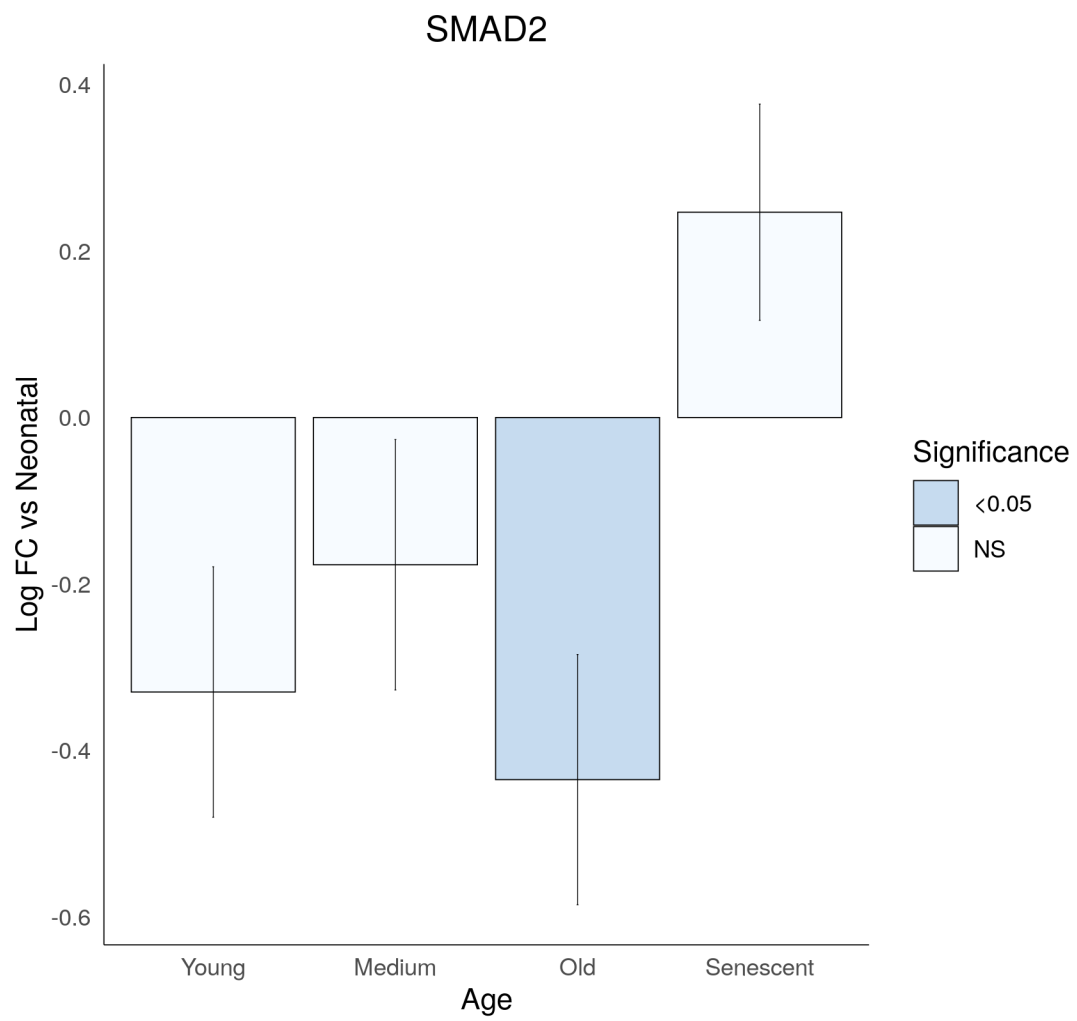

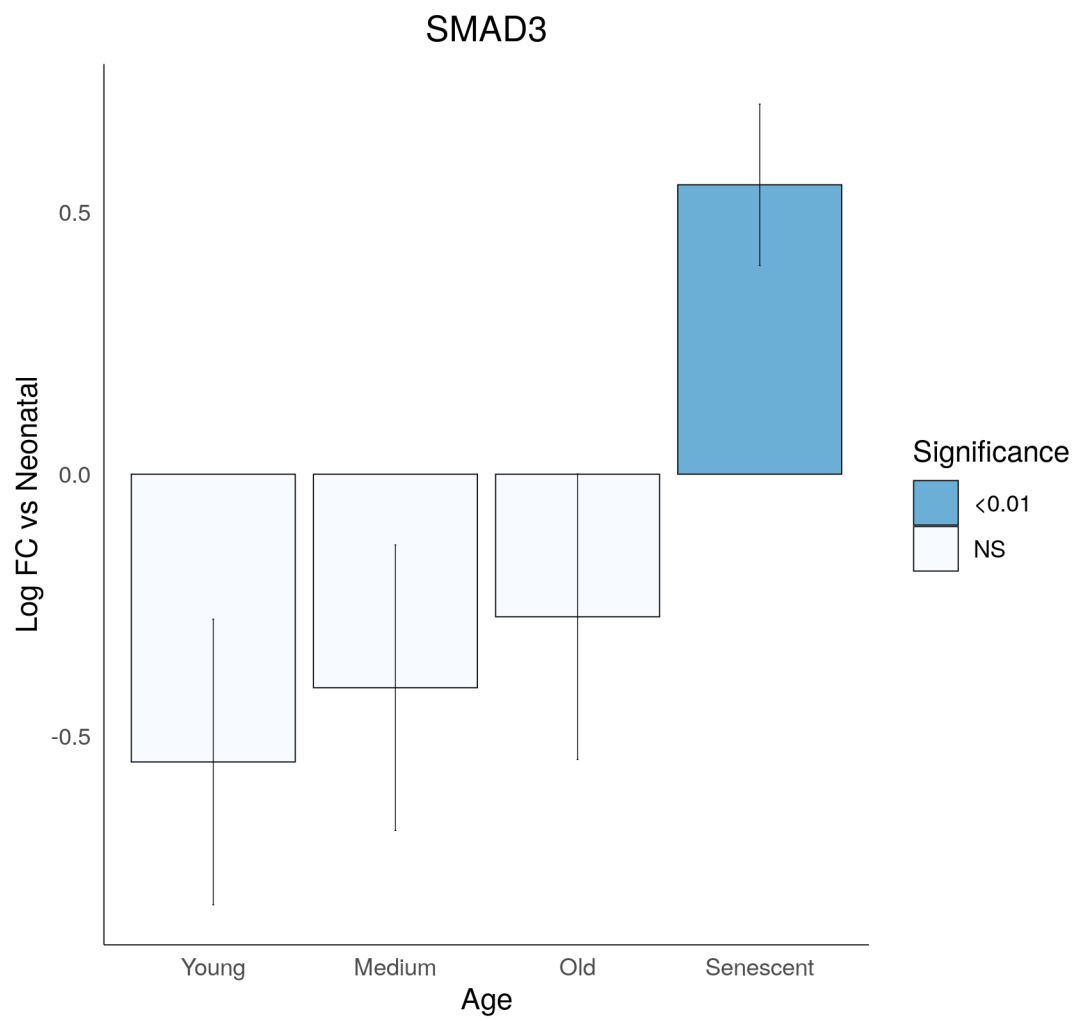

# SMAD4

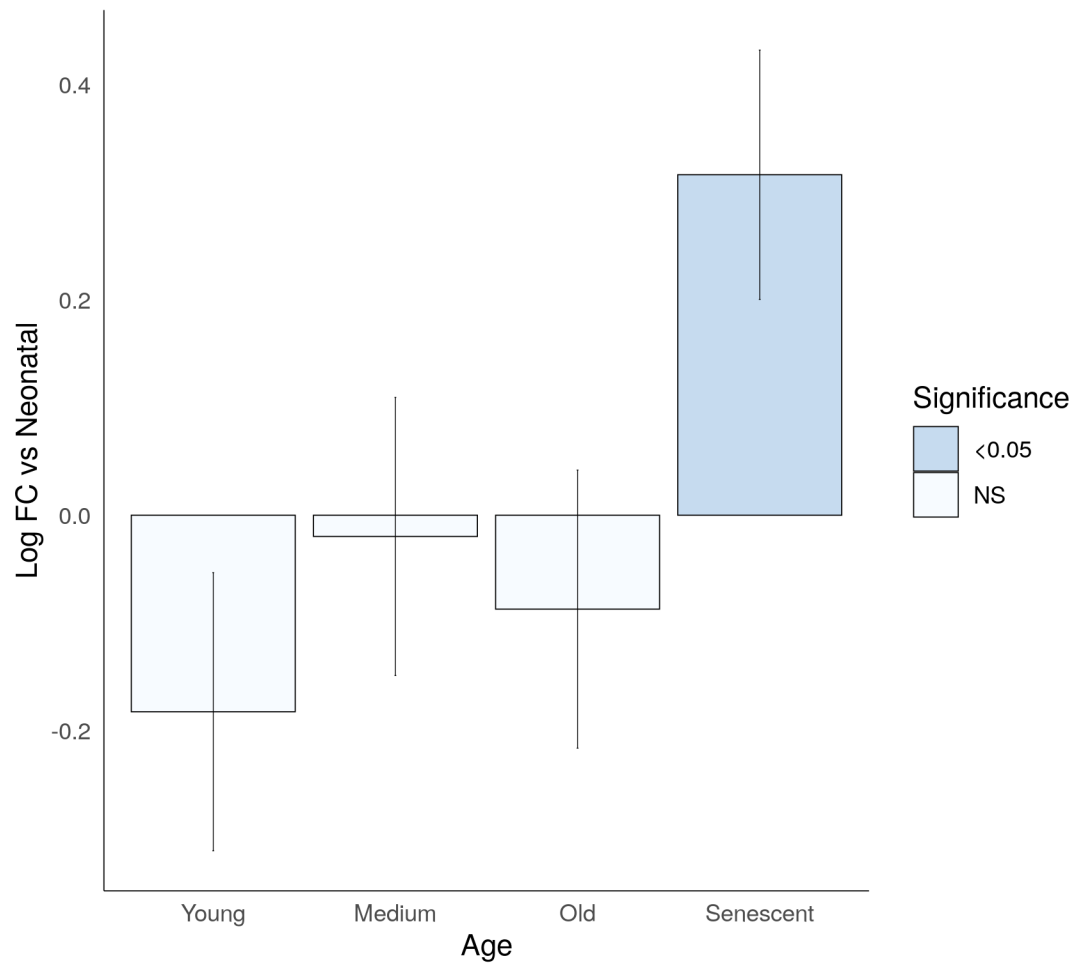

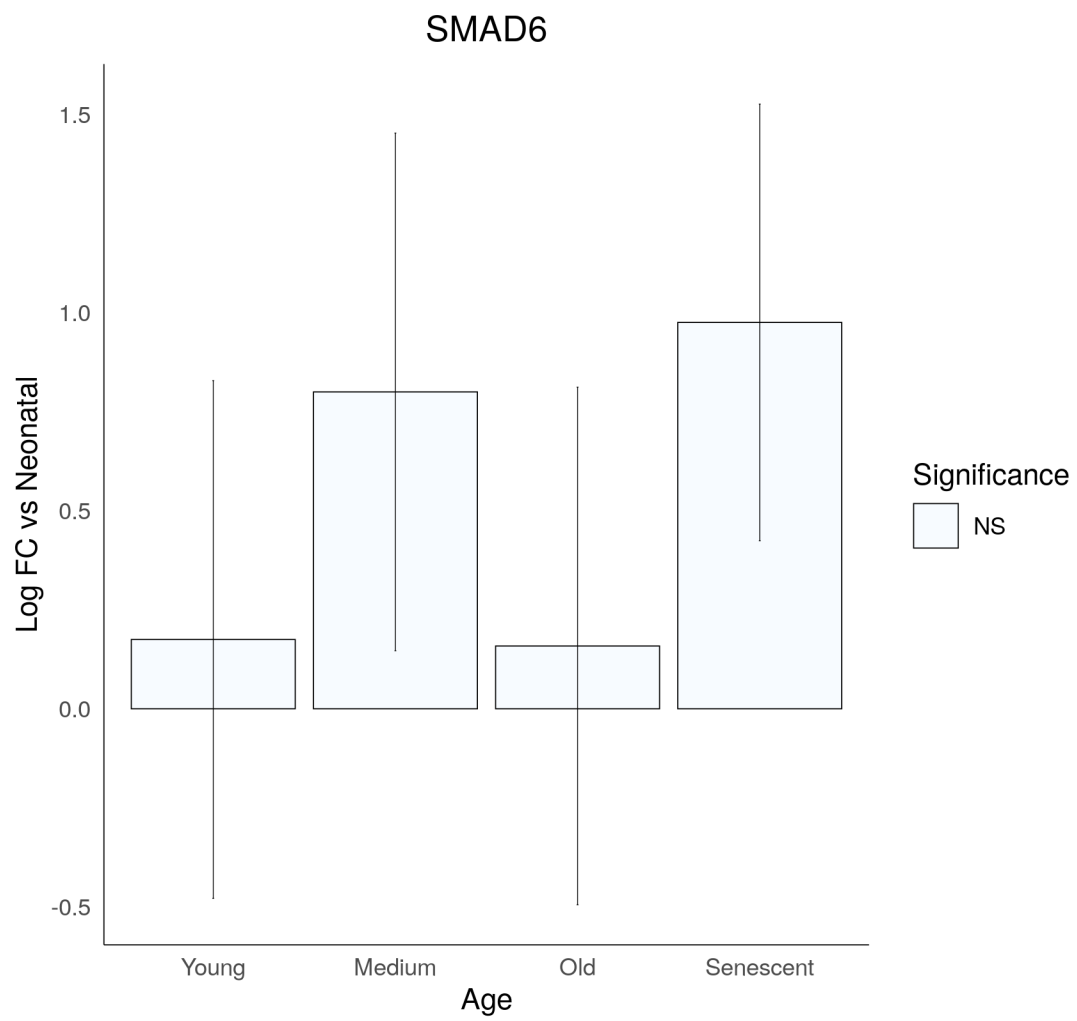

## SMAD7

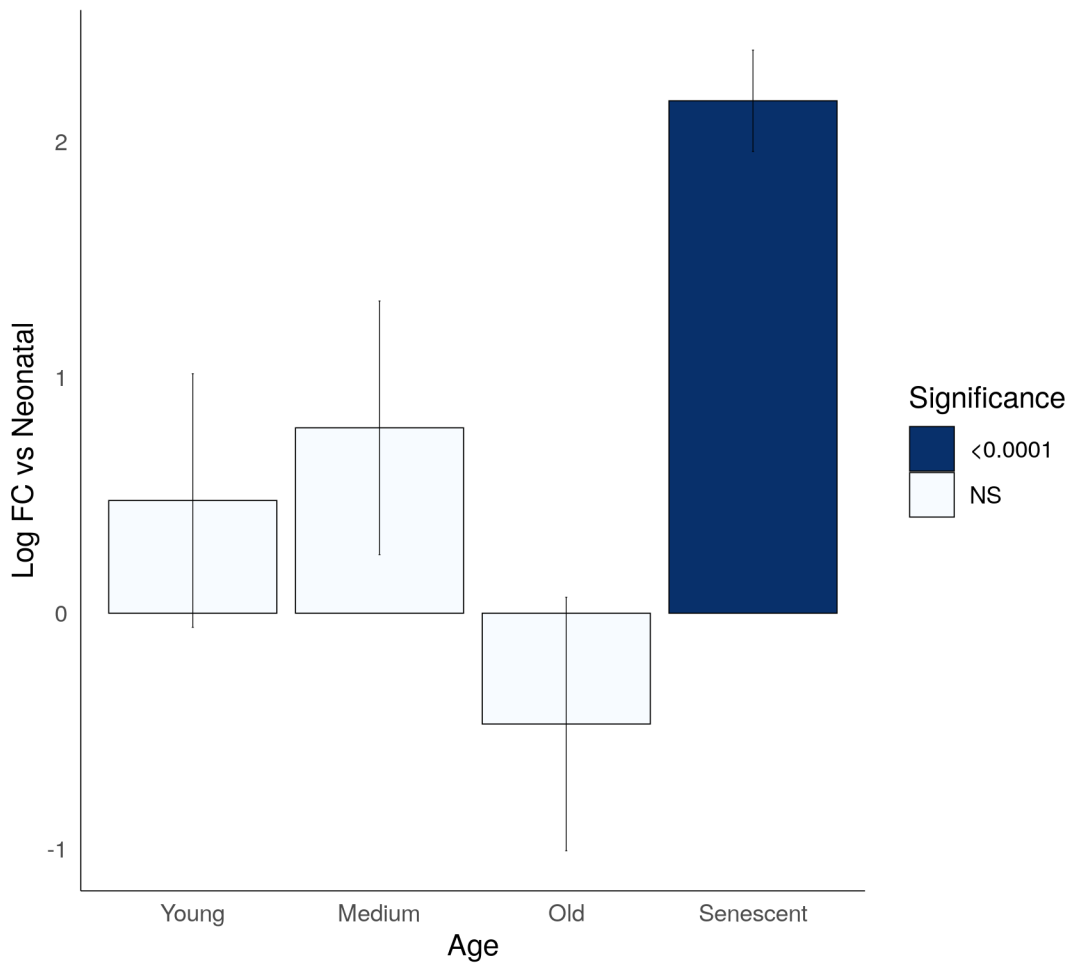

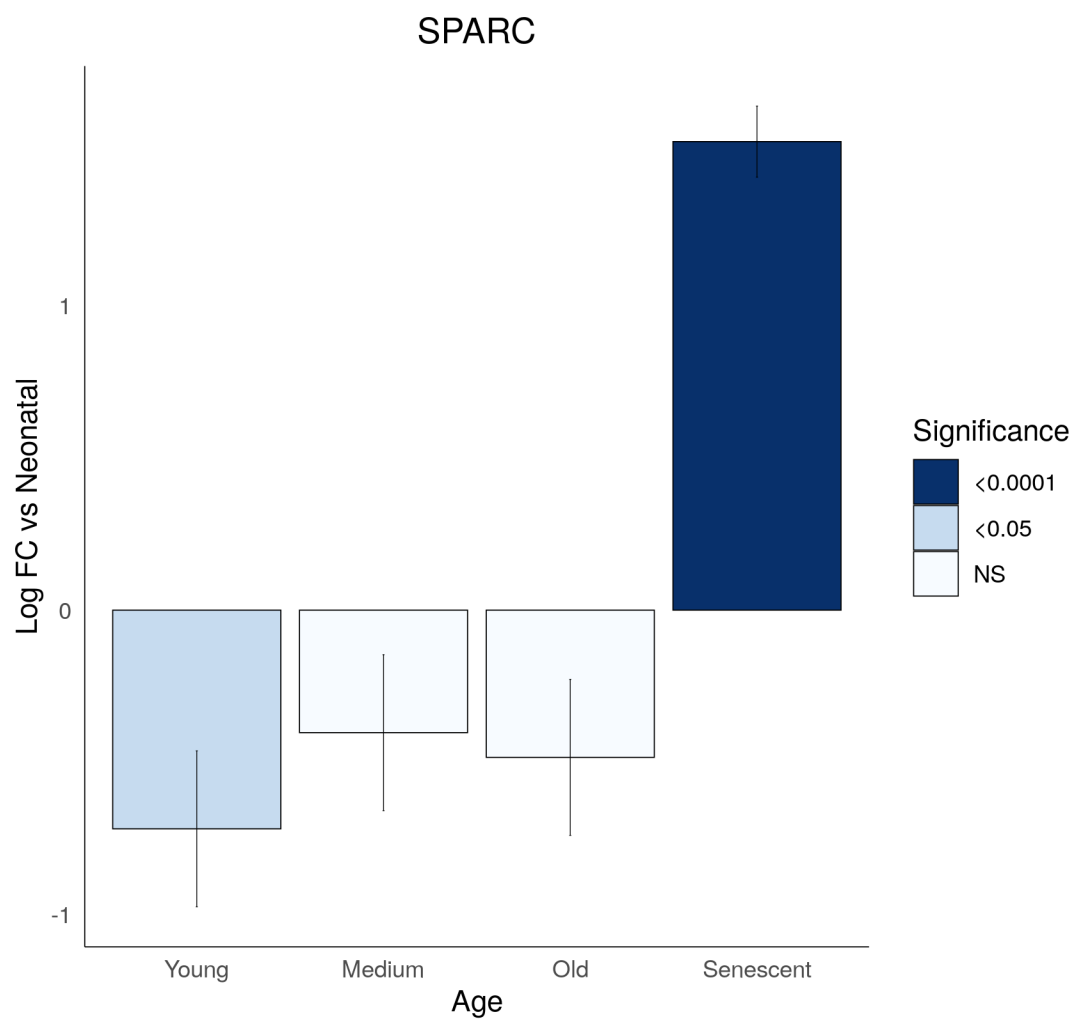

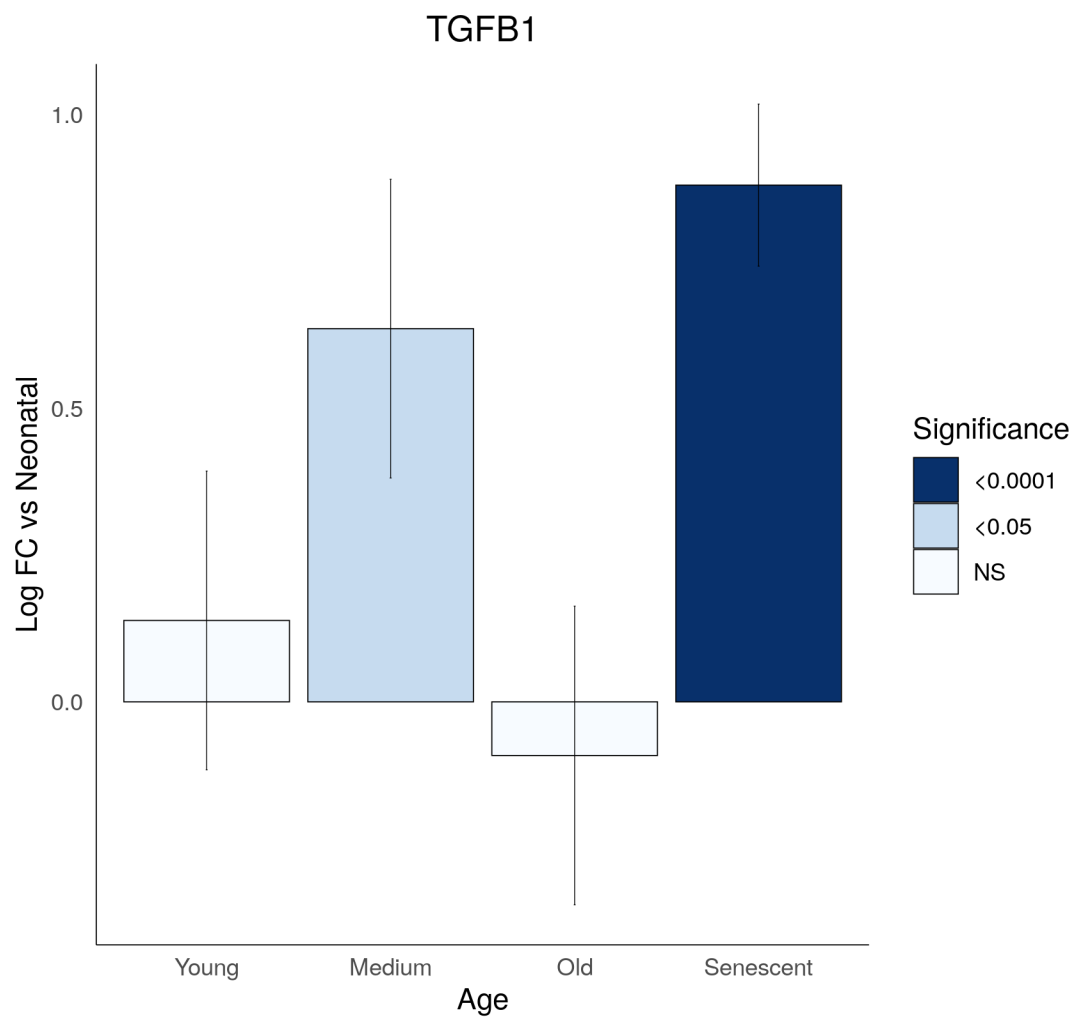

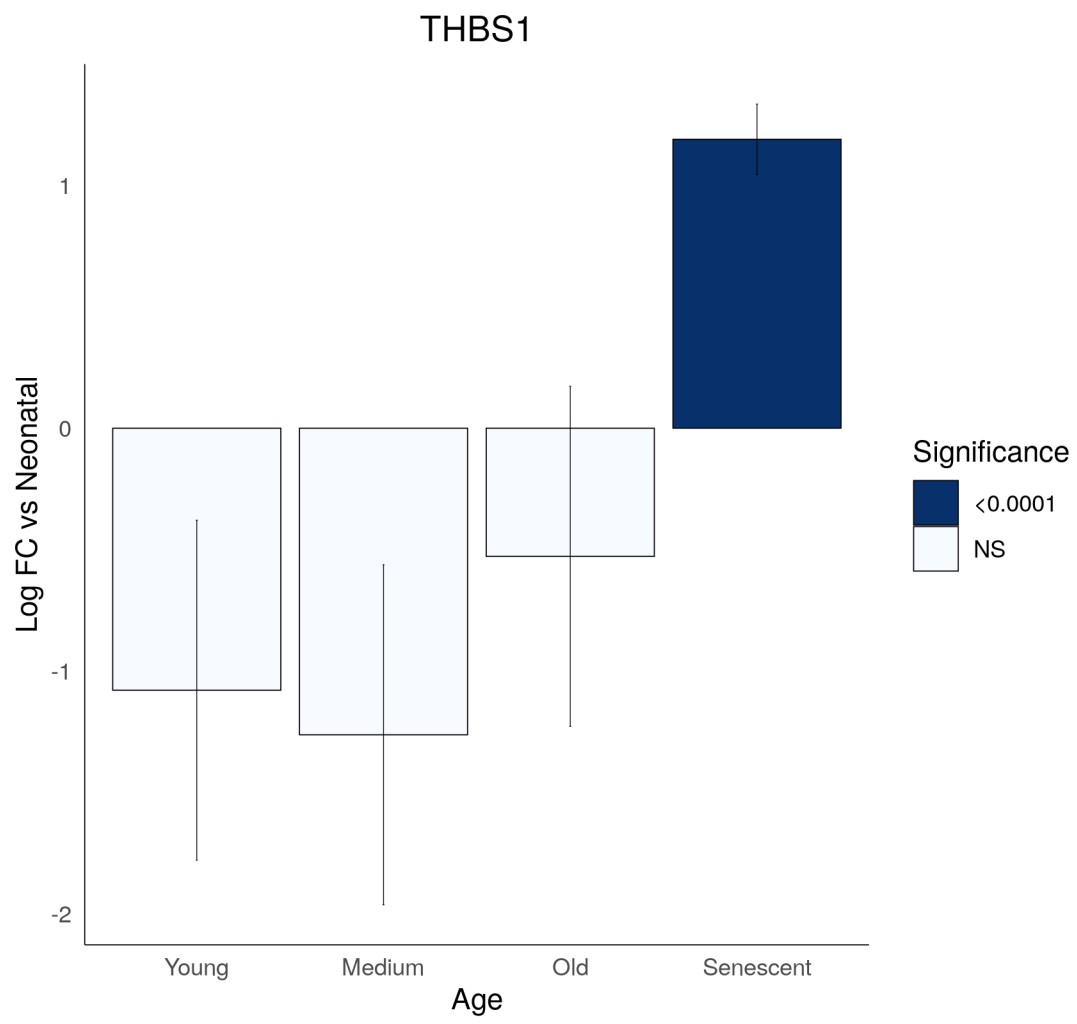



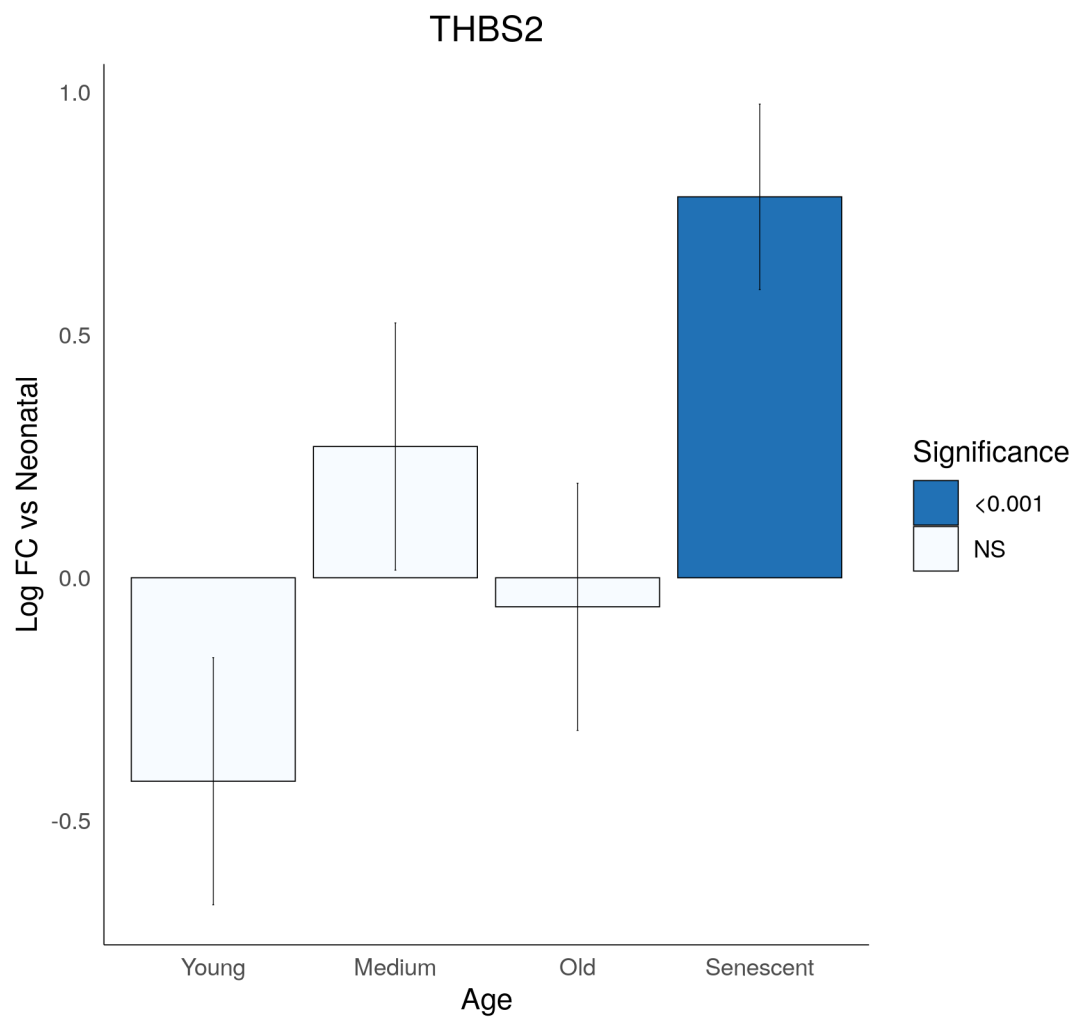

# TIMP1

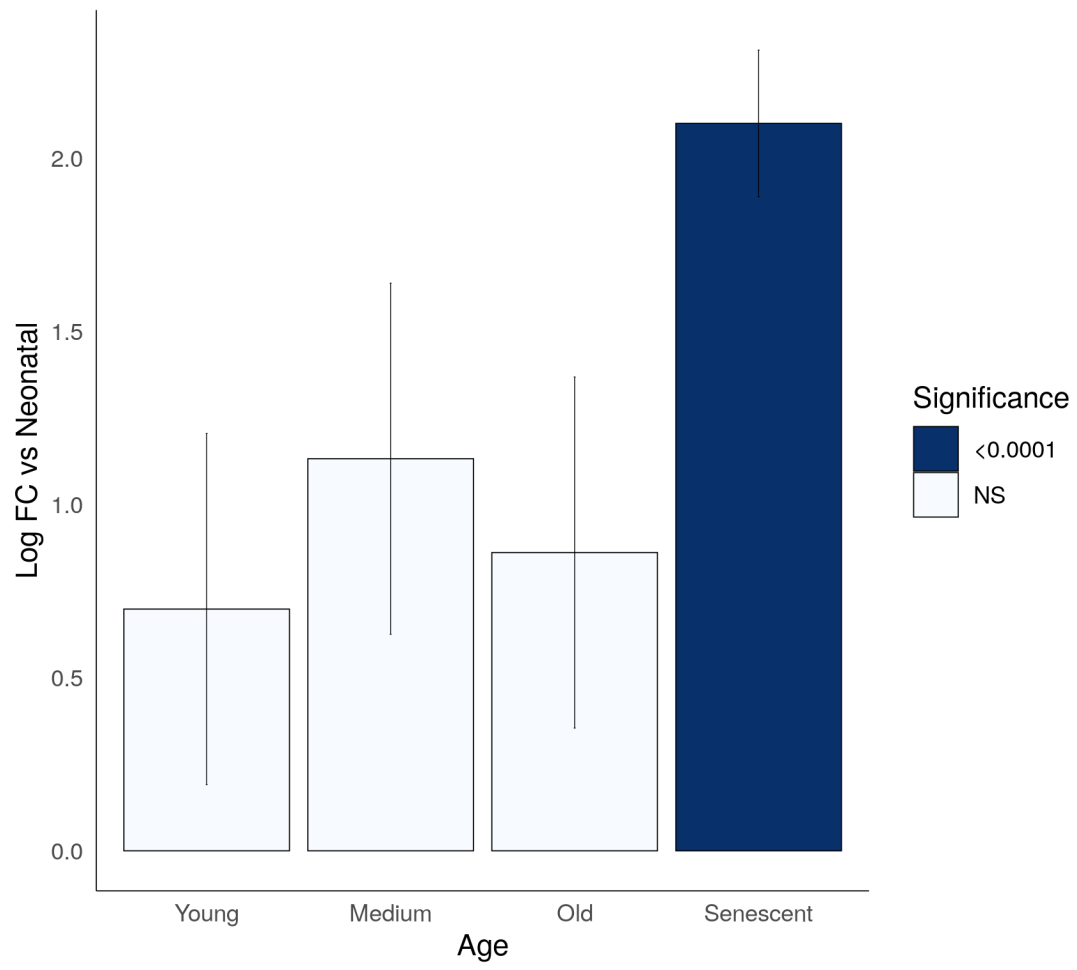

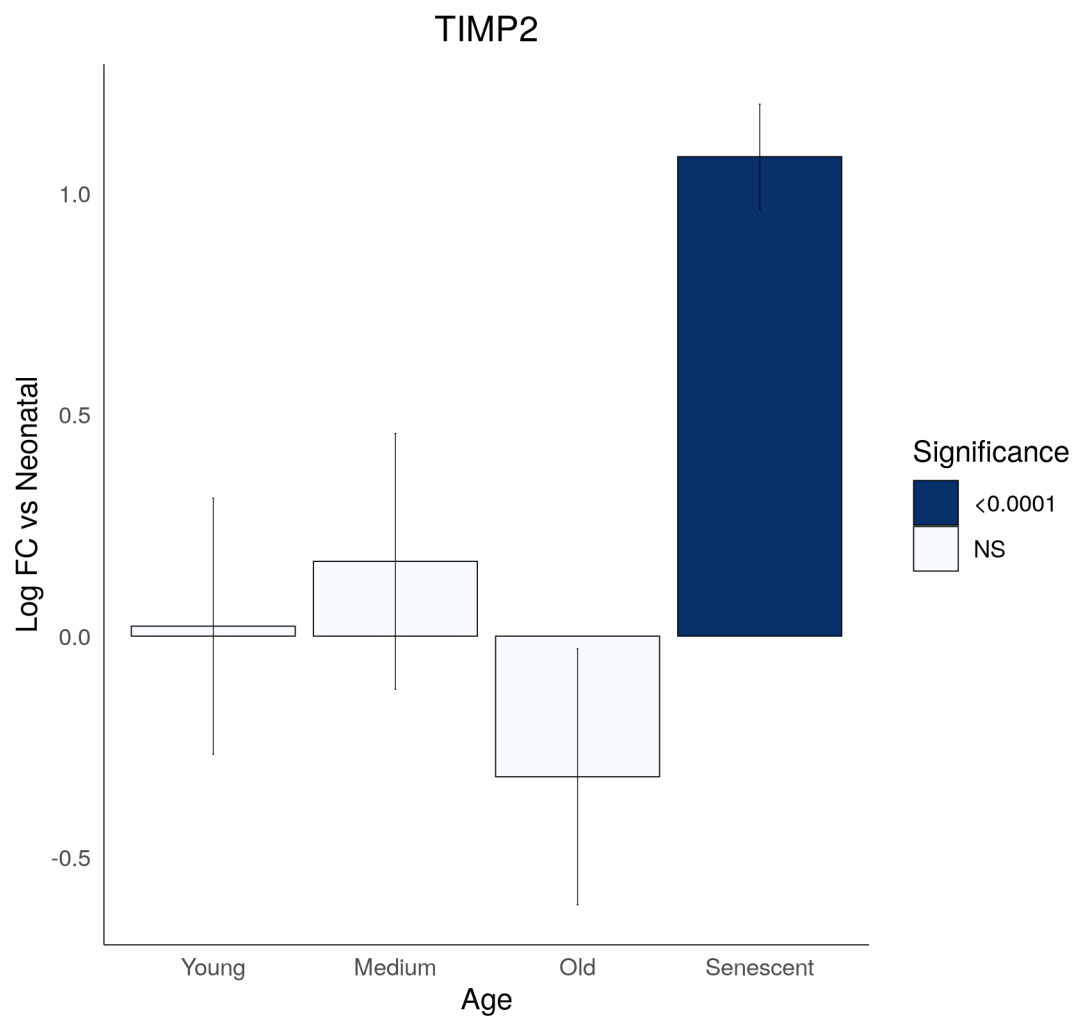

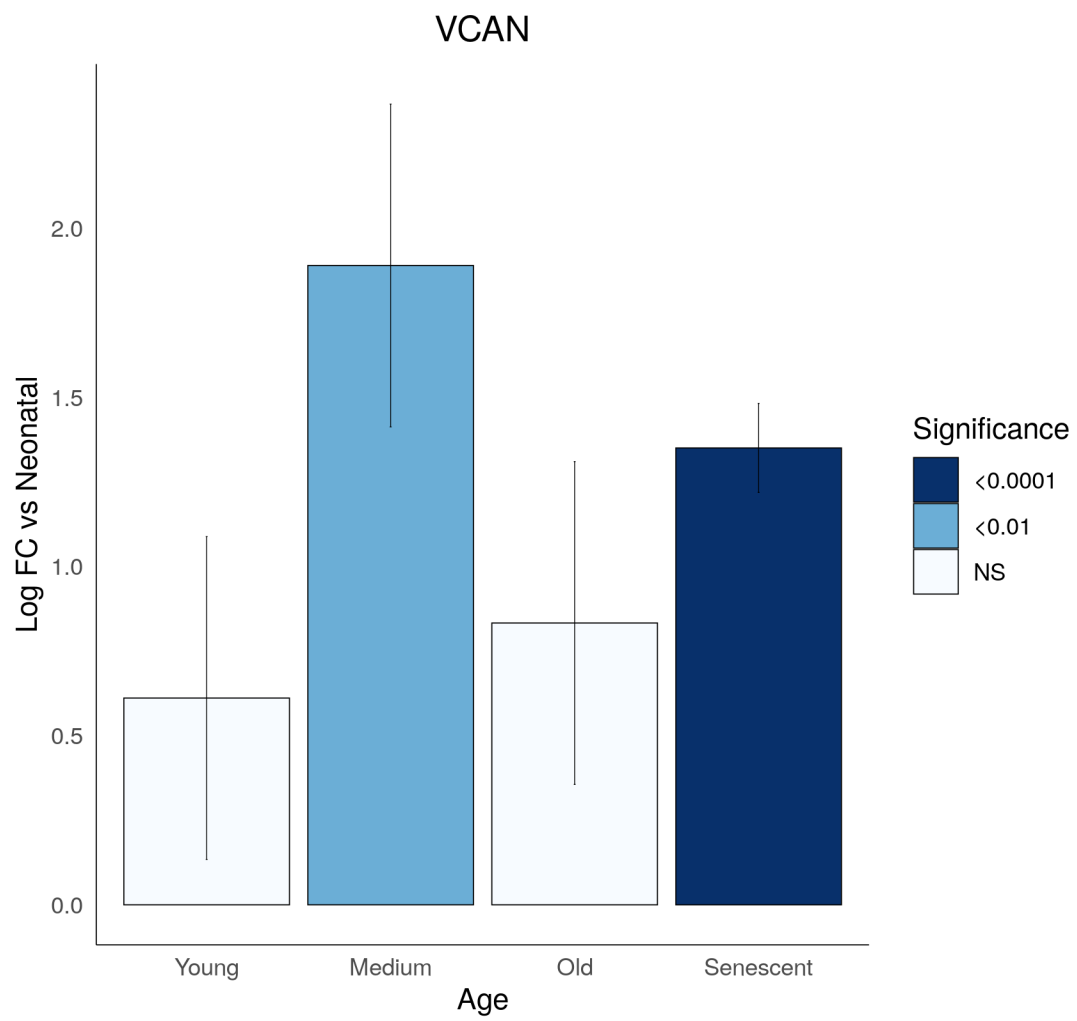

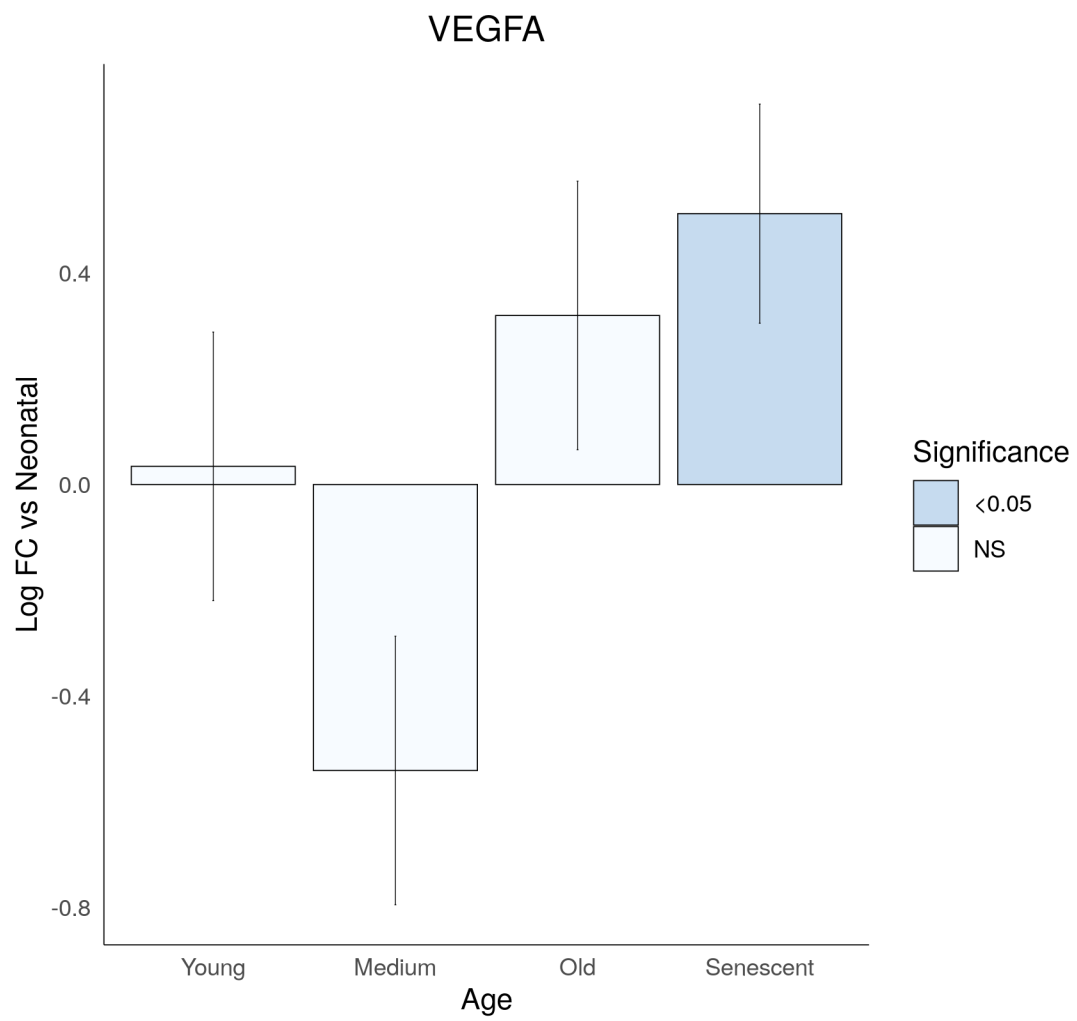

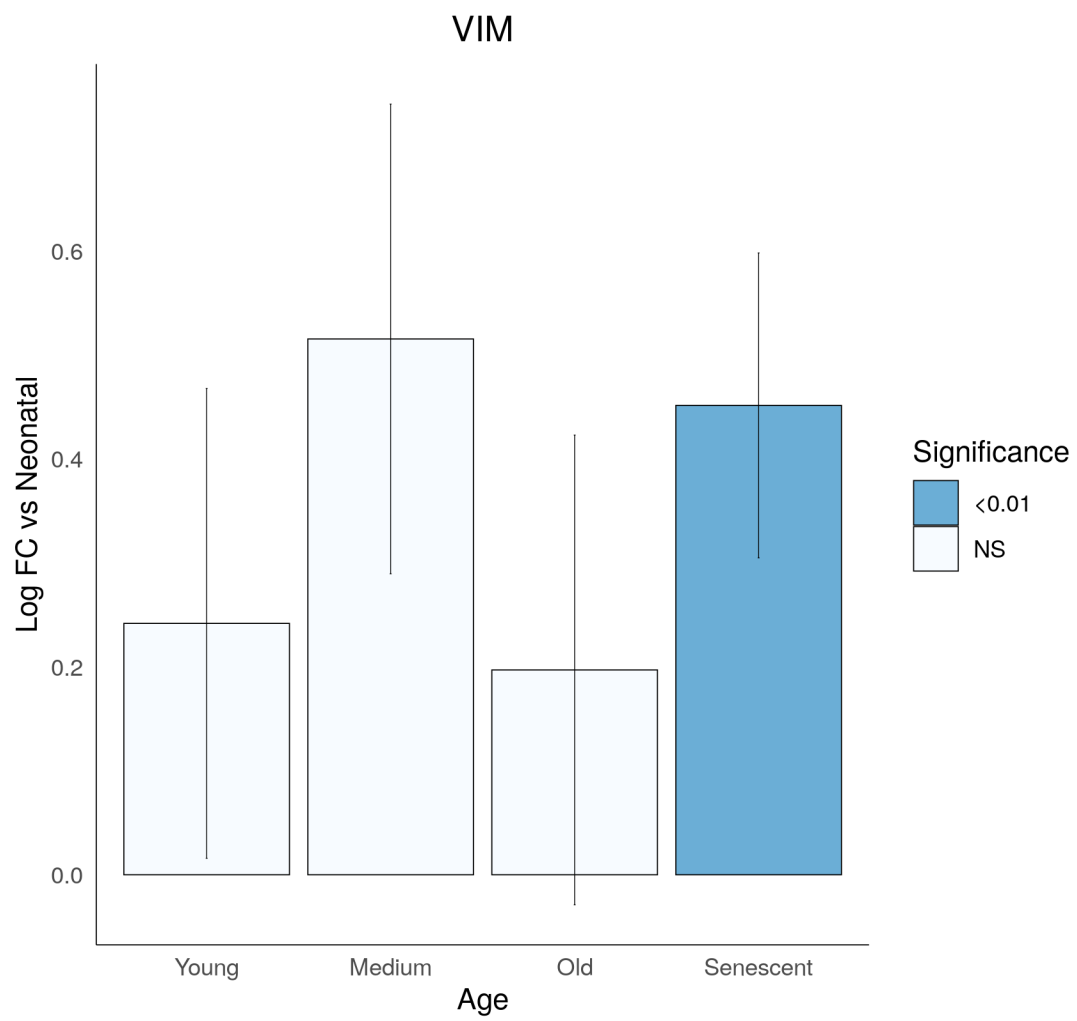

Supplement: s1 [file s1]
