# Supplementary material for: Cell Senescence-Independent Changes of Human Skin Fibroblasts with Age
Source: MDPI journal article supplement (doi:10.3390/cells13080659), 2024-04-09
Supplement: s1 [file s1]

# Supplementary Figures

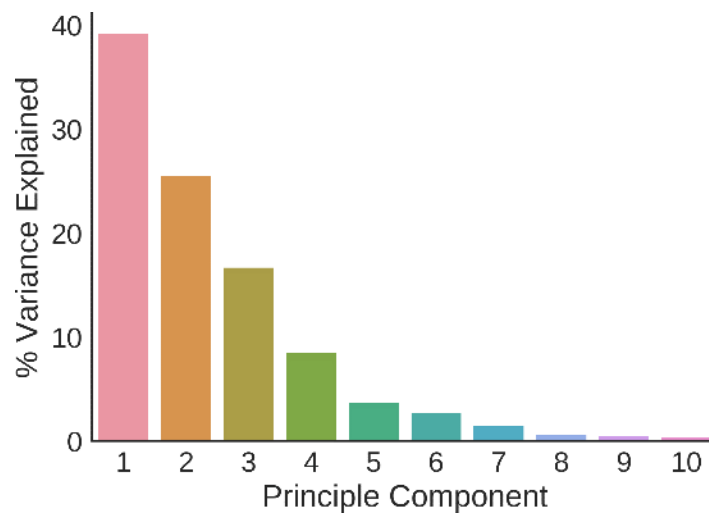

Figure S1 | Plot showing the percent of variance explained for the first 10 principal components.

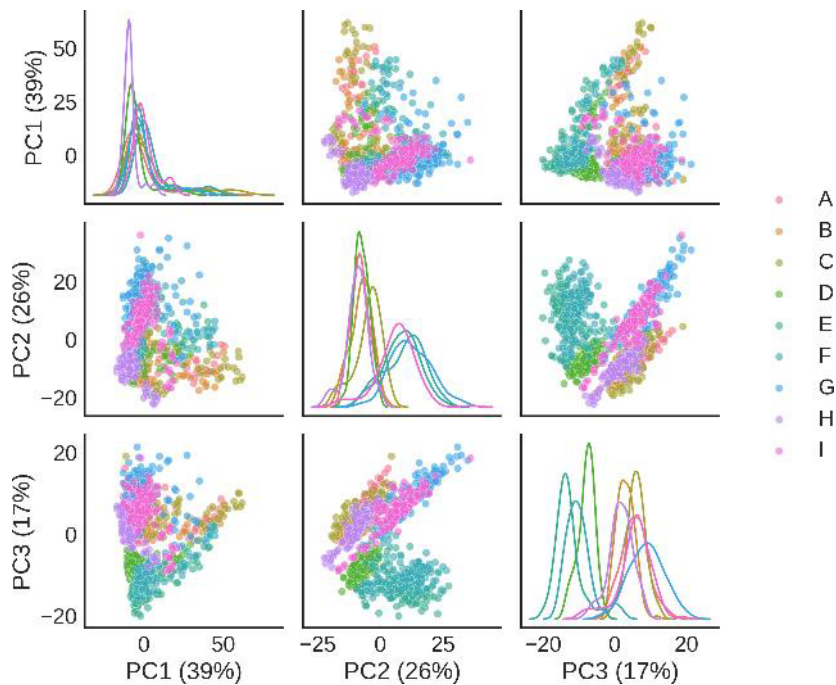

Figure S2 | Scatter matrix of first three principle components coloured by cell id.

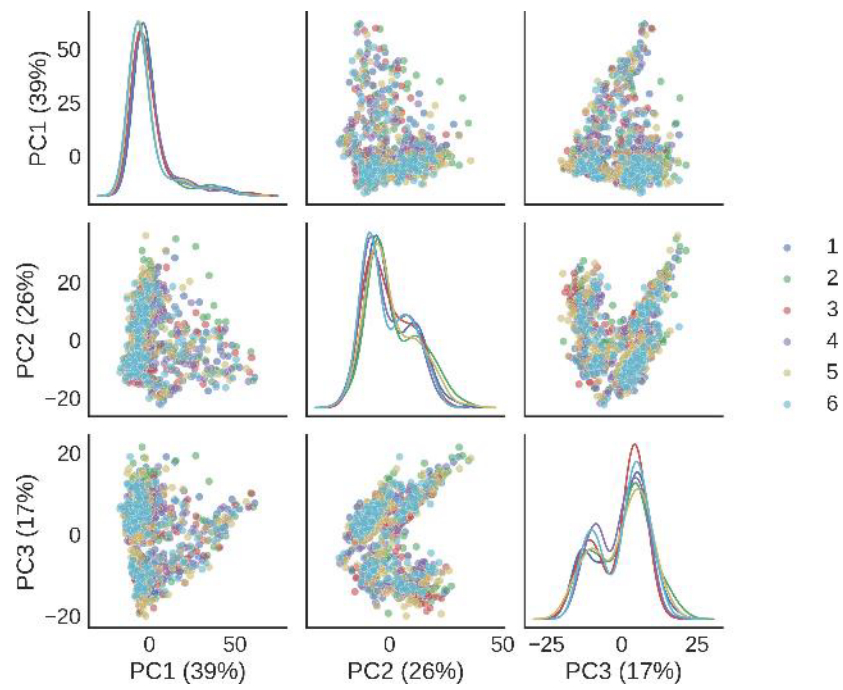

Figure S3 | Scatter matrix of first three principle components coloured by replicate.

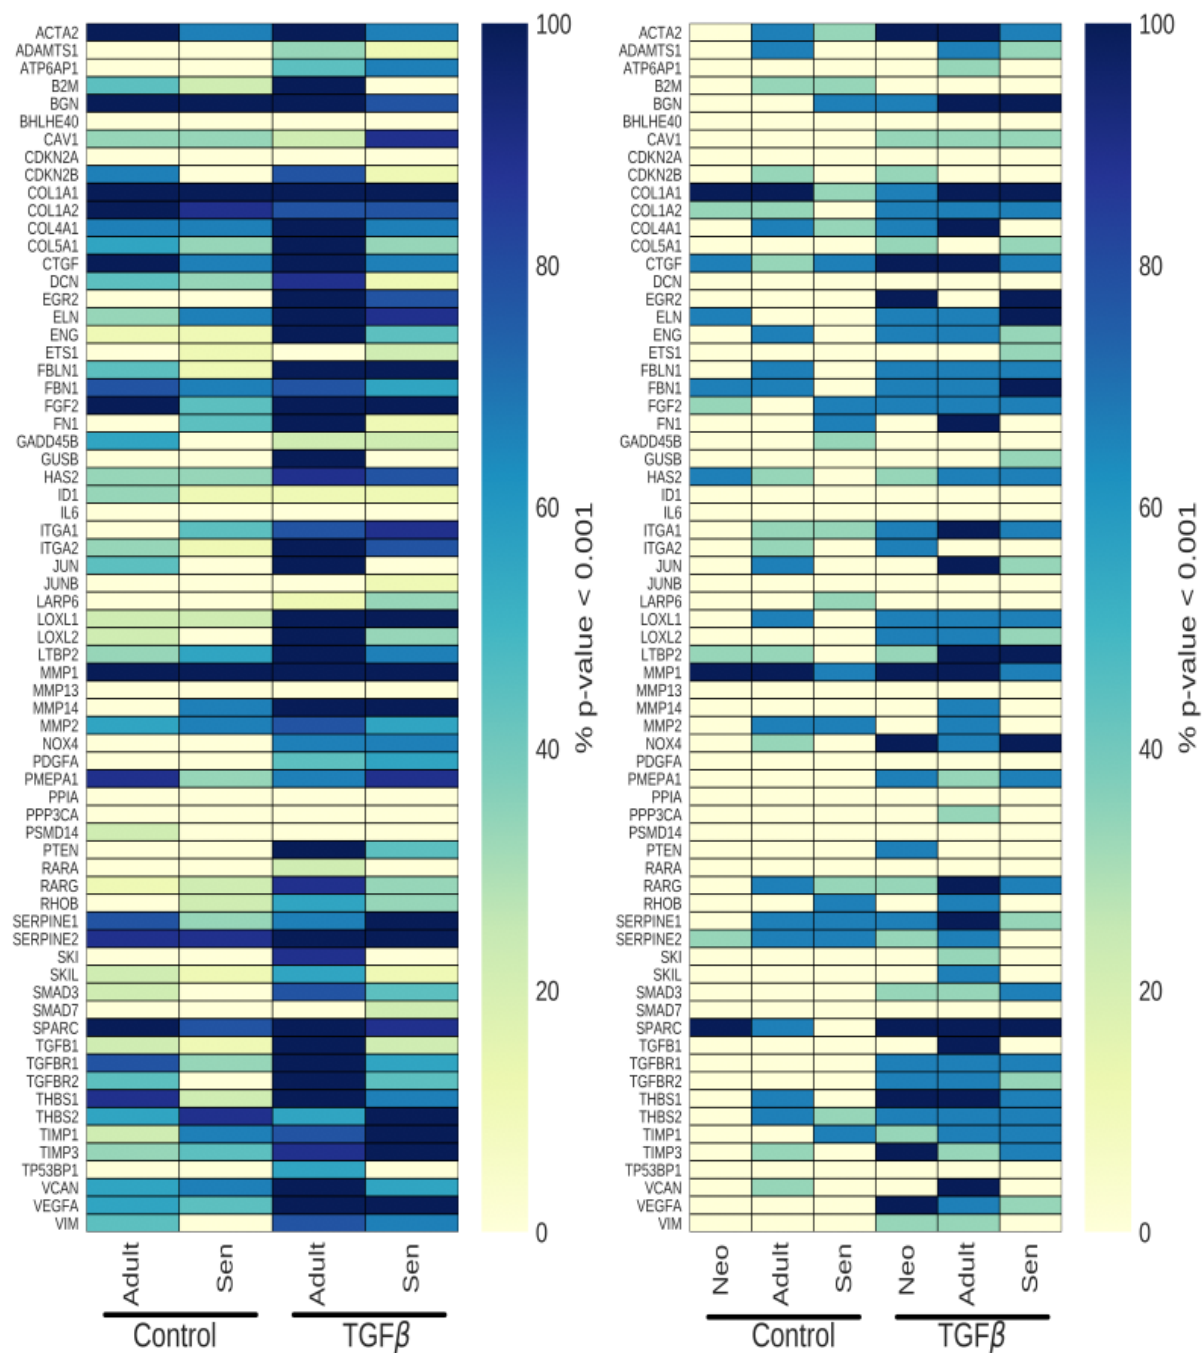

Figure S4 | Differential expression analysis for (a) between groups comparisons and (b) within groups comparisons. Colours indicate the percentage of the time of all combinations (9 for between groups and 3 for within groups) of LIMMA analysis conducted that a time series was differentially expressed with a FDR corrected  $p$ -value  $< 0.001$ .

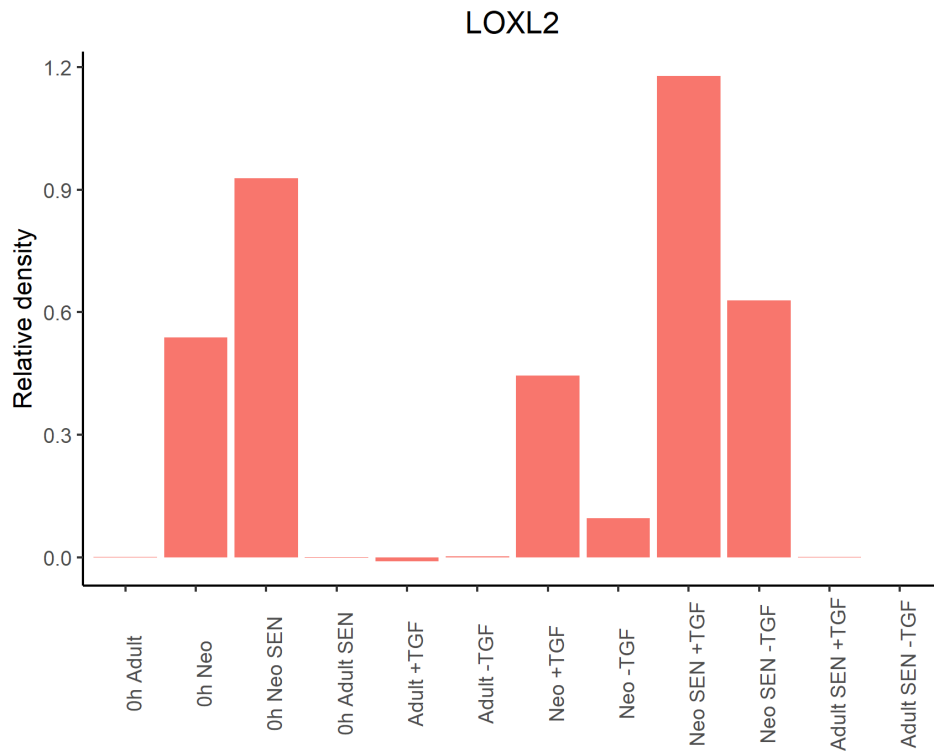

Figure S5 |Densitometry for  $\alpha$ SMA and TAGLN for blots found in Figure 2.

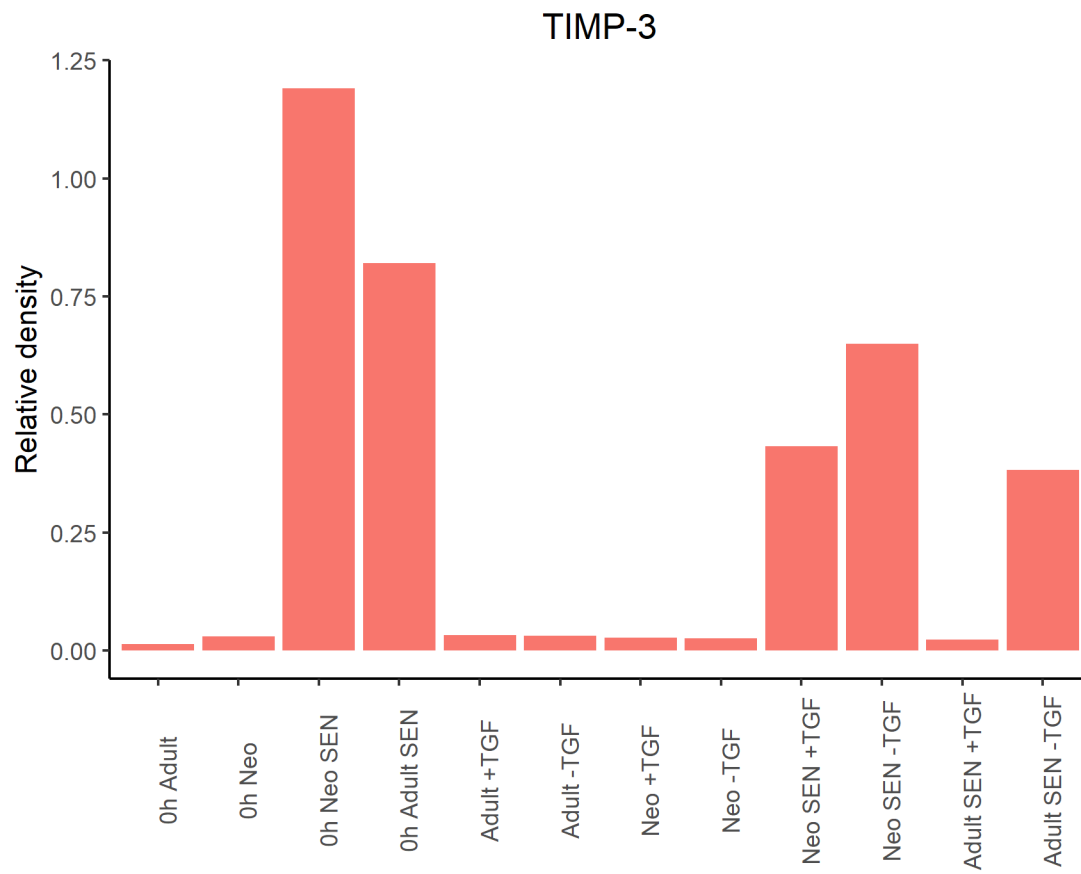

Figure S6 |Densitometry for TIMP3 for blots found in Figure 3.

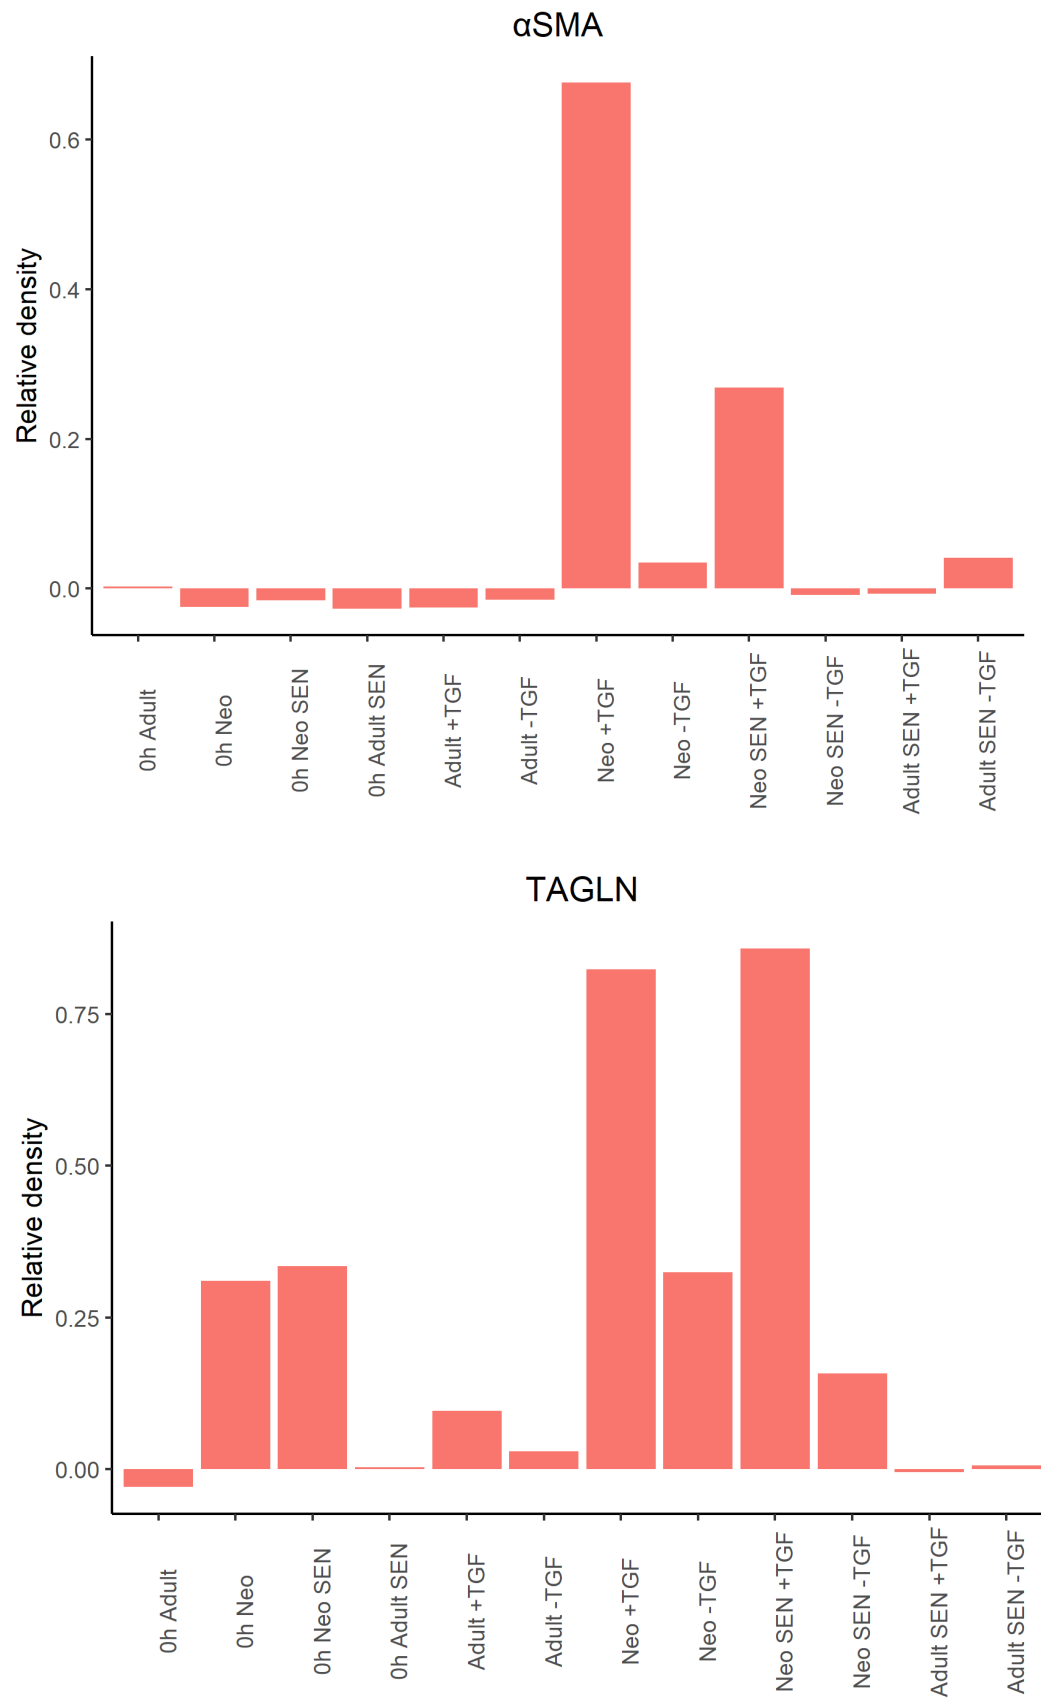

Figure S7 | Densitometry for  $\alpha$ SMA and TAGLN for blots found in Figure 7.

| Comparison             | Control | TGF- $\beta$ |
|------------------------|---------|--------------|
| Adult Vs neonatal      | 16      | 46           |
| Senescent Vs neonatal  | 16      | 30           |
| Neonatal Vs neonatal   | 7       | 28           |
| Adult Vs adult         | 17      | 37           |
| Senescent Vs senescent | 10      | 25           |

*Table S1 | Table summarising the number of genes per comparison that were differentially expressed with a (FDR corrected) p-value <0.001 in over 60% of LIMMA analyses per comparison.*
