# Supplementary material for: Cell Senescence-Independent Changes of Human Skin Fibroblasts with Age
Source: Cells. 2024 Apr 9;13(8):659. doi: 10.3390/cells13080659 (PMC11048776; doi:10.3390/cells13080659)
Supplement: Supplementary file 1 [file cells-13-00659-s001.zip]

Archive with 7 entries (7 files):
- cells-2907289-supplementary figures and table.pdf
- Supplementary file 2.pdf
- Supplementary file 3.pdf
- Supplementary file 4.pdf
- Supplementary file 5.pdf
- Supplementary file 6.pdf
- Supplemtary file 1.zip
